# Supplementary material for: Characteristics of planktonic and sediment bacterial communities in a heavily polluted urban river
Source: PeerJ. 2021 Feb 24;9:e10866. doi: 10.7717/peerj.10866 (PMC7912603; doi:10.7717/peerj.10866)
Supplement: Supplemental Information 4 [file peerj-09-10866-s004.xlsx]

## Sheet: OTU_metadata
Domain	Kingdom	Phylum	Class	Order	Family	Genus	Species	OTU	SFe1	SFe2	SFe3	SFe4	SFe5	SAu1	SAu2	SAu3	SAu4	SAu5	WFe1	WFe2	WFe3	WFe4	WFe5	WAu1	WAu2	WAu3	WAu4	WAu5	SUM
d__Bacteria	k__norank_d__Bacteria	p__Cyanobacteria	c__Cyanobacteriia	o__Chloroplast	f__norank_o__Chloroplast	g__norank_f__norank_o__Chloroplast	s__unclassified_g__norank_f__norank_o__Chloroplast	OTU7421	0	0	0	0	0	0	0	0	0	0	2	0	0	0	1	0	0	0	0	0	3
d__Bacteria	k__norank_d__Bacteria	p__Bacteroidota	c__Bacteroidia	o__Bacteroidales	f__Prolixibacteraceae	g__norank_f__Prolixibacteraceae	s__uncultured_prokaryote_g__norank_f__Prolixibacteraceae	OTU1500	4	18	5	43	14	0	12	1	0	26	13	13	18	9	12	4	1	2	2	6	203
d__Bacteria	k__norank_d__Bacteria	p__Myxococcota	c__Polyangia	o__mle1-27	f__norank_o__mle1-27	g__norank_f__norank_o__mle1-27	s__uncultured_bacterium_mle1-27	OTU1459	0	0	3	1	0	0	0	0	0	0	0	0	0	0	0	0	0	0	0	0	4
d__Bacteria	k__norank_d__Bacteria	p__Verrucomicrobiota	c__Chlamydiae	o__Chlamydiales	f__unclassified_o__Chlamydiales	g__unclassified_o__Chlamydiales	s__unclassified_o__Chlamydiales	OTU3794	0	1	0	0	0	0	0	0	0	0	0	0	0	0	0	0	0	0	0	0	1
d__Bacteria	k__norank_d__Bacteria	p__Firmicutes	c__Bacilli	o__Paenibacillales	f__Paenibacillaceae	g__Paenibacillus	s__Paenibacillus_kobensis	OTU3704	0	0	0	0	0	4	2	0	1	0	0	0	0	0	0	0	0	0	0	0	7
d__Bacteria	k__norank_d__Bacteria	p__Cyanobacteria	c__Cyanobacteriia	o__Chloroplast	f__norank_o__Chloroplast	g__norank_f__norank_o__Chloroplast	s__unclassified_g__norank_f__norank_o__Chloroplast	OTU7952	0	0	0	0	0	0	0	0	0	0	0	0	0	0	0	2	3	0	1	0	6
d__Bacteria	k__norank_d__Bacteria	p__Actinobacteriota	c__Acidimicrobiia	o__IMCC26256	f__norank_o__IMCC26256	g__norank_f__norank_o__IMCC26256	s__unclassified_g__norank_f__norank_o__IMCC26256	OTU2242	2	2	0	0	0	2	2	1	0	1	0	0	0	0	0	0	0	0	0	0	10
d__Bacteria	k__norank_d__Bacteria	p__Proteobacteria	c__Gammaproteobacteria	o__Burkholderiales	f__unclassified_o__Burkholderiales	g__unclassified_o__Burkholderiales	s__unclassified_o__Burkholderiales	OTU6596	0	0	0	0	0	0	0	0	0	0	8	1	7	7	4	0	0	0	0	0	27
d__Bacteria	k__norank_d__Bacteria	p__Patescibacteria	c__CPR2	o__norank_c__CPR2	f__norank_o__norank_c__CPR2	g__norank_f__norank_o__norank_c__CPR2	s__uncultured_bacterium_g__norank_f__norank_o__norank_c__CPR2	OTU3538	1	0	0	1	1	0	3	0	0	3	0	0	0	0	1	1	1	1	0	1	14
d__Bacteria	k__norank_d__Bacteria	p__Abditibacteriota	c__Abditibacteria	o__Abditibacteriales	f__Abditibacteriaceae	g__Abditibacterium	s__metagenome_g__Abditibacterium	OTU4776	0	0	0	0	1	2	0	1	0	0	0	0	0	0	0	0	0	0	0	0	4
d__Bacteria	k__norank_d__Bacteria	p__Chloroflexi	c__Dehalococcoidia	o__S085	f__norank_o__S085	g__norank_f__norank_o__S085	s__unclassified_g__norank_f__norank_o__S085	OTU6036	3	0	0	0	0	0	2	1	0	1	0	0	0	0	0	0	0	0	0	0	7
d__Bacteria	k__norank_d__Bacteria	p__Proteobacteria	c__Alphaproteobacteria	o__Tistrellales	f__Geminicoccaceae	g__norank_f__Geminicoccaceae	s__uncultured_bacterium_g__norank_f__Geminicoccaceae	OTU1721	0	0	0	1	0	0	1	2	0	1	0	0	0	0	0	0	0	0	0	0	5
d__Bacteria	k__norank_d__Bacteria	p__Bacteroidota	c__Bacteroidia	o__Bacteroidales	f__Dysgonomonadaceae	g__norank_f__Dysgonomonadaceae	s__uncultured_soil_bacterium_g__norank_f__Dysgonomonadaceae	OTU2290	0	7	2	0	0	4	0	0	1	0	1	0	1	0	0	0	0	0	0	0	16
d__Bacteria	k__norank_d__Bacteria	p__Nitrospirota	c__Thermodesulfovibrionia	o__norank_c__Thermodesulfovibrionia	f__norank_o__norank_c__Thermodesulfovibrionia	g__norank_f__norank_o__norank_c__Thermodesulfovibrionia	s__uncultured_bacterium_g__norank_f__norank_o__norank_c__Thermodesulfovibrionia	OTU1226	0	0	1	1	0	0	2	0	4	0	0	0	0	0	0	0	0	0	0	0	8
d__Bacteria	k__norank_d__Bacteria	p__Firmicutes	c__Clostridia	o__norank_c__Clostridia	f__Hungateiclostridiaceae	g__norank_f__Hungateiclostridiaceae	s__uncultured_bacterium_g__norank_f__Hungateiclostridiaceae	OTU2787	0	1	0	0	0	2	0	0	1	0	0	0	0	0	0	0	0	0	0	0	4
d__Bacteria	k__norank_d__Bacteria	p__Patescibacteria	c__Gracilibacteria	o__norank_c__Gracilibacteria	f__norank_o__norank_c__Gracilibacteria	g__norank_f__norank_o__norank_c__Gracilibacteria	s__uncultured_beta_proteobacterium_g__norank_f__norank_o__norank	OTU8135	0	0	1	0	0	0	0	0	0	0	0	0	0	0	0	0	0	0	0	0	1
d__Bacteria	k__norank_d__Bacteria	p__Acidobacteriota	c__Holophagae	o__Holophagales	f__Holophagaceae	g__norank_f__Holophagaceae	s__metagenome_g__norank_f__Holophagaceae	OTU6678	8	17	33	12	5	0	3	0	0	0	1	0	0	0	1	0	0	0	0	0	80
d__Bacteria	k__norank_d__Bacteria	p__Chloroflexi	c__Dehalococcoidia	o__S085	f__norank_o__S085	g__norank_f__norank_o__S085	s__unclassified_g__norank_f__norank_o__S085	OTU3604	2	0	0	0	0	1	1	0	0	0	0	0	0	0	0	0	0	0	0	0	4
d__Bacteria	k__norank_d__Bacteria	p__Proteobacteria	c__Gammaproteobacteria	o__Burkholderiales	f__unclassified_o__Burkholderiales	g__unclassified_o__Burkholderiales	s__unclassified_o__Burkholderiales	OTU5712	0	1	1	2	1	0	1	5	1	6	0	0	0	0	0	0	0	0	0	0	18
d__Bacteria	k__norank_d__Bacteria	p__LCP-89	c__norank_p__LCP-89	o__norank_c__norank_p__LCP-89	f__norank_o__norank_c__norank_p__LCP-89	g__norank_f__norank_o__norank_c__norank_p__LCP-89	s__unclassified_g__norank_f__norank_o__norank_c__norank_p__LCP-89	OTU5457	0	0	0	0	0	1	0	0	2	0	0	0	0	0	0	0	0	0	0	0	3
d__Bacteria	k__norank_d__Bacteria	p__Proteobacteria	c__Gammaproteobacteria	o__unclassified_c__Gammaproteobacteria	f__unclassified_c__Gammaproteobacteria	g__unclassified_c__Gammaproteobacteria	s__unclassified_c__Gammaproteobacteria	OTU7580	0	0	0	0	0	0	0	0	0	0	0	0	0	0	0	1	0	0	0	0	1
d__Bacteria	k__norank_d__Bacteria	p__Verrucomicrobiota	c__Chlamydiae	o__Chlamydiales	f__cvE6	g__norank_f__cvE6	s__unclassified_g__norank_f__cvE6	OTU6644	0	0	0	0	0	0	0	0	0	0	1	1	1	0	0	0	0	0	0	2	5
d__Bacteria	k__norank_d__Bacteria	p__Planctomycetota	c__Planctomycetes	o__Isosphaerales	f__Isosphaeraceae	g__Paludisphaera	s__Planctomyces_sp._SH-PL62	OTU5764	1	1	1	0	0	1	0	0	0	1	0	0	0	0	0	0	0	0	0	0	5
d__Bacteria	k__norank_d__Bacteria	p__Proteobacteria	c__Alphaproteobacteria	o__Acetobacterales	f__Acetobacteraceae	g__Craurococcus-Caldovatus	s__uncultured_bacterium_g__Craurococcus-Caldovatus	OTU1959	0	0	0	0	2	0	0	0	0	0	0	0	0	0	0	0	0	0	0	0	2
d__Bacteria	k__norank_d__Bacteria	p__Proteobacteria	c__Gammaproteobacteria	o__Gammaproteobacteria_Incertae_Sedis	f__unclassified_o__Gammaproteobacteria_Incertae_Sedis	g__norank_f__unclassified	s__unclassified_g__norank_f__unclassified	OTU3125	1	0	0	1	0	2	0	0	0	0	1	0	0	0	0	0	0	0	0	0	5
d__Bacteria	k__norank_d__Bacteria	p__Patescibacteria	c__ABY1	o__Candidatus_Komeilibacteria	f__norank_o__Candidatus_Komeilibacteria	g__norank_f__norank_o__Candidatus_Komeilibacteria	s__Candidatus_Komeilibacteria_bacterium_RIFCSPHIGHO2_01_FULL_52_14	OTU7751	0	0	0	0	0	1	0	0	0	0	0	0	0	0	0	3	0	0	0	0	4
d__Bacteria	k__norank_d__Bacteria	p__Firmicutes	c__Clostridia	o__norank_c__Clostridia	f__Hungateiclostridiaceae	g__norank_f__Hungateiclostridiaceae	s__metagenome_g__norank_f__Hungateiclostridiaceae	OTU4697	2	5	2	9	1	3	19	2	5	2	0	0	0	0	0	0	0	0	0	0	50
d__Bacteria	k__norank_d__Bacteria	p__Bacteroidota	c__Bacteroidia	o__Bacteroidales	f__Dysgonomonadaceae	g__Dysgonomonas	s__uncultured_bacterium_g__Dysgonomonas	OTU8674	0	0	0	0	0	0	0	0	0	0	0	0	0	0	0	1	0	1	0	2	4
d__Bacteria	k__norank_d__Bacteria	p__Patescibacteria	c__unclassified_p__Patescibacteria	o__unclassified_p__Patescibacteria	f__unclassified_p__Patescibacteria	g__unclassified_p__Patescibacteria	s__unclassified_p__Patescibacteria	OTU8681	0	0	0	0	0	0	0	0	0	0	0	0	0	0	1	0	0	1	0	0	2
d__Bacteria	k__norank_d__Bacteria	p__Myxococcota	c__Myxococcia	o__Myxococcales	f__Myxococcaceae	g__P3OB-42	s__uncultured_bacterium_g__P3OB-42	OTU3773	0	4	0	0	0	0	6	0	0	0	0	0	0	0	0	0	0	0	0	0	10
d__Bacteria	k__norank_d__Bacteria	p__Bacteroidota	c__Bacteroidia	o__Cytophagales	f__Spirosomaceae	g__Emticicia	s__uncultured_bacterium_g__Emticicia	OTU7519	0	0	0	0	1	0	0	0	0	0	7	17	2	6	1	63	256	14	9	22	398
d__Bacteria	k__norank_d__Bacteria	p__Methylomirabilota	c__Methylomirabilia	o__Rokubacteriales	f__WX65	g__norank_f__WX65	s__uncultured_bacterium_g__norank_f__WX65	OTU2459	1	0	0	0	0	9	1	0	1	0	0	0	0	0	0	0	0	0	0	0	12
d__Bacteria	k__norank_d__Bacteria	p__Firmicutes	c__Bacilli	o__Bacillales	f__Bacillaceae	g__Bacillus	s__Bacillus_anthracis_g__Bacillus	OTU4289	27	2	1	7	22	9	8	59	15	28	6	11	1	5	2	5	26	3	12	2	251
d__Bacteria	k__norank_d__Bacteria	p__Chloroflexi	c__KD4-96	o__norank_c__KD4-96	f__norank_o__norank_c__KD4-96	g__norank_f__norank_o__norank_c__KD4-96	s__uncultured_bacterium_g__norank_f__norank_o__norank_c__KD4-96	OTU2733	70	24	31	15	49	225	27	51	31	45	0	3	1	4	0	1	3	0	0	0	580
d__Bacteria	k__norank_d__Bacteria	p__Chloroflexi	c__KD4-96	o__norank_c__KD4-96	f__norank_o__norank_c__KD4-96	g__norank_f__norank_o__norank_c__KD4-96	s__uncultured_bacterium_g__norank_f__norank_o__norank_c__KD4-96	OTU2735	21	10	9	5	4	51	20	19	4	11	2	0	0	0	0	1	0	0	1	0	158
d__Bacteria	k__norank_d__Bacteria	p__Spirochaetota	c__Spirochaetia	o__Spirochaetales	f__Spirochaetaceae	g__norank_f__Spirochaetaceae	s__uncultured_bacterium_g__norank_f__Spirochaetaceae	OTU5744	0	7	1	4	0	0	1	2	0	0	0	0	1	0	0	0	1	0	1	0	18
d__Bacteria	k__norank_d__Bacteria	p__Firmicutes	c__D8A-2	o__norank_c__D8A-2	f__norank_o__norank_c__D8A-2	g__norank_f__norank_o__norank_c__D8A-2	s__uncultured_Firmicutes_bacterium_g__norank_f__norank_o__norank_c__D8A-2	OTU2499	0	0	0	0	0	1	0	0	0	0	0	0	0	0	0	0	0	0	0	0	1
d__Bacteria	k__norank_d__Bacteria	p__LCP-89	c__norank_p__LCP-89	o__norank_c__norank_p__LCP-89	f__norank_o__norank_c__norank_p__LCP-89	g__norank_f__norank_o__norank_c__norank_p__LCP-89	s__unclassified_g__norank_f__norank_o__norank_c__norank_p__LCP-89	OTU3672	0	0	3	0	0	1	0	0	0	0	0	0	0	0	0	0	0	0	0	0	4
d__Bacteria	k__norank_d__Bacteria	p__Firmicutes	c__Syntrophomonadia	o__Syntrophomonadales	f__Syntrophomonadaceae	g__norank_f__Syntrophomonadaceae	s__uncultured_Syntrophomonadaceae_bacterium_g__norank	OTU4405	0	0	2	2	1	1	1	0	0	0	0	0	0	0	0	0	0	0	0	0	7
d__Bacteria	k__norank_d__Bacteria	p__Chloroflexi	c__Chloroflexia	o__Chloroflexales	f__Chloroflexaceae	g__Candidatus_Chloroploca	s__unclassified_g__Candidatus_Chloroploca	OTU1029	0	0	1	0	0	0	1	0	0	0	0	0	0	0	0	0	1	0	0	0	3
d__Bacteria	k__norank_d__Bacteria	p__Firmicutes	c__Bacilli	o__Alicyclobacillales	f__Alicyclobacillaceae	g__Tumebacillus	s__uncultured_bacterium_g__Tumebacillus	OTU4847	1	1	0	1	2	0	0	5	2	0	0	0	0	0	0	0	0	0	0	0	12
d__Bacteria	k__norank_d__Bacteria	p__Actinobacteriota	c__Coriobacteriia	o__FS118-23B-02	f__norank_o__FS118-23B-02	g__norank_f__norank_o__FS118-23B-02	s__marine_sediment_metagenome_g__norank_f__norank_o__FS118-23B-02	OTU2800	0	0	0	0	0	2	0	0	0	0	0	0	0	0	0	0	0	0	0	0	2
d__Bacteria	k__norank_d__Bacteria	p__Chloroflexi	c__Ktedonobacteria	o__C0119	f__norank_o__C0119	g__norank_f__norank_o__C0119	s__uncultured_Thermobaculum_sp.	OTU4687	0	0	0	0	0	0	1	2	3	0	0	0	0	0	0	0	0	0	0	0	6
d__Bacteria	k__norank_d__Bacteria	p__Chloroflexi	c__Chloroflexia	o__Chloroflexales	f__Roseiflexaceae	g__Kouleothrix	s__uncultured_bacterium_g__Kouleothrix	OTU4439	3	0	48	32	0	0	2	1219	2	7	0	0	0	0	0	0	0	1	18	15	1347
d__Bacteria	k__norank_d__Bacteria	p__Bacteroidota	c__Bacteroidia	o__Bacteroidales	f__Prolixibacteraceae	g__BSV13	s__uncultured_bacterium_g__BSV13	OTU4099	1	2	1	3	0	0	6	0	0	0	1	2	1	1	0	2	0	2	0	1	23
d__Bacteria	k__norank_d__Bacteria	p__Desulfobacterota	c__Syntrophia	o__Syntrophales	f__norank_o__Syntrophales	g__norank_f__norank_o__Syntrophales	s__unclassified_g__norank_f__norank_o__Syntrophales	OTU631	0	0	0	0	0	1	0	0	0	0	0	0	0	0	0	0	0	0	0	0	1
d__Bacteria	k__norank_d__Bacteria	p__Bacteroidota	c__Bacteroidia	o__Bacteroidales	f__SB-5	g__norank_f__SB-5	s__unclassified_g__norank_f__SB-5	OTU3900	0	1	0	0	0	0	2	0	1	0	0	0	0	0	0	0	0	0	0	0	4
d__Bacteria	k__norank_d__Bacteria	p__Verrucomicrobiota	c__Chlamydiae	o__Chlamydiales	f__Parachlamydiaceae	g__Neochlamydia	s__unclassified_g__Neochlamydia	OTU7875	0	0	0	0	0	0	0	0	0	0	1	0	1	0	0	0	2	0	1	1	6
d__Bacteria	k__norank_d__Bacteria	p__Verrucomicrobiota	c__Kiritimatiellae	o__WCHB1-41	f__norank_o__WCHB1-41	g__norank_f__norank_o__WCHB1-41	s__uncultured_soil_bacterium_PBS-III-20	OTU5365	0	1	0	0	0	0	0	0	1	0	0	0	0	0	0	0	0	0	0	0	2
d__Bacteria	k__norank_d__Bacteria	p__Bacteroidota	c__Bacteroidia	o__Cytophagales	f__Spirosomaceae	g__Arcicella	s__Arcicella_rigui	OTU8219	0	0	0	0	0	0	0	0	0	0	2	1	0	0	1	0	0	1	0	3	8
d__Bacteria	k__norank_d__Bacteria	p__Chloroflexi	c__KD4-96	o__norank_c__KD4-96	f__norank_o__norank_c__KD4-96	g__norank_f__norank_o__norank_c__KD4-96	s__metagenome_g__norank_f__norank_o__norank_c__KD4-96	OTU952	129	370	98	59	144	121	149	172	48	468	9	6	3	4	5	8	16	6	9	15	1839
d__Bacteria	k__norank_d__Bacteria	p__Bacteroidota	c__Bacteroidia	o__Bacteroidales	f__Prevotellaceae	g__unclassified_f__Prevotellaceae	s__unclassified_f__Prevotellaceae	OTU7573	0	0	0	0	0	0	0	0	0	0	0	0	0	0	1	0	0	0	0	0	1
d__Bacteria	k__norank_d__Bacteria	p__Proteobacteria	c__Gammaproteobacteria	o__Burkholderiales	f__Rhodocyclaceae	g__unclassified_f__Rhodocyclaceae	s__unclassified_f__Rhodocyclaceae	OTU4860	0	0	4	4	1	1	0	1	0	0	0	0	0	0	0	0	0	0	0	2	13
d__Bacteria	k__norank_d__Bacteria	p__Verrucomicrobiota	c__Lentisphaeria	o__Victivallales	f__norank_o__Victivallales	g__norank_f__norank_o__Victivallales	s__uncultured_bacterium_g__norank_f__norank_o__Victivallales	OTU6824	0	0	0	0	0	0	0	0	0	0	2	1	0	0	0	0	0	0	0	0	3
d__Bacteria	k__norank_d__Bacteria	p__Desulfobacterota	c__Desulfovibrionia	o__Desulfovibrionales	f__Desulfovibrionaceae	g__norank_f__Desulfovibrionaceae	s__uncultured_delta_proteobacterium_g__norank_f__Desulfovibrionaceae	OTU1370	0	0	0	0	0	0	0	0	0	0	0	0	0	0	0	0	1	1	0	0	2
d__Bacteria	k__norank_d__Bacteria	p__Proteobacteria	c__Gammaproteobacteria	o__Burkholderiales	f__Rhodocyclaceae	g__norank_f__Rhodocyclaceae	s__uncultured_bacterium_g__norank_f__Rhodocyclaceae	OTU6420	14	14	12	5	7	5	3	11	9	12	1	0	0	2	0	0	1	3	4	7	110
d__Bacteria	k__norank_d__Bacteria	p__Proteobacteria	c__Gammaproteobacteria	o__Burkholderiales	f__SC-I-84	g__norank_f__SC-I-84	s__uncultured_bacterium_g__norank_f__SC-I-84	OTU5063	1	0	0	0	1	0	2	0	0	0	0	0	0	0	0	0	0	0	0	0	4
d__Bacteria	k__norank_d__Bacteria	p__Chloroflexi	c__Chloroflexia	o__Chloroflexales	f__Chloroflexaceae	g__Chloronema	s__uncultured_bacterium_g__Chloronema	OTU3318	0	0	0	0	0	0	2	0	0	0	0	0	0	0	0	0	0	0	0	0	2
d__Bacteria	k__norank_d__Bacteria	p__Patescibacteria	c__WWE3	o__norank_c__WWE3	f__norank_o__norank_c__WWE3	g__norank_f__norank_o__norank_c__WWE3	s__uncultured_anaerobic_bacterium_g__norank_f__norank_o__norank_c__WWE3	OTU851	0	1	1	0	3	0	2	0	1	0	0	1	1	0	1	1	1	0	0	0	13
d__Bacteria	k__norank_d__Bacteria	p__unclassified_k__norank_d__Bacteria	c__unclassified_k__norank_d__Bacteria	o__unclassified_k__norank_d__Bacteria	f__unclassified_k__norank_d__Bacteria	g__unclassified_k__norank_d__Bacteria	s__unclassified_k__norank_d__Bacteria	OTU7622	0	0	0	0	0	0	0	0	0	0	0	0	0	0	0	1	0	0	0	1	2
d__Bacteria	k__norank_d__Bacteria	p__Bacteroidota	c__Bacteroidia	o__Flavobacteriales	f__Flavobacteriaceae	g__Winogradskyella	s__unclassified_g__Winogradskyella	OTU8262	0	0	0	0	0	0	0	0	0	0	0	0	0	0	0	0	0	0	2	0	2
d__Bacteria	k__norank_d__Bacteria	p__Patescibacteria	c__Berkelbacteria	o__norank_c__Berkelbacteria	f__norank_o__norank_c__Berkelbacteria	g__norank_f__norank_o__norank_c__Berkelbacteria	s__unclassified_g__norank_f__norank_o__norank_c__Berkelbacteria	OTU4827	0	0	1	0	0	0	0	1	0	0	0	0	0	0	0	0	0	0	0	0	2
d__Bacteria	k__norank_d__Bacteria	p__unclassified_k__norank_d__Bacteria	c__unclassified_k__norank_d__Bacteria	o__unclassified_k__norank_d__Bacteria	f__unclassified_k__norank_d__Bacteria	g__unclassified_k__norank_d__Bacteria	s__unclassified_k__norank_d__Bacteria	OTU4026	0	0	0	0	0	0	2	0	0	0	0	0	0	0	0	0	0	0	0	0	2
d__Bacteria	k__norank_d__Bacteria	p__Planctomycetota	c__OM190	o__norank_c__OM190	f__norank_o__norank_c__OM190	g__norank_f__norank_o__norank_c__OM190	s__uncultured_bacterium_g__norank_f__norank_o__norank_c__OM190	OTU854	0	1	0	0	0	0	0	0	0	0	0	0	0	0	0	0	0	0	0	0	1
d__Bacteria	k__norank_d__Bacteria	p__Bacteroidota	c__Bacteroidia	o__Flavobacteriales	f__Flavobacteriaceae	g__Flavobacterium	s__uncultured_soil_bacterium_g__Flavobacterium	OTU7565	3	15	4	4	2	0	0	0	0	0	6	6	5	6	4	222	139	156	141	78	791
d__Bacteria	k__norank_d__Bacteria	p__Chloroflexi	c__JG30-KF-CM66	o__norank_c__JG30-KF-CM66	f__norank_o__norank_c__JG30-KF-CM66	g__norank_f__norank_o__norank_c__JG30-KF-CM66	s__metagenome_g__norank_f__norank_o__norank_c__JG30-KF-CM66	OTU3990	6	0	0	0	0	3	2	0	0	0	0	0	0	0	0	0	0	0	0	0	11
d__Bacteria	k__norank_d__Bacteria	p__Chloroflexi	c__Anaerolineae	o__Anaerolineales	f__Anaerolineaceae	g__norank_f__Anaerolineaceae	s__unclassified_g__norank_f__Anaerolineaceae	OTU4178	0	3	5	2	7	0	2	1	7	1	0	0	0	0	0	0	0	0	0	1	29
d__Bacteria	k__norank_d__Bacteria	p__Chloroflexi	c__Anaerolineae	o__RBG-13-54-9	f__norank_o__RBG-13-54-9	g__norank_f__norank_o__RBG-13-54-9	s__uncultured_bacterium_g__norank_f__norank_o__RBG-13-54-9	OTU3995	0	0	0	0	0	0	1	0	1	0	0	0	0	0	0	0	0	0	0	0	2
d__Bacteria	k__norank_d__Bacteria	p__Patescibacteria	c__Saccharimonadia	o__Saccharimonadales	f__Saccharimonadaceae	g__norank_f__Saccharimonadaceae	s__uncultured_bacterium_g__norank_f__Saccharimonadaceae	OTU6681	0	0	0	0	0	0	0	0	0	0	2	0	0	2	0	1	1	0	0	0	6
d__Bacteria	k__norank_d__Bacteria	p__Proteobacteria	c__Gammaproteobacteria	o__Gammaproteobacteria_Incertae_Sedis	f__unclassified_o__Gammaproteobacteria_Incertae_Sedis	g__norank_f__unclassified	s__uncultured_sediment_bacterium_g__norank_f__unclassified	OTU6567	2	15	3	3	3	0	2	0	0	1	3	1	0	1	2	0	0	0	0	0	36
d__Bacteria	k__norank_d__Bacteria	p__Proteobacteria	c__Gammaproteobacteria	o__Aeromonadales	f__Succinivibrionaceae	g__Succinivibrionaceae_UCG-001	s__uncultured_rumen_bacterium_g__Succinivibrionaceae_UCG-001	OTU1680	4	0	0	1	1	0	0	0	0	0	0	0	1	1	0	0	0	0	0	0	8
d__Bacteria	k__norank_d__Bacteria	p__Patescibacteria	c__Parcubacteria	o__Candidatus_Kaiserbacteria	f__norank_o__Candidatus_Kaiserbacteria	g__norank_f__norank_o__Candidatus_Kaiserbacteria	s__uncultured_bacterium_g__norank_f__norank_o__Candidatus_Kaiserbacteria	OTU8892	0	0	0	0	0	0	0	0	0	0	0	0	0	1	0	0	0	0	0	1	2
d__Bacteria	k__norank_d__Bacteria	p__Proteobacteria	c__Gammaproteobacteria	o__Burkholderiales	f__Oxalobacteraceae	g__unclassified_f__Oxalobacteraceae	s__unclassified_f__Oxalobacteraceae	OTU7993	1	0	8	4	3	1	2	0	0	0	0	1	3	0	0	0	4	5	7	8	47
d__Bacteria	k__norank_d__Bacteria	p__Myxococcota	c__Myxococcia	o__Myxococcales	f__Vulgatibacteraceae	g__Vulgatibacter	s__uncultured_bacterium_g__Vulgatibacter	OTU158	1	0	0	0	0	1	0	0	0	0	0	0	0	0	0	0	0	0	0	0	2
d__Bacteria	k__norank_d__Bacteria	p__Bdellovibrionota	c__Oligoflexia	o__0319-6G20	f__norank_o__0319-6G20	g__norank_f__norank_o__0319-6G20	s__unclassified_g__norank_f__norank_o__0319-6G20	OTU2295	0	0	0	0	0	2	0	0	0	0	0	0	0	0	0	0	0	0	0	0	2
d__Bacteria	k__norank_d__Bacteria	p__Desulfobacterota	c__Desulfobacteria	o__Desulfobacterales	f__Desulfobacteraceae	g__Desulfobacter	s__Desulfobacter_postgatei_2ac9	OTU4528	0	30	3	3	9	0	4	14	0	0	1	6	3	4	5	0	1	0	0	1	84
d__Bacteria	k__norank_d__Bacteria	p__Firmicutes	c__Clostridia	o__Clostridiales	f__Clostridiaceae	g__Clostridium_sensu_stricto_5	s__unclassified_g__Clostridium_sensu_stricto_5	OTU5647	0	1	2	1	1	0	1	2	3	1	0	0	0	0	0	0	0	0	0	1	13
d__Bacteria	k__norank_d__Bacteria	p__Proteobacteria	c__Gammaproteobacteria	o__Pseudomonadales	f__Moraxellaceae	g__Enhydrobacter	s__Moraxella_osloensis_g__Enhydrobacter	OTU8328	0	1	1	0	2	0	0	0	0	0	2	26	5	2	1	0	0	1	4	2	47
d__Bacteria	k__norank_d__Bacteria	p__Chloroflexi	c__Anaerolineae	o__Anaerolineales	f__Anaerolineaceae	g__norank_f__Anaerolineaceae	s__uncultured_Anaerolineaceae_bacterium_g__norank_f__Anaerolineaceae	OTU4000	3	3	4	2	11	5	8	3	16	10	0	0	0	0	0	0	0	0	0	0	65
d__Bacteria	k__norank_d__Bacteria	p__unclassified_k__norank_d__Bacteria	c__unclassified_k__norank_d__Bacteria	o__unclassified_k__norank_d__Bacteria	f__unclassified_k__norank_d__Bacteria	g__unclassified_k__norank_d__Bacteria	s__unclassified_k__norank_d__Bacteria	OTU4741	0	0	0	0	0	0	1	0	0	0	0	0	0	0	0	0	0	0	0	0	1
d__Bacteria	k__norank_d__Bacteria	p__Bacteroidota	c__SJA-28	o__norank_c__SJA-28	f__norank_o__norank_c__SJA-28	g__norank_f__norank_o__norank_c__SJA-28	s__metagenome_g__norank_f__norank_o__norank_c__SJA-28	OTU4589	0	0	0	1	0	0	0	1	0	0	0	0	0	0	0	0	0	0	0	0	2
d__Bacteria	k__norank_d__Bacteria	p__Chloroflexi	c__Anaerolineae	o__Anaerolineales	f__Anaerolineaceae	g__norank_f__Anaerolineaceae	s__unclassified_g__norank_f__Anaerolineaceae	OTU1277	1	4	1	5	4	1	2	2	7	4	0	0	0	0	0	0	0	0	0	0	31
d__Bacteria	k__norank_d__Bacteria	p__unclassified_k__norank_d__Bacteria	c__unclassified_k__norank_d__Bacteria	o__unclassified_k__norank_d__Bacteria	f__unclassified_k__norank_d__Bacteria	g__unclassified_k__norank_d__Bacteria	s__unclassified_k__norank_d__Bacteria	OTU4742	0	0	0	1	0	1	11	2	6	0	0	0	0	0	0	0	0	0	1	0	22
d__Bacteria	k__norank_d__Bacteria	p__Chloroflexi	c__Anaerolineae	o__Anaerolineales	f__Anaerolineaceae	g__unclassified_f__Anaerolineaceae	s__unclassified_f__Anaerolineaceae	OTU1916	0	0	0	1	1	0	0	0	0	0	0	0	0	0	0	0	0	0	0	0	2
d__Bacteria	k__norank_d__Bacteria	p__Chloroflexi	c__Ktedonobacteria	o__C0119	f__norank_o__C0119	g__norank_f__norank_o__C0119	s__uncultured_Thermobaculum_sp.	OTU2267	0	0	0	0	0	1	0	0	0	0	0	0	0	0	0	0	0	0	0	0	1
d__Bacteria	k__norank_d__Bacteria	p__Actinobacteriota	c__Actinobacteria	o__PeM15	f__norank_o__PeM15	g__norank_f__norank_o__PeM15	s__unclassified_g__norank_f__norank_o__PeM15	OTU3728	9	10	9	10	2	5	14	24	3	33	0	0	1	0	0	1	2	2	1	3	129
d__Bacteria	k__norank_d__Bacteria	p__SAR324_cladeMarine_group_B	c__norank_p__SAR324_cladeMarine_group_B	o__norank_c__norank_p__SAR324_cladeMarine_group_B	f__norank_o__norank_c__norank_p__SAR324_cladeMarine_group_B	g__norank_f__norank_o__norank_c__norank_p__SAR324_cladeMarine_group_B	s__unclassified_g__norank_f__norank_o__norank_c__norank_p__SAR324_cladeMarine_group_B	OTU4223	0	1	0	0	0	0	2	1	0	2	0	0	0	0	0	0	0	0	0	1	7
d__Bacteria	k__norank_d__Bacteria	p__Gemmatimonadota	c__Gemmatimonadetes	o__Gemmatimonadales	f__Gemmatimonadaceae	g__Gemmatimonas	s__unclassified_g__Gemmatimonas	OTU1893	3	1	1	0	2	0	0	0	0	0	0	0	0	0	0	0	0	0	0	0	7
d__Bacteria	k__norank_d__Bacteria	p__Myxococcota	c__Polyangia	o__Polyangiales	f__Sandaracinaceae	g__norank_f__Sandaracinaceae	s__uncultured_soil_bacterium_g__norank_f__Sandaracinaceae	OTU1361	3	0	1	0	0	1	0	0	0	0	0	0	0	1	0	0	0	0	0	0	6
d__Bacteria	k__norank_d__Bacteria	p__Bacteroidota	c__Bacteroidia	o__Chitinophagales	f__Chitinophagaceae	g__Flavitalea	s__uncultured_bacterium_g__Flavitalea	OTU7236	4	1	3	2	2	1	3	2	1	1	0	0	0	1	0	0	0	1	1	0	23
d__Bacteria	k__norank_d__Bacteria	p__Patescibacteria	c__ABY1	o__Candidatus_Kuenenbacteria	f__norank_o__Candidatus_Kuenenbacteria	g__norank_f__norank_o__Candidatus_Kuenenbacteria	s__uncultured_bacterium_g__norank_f__norank_o__Candidatus_Kuenenbacteria	OTU7813	0	0	0	0	0	0	0	0	0	0	0	0	0	0	0	0	0	1	1	0	2
d__Bacteria	k__norank_d__Bacteria	p__Actinobacteriota	c__Coriobacteriia	o__Coriobacteriales	f__Atopobiaceae	g__Olsenella	s__Olsenella_umbonata	OTU8996	2	1	4	0	0	0	0	0	0	0	1	0	0	0	0	1	0	0	1	1	11
d__Bacteria	k__norank_d__Bacteria	p__Proteobacteria	c__Gammaproteobacteria	o__Legionellales	f__Legionellaceae	g__Legionella	s__Legionella_cardiaca	OTU8249	0	0	0	0	0	0	0	0	0	0	0	0	0	0	0	0	0	0	0	1	1
d__Bacteria	k__norank_d__Bacteria	p__Patescibacteria	c__CPR2	o__norank_c__CPR2	f__norank_o__norank_c__CPR2	g__norank_f__norank_o__norank_c__CPR2	s__uncultured_Clostridium_sp._g__norank_f__norank_o__norank	OTU2152	0	1	0	2	1	0	0	0	0	0	1	0	0	0	0	0	0	0	0	0	5
d__Bacteria	k__norank_d__Bacteria	p__Gemmatimonadota	c__Gemmatimonadetes	o__Gemmatimonadales	f__Gemmatimonadaceae	g__norank_f__Gemmatimonadaceae	s__uncultured_organism_g__norank_f__Gemmatimonadaceae	OTU9063	0	0	0	0	0	0	0	0	0	0	0	0	1	0	0	0	0	3	4	4	12
d__Bacteria	k__norank_d__Bacteria	p__Acidobacteriota	c__Holophagae	o__Subgroup_7	f__norank_o__Subgroup_7	g__norank_f__norank_o__Subgroup_7	s__uncultured_soil_bacterium_g__norank_f__norank_o__Subgroup_7	OTU3600	0	2	0	1	0	0	3	0	0	0	0	0	0	0	0	0	0	0	0	0	6
d__Bacteria	k__norank_d__Bacteria	p__Chloroflexi	c__Anaerolineae	o__RBG-13-54-9	f__norank_o__RBG-13-54-9	g__norank_f__norank_o__RBG-13-54-9	s__unclassified_g__norank_f__norank_o__RBG-13-54-9	OTU2346	0	0	0	0	0	8	0	0	0	0	0	0	0	0	0	0	0	0	0	0	8
d__Bacteria	k__norank_d__Bacteria	p__Sumerlaeota	c__Sumerlaeia	o__Sumerlaeales	f__Sumerlaeaceae	g__Sumerlaea	s__unclassified_g__Sumerlaea	OTU2000	0	0	0	0	1	0	0	0	0	0	1	1	0	0	0	0	0	0	0	0	3
d__Bacteria	k__norank_d__Bacteria	p__Actinobacteriota	c__Thermoleophilia	o__Gaiellales	f__norank_o__Gaiellales	g__norank_f__norank_o__Gaiellales	s__uncultured_bacterium_g__norank_f__norank_o__Gaiellales	OTU3210	0	0	0	0	0	5	1	1	0	0	0	0	0	0	0	0	0	0	0	0	7
d__Bacteria	k__norank_d__Bacteria	p__Chloroflexi	c__Chloroflexia	o__Thermomicrobiales	f__JG30-KF-CM45	g__norank_f__JG30-KF-CM45	s__uncultured_bacterium_g__norank_f__JG30-KF-CM45	OTU1102	5	7	2	5	4	9	4	0	0	4	0	0	0	0	0	0	0	0	0	0	40
d__Bacteria	k__norank_d__Bacteria	p__Proteobacteria	c__Alphaproteobacteria	o__Sphingomonadales	f__Sphingomonadaceae	g__Sphingomonas	s__unclassified_g__Sphingomonas	OTU1897	49	37	46	33	76	60	41	48	6	28	2	1	2	10	0	4	13	3	6	3	468
d__Bacteria	k__norank_d__Bacteria	p__Firmicutes	c__Desulfitobacteriia	o__Desulfitobacteriales	f__Desulfitobacteriaceae	g__Desulfosporosinus	s__uncultured_bacterium_g__Desulfosporosinus	OTU3825	0	0	0	1	0	1	0	0	1	0	0	0	0	0	0	0	0	0	0	1	4
d__Bacteria	k__norank_d__Bacteria	p__Bdellovibrionota	c__Oligoflexia	o__0319-6G20	f__norank_o__0319-6G20	g__norank_f__norank_o__0319-6G20	s__unclassified_g__norank_f__norank_o__0319-6G20	OTU150	2	0	0	0	0	1	0	1	0	0	0	0	0	0	0	0	1	0	0	0	5
d__Bacteria	k__norank_d__Bacteria	p__Chloroflexi	c__JG30-KF-CM66	o__norank_c__JG30-KF-CM66	f__norank_o__norank_c__JG30-KF-CM66	g__norank_f__norank_o__norank_c__JG30-KF-CM66	s__uncultured_bacterium_g__norank_f__norank_o__norank_c__JG30-KF-CM66	OTU2869	1	1	0	1	0	8	1	2	0	0	0	0	0	0	0	0	0	0	0	0	14
d__Bacteria	k__norank_d__Bacteria	p__Chloroflexi	c__Anaerolineae	o__Anaerolineales	f__Anaerolineaceae	g__norank_f__Anaerolineaceae	s__unclassified_g__norank_f__Anaerolineaceae	OTU4998	1	4	5	3	4	0	4	0	7	2	0	0	0	1	0	0	0	0	0	0	31
d__Bacteria	k__norank_d__Bacteria	p__Proteobacteria	c__Alphaproteobacteria	o__Tistrellales	f__Geminicoccaceae	g__Candidatus_Alysiosphaera	s__unclassified_g__Candidatus_Alysiosphaera	OTU3721	1	2	1	1	2	1	2	0	2	0	0	0	0	0	0	0	0	0	0	0	12
d__Bacteria	k__norank_d__Bacteria	p__Chloroflexi	c__JG30-KF-CM66	o__norank_c__JG30-KF-CM66	f__norank_o__norank_c__JG30-KF-CM66	g__norank_f__norank_o__norank_c__JG30-KF-CM66	s__uncultured_bacterium_g__norank_f__norank_o__norank_c__JG30-KF-CM66	OTU2867	1	0	1	0	0	11	0	0	0	0	0	0	0	0	0	0	0	0	0	0	13
d__Bacteria	k__norank_d__Bacteria	p__Acidobacteriota	c__Vicinamibacteria	o__Subgroup_17	f__norank_o__Subgroup_17	g__norank_f__norank_o__Subgroup_17	s__uncultured_bacterium_g__norank_f__norank_o__Subgroup_17	OTU4325	0	1	0	0	0	0	1	2	4	3	0	0	0	0	0	0	0	0	0	0	11
d__Bacteria	k__norank_d__Bacteria	p__Proteobacteria	c__Alphaproteobacteria	o__Rhodospirillales	f__norank_o__Rhodospirillales	g__norank_f__norank_o__Rhodospirillales	s__unclassified_g__norank_f__norank_o__Rhodospirillales	OTU8414	0	0	0	1	0	0	0	0	0	0	0	0	0	0	0	0	0	0	1	0	2
d__Bacteria	k__norank_d__Bacteria	p__Firmicutes	c__Negativicutes	o__Veillonellales-Selenomonadales	f__Veillonellaceae	g__Megasphaera	s__unclassified_g__Megasphaera	OTU6588	4	0	5	0	0	0	0	0	1	0	7	4	17	12	10	5	6	6	9	12	98
d__Bacteria	k__norank_d__Bacteria	p__Acidobacteriota	c__Thermoanaerobaculia	o__Thermoanaerobaculales	f__Thermoanaerobaculaceae	g__Subgroup_10	s__uncultured_bacterium_g__Subgroup_10	OTU4882	2	0	1	0	2	0	0	1	0	0	0	0	0	0	0	0	0	0	0	0	6
d__Bacteria	k__norank_d__Bacteria	p__Desulfobacterota	c__Desulfobulbia	o__Desulfobulbales	f__Desulfocapsaceae	g__unclassified_f__Desulfocapsaceae	s__unclassified_f__Desulfocapsaceae	OTU219	7	3	1	0	2	0	0	0	0	0	1	0	0	1	1	0	0	0	0	0	16
d__Bacteria	k__norank_d__Bacteria	p__Bacteroidota	c__Bacteroidia	o__Flavobacteriales	f__Weeksellaceae	g__Chryseobacterium	s__unclassified_g__Chryseobacterium	OTU8606	0	0	0	0	0	0	0	0	0	0	0	1	1	0	0	1	0	0	1	0	4
d__Bacteria	k__norank_d__Bacteria	p__Cyanobacteria	c__Cyanobacteriia	o__Cyanobacteriales	f__Oscillatoriaceae	g__Phormidium_ETS-05	s__unclassified_g__Phormidium_ETS-05	OTU7913	0	0	0	0	0	0	0	0	0	0	0	0	0	0	0	3	9	1	0	1	14
d__Bacteria	k__norank_d__Bacteria	p__Bacteroidota	c__Bacteroidia	o__Cytophagales	f__Microscillaceae	g__norank_f__Microscillaceae	s__uncultured_prokaryote_g__norank_f__Microscillaceae	OTU5946	5	2	4	1	0	0	1	5	0	3	1	0	0	0	0	0	0	2	2	3	29
d__Bacteria	k__norank_d__Bacteria	p__TA06	c__norank_p__TA06	o__norank_c__norank_p__TA06	f__norank_o__norank_c__norank_p__TA06	g__norank_f__norank_o__norank_c__norank_p__TA06	s__unclassified_g__norank_f__norank_o__norank_c__norank_p__TA06	OTU5301	0	1	0	0	0	0	0	0	3	0	0	0	0	0	0	0	0	0	0	0	4
d__Bacteria	k__norank_d__Bacteria	p__Acidobacteriota	c__Holophagae	o__Subgroup_7	f__norank_o__Subgroup_7	g__norank_f__norank_o__Subgroup_7	s__unclassified_g__norank_f__norank_o__Subgroup_7	OTU3521	0	0	0	0	0	0	1	0	1	0	0	0	0	0	0	0	0	0	0	0	2
d__Bacteria	k__norank_d__Bacteria	p__Planctomycetota	c__Phycisphaerae	o__Phycisphaerales	f__Phycisphaeraceae	g__SM1A02	s__unclassified_g__SM1A02	OTU7139	2	0	0	1	0	0	0	0	0	0	1	1	0	1	1	0	0	0	0	0	7
d__Bacteria	k__norank_d__Bacteria	p__GAL15	c__norank_p__GAL15	o__norank_c__norank_p__GAL15	f__norank_o__norank_c__norank_p__GAL15	g__norank_f__norank_o__norank_c__norank_p__GAL15	s__uncultured_bacterium_g__norank_f__norank_o__norank_c__norank_p__GAL15	OTU2950	0	0	1	0	0	12	0	0	0	0	0	0	0	0	0	0	0	0	0	0	13
d__Bacteria	k__norank_d__Bacteria	p__NB1-j	c__norank_p__NB1-j	o__norank_c__norank_p__NB1-j	f__norank_o__norank_c__norank_p__NB1-j	g__norank_f__norank_o__norank_c__norank_p__NB1-j	s__unclassified_g__norank_f__norank_o__norank_c__norank_p__NB1-j	OTU2383	0	0	0	0	0	1	0	0	0	0	0	0	0	0	0	0	0	0	0	0	1
d__Bacteria	k__norank_d__Bacteria	p__Actinobacteriota	c__Actinobacteria	o__Frankiales	f__Sporichthyaceae	g__hgcI_clade	s__uncultured_bacterium_g__hgcI_clade	OTU7414	0	0	0	0	0	0	0	0	0	0	33	46	32	33	42	20	13	25	22	28	294
d__Bacteria	k__norank_d__Bacteria	p__Planctomycetota	c__Planctomycetes	o__Gemmatales	f__Gemmataceae	g__norank_f__Gemmataceae	s__unclassified_g__norank_f__Gemmataceae	OTU3979	1	0	0	0	0	0	0	0	0	0	0	0	0	0	0	0	0	0	0	0	1
d__Bacteria	k__norank_d__Bacteria	p__Proteobacteria	c__Gammaproteobacteria	o__Burkholderiales	f__Rhodocyclaceae	g__norank_f__Rhodocyclaceae	s__uncultured_Azospira_sp._g__norank	OTU8126	0	0	0	0	0	0	0	0	0	0	0	1	0	0	0	0	0	0	0	1	2
d__Bacteria	k__norank_d__Bacteria	p__Bacteroidota	c__Bacteroidia	o__Bacteroidales	f__Prevotellaceae	g__Prevotella	s__unclassified_g__Prevotella	OTU7211	0	0	0	0	1	0	0	0	0	0	0	1	1	2	0	1	0	1	0	2	9
d__Bacteria	k__norank_d__Bacteria	p__Actinobacteriota	c__Rubrobacteria	o__Rubrobacterales	f__Rubrobacteriaceae	g__Rubrobacter	s__uncultured_bacterium_g__Rubrobacter	OTU2155	1	4	1	2	2	1	1	2	0	4	0	0	0	3	0	1	3	0	0	2	27
d__Bacteria	k__norank_d__Bacteria	p__Actinobacteriota	c__Thermoleophilia	o__Solirubrobacterales	f__67-14	g__norank_f__67-14	s__unclassified_g__norank_f__67-14	OTU6738	0	0	0	0	0	0	0	0	0	0	2	3	2	6	4	1	1	1	1	2	23
d__Bacteria	k__norank_d__Bacteria	p__Chloroflexi	c__Chloroflexia	o__Thermomicrobiales	f__JG30-KF-CM45	g__norank_f__JG30-KF-CM45	s__unclassified_g__norank_f__JG30-KF-CM45	OTU2086	59	43	79	53	49	120	46	102	28	46	5	3	2	7	1	0	1	0	2	5	651
d__Bacteria	k__norank_d__Bacteria	p__Chloroflexi	c__Anaerolineae	o__Anaerolineales	f__Anaerolineaceae	g__norank_f__Anaerolineaceae	s__uncultured_Chloroflexi_bacterium_g__norank_f__Anaerolineaceae	OTU2534	0	1	1	0	1	2	1	0	1	0	0	0	0	0	0	0	0	0	0	0	7
d__Bacteria	k__norank_d__Bacteria	p__Desulfobacterota	c__Syntrophorhabdia	o__Syntrophorhabdales	f__Syntrophorhabdaceae	g__Syntrophorhabdus	s__uncultured_bacterium_g__Syntrophorhabdus	OTU2073	0	0	1	0	2	0	4	0	3	1	0	0	0	0	0	1	0	0	0	0	12
d__Bacteria	k__norank_d__Bacteria	p__Acidobacteriota	c__Blastocatellia	o__Pyrinomonadales	f__Pyrinomonadaceae	g__RB41	s__uncultured_soil_bacterium_g__RB41	OTU220	22	3	1	0	1	7	6	1	1	1	0	0	0	1	0	0	0	0	0	0	44
d__Bacteria	k__norank_d__Bacteria	p__Acidobacteriota	c__Vicinamibacteria	o__Vicinamibacterales	f__Vicinamibacteraceae	g__Luteitalea	s__unclassified_g__Luteitalea	OTU384	14	5	7	0	4	16	4	3	0	6	0	1	0	0	1	0	0	0	0	0	61
d__Bacteria	k__norank_d__Bacteria	p__Desulfobacterota	c__Desulfobulbia	o__Desulfobulbales	f__Desulfocapsaceae	g__Desulfoprunum	s__uncultured_bacterium_g__Desulfoprunum	OTU4284	53	105	119	89	64	14	55	41	13	109	3	3	3	5	4	0	1	0	1	3	685
d__Bacteria	k__norank_d__Bacteria	p__Proteobacteria	c__Gammaproteobacteria	o__unclassified_c__Gammaproteobacteria	f__unclassified_c__Gammaproteobacteria	g__unclassified_c__Gammaproteobacteria	s__unclassified_c__Gammaproteobacteria	OTU6186	0	1	0	0	0	0	0	4	4	3	0	0	0	0	0	0	0	0	0	0	12
d__Bacteria	k__norank_d__Bacteria	p__Nitrospirota	c__Thermodesulfovibrionia	o__norank_c__Thermodesulfovibrionia	f__norank_o__norank_c__Thermodesulfovibrionia	g__norank_f__norank_o__norank_c__Thermodesulfovibrionia	s__unclassified_g__norank_f__norank_o__norank_c__Thermodesulfovibrionia	OTU6472	0	1	0	0	2	2	0	1	0	2	0	0	0	0	0	0	0	0	0	0	8
d__Bacteria	k__norank_d__Bacteria	p__Cyanobacteria	c__Sericytochromatia	o__norank_c__Sericytochromatia	f__norank_o__norank_c__Sericytochromatia	g__norank_f__norank_o__norank_c__Sericytochromatia	s__unclassified_g__norank_f__norank_o__norank_c__Sericytochromatia	OTU4366	1	0	0	0	0	0	0	0	0	0	0	0	0	0	0	0	2	0	1	1	5
d__Bacteria	k__norank_d__Bacteria	p__Proteobacteria	c__Alphaproteobacteria	o__Rhodospirillales	f__norank_o__Rhodospirillales	g__norank_f__norank_o__Rhodospirillales	s__unclassified_g__norank_f__norank_o__Rhodospirillales	OTU7023	0	0	0	0	0	0	0	0	0	0	1	0	1	0	0	0	1	0	0	0	3
d__Bacteria	k__norank_d__Bacteria	p__Chloroflexi	c__Ktedonobacteria	o__MVP-21	f__norank_o__MVP-21	g__norank_f__norank_o__MVP-21	s__uncultured_bacterium_g__norank_f__norank_o__MVP-21	OTU4782	0	0	0	0	0	0	0	1	0	1	0	0	0	0	0	0	0	0	1	0	3
d__Bacteria	k__norank_d__Bacteria	p__Proteobacteria	c__Alphaproteobacteria	o__Rhizobiales	f__Xanthobacteraceae	g__Bradyrhizobium	s__Bradyrhizobium_elkanii_g__Bradyrhizobium	OTU3504	84	61	50	59	136	102	53	59	16	60	4	0	1	6	2	2	2	2	4	1	704
d__Bacteria	k__norank_d__Bacteria	p__Chloroflexi	c__NLS2-31	o__norank_c__NLS2-31	f__norank_o__norank_c__NLS2-31	g__norank_f__norank_o__norank_c__NLS2-31	s__uncultured_bacterium_g__norank_f__norank_o__norank_c__NLS2-31	OTU2448	0	0	0	0	0	2	0	0	0	0	0	0	0	0	0	0	0	0	0	0	2
d__Bacteria	k__norank_d__Bacteria	p__Firmicutes	c__Bacilli	o__Paenibacillales	f__Paenibacillaceae	g__Paenibacillus	s__Paenibacillus_agarexedens	OTU1842	2	1	1	0	1	6	2	3	3	0	0	0	0	0	0	0	0	0	0	0	19
d__Bacteria	k__norank_d__Bacteria	p__Proteobacteria	c__Gammaproteobacteria	o__Burkholderiales	f__unclassified_o__Burkholderiales	g__unclassified_o__Burkholderiales	s__unclassified_o__Burkholderiales	OTU5822	0	0	0	0	0	0	1	0	0	1	0	0	0	0	0	0	0	0	0	0	2
d__Bacteria	k__norank_d__Bacteria	p__Bacteroidota	c__Bacteroidia	o__Bacteroidales	f__SB-5	g__norank_f__SB-5	s__unclassified_g__norank_f__SB-5	OTU6506	0	0	0	0	0	0	0	0	0	2	0	0	0	0	0	0	0	0	0	0	2
d__Bacteria	k__norank_d__Bacteria	p__Bacteroidota	c__Ignavibacteria	o__Ignavibacteriales	f__LD-RB-34	g__norank_f__LD-RB-34	s__uncultured_bacterium_g__norank_f__LD-RB-34	OTU5102	0	1	13	6	10	2	1	7	5	8	0	0	0	0	0	0	0	0	0	0	53
d__Bacteria	k__norank_d__Bacteria	p__Patescibacteria	c__Saccharimonadia	o__Saccharimonadales	f__norank_o__Saccharimonadales	g__norank_f__norank_o__Saccharimonadales	s__unclassified_g__norank_f__norank_o__Saccharimonadales	OTU8953	0	0	1	0	1	0	0	0	0	0	1	0	1	0	0	1	0	1	0	1	7
d__Bacteria	k__norank_d__Bacteria	p__Patescibacteria	c__Saccharimonadia	o__Saccharimonadales	f__norank_o__Saccharimonadales	g__norank_f__norank_o__Saccharimonadales	s__uncultured_bacterium_SBR2113	OTU6699	0	0	0	0	0	0	0	0	0	0	1	0	0	0	1	0	0	0	0	0	2
d__Bacteria	k__norank_d__Bacteria	p__Myxococcota	c__Polyangia	o__Polyangiales	f__Sandaracinaceae	g__norank_f__Sandaracinaceae	s__unclassified_g__norank_f__Sandaracinaceae	OTU1598	0	0	0	2	0	0	1	0	0	0	0	0	0	0	0	0	0	1	2	0	6
d__Bacteria	k__norank_d__Bacteria	p__Planctomycetota	c__Pla4_lineage	o__norank_c__Pla4_lineage	f__norank_o__norank_c__Pla4_lineage	g__norank_f__norank_o__norank_c__Pla4_lineage	s__unclassified_g__norank_f__norank_o__norank_c__Pla4_lineage	OTU3514	2	0	0	0	0	1	1	0	0	0	0	0	0	0	0	0	0	0	0	0	4
d__Bacteria	k__norank_d__Bacteria	p__Proteobacteria	c__Alphaproteobacteria	o__Puniceispirillales	f__Puniceispirillales_Incertae_Sedis	g__Constrictibacter	s__uncultured_soil_bacterium_g__Constrictibacter	OTU6448	0	0	0	0	0	0	0	0	0	2	0	0	0	1	0	0	0	0	0	0	3
d__Bacteria	k__norank_d__Bacteria	p__Cyanobacteria	c__Cyanobacteriia	o__Chloroplast	f__norank_o__Chloroplast	g__norank_f__norank_o__Chloroplast	s__unclassified_g__norank_f__norank_o__Chloroplast	OTU6942	0	0	0	0	0	0	0	0	0	0	2	2	0	0	0	1	0	0	0	0	5
d__Bacteria	k__norank_d__Bacteria	p__Chloroflexi	c__OLB14	o__norank_c__OLB14	f__norank_o__norank_c__OLB14	g__norank_f__norank_o__norank_c__OLB14	s__unclassified_g__norank_f__norank_o__norank_c__OLB14	OTU3677	0	0	0	0	3	0	1	1	0	0	0	0	0	0	0	0	0	0	0	0	5
d__Bacteria	k__norank_d__Bacteria	p__Proteobacteria	c__Gammaproteobacteria	o__Xanthomonadales	f__Xanthomonadaceae	g__Stenotrophomonas	s__unclassified_g__Stenotrophomonas	OTU8295	0	0	0	0	1	0	0	0	0	0	0	0	0	0	0	1	1	2	7	1	13
d__Bacteria	k__norank_d__Bacteria	p__unclassified_k__norank_d__Bacteria	c__unclassified_k__norank_d__Bacteria	o__unclassified_k__norank_d__Bacteria	f__unclassified_k__norank_d__Bacteria	g__unclassified_k__norank_d__Bacteria	s__unclassified_k__norank_d__Bacteria	OTU8841	1	0	0	2	0	0	1	0	0	0	0	1	0	0	0	1	0	0	0	1	7
d__Bacteria	k__norank_d__Bacteria	p__Proteobacteria	c__Alphaproteobacteria	o__Rhizobiales	f__Rhizobiales_Incertae_Sedis	g__Phreatobacter	s__uncultured_bacterium_g__Phreatobacter	OTU7484	0	1	0	2	2	0	0	2	0	0	0	0	0	0	0	5	6	3	1	1	23
d__Bacteria	k__norank_d__Bacteria	p__Proteobacteria	c__Gammaproteobacteria	o__Cellvibrionales	f__Spongiibacteraceae	g__BD1-7_clade	s__metagenome_g__BD1-7_clade	OTU6528	128	296	165	379	142	41	319	143	473	185	42	41	26	40	20	23	11	13	16	12	2515
d__Bacteria	k__norank_d__Bacteria	p__Firmicutes	c__Clostridia	o__norank_c__Clostridia	f__Hungateiclostridiaceae	g__Pseudobacteroides	s__unclassified_g__Pseudobacteroides	OTU1516	0	0	0	1	0	0	0	0	0	0	0	0	0	1	0	0	0	0	0	0	2
d__Bacteria	k__norank_d__Bacteria	p__Chloroflexi	c__OLB14	o__norank_c__OLB14	f__norank_o__norank_c__OLB14	g__norank_f__norank_o__norank_c__OLB14	s__unclassified_g__norank_f__norank_o__norank_c__OLB14	OTU1694	0	0	1	0	1	0	1	0	0	0	0	0	0	0	0	0	1	0	0	0	4
d__Bacteria	k__norank_d__Bacteria	p__Acidobacteriota	c__Subgroup_22	o__norank_c__Subgroup_22	f__norank_o__norank_c__Subgroup_22	g__norank_f__norank_o__norank_c__Subgroup_22	s__uncultured_bacterium_g__norank_f__norank_o__norank_c__Subgroup_22	OTU4524	0	0	0	0	0	0	0	1	1	0	0	0	0	0	0	0	0	0	0	0	2
d__Bacteria	k__norank_d__Bacteria	p__Chloroflexi	c__Anaerolineae	o__Anaerolineales	f__Anaerolineaceae	g__Ornatilinea	s__uncultured_Chloroflexi_bacterium_g__Ornatilinea	OTU793	0	1	0	0	0	0	0	0	1	0	0	0	0	0	0	0	0	0	0	0	2
d__Bacteria	k__norank_d__Bacteria	p__Sumerlaeota	c__Sumerlaeia	o__norank_c__Sumerlaeia	f__norank_o__norank_c__Sumerlaeia	g__norank_f__norank_o__norank_c__Sumerlaeia	s__uncultured_organism_g__norank_f__norank_o__norank_c__Sumerlaeia	OTU1921	0	0	0	0	3	0	0	0	0	0	0	0	0	0	0	0	0	0	0	0	3
d__Bacteria	k__norank_d__Bacteria	p__Proteobacteria	c__Alphaproteobacteria	o__Rhizobiales	f__unclassified_o__Rhizobiales	g__unclassified_o__Rhizobiales	s__unclassified_o__Rhizobiales	OTU9068	0	0	0	0	0	0	0	0	0	0	0	0	0	0	0	0	0	0	0	6	6
d__Bacteria	k__norank_d__Bacteria	p__Planctomycetota	c__OM190	o__norank_c__OM190	f__norank_o__norank_c__OM190	g__norank_f__norank_o__norank_c__OM190	s__uncultured_bacterium_g__norank_f__norank_o__norank_c__OM190	OTU117	7	1	2	0	1	0	0	0	0	1	0	1	0	0	0	0	0	0	0	0	13
d__Bacteria	k__norank_d__Bacteria	p__Spirochaetota	c__Spirochaetia	o__Spirochaetales	f__Spirochaetaceae	g__Spirochaeta	s__uncultured_bacterium_g__Spirochaeta	OTU1828	0	0	0	0	1	0	0	0	3	0	0	0	0	0	0	0	0	0	0	0	4
d__Bacteria	k__norank_d__Bacteria	p__Proteobacteria	c__Gammaproteobacteria	o__Burkholderiales	f__Rhodocyclaceae	g__unclassified_f__Rhodocyclaceae	s__unclassified_f__Rhodocyclaceae	OTU121	1	0	1	2	0	0	0	0	0	0	0	0	0	0	0	0	0	0	0	0	4
d__Bacteria	k__norank_d__Bacteria	p__Firmicutes	c__Bacilli	o__Bacillales	f__Planococcaceae	g__Paenisporosarcina	s__Paenisporosarcina_sp._K2R23-3	OTU2923	0	0	0	0	0	0	0	0	0	0	1	0	0	0	0	1	0	1	0	0	3
d__Bacteria	k__norank_d__Bacteria	p__Planctomycetota	c__OM190	o__norank_c__OM190	f__norank_o__norank_c__OM190	g__norank_f__norank_o__norank_c__OM190	s__uncultured_bacterium_g__norank_f__norank_o__norank_c__OM190	OTU444	1	1	0	1	1	0	0	0	0	0	0	0	0	0	0	0	0	0	0	0	4
d__Bacteria	k__norank_d__Bacteria	p__Proteobacteria	c__Alphaproteobacteria	o__Rhizobiales	f__Rhizobiaceae	g__Allorhizobium-Neorhizobium-Pararhizobium-Rhizobium	s__unclassified_g__Allorhizobium-Neorhizobium-Pararhizobium-Rhizobium	OTU759	55	163	250	125	126	78	26	66	0	55	3	8	6	9	8	23	20	10	20	25	1076
d__Bacteria	k__norank_d__Bacteria	p__unclassified_k__norank_d__Bacteria	c__unclassified_k__norank_d__Bacteria	o__unclassified_k__norank_d__Bacteria	f__unclassified_k__norank_d__Bacteria	g__unclassified_k__norank_d__Bacteria	s__unclassified_k__norank_d__Bacteria	OTU8901	0	0	4	0	1	0	0	1	0	3	0	0	0	0	0	0	0	0	0	2	11
d__Bacteria	k__norank_d__Bacteria	p__Patescibacteria	c__Saccharimonadia	o__Saccharimonadales	f__norank_o__Saccharimonadales	g__norank_f__norank_o__Saccharimonadales	s__uncultured_bacterium_SBR2060	OTU1077	0	0	8	3	0	0	0	0	0	0	0	0	0	0	0	0	0	0	0	0	11
d__Bacteria	k__norank_d__Bacteria	p__Chloroflexi	c__Anaerolineae	o__SBR1031	f__norank_o__SBR1031	g__norank_f__norank_o__SBR1031	s__terrestrial_metagenome_g__norank_f__norank	OTU3245	2	4	2	3	5	0	5	2	4	2	0	0	0	0	0	0	0	0	0	0	29
d__Bacteria	k__norank_d__Bacteria	p__Bacteroidota	c__Kryptonia	o__Kryptoniales	f__MSB-3C8	g__norank_f__MSB-3C8	s__unclassified_g__norank_f__MSB-3C8	OTU1365	0	1	1	1	0	0	0	1	0	0	0	0	0	0	0	0	0	0	0	1	5
d__Bacteria	k__norank_d__Bacteria	p__Bacteroidota	c__Bacteroidia	o__Sphingobacteriales	f__Sphingobacteriaceae	g__Pedobacter	s__Pedobacter_glucosidilyticus	OTU7376	0	0	0	0	0	0	0	0	0	0	0	0	0	1	2	0	1	1	3	1	9
d__Bacteria	k__norank_d__Bacteria	p__Proteobacteria	c__Gammaproteobacteria	o__Burkholderiales	f__unclassified_o__Burkholderiales	g__unclassified_o__Burkholderiales	s__unclassified_o__Burkholderiales	OTU2849	1	0	0	0	0	1	0	1	0	0	0	0	0	0	0	0	0	0	0	0	3
d__Bacteria	k__norank_d__Bacteria	p__Chloroflexi	c__TK10	o__norank_c__TK10	f__norank_o__norank_c__TK10	g__norank_f__norank_o__norank_c__TK10	s__unclassified_g__norank_f__norank_o__norank_c__TK10	OTU3895	1	0	0	1	0	1	0	0	0	0	0	0	0	0	0	0	0	0	0	0	3
d__Bacteria	k__norank_d__Bacteria	p__Chloroflexi	c__Anaerolineae	o__SBR1031	f__norank_o__SBR1031	g__norank_f__norank_o__SBR1031	s__uncultured_bacterium_g__norank_f__norank_o__SBR1031	OTU5849	0	1	5	0	0	0	9	10	2	7	0	0	0	0	0	0	0	0	0	0	34
d__Bacteria	k__norank_d__Bacteria	p__SAR324_cladeMarine_group_B	c__norank_p__SAR324_cladeMarine_group_B	o__norank_c__norank_p__SAR324_cladeMarine_group_B	f__norank_o__norank_c__norank_p__SAR324_cladeMarine_group_B	g__norank_f__norank_o__norank_c__norank_p__SAR324_cladeMarine_group_B	s__uncultured_soil_bacterium_g__norank_f__norank_o__norank_c__norank_p__SAR324_cladeMarine_group_B	OTU6171	0	1	0	0	0	0	5	0	0	0	1	0	0	0	0	0	0	0	0	0	7
d__Bacteria	k__norank_d__Bacteria	p__Proteobacteria	c__Alphaproteobacteria	o__Rickettsiales	f__Mitochondria	g__norank_f__Mitochondria	s__metagenome_g__norank_f__Mitochondria	OTU6682	0	0	0	0	0	0	0	0	0	0	1	0	2	0	0	0	2	0	0	1	6
d__Bacteria	k__norank_d__Bacteria	p__Bacteroidota	c__Bacteroidia	o__Bacteroidales	f__Prolixibacteraceae	g__BSV13	s__uncultured_bacterium_g__BSV13	OTU780	2	22	2	17	0	0	2	0	0	1	3	4	6	3	8	0	0	1	1	0	72
d__Bacteria	k__norank_d__Bacteria	p__Modulibacteria	c__Moduliflexia	o__Moduliflexales	f__Moduliflexaceae	g__norank_f__Moduliflexaceae	s__unclassified_g__norank_f__Moduliflexaceae	OTU5593	0	0	0	0	0	0	0	1	3	0	0	1	0	0	0	0	0	0	0	0	5
d__Bacteria	k__norank_d__Bacteria	p__Patescibacteria	c__Gracilibacteria	o__norank_c__Gracilibacteria	f__norank_o__norank_c__Gracilibacteria	g__norank_f__norank_o__norank_c__Gracilibacteria	s__uncultured_organism_g__norank_f__norank_o__norank_c__Gracilibacteria	OTU6121	0	1	0	0	0	0	0	1	0	2	0	0	0	0	0	0	0	0	0	0	4
d__Bacteria	k__norank_d__Bacteria	p__Acidobacteriota	c__Aminicenantia	o__Aminicenantales	f__norank_o__Aminicenantales	g__norank_f__norank_o__Aminicenantales	s__uncultured_bacterium_g__norank_f__norank_o__Aminicenantales	OTU4689	0	0	0	0	0	0	0	1	2	0	0	0	0	0	0	0	0	0	0	0	3
d__Bacteria	k__norank_d__Bacteria	p__Firmicutes	c__Clostridia	o__norank_c__Clostridia	f__Gracilibacteraceae	g__Gracilibacter	s__uncultured_Gracilibacter_sp.	OTU2696	1	0	1	0	1	72	5	2	20	3	0	0	0	0	0	0	1	0	1	0	107
d__Bacteria	k__norank_d__Bacteria	p__Bacteroidota	c__Bacteroidia	o__Sphingobacteriales	f__AKYH767	g__norank_f__AKYH767	s__uncultured_bacterium_g__norank_f__AKYH767	OTU4036	3	1	0	0	3	3	0	0	0	0	0	0	0	0	0	0	0	0	0	0	10
d__Bacteria	k__norank_d__Bacteria	p__Deinococcota	c__Deinococci	o__Deinococcales	f__Deinococcaceae	g__Deinococcus	s__unclassified_g__Deinococcus	OTU4529	2	1	0	0	0	0	0	2	0	0	0	0	0	0	1	0	2	0	0	1	9
d__Bacteria	k__norank_d__Bacteria	p__Firmicutes	c__Clostridia	o__Lachnospirales	f__unclassified_o__Lachnospirales	g__unclassified_o__Lachnospirales	s__unclassified_o__Lachnospirales	OTU2372	0	0	0	0	0	32	2	1	0	1	0	0	0	0	0	0	0	0	0	0	36
d__Bacteria	k__norank_d__Bacteria	p__Proteobacteria	c__Gammaproteobacteria	o__Diplorickettsiales	f__Diplorickettsiaceae	g__norank_f__Diplorickettsiaceae	s__uncultured_bacterium_g__norank_f__Diplorickettsiaceae	OTU6447	0	0	0	0	0	0	0	1	0	0	0	0	0	0	0	0	0	0	0	0	1
d__Bacteria	k__norank_d__Bacteria	p__Chloroflexi	c__Anaerolineae	o__Anaerolineales	f__Anaerolineaceae	g__Anaerolinea	s__uncultured_soil_bacterium_g__Anaerolinea	OTU410	8	3	2	2	2	2	4	0	1	0	1	0	0	0	0	0	0	0	0	0	25
d__Bacteria	k__norank_d__Bacteria	p__Verrucomicrobiota	c__Kiritimatiellae	o__WCHB1-41	f__norank_o__WCHB1-41	g__norank_f__norank_o__WCHB1-41	s__unclassified_g__norank_f__norank_o__WCHB1-41	OTU6849	1	0	0	0	0	0	0	0	0	2	0	2	0	2	0	0	0	0	0	0	7
d__Bacteria	k__norank_d__Bacteria	p__Acidobacteriota	c__Subgroup_22	o__norank_c__Subgroup_22	f__norank_o__norank_c__Subgroup_22	g__norank_f__norank_o__norank_c__Subgroup_22	s__unclassified_g__norank_f__norank_o__norank_c__Subgroup_22	OTU5717	0	0	0	0	3	0	1	2	2	2	0	0	0	0	0	0	0	0	0	0	10
d__Bacteria	k__norank_d__Bacteria	p__Bacteroidota	c__Bacteroidia	o__Cytophagales	f__Spirosomaceae	g__Lacihabitans	s__uncultured_bacterium_g__Lacihabitans	OTU7798	0	0	0	1	8	0	0	0	0	0	0	1	0	2	2	11	5	1	3	4	38
d__Bacteria	k__norank_d__Bacteria	p__Desulfobacterota	c__Desulfobacteria	o__Desulfobacterales	f__Desulfosarcinaceae	g__Sva0081_sediment_group	s__unclassified_g__Sva0081_sediment_group	OTU1644	0	3	1	5	1	0	1	2	2	2	0	0	0	0	0	0	0	0	1	0	18
d__Bacteria	k__norank_d__Bacteria	p__Patescibacteria	c__ABY1	o__Candidatus_Falkowbacteria	f__norank_o__Candidatus_Falkowbacteria	g__norank_f__norank_o__Candidatus_Falkowbacteria	s__unclassified_g__norank_f__norank_o__Candidatus_Falkowbacteria	OTU7324	0	0	0	0	0	0	0	0	0	0	0	0	0	0	1	0	0	0	0	0	1
d__Bacteria	k__norank_d__Bacteria	p__Bacteroidota	c__Bacteroidia	o__Sphingobacteriales	f__Lentimicrobiaceae	g__norank_f__Lentimicrobiaceae	s__unclassified_g__norank_f__Lentimicrobiaceae	OTU497	1	20	3	9	1	0	9	0	6	15	0	2	1	1	0	1	1	0	0	0	70
d__Bacteria	k__norank_d__Bacteria	p__Campilobacterota	c__Campylobacteria	o__Campylobacterales	f__unclassified_o__Campylobacterales	g__unclassified_o__Campylobacterales	s__unclassified_o__Campylobacterales	OTU4897	0	0	0	0	0	0	0	1	0	0	1	0	0	0	0	0	0	3	2	2	9
d__Bacteria	k__norank_d__Bacteria	p__Acidobacteriota	c__Blastocatellia	o__11-24	f__norank_o__11-24	g__norank_f__norank_o__11-24	s__unclassified_g__norank_f__norank_o__11-24	OTU3050	1	0	0	1	0	4	5	3	0	1	0	0	1	1	0	0	0	0	0	0	17
d__Bacteria	k__norank_d__Bacteria	p__Myxococcota	c__Polyangia	o__Polyangiales	f__Sandaracinaceae	g__norank_f__Sandaracinaceae	s__uncultured_Polyangiaceae_bacterium_g__norank_f__Sandaracinaceae	OTU2664	6	0	1	0	0	1	0	0	0	0	0	0	0	0	0	0	0	0	0	0	8
d__Bacteria	k__norank_d__Bacteria	p__Chloroflexi	c__Anaerolineae	o__SBR1031	f__norank_o__SBR1031	g__norank_f__norank_o__SBR1031	s__unclassified_g__norank_f__norank_o__SBR1031	OTU3384	0	1	1	1	2	28	6	1	3	2	0	0	0	0	0	0	0	0	0	0	45
d__Bacteria	k__norank_d__Bacteria	p__Acidobacteriota	c__Vicinamibacteria	o__Vicinamibacterales	f__norank_o__Vicinamibacterales	g__norank_f__norank_o__Vicinamibacterales	s__unclassified_g__norank_f__norank_o__Vicinamibacterales	OTU208	12	5	1	2	3	25	6	1	1	1	0	0	0	4	0	1	0	0	0	0	62
d__Bacteria	k__norank_d__Bacteria	p__Actinobacteriota	c__Actinobacteria	o__Streptomycetales	f__Streptomycetaceae	g__Streptomyces	s__unclassified_g__Streptomyces	OTU8267	23	7	22	8	12	65	25	18	36	9	0	2	1	6	1	1	6	1	7	1	251
d__Bacteria	k__norank_d__Bacteria	p__Cyanobacteria	c__Cyanobacteriia	o__Chloroplast	f__norank_o__Chloroplast	g__norank_f__norank_o__Chloroplast	s__Kirchneriella_aperta	OTU8030	1	0	0	0	0	0	0	0	0	0	4	2	0	0	4	0	2	2	9	2	26
d__Bacteria	k__norank_d__Bacteria	p__Proteobacteria	c__Alphaproteobacteria	o__Acetobacterales	f__Acetobacteraceae	g__Craurococcus-Caldovatus	s__Acetobacteraceae_bacterium_g__Craurococcus-Caldovatus	OTU1005	0	2	1	0	1	0	0	0	1	0	0	0	0	0	0	0	0	0	0	0	5
d__Bacteria	k__norank_d__Bacteria	p__Bacteroidota	c__Bacteroidia	o__Sphingobacteriales	f__NS11-12_marine_group	g__norank_f__NS11-12_marine_group	s__uncultured_bacterium_g__norank_f__NS11-12_marine_group	OTU8423	0	0	0	0	0	0	0	0	0	0	0	1	0	0	2	0	0	1	2	1	7
d__Bacteria	k__norank_d__Bacteria	p__Desulfobacterota	c__Syntrophobacteria	o__Syntrophobacterales	f__Syntrophobacteraceae	g__Desulfovirga	s__uncultured_bacterium_g__Desulfovirga	OTU4854	0	0	0	0	0	0	0	0	1	0	0	0	0	0	0	0	0	0	0	0	1
d__Bacteria	k__norank_d__Bacteria	p__Verrucomicrobiota	c__Chlamydiae	o__Chlamydiales	f__cvE6	g__norank_f__cvE6	s__uncultured_bacterium_g__norank_f__cvE6	OTU349	2	0	0	0	0	0	0	0	0	0	1	0	0	0	1	0	1	0	0	0	5
d__Bacteria	k__norank_d__Bacteria	p__Firmicutes	c__Negativicutes	o__Veillonellales-Selenomonadales	f__Selenomonadaceae	g__norank_f__Selenomonadaceae	s__unclassified_g__norank_f__Selenomonadaceae	OTU7333	0	0	0	0	0	0	0	0	0	0	0	0	0	0	1	0	0	1	0	1	3
d__Bacteria	k__norank_d__Bacteria	p__Cyanobacteria	c__Cyanobacteriia	o__Chloroplast	f__norank_o__Chloroplast	g__norank_f__norank_o__Chloroplast	s__unclassified_g__norank_f__norank_o__Chloroplast	OTU4377	0	0	0	0	0	0	1	39	0	0	0	0	0	0	0	3	2	10	1	0	56
d__Bacteria	k__norank_d__Bacteria	p__Planctomycetota	c__Planctomycetes	o__Gemmatales	f__Gemmataceae	g__norank_f__Gemmataceae	s__bacterium_enrichment_culture_clone_B1452011	OTU7033	0	0	0	0	0	0	0	0	0	0	6	3	3	1	5	0	1	2	0	0	21
d__Bacteria	k__norank_d__Bacteria	p__Verrucomicrobiota	c__Chlamydiae	o__Chlamydiales	f__Simkaniaceae	g__Candidatus_Renichlamydia	s__uncultured_Candidatus_Rhabdochlamydia_sp._g__Candidatus_Renichlamydia	OTU7263	0	0	0	0	0	0	0	0	0	0	0	0	0	0	0	1	0	0	0	0	1
d__Bacteria	k__norank_d__Bacteria	p__Chloroflexi	c__Anaerolineae	o__unclassified_c__Anaerolineae	f__unclassified_c__Anaerolineae	g__unclassified_c__Anaerolineae	s__unclassified_c__Anaerolineae	OTU5568	0	0	0	0	0	0	0	1	1	0	0	0	0	0	0	0	0	0	0	0	2
d__Bacteria	k__norank_d__Bacteria	p__Cyanobacteria	c__Cyanobacteriia	o__Chloroplast	f__norank_o__Chloroplast	g__norank_f__norank_o__Chloroplast	s__unclassified_g__norank_f__norank_o__Chloroplast	OTU7303	0	0	0	0	0	0	0	0	0	0	0	2	0	0	1	0	0	1	0	0	4
d__Bacteria	k__norank_d__Bacteria	p__unclassified_k__norank_d__Bacteria	c__unclassified_k__norank_d__Bacteria	o__unclassified_k__norank_d__Bacteria	f__unclassified_k__norank_d__Bacteria	g__unclassified_k__norank_d__Bacteria	s__unclassified_k__norank_d__Bacteria	OTU4907	0	0	0	0	0	0	0	0	0	0	0	0	0	0	0	0	0	3	1	1	5
d__Bacteria	k__norank_d__Bacteria	p__Firmicutes	c__Clostridia	o__norank_c__Clostridia	f__Hungateiclostridiaceae	g__Ruminiclostridium	s__unclassified_g__Ruminiclostridium	OTU3047	0	42	9	37	3	46	2	2	7	4	1	0	0	0	0	0	0	0	0	1	154
d__Bacteria	k__norank_d__Bacteria	p__Proteobacteria	c__Alphaproteobacteria	o__Rhodobacterales	f__Rhodobacteraceae	g__Gemmobacter	s__uncultured_bacterium_g__Gemmobacter	OTU472	23	78	30	39	44	3	28	17	23	9	4	4	5	12	3	27	15	38	25	27	454
d__Bacteria	k__norank_d__Bacteria	p__Proteobacteria	c__Gammaproteobacteria	o__B2M28	f__norank_o__B2M28	g__norank_f__norank_o__B2M28	s__uncultured_gamma_proteobacterium_g__norank_f__norank_o__B2M28	OTU2446	0	0	0	0	2	2	3	0	0	0	0	0	0	0	0	0	0	0	0	0	7
d__Bacteria	k__norank_d__Bacteria	p__Patescibacteria	c__Saccharimonadia	o__Saccharimonadales	f__norank_o__Saccharimonadales	g__norank_f__norank_o__Saccharimonadales	s__uncultured_bacterium_SBR2013	OTU1182	0	0	2	0	0	0	0	0	0	1	0	0	0	0	0	0	0	0	0	0	3
d__Bacteria	k__norank_d__Bacteria	p__Chloroflexi	c__Anaerolineae	o__RBG-13-54-9	f__norank_o__RBG-13-54-9	g__norank_f__norank_o__RBG-13-54-9	s__unclassified_g__norank_f__norank_o__RBG-13-54-9	OTU2283	0	0	0	0	0	1	0	0	0	0	0	0	0	0	0	0	0	0	0	0	1
d__Bacteria	k__norank_d__Bacteria	p__Bdellovibrionota	c__Bdellovibrionia	o__Bdellovibrionales	f__Bdellovibrionaceae	g__Bdellovibrio	s__unclassified_g__Bdellovibrio	OTU7226	0	0	0	0	0	0	0	0	0	0	0	0	1	3	0	0	0	0	0	0	4
d__Bacteria	k__norank_d__Bacteria	p__Chloroflexi	c__Chloroflexia	o__Thermomicrobiales	f__JG30-KF-CM45	g__norank_f__JG30-KF-CM45	s__uncultured_bacterium_g__norank_f__JG30-KF-CM45	OTU7087	1	1	0	0	0	0	0	0	0	0	0	0	1	0	0	0	0	1	0	0	4
d__Bacteria	k__norank_d__Bacteria	p__Chloroflexi	c__Anaerolineae	o__SBR1031	f__A4b	g__norank_f__A4b	s__unclassified_g__norank_f__A4b	OTU3906	1	1	0	0	0	1	3	0	0	1	0	0	0	0	0	0	0	0	0	0	7
d__Bacteria	k__norank_d__Bacteria	p__Chloroflexi	c__Anaerolineae	o__SBR1031	f__A4b	g__norank_f__A4b	s__wastewater_metagenome_g__norank_f__A4b	OTU1193	5	5	14	1	5	0	11	6	0	1	0	0	0	1	0	1	0	0	0	0	50
d__Bacteria	k__norank_d__Bacteria	p__Cyanobacteria	c__Cyanobacteriia	o__Chloroplast	f__norank_o__Chloroplast	g__norank_f__norank_o__Chloroplast	s__unclassified_g__norank_f__norank_o__Chloroplast	OTU7150	0	0	1	0	0	0	0	0	0	0	12	6	8	6	5	0	0	0	0	0	38
d__Bacteria	k__norank_d__Bacteria	p__Proteobacteria	c__Gammaproteobacteria	o__Cellvibrionales	f__Spongiibacteraceae	g__BD1-7_clade	s__uncultured_bacterium_g__BD1-7_clade	OTU6314	6	15	2	13	3	6	13	9	9	38	2	2	2	0	0	3	6	5	10	2	146
d__Bacteria	k__norank_d__Bacteria	p__Proteobacteria	c__Gammaproteobacteria	o__Burkholderiales	f__Rhodocyclaceae	g__Propionivibrio	s__uncultured_bacterium_g__Propionivibrio	OTU6925	0	1	3	3	0	0	0	1	0	1	6	4	9	11	13	7	2	19	14	25	119
d__Bacteria	k__norank_d__Bacteria	p__Firmicutes	c__Bacilli	o__Bacillales	f__Planococcaceae	g__Rummeliibacillus	s__unclassified_g__Rummeliibacillus	OTU5666	1	0	0	1	0	0	1	0	1	0	0	0	0	1	0	0	2	1	1	3	12
d__Bacteria	k__norank_d__Bacteria	p__Patescibacteria	c__Saccharimonadia	o__Saccharimonadales	f__unclassified_o__Saccharimonadales	g__unclassified_o__Saccharimonadales	s__unclassified_o__Saccharimonadales	OTU7318	3	10	3	2	1	0	0	0	0	0	1	2	2	2	2	1	0	0	1	0	30
d__Bacteria	k__norank_d__Bacteria	p__Bdellovibrionota	c__Oligoflexia	o__0319-6G20	f__norank_o__0319-6G20	g__norank_f__norank_o__0319-6G20	s__bacterium_enrichment_culture_clone_B1262011	OTU1978	0	1	0	0	1	1	0	0	0	0	0	0	0	0	0	0	0	0	0	0	3
d__Bacteria	k__norank_d__Bacteria	p__Acidobacteriota	c__Vicinamibacteria	o__Vicinamibacterales	f__Vicinamibacteraceae	g__norank_f__Vicinamibacteraceae	s__uncultured_Acidobacteria_bacterium_g__norank_f__Vicinamibacteraceae	OTU4340	71	38	16	11	72	53	41	66	19	73	1	2	0	1	2	1	0	0	0	1	468
d__Bacteria	k__norank_d__Bacteria	p__Sumerlaeota	c__Sumerlaeia	o__Sumerlaeales	f__Sumerlaeaceae	g__Sumerlaea	s__unclassified_g__Sumerlaea	OTU2794	1	1	0	0	1	0	0	0	0	0	0	0	0	0	0	1	0	0	0	0	4
d__Bacteria	k__norank_d__Bacteria	p__MBNT15	c__norank_p__MBNT15	o__norank_c__norank_p__MBNT15	f__norank_o__norank_c__norank_p__MBNT15	g__norank_f__norank_o__norank_c__norank_p__MBNT15	s__unclassified_g__norank_f__norank_o__norank_c__norank_p__MBNT15	OTU3122	7	1	3	3	2	33	12	1	5	0	0	0	0	0	0	2	0	0	1	1	71
d__Bacteria	k__norank_d__Bacteria	p__Chloroflexi	c__unclassified_p__Chloroflexi	o__unclassified_p__Chloroflexi	f__unclassified_p__Chloroflexi	g__unclassified_p__Chloroflexi	s__unclassified_p__Chloroflexi	OTU2999	0	0	0	0	1	4	1	3	0	0	0	0	0	0	0	0	0	0	0	0	9
d__Bacteria	k__norank_d__Bacteria	p__Chloroflexi	c__Anaerolineae	o__Anaerolineales	f__Anaerolineaceae	g__Anaerolinea	s__uncultured_bacterium_g__Anaerolinea	OTU3311	3	2	1	3	1	1	2	0	4	1	0	0	1	0	0	0	0	0	0	0	19
d__Bacteria	k__norank_d__Bacteria	p__Spirochaetota	c__Leptospirae	o__Leptospirales	f__Leptospiraceae	g__RBG-16-49-21	s__unclassified_g__RBG-16-49-21	OTU4601	0	0	0	0	0	0	0	2	1	0	0	0	0	0	0	0	0	0	0	0	3
d__Bacteria	k__norank_d__Bacteria	p__Proteobacteria	c__Alphaproteobacteria	o__Micavibrionales	f__norank_o__Micavibrionales	g__norank_f__norank_o__Micavibrionales	s__unclassified_g__norank_f__norank_o__Micavibrionales	OTU8202	0	0	0	0	0	0	0	1	0	0	0	0	0	0	0	0	0	1	0	0	2
d__Bacteria	k__norank_d__Bacteria	p__Proteobacteria	c__Alphaproteobacteria	o__Caulobacterales	f__Hyphomonadaceae	g__SWB02	s__uncultured_bacterium_g__SWB02	OTU1109	22	11	16	13	12	1	6	13	3	8	0	1	1	1	1	1	0	0	4	1	115
d__Bacteria	k__norank_d__Bacteria	p__Bdellovibrionota	c__Bdellovibrionia	o__Bdellovibrionales	f__Bdellovibrionaceae	g__OM27_clade	s__unclassified_g__OM27_clade	OTU2054	1	1	3	0	4	0	0	1	0	0	0	0	0	0	0	0	0	0	0	0	10
d__Bacteria	k__norank_d__Bacteria	p__Patescibacteria	c__Saccharimonadia	o__Saccharimonadales	f__norank_o__Saccharimonadales	g__norank_f__norank_o__Saccharimonadales	s__uncultured_bacterium_g__norank_f__norank_o__Saccharimonadales	OTU7829	0	0	0	0	0	0	0	0	0	0	0	0	0	0	0	1	2	0	0	0	3
d__Bacteria	k__norank_d__Bacteria	p__Bacteroidota	c__Kapabacteria	o__Kapabacteriales	f__norank_o__Kapabacteriales	g__norank_f__norank_o__Kapabacteriales	s__uncultured_Chlorobiales_bacterium_g__norank	OTU934	0	0	2	1	0	0	0	0	0	0	0	0	0	0	0	0	0	0	0	0	3
d__Bacteria	k__norank_d__Bacteria	p__Patescibacteria	c__Gracilibacteria	o__norank_c__Gracilibacteria	f__norank_o__norank_c__Gracilibacteria	g__norank_f__norank_o__norank_c__Gracilibacteria	s__uncultured_bacterium_g__norank_f__norank_o__norank_c__Gracilibacteria	OTU3693	0	2	0	0	0	0	3	0	0	0	0	0	0	0	0	0	0	0	0	0	5
d__Bacteria	k__norank_d__Bacteria	p__Actinobacteriota	c__Actinobacteria	o__Frankiales	f__Sporichthyaceae	g__hgcI_clade	s__uncultured_bacterium_g__hgcI_clade	OTU7338	0	0	1	0	0	0	3	0	0	1	226	155	142	612	199	71	158	59	62	74	1763
d__Bacteria	k__norank_d__Bacteria	p__Bacteroidota	c__Bacteroidia	o__Sphingobacteriales	f__S15A-MN91	g__norank_f__S15A-MN91	s__uncultured_bacterium_g__norank_f__S15A-MN91	OTU1417	1	3	2	1	1	0	3	0	0	2	3	3	2	0	4	0	0	0	0	1	26
d__Bacteria	k__norank_d__Bacteria	p__Firmicutes	c__Bacilli	o__Lactobacillales	f__Lactobacillaceae	g__Pediococcus	s__Pediococcus_pentosaceus_g__Pediococcus	OTU1523	0	0	0	2	0	0	0	0	0	0	0	0	0	0	0	0	0	0	1	0	3
d__Bacteria	k__norank_d__Bacteria	p__Patescibacteria	c__WWE3	o__norank_c__WWE3	f__norank_o__norank_c__WWE3	g__norank_f__norank_o__norank_c__WWE3	s__unclassified_g__norank_f__norank_o__norank_c__WWE3	OTU5151	0	0	0	0	0	0	0	0	1	0	0	0	0	0	0	0	0	0	0	0	1
d__Bacteria	k__norank_d__Bacteria	p__Bacteroidota	c__Bacteroidia	o__Flavobacteriales	f__Flavobacteriaceae	g__Flavobacterium	s__Flavobacterium_sp._WG2	OTU7588	0	0	0	0	0	0	0	0	0	0	1	3	2	5	7	13	12	4	7	10	64
d__Bacteria	k__norank_d__Bacteria	p__Bacteroidota	c__Bacteroidia	o__Cytophagales	f__Microscillaceae	g__norank_f__Microscillaceae	s__unclassified_g__norank_f__Microscillaceae	OTU1988	15	5	4	1	5	2	4	0	0	6	0	0	0	1	0	0	0	0	0	0	43
d__Bacteria	k__norank_d__Bacteria	p__Myxococcota	c__Polyangia	o__Polyangiales	f__BIrii41	g__norank_f__BIrii41	s__uncultured_bacterium_g__norank_f__BIrii41	OTU3726	0	0	0	1	0	0	1	0	0	0	0	0	0	0	0	0	0	0	0	0	2
d__Bacteria	k__norank_d__Bacteria	p__Bacteroidota	c__Bacteroidia	o__Bacteroidales	f__Prolixibacteraceae	g__Roseimarinus	s__metagenome_g__Roseimarinus	OTU7103	0	0	0	0	0	0	0	0	0	0	0	1	1	0	1	0	0	0	0	0	3
d__Bacteria	k__norank_d__Bacteria	p__Acidobacteriota	c__Vicinamibacteria	o__Subgroup_9	f__norank_o__Subgroup_9	g__norank_f__norank_o__Subgroup_9	s__unclassified_g__norank_f__norank_o__Subgroup_9	OTU67	1	0	0	0	0	2	0	0	0	0	0	0	0	0	0	0	0	0	0	0	3
d__Bacteria	k__norank_d__Bacteria	p__Bacteroidota	c__Bacteroidia	o__Cytophagales	f__Hymenobacteraceae	g__Nibribacter	s__Rufibacter_sp._DG15C	OTU1085	0	0	3	0	0	0	0	0	0	0	0	0	0	0	0	0	0	1	0	0	4
d__Bacteria	k__norank_d__Bacteria	p__Chloroflexi	c__Anaerolineae	o__Anaerolineales	f__Anaerolineaceae	g__norank_f__Anaerolineaceae	s__unclassified_g__norank_f__Anaerolineaceae	OTU3425	4	4	5	3	7	0	6	2	16	5	0	0	0	0	0	0	0	0	0	0	52
d__Bacteria	k__norank_d__Bacteria	p__Planctomycetota	c__Planctomycetes	o__Gemmatales	f__Gemmataceae	g__norank_f__Gemmataceae	s__unclassified_g__norank_f__Gemmataceae	OTU6408	0	1	0	0	0	0	1	0	1	0	0	0	0	0	0	0	0	0	0	0	3
d__Bacteria	k__norank_d__Bacteria	p__Chloroflexi	c__Anaerolineae	o__RBG-13-54-9	f__norank_o__RBG-13-54-9	g__norank_f__norank_o__RBG-13-54-9	s__unclassified_g__norank_f__norank_o__RBG-13-54-9	OTU5340	0	1	2	0	1	5	9	1	8	1	0	0	0	0	0	0	0	0	0	0	28
d__Bacteria	k__norank_d__Bacteria	p__Firmicutes	c__Bacilli	o__Lactobacillales	f__Aerococcaceae	g__Dolosicoccus	s__uncultured_bacterium_g__Dolosicoccus	OTU4634	0	0	0	0	0	0	0	1	0	0	0	0	1	0	0	0	0	0	0	0	2
d__Bacteria	k__norank_d__Bacteria	p__Proteobacteria	c__Gammaproteobacteria	o__Aeromonadales	f__Aeromonadaceae	g__Aeromonas	s__Pseudaeromonas_sharmana	OTU8455	0	0	0	1	0	0	0	1	0	0	0	0	3	1	0	0	1	7	6	8	28
d__Bacteria	k__norank_d__Bacteria	p__Acidobacteriota	c__Blastocatellia	o__11-24	f__norank_o__11-24	g__norank_f__norank_o__11-24	s__uncultured_bacterium_g__norank_f__norank_o__11-24	OTU2275	1	2	1	1	4	0	2	2	0	1	0	0	0	0	0	0	0	0	0	2	16
d__Bacteria	k__norank_d__Bacteria	p__Chloroflexi	c__Anaerolineae	o__RBG-13-54-9	f__norank_o__RBG-13-54-9	g__norank_f__norank_o__RBG-13-54-9	s__uncultured_planctomycete_g__norank_f__norank_o__RBG-13-54-9	OTU7044	0	0	0	0	0	0	0	0	0	0	2	1	2	2	0	0	0	0	0	0	7
d__Bacteria	k__norank_d__Bacteria	p__Chloroflexi	c__Ktedonobacteria	o__Ktedonobacterales	f__JG30-KF-AS9	g__norank_f__JG30-KF-AS9	s__uncultured_bacterium_g__norank_f__JG30-KF-AS9	OTU3787	0	0	0	0	0	0	4	1	0	0	0	0	0	0	0	0	0	0	0	0	5
d__Bacteria	k__norank_d__Bacteria	p__Proteobacteria	c__Gammaproteobacteria	o__Vibrionales	f__Vibrionaceae	g__Vibrio	s__unclassified_g__Vibrio	OTU6708	0	0	0	0	0	0	0	0	0	0	1	0	0	0	0	0	0	1	0	0	2
d__Bacteria	k__norank_d__Bacteria	p__Nitrospirota	c__4-29-1	o__norank_c__4-29-1	f__norank_o__norank_c__4-29-1	g__norank_f__norank_o__norank_c__4-29-1	s__uncultured_bacterium_g__norank_f__norank_o__norank_c__4-29-1	OTU2195	0	4	1	0	10	3	0	2	3	2	0	0	0	0	0	0	0	0	0	0	25
d__Bacteria	k__norank_d__Bacteria	p__Acidobacteriota	c__Acidobacteriae	o__Bryobacterales	f__Bryobacteraceae	g__Bryobacter	s__uncultured_Acidobacteriaceae_bacterium_g__Bryobacter	OTU4724	1	1	1	0	2	0	1	0	0	0	0	0	0	0	0	0	0	0	0	0	6
d__Bacteria	k__norank_d__Bacteria	p__Proteobacteria	c__Gammaproteobacteria	o__Burkholderiales	f__Oxalobacteraceae	g__Noviherbaspirillum	s__Noviherbaspirillum_malthae	OTU8322	0	0	0	0	0	0	0	0	0	1	0	0	0	0	0	1	0	2	0	0	4
d__Bacteria	k__norank_d__Bacteria	p__Sva0485	c__norank_p__Sva0485	o__norank_c__norank_p__Sva0485	f__norank_o__norank_c__norank_p__Sva0485	g__norank_f__norank_o__norank_c__norank_p__Sva0485	s__uncultured_Desulfuromonadales_bacterium_g__norank_f__norank_o__norank_c__norank	OTU6064	1	12	3	4	1	1	3	2	13	24	0	0	0	1	0	0	0	0	0	1	66
d__Bacteria	k__norank_d__Bacteria	p__Bacteroidota	c__Bacteroidia	o__Bacteroidales	f__Dysgonomonadaceae	g__unclassified_f__Dysgonomonadaceae	s__unclassified_f__Dysgonomonadaceae	OTU1080	1	0	1	0	0	0	0	0	0	0	0	0	1	0	0	0	0	0	0	0	3
d__Bacteria	k__norank_d__Bacteria	p__Bacteroidota	c__Bacteroidia	o__Bacteroidales	f__unclassified_o__Bacteroidales	g__unclassified_o__Bacteroidales	s__unclassified_o__Bacteroidales	OTU6238	1	1	0	0	0	0	0	0	0	1	0	0	0	0	0	0	0	0	0	0	3
d__Bacteria	k__norank_d__Bacteria	p__Chloroflexi	c__Anaerolineae	o__SBR1031	f__norank_o__SBR1031	g__norank_f__norank_o__SBR1031	s__uncultured_Anaerolineaceae_bacterium_g__norank_f__norank_o__SBR1031	OTU5899	11	0	0	0	1	3	0	0	0	2	0	0	0	0	0	0	0	0	0	0	17
d__Bacteria	k__norank_d__Bacteria	p__WS4	c__norank_p__WS4	o__norank_c__norank_p__WS4	f__norank_o__norank_c__norank_p__WS4	g__norank_f__norank_o__norank_c__norank_p__WS4	s__uncultured_bacterium_g__norank_f__norank_o__norank_c__norank_p__WS4	OTU1369	0	0	2	0	2	1	3	0	0	1	0	0	0	0	0	0	0	0	0	0	9
d__Bacteria	k__norank_d__Bacteria	p__SAR324_cladeMarine_group_B	c__norank_p__SAR324_cladeMarine_group_B	o__norank_c__norank_p__SAR324_cladeMarine_group_B	f__norank_o__norank_c__norank_p__SAR324_cladeMarine_group_B	g__norank_f__norank_o__norank_c__norank_p__SAR324_cladeMarine_group_B	s__uncultured_bacterium_g__norank_f__norank_o__norank_c__norank_p__SAR324_cladeMarine_group_B	OTU6685	2	0	0	0	0	0	0	0	0	0	1	0	0	0	0	0	0	0	0	0	3
d__Bacteria	k__norank_d__Bacteria	p__Actinobacteriota	c__Actinobacteria	o__Micrococcales	f__Brevibacteriaceae	g__Brevibacterium	s__Brevibacterium_epidermidis	OTU8847	0	0	0	0	0	0	0	0	0	0	0	0	0	0	0	0	0	0	1	2	3
d__Bacteria	k__norank_d__Bacteria	p__Proteobacteria	c__Alphaproteobacteria	o__Rhizobiales	f__D05-2	g__norank_f__D05-2	s__alpha_proteobacterium_1153-i2a	OTU7953	1	0	1	0	0	0	0	0	0	0	0	0	0	0	0	0	0	0	0	0	2
d__Bacteria	k__norank_d__Bacteria	p__Bacteroidota	c__Bacteroidia	o__Chitinophagales	f__Saprospiraceae	g__norank_f__Saprospiraceae	s__unclassified_g__norank_f__Saprospiraceae	OTU7661	0	0	0	0	0	0	1	1	0	0	0	0	0	0	0	0	0	0	0	0	2
d__Bacteria	k__norank_d__Bacteria	p__DTB120	c__norank_p__DTB120	o__norank_c__norank_p__DTB120	f__norank_o__norank_c__norank_p__DTB120	g__norank_f__norank_o__norank_c__norank_p__DTB120	s__Deltaproteobacteria_bacterium_GWC2_55_46	OTU5872	1	6	1	0	7	0	0	1	1	3	0	0	0	0	0	0	0	0	0	0	20
d__Bacteria	k__norank_d__Bacteria	p__Actinobacteriota	c__Actinobacteria	o__PeM15	f__norank_o__PeM15	g__norank_f__norank_o__PeM15	s__metagenome_g__norank_f__norank_o__PeM15	OTU738	28	70	43	33	22	11	20	27	12	38	57	57	33	28	62	65	43	30	53	38	770
d__Bacteria	k__norank_d__Bacteria	p__Bdellovibrionota	c__Oligoflexia	o__0319-6G20	f__norank_o__0319-6G20	g__norank_f__norank_o__0319-6G20	s__unclassified_g__norank_f__norank_o__0319-6G20	OTU7631	0	0	0	0	0	0	0	0	0	0	0	0	0	0	0	1	0	0	2	0	3
d__Bacteria	k__norank_d__Bacteria	p__SAR324_cladeMarine_group_B	c__norank_p__SAR324_cladeMarine_group_B	o__norank_c__norank_p__SAR324_cladeMarine_group_B	f__norank_o__norank_c__norank_p__SAR324_cladeMarine_group_B	g__norank_f__norank_o__norank_c__norank_p__SAR324_cladeMarine_group_B	s__unclassified_g__norank_f__norank_o__norank_c__norank_p__SAR324_cladeMarine_group_B	OTU3239	0	0	0	3	0	0	1	0	1	1	0	0	0	0	0	0	0	0	0	0	6
d__Bacteria	k__norank_d__Bacteria	p__Deinococcota	c__Deinococci	o__Thermales	f__Thermaceae	g__norank_f__Thermaceae	s__uncultured_bacterium_g__norank_f__Thermaceae	OTU404	3	0	0	0	1	1	0	0	0	0	0	0	0	0	0	0	0	0	0	0	5
d__Bacteria	k__norank_d__Bacteria	p__Chloroflexi	c__Anaerolineae	o__SBR1031	f__norank_o__SBR1031	g__norank_f__norank_o__SBR1031	s__unclassified_g__norank_f__norank_o__SBR1031	OTU3357	0	2	3	1	1	3	4	4	9	4	0	0	0	0	0	0	0	0	0	0	31
d__Bacteria	k__norank_d__Bacteria	p__Elusimicrobiota	c__Lineage_IIa	o__norank_c__Lineage_IIa	f__norank_o__norank_c__Lineage_IIa	g__norank_f__norank_o__norank_c__Lineage_IIa	s__uncultured_soil_bacterium_g__norank_f__norank_o__norank_c__Lineage_IIa	OTU8372	0	1	0	0	0	0	0	0	0	0	0	0	0	0	1	1	0	0	0	0	3
d__Bacteria	k__norank_d__Bacteria	p__Proteobacteria	c__Alphaproteobacteria	o__Rhizobiales	f__Pleomorphomonadaceae	g__Pleomorphomonas	s__uncultured_bacterium_g__Pleomorphomonas	OTU1327	0	0	1	1	1	1	0	0	0	18	0	1	0	1	0	0	0	0	2	2	28
d__Bacteria	k__norank_d__Bacteria	p__Proteobacteria	c__Alphaproteobacteria	o__Puniceispirillales	f__EF100-94H03	g__norank_f__EF100-94H03	s__uncultured_bacterium_g__norank_f__EF100-94H03	OTU2803	1	0	0	0	1	2	0	0	0	0	0	0	0	0	0	0	0	0	0	0	4
d__Bacteria	k__norank_d__Bacteria	p__WS2	c__norank_p__WS2	o__norank_c__norank_p__WS2	f__norank_o__norank_c__norank_p__WS2	g__norank_f__norank_o__norank_c__norank_p__WS2	s__uncultured_bacterium_g__norank_f__norank_o__norank_c__norank_p__WS2	OTU3654	0	0	0	0	1	0	2	0	4	1	0	0	0	0	0	0	0	0	0	0	8
d__Bacteria	k__norank_d__Bacteria	p__Firmicutes	c__Clostridia	o__Lachnospirales	f__Lachnospiraceae	g__unclassified_f__Lachnospiraceae	s__unclassified_f__Lachnospiraceae	OTU1966	0	0	0	0	2	0	0	0	0	0	0	0	0	0	0	0	0	0	0	0	2
d__Bacteria	k__norank_d__Bacteria	p__Calditrichota	c__Calditrichia	o__Calditrichales	f__Calditrichaceae	g__norank_f__Calditrichaceae	s__uncultured_Sulfuricurvum_sp._g__norank	OTU1771	0	1	1	0	3	0	8	0	4	0	0	0	0	0	0	0	0	0	0	0	17
d__Bacteria	k__norank_d__Bacteria	p__RCP2-54	c__norank_p__RCP2-54	o__norank_c__norank_p__RCP2-54	f__norank_o__norank_c__norank_p__RCP2-54	g__norank_f__norank_o__norank_c__norank_p__RCP2-54	s__uncultured_delta_proteobacterium_g__norank_f__norank_o__norank_c__norank_p__RCP2-54	OTU3186	0	0	0	1	0	5	0	1	0	0	0	0	0	0	0	0	0	0	0	0	7
d__Bacteria	k__norank_d__Bacteria	p__Proteobacteria	c__Alphaproteobacteria	o__Rhizobiales	f__Beijerinckiaceae	g__Microvirga	s__Microvirga_ossetica	OTU2697	7	6	38	14	12	34	15	5	6	4	1	0	0	0	0	1	0	3	0	2	148
d__Bacteria	k__norank_d__Bacteria	p__Myxococcota	c__Polyangia	o__Haliangiales	f__Haliangiaceae	g__Haliangium	s__unclassified_g__Haliangium	OTU4230	1	0	0	0	0	0	0	1	0	0	0	0	0	0	0	0	0	0	0	0	2
d__Bacteria	k__norank_d__Bacteria	p__Proteobacteria	c__Gammaproteobacteria	o__Steroidobacterales	f__Steroidobacteraceae	g__norank_f__Steroidobacteraceae	s__uncultured_gamma_proteobacterium_g__norank_f__Steroidobacteraceae	OTU5896	476	805	510	1067	581	247	1039	938	1915	2029	83	67	44	81	32	45	39	30	99	58	10185
d__Bacteria	k__norank_d__Bacteria	p__Firmicutes	c__Clostridia	o__norank_c__Clostridia	f__Hungateiclostridiaceae	g__UCG-012	s__unclassified_g__UCG-012	OTU3341	0	0	0	0	0	0	0	0	2	0	0	0	0	0	0	0	0	0	0	0	2
d__Bacteria	k__norank_d__Bacteria	p__Chloroflexi	c__Anaerolineae	o__SBR1031	f__norank_o__SBR1031	g__norank_f__norank_o__SBR1031	s__uncultured_soil_bacterium_g__norank_f__norank_o__SBR1031	OTU2671	164	75	1	1	3	34	11	2	0	3	0	0	0	0	0	0	0	0	0	1	295
d__Bacteria	k__norank_d__Bacteria	p__Chloroflexi	c__Anaerolineae	o__SBR1031	f__norank_o__SBR1031	g__norank_f__norank_o__SBR1031	s__uncultured_bacterium_g__norank_f__norank_o__SBR1031	OTU2453	3	0	2	0	0	22	0	0	0	0	0	0	0	0	0	0	0	0	0	0	27
d__Bacteria	k__norank_d__Bacteria	p__Chloroflexi	c__Anaerolineae	o__SBR1031	f__A4b	g__norank_f__A4b	s__uncultured_Anaerolineae_bacterium_g__norank_f__A4b	OTU2090	0	0	0	0	2	0	0	0	0	1	0	0	0	0	0	0	0	0	0	0	3
d__Bacteria	k__norank_d__Bacteria	p__Cloacimonadota	c__Cloacimonadia	o__Cloacimonadales	f__PBS-18	g__norank_f__PBS-18	s__uncultured_bacterium_g__norank_f__PBS-18	OTU5684	0	2	0	0	1	0	2	0	2	1	0	0	0	0	0	0	0	0	0	0	8
d__Bacteria	k__norank_d__Bacteria	p__Proteobacteria	c__Alphaproteobacteria	o__Rhizobiales	f__Rhizobiaceae	g__Mesorhizobium	s__metagenome_g__Mesorhizobium	OTU1336	11	5	11	5	22	2	1	6	0	2	0	1	0	2	0	2	3	5	3	2	83
d__Bacteria	k__norank_d__Bacteria	p__Deinococcota	c__Deinococci	o__Deinococcales	f__Deinococcaceae	g__Deinococcus	s__Deinococcus_ficus	OTU6404	7	3	17	17	0	0	4	2	0	9	0	0	1	1	0	0	0	1	1	0	63
d__Bacteria	k__norank_d__Bacteria	p__Cyanobacteria	c__Cyanobacteriia	o__Chloroplast	f__norank_o__Chloroplast	g__norank_f__norank_o__Chloroplast	s__unclassified_g__norank_f__norank_o__Chloroplast	OTU5787	18	109	1	14	8	0	23	1	3	41	19	26	7	19	15	83	124	22	22	53	608
d__Bacteria	k__norank_d__Bacteria	p__Bacteroidota	c__Bacteroidia	o__Sphingobacteriales	f__AKYH767	g__norank_f__AKYH767	s__uncultured_bacterium_g__norank_f__AKYH767	OTU1270	0	0	3	1	0	0	0	0	0	0	0	0	0	0	0	0	0	0	0	0	4
d__Bacteria	k__norank_d__Bacteria	p__Myxococcota	c__Polyangia	o__Haliangiales	f__Haliangiaceae	g__Haliangium	s__unclassified_g__Haliangium	OTU3224	0	0	0	0	0	5	0	0	0	0	0	0	0	0	0	0	0	0	0	0	5
d__Bacteria	k__norank_d__Bacteria	p__Bacteroidota	c__Bacteroidia	o__Bacteroidales	f__Prolixibacteraceae	g__norank_f__Prolixibacteraceae	s__uncultured_bacterium_g__norank_f__Prolixibacteraceae	OTU3424	0	1	0	1	0	0	4	0	1	0	0	0	0	0	0	0	0	0	0	0	7
d__Bacteria	k__norank_d__Bacteria	p__Actinobacteriota	c__Actinobacteria	o__Frankiales	f__unclassified_o__Frankiales	g__unclassified_o__Frankiales	s__unclassified_o__Frankiales	OTU4067	1	0	0	1	1	2	1	1	0	1	0	0	0	0	0	0	0	0	0	0	8
d__Bacteria	k__norank_d__Bacteria	p__Myxococcota	c__Polyangia	o__Polyangiales	f__BIrii41	g__norank_f__BIrii41	s__unclassified_g__norank_f__BIrii41	OTU3024	0	0	0	0	3	3	0	0	0	2	0	0	0	0	0	0	0	0	1	0	9
d__Bacteria	k__norank_d__Bacteria	p__Latescibacterota	c__norank_p__Latescibacterota	o__norank_c__norank_p__Latescibacterota	f__norank_o__norank_c__norank_p__Latescibacterota	g__norank_f__norank_o__norank_c__norank_p__Latescibacterota	s__uncultured_Latescibacteria_bacterium_g__norank_f__norank	OTU4221	5	2	4	1	2	8	5	2	2	0	1	1	0	1	1	0	0	0	2	1	38
d__Bacteria	k__norank_d__Bacteria	p__Proteobacteria	c__Gammaproteobacteria	o__norank_c__Gammaproteobacteria	f__norank_o__norank_c__Gammaproteobacteria	g__norank_f__norank_o__norank_c__Gammaproteobacteria	s__uncultured_bacterium_g__norank_f__norank_o__norank_c__Gammaproteobacteria	OTU8723	0	0	0	0	0	0	0	0	0	0	0	1	0	0	0	2	2	0	2	1	8
d__Bacteria	k__norank_d__Bacteria	p__Proteobacteria	c__Alphaproteobacteria	o__Defluviicoccales	f__Defluviicoccaceae	g__Defluviicoccus	s__uncultured_bacterium_g__Defluviicoccus	OTU937	1	0	6	14	0	0	0	0	0	0	0	0	0	0	0	0	0	0	0	0	21
d__Bacteria	k__norank_d__Bacteria	p__Verrucomicrobiota	c__Kiritimatiellae	o__WCHB1-41	f__norank_o__WCHB1-41	g__norank_f__norank_o__WCHB1-41	s__uncultured_Verrucomicrobia_bacterium_g__norank_f__norank_o__WCHB1-41	OTU5879	1	1	0	0	0	0	0	0	0	2	0	0	0	0	0	0	0	0	0	0	4
d__Bacteria	k__norank_d__Bacteria	p__Spirochaetota	c__Spirochaetia	o__Spirochaetales	f__Spirochaetaceae	g__norank_f__Spirochaetaceae	s__uncultured_soil_bacterium_g__norank_f__Spirochaetaceae	OTU3315	0	0	0	0	0	0	1	0	0	1	0	0	0	0	0	0	0	0	0	0	2
d__Bacteria	k__norank_d__Bacteria	p__Acidobacteriota	c__Vicinamibacteria	o__Subgroup_17	f__norank_o__Subgroup_17	g__norank_f__norank_o__Subgroup_17	s__unclassified_g__norank_f__norank_o__Subgroup_17	OTU5949	6	1	2	0	5	3	0	4	0	5	0	0	0	0	0	0	0	0	0	0	26
d__Bacteria	k__norank_d__Bacteria	p__Bacteroidota	c__Bacteroidia	o__Bacteroidales	f__Williamwhitmaniaceae	g__Acetobacteroides	s__uncultured_bacterium_g__Acetobacteroides	OTU3705	0	8	5	7	4	1	6	0	1	0	1	0	0	0	0	0	1	1	3	0	38
d__Bacteria	k__norank_d__Bacteria	p__Acidobacteriota	c__Vicinamibacteria	o__Vicinamibacterales	f__norank_o__Vicinamibacterales	g__norank_f__norank_o__Vicinamibacterales	s__metagenome_g__norank_f__norank_o__Vicinamibacterales	OTU128	6	0	0	1	0	3	2	0	0	0	0	0	0	0	0	0	0	0	0	0	12
d__Bacteria	k__norank_d__Bacteria	p__Campilobacterota	c__Campylobacteria	o__Campylobacterales	f__Arcobacteraceae	g__norank_f__Arcobacteraceae	s__uncultured_Campylobacteraceae_bacterium_g__norank	OTU7172	0	0	0	0	0	0	0	0	0	0	0	16	34	17	52	0	1	7	6	1	134
d__Bacteria	k__norank_d__Bacteria	p__Myxococcota	c__Polyangia	o__Polyangiales	f__Phaselicystidaceae	g__Phaselicystis	s__unclassified_g__Phaselicystis	OTU6395	1	2	0	1	0	0	2	0	0	1	0	0	0	0	0	0	0	0	0	0	7
d__Bacteria	k__norank_d__Bacteria	p__Chloroflexi	c__JG30-KF-CM66	o__norank_c__JG30-KF-CM66	f__norank_o__norank_c__JG30-KF-CM66	g__norank_f__norank_o__norank_c__JG30-KF-CM66	s__unclassified_g__norank_f__norank_o__norank_c__JG30-KF-CM66	OTU3150	1	2	0	0	1	3	0	3	0	0	1	0	0	0	0	0	0	0	0	0	11
d__Bacteria	k__norank_d__Bacteria	p__Bacteroidota	c__Bacteroidia	o__Chitinophagales	f__Saprospiraceae	g__norank_f__Saprospiraceae	s__unclassified_g__norank_f__Saprospiraceae	OTU6759	0	0	0	0	0	0	0	0	0	0	4	8	7	3	5	2	3	0	0	0	32
d__Bacteria	k__norank_d__Bacteria	p__Desulfobacterota	c__Desulfobacteria	o__Desulfatiglandales	f__Desulfatiglandaceae	g__Desulfatiglans	s__uncultured_Desulfobacteraceae_bacterium_g__Desulfatiglans	OTU5813	0	0	0	1	2	1	0	1	0	0	0	0	0	0	0	0	0	0	0	0	5
d__Bacteria	k__norank_d__Bacteria	p__Verrucomicrobiota	c__Kiritimatiellae	o__WCHB1-41	f__norank_o__WCHB1-41	g__norank_f__norank_o__WCHB1-41	s__uncultured_Chlorobi_bacterium_g__norank	OTU4594	0	0	0	0	0	0	1	0	0	2	1	1	0	0	0	0	0	0	0	0	5
d__Bacteria	k__norank_d__Bacteria	p__Bacteroidota	c__Kryptonia	o__Kryptoniales	f__BSV26	g__norank_f__BSV26	s__unclassified_g__norank_f__BSV26	OTU5492	0	0	0	0	1	0	0	0	1	0	0	0	0	0	0	0	0	0	0	0	2
d__Bacteria	k__norank_d__Bacteria	p__Chloroflexi	c__JG30-KF-CM66	o__norank_c__JG30-KF-CM66	f__norank_o__norank_c__JG30-KF-CM66	g__norank_f__norank_o__norank_c__JG30-KF-CM66	s__uncultured_bacterium_g__norank_f__norank_o__norank_c__JG30-KF-CM66	OTU2479	0	0	0	0	0	3	0	0	0	0	0	0	0	0	0	0	0	0	0	0	3
d__Bacteria	k__norank_d__Bacteria	p__Chloroflexi	c__Anaerolineae	o__Caldilineales	f__Caldilineaceae	g__norank_f__Caldilineaceae	s__unclassified_g__norank_f__Caldilineaceae	OTU4988	0	0	1	1	0	0	0	1	0	2	0	0	0	0	0	0	0	0	0	0	5
d__Bacteria	k__norank_d__Bacteria	p__Proteobacteria	c__Gammaproteobacteria	o__norank_c__Gammaproteobacteria	f__norank_o__norank_c__Gammaproteobacteria	g__norank_f__norank_o__norank_c__Gammaproteobacteria	s__metagenome_g__norank_f__norank_o__norank_c__Gammaproteobacteria	OTU7665	0	1	0	0	0	0	0	0	0	0	0	0	0	0	0	1	0	0	0	1	3
d__Bacteria	k__norank_d__Bacteria	p__Proteobacteria	c__Alphaproteobacteria	o__Paracaedibacterales	f__Paracaedibacteraceae	g__unclassified_f__Paracaedibacteraceae	s__unclassified_f__Paracaedibacteraceae	OTU8523	0	0	0	0	0	0	0	0	0	0	0	0	0	0	0	0	1	0	2	0	3
d__Bacteria	k__norank_d__Bacteria	p__Myxococcota	c__Polyangia	o__UASB-TL25	f__norank_o__UASB-TL25	g__norank_f__norank_o__UASB-TL25	s__unclassified_g__norank_f__norank_o__UASB-TL25	OTU1845	0	0	1	0	1	0	0	0	0	0	0	0	0	0	0	0	0	0	0	0	2
d__Bacteria	k__norank_d__Bacteria	p__Proteobacteria	c__Gammaproteobacteria	o__PLTA13	f__norank_o__PLTA13	g__norank_f__norank_o__PLTA13	s__uncultured_bacterium_g__norank_f__norank_o__PLTA13	OTU5793	0	0	1	0	0	1	0	0	0	2	0	0	0	0	0	0	0	0	0	0	4
d__Bacteria	k__norank_d__Bacteria	p__Chloroflexi	c__SHA-26	o__norank_c__SHA-26	f__norank_o__norank_c__SHA-26	g__norank_f__norank_o__norank_c__SHA-26	s__uncultured_Dehalococcoides_sp._g__norank_f__norank_o__norank	OTU2724	0	0	0	0	0	4	0	0	0	0	0	0	0	0	0	0	0	0	0	0	4
d__Bacteria	k__norank_d__Bacteria	p__Elusimicrobiota	c__Endomicrobia	o__Endomicrobiales	f__Endomicrobiaceae	g__Endomicrobium	s__unclassified_g__Endomicrobium	OTU5237	0	0	0	0	0	0	0	0	2	0	0	0	0	0	0	0	0	0	0	0	2
d__Bacteria	k__norank_d__Bacteria	p__Planctomycetota	c__Phycisphaerae	o__Phycisphaerales	f__Phycisphaeraceae	g__SM1A02	s__uncultured_prokaryote_g__SM1A02	OTU7283	0	0	0	1	2	0	0	0	0	0	0	0	0	1	0	0	0	0	0	0	4
d__Bacteria	k__norank_d__Bacteria	p__LCP-89	c__norank_p__LCP-89	o__norank_c__norank_p__LCP-89	f__norank_o__norank_c__norank_p__LCP-89	g__norank_f__norank_o__norank_c__norank_p__LCP-89	s__uncultured_bacterium_g__norank_f__norank_o__norank_c__norank_p__LCP-89	OTU4101	0	2	1	1	0	0	0	1	10	2	0	0	0	0	0	0	0	0	0	0	17
d__Bacteria	k__norank_d__Bacteria	p__Myxococcota	c__Myxococcia	o__Myxococcales	f__Anaeromyxobacteraceae	g__Anaeromyxobacter	s__unclassified_g__Anaeromyxobacter	OTU1337	6	3	2	2	0	6	4	6	6	1	0	0	0	0	0	0	0	0	0	0	36
d__Bacteria	k__norank_d__Bacteria	p__Acidobacteriota	c__Vicinamibacteria	o__Vicinamibacterales	f__norank_o__Vicinamibacterales	g__norank_f__norank_o__Vicinamibacterales	s__uncultured_Acidobacteria_bacterium_g__norank_f__norank_o__Vicinamibacterales	OTU2450	3	0	0	0	0	3	0	0	0	1	0	0	0	0	0	0	0	0	0	0	7
d__Bacteria	k__norank_d__Bacteria	p__Firmicutes	c__Clostridia	o__Lachnospirales	f__norank_o__Lachnospirales	g__norank_f__norank_o__Lachnospirales	s__uncultured_bacterium_g__norank_f__norank_o__Lachnospirales	OTU798	0	5	0	1	0	2	0	1	1	0	0	0	0	0	0	0	1	0	1	1	13
d__Bacteria	k__norank_d__Bacteria	p__Proteobacteria	c__Gammaproteobacteria	o__Burkholderiales	f__Rhodocyclaceae	g__Sulfuritalea	s__unclassified_g__Sulfuritalea	OTU2006	0	0	1	1	1	0	0	0	0	0	1	1	1	3	3	0	1	1	0	1	15
d__Bacteria	k__norank_d__Bacteria	p__Chloroflexi	c__Anaerolineae	o__SBR1031	f__norank_o__SBR1031	g__norank_f__norank_o__SBR1031	s__unclassified_g__norank_f__norank_o__SBR1031	OTU300	4	0	1	0	0	0	0	0	0	0	0	0	0	0	0	0	0	0	0	0	5
d__Bacteria	k__norank_d__Bacteria	p__Chloroflexi	c__Anaerolineae	o__SBR1031	f__norank_o__SBR1031	g__norank_f__norank_o__SBR1031	s__unclassified_g__norank_f__norank_o__SBR1031	OTU303	1	0	0	0	1	0	1	0	0	1	0	0	0	0	0	0	0	0	0	0	4
d__Bacteria	k__norank_d__Bacteria	p__Bacteroidota	c__Bacteroidia	o__Sphingobacteriales	f__AKYH767	g__norank_f__AKYH767	s__unclassified_g__norank_f__AKYH767	OTU3760	2	2	1	1	2	0	1	0	0	0	0	0	0	0	0	0	0	0	0	0	9
d__Bacteria	k__norank_d__Bacteria	p__Firmicutes	c__Clostridia	o__norank_c__Clostridia	f__Hungateiclostridiaceae	g__unclassified_f__Hungateiclostridiaceae	s__unclassified_f__Hungateiclostridiaceae	OTU4669	1	1	13	0	1	0	1	0	0	0	0	0	0	0	0	0	0	0	0	0	17
d__Bacteria	k__norank_d__Bacteria	p__Patescibacteria	c__Gracilibacteria	o__JGI_0000069-P22	f__norank_o__JGI_0000069-P22	g__norank_f__norank_o__JGI_0000069-P22	s__uncultured_bacterium_g__norank_f__norank_o__JGI_0000069-P22	OTU7503	0	0	0	0	0	0	0	0	0	0	1	1	1	2	0	1	0	0	0	0	6
d__Bacteria	k__norank_d__Bacteria	p__Firmicutes	c__Negativicutes	o__Veillonellales-Selenomonadales	f__Selenomonadaceae	g__unclassified_f__Selenomonadaceae	s__unclassified_f__Selenomonadaceae	OTU7276	0	0	0	0	1	0	0	0	0	0	1	1	0	1	1	0	1	1	1	0	8
d__Bacteria	k__norank_d__Bacteria	p__Bacteroidota	c__Bacteroidia	o__Bacteroidales	f__Barnesiellaceae	g__Barnesiella	s__uncultured_organism_g__Barnesiella	OTU7287	0	0	0	0	0	0	0	0	0	0	1	0	3	2	2	0	1	1	1	1	12
d__Bacteria	k__norank_d__Bacteria	p__Firmicutes	c__Clostridia	o__norank_c__Clostridia	f__Hungateiclostridiaceae	g__unclassified_f__Hungateiclostridiaceae	s__unclassified_f__Hungateiclostridiaceae	OTU4665	0	0	0	0	0	0	1	1	0	0	0	0	0	0	0	0	0	0	0	0	2
d__Bacteria	k__norank_d__Bacteria	p__Proteobacteria	c__Gammaproteobacteria	o__unclassified_c__Gammaproteobacteria	f__unclassified_c__Gammaproteobacteria	g__unclassified_c__Gammaproteobacteria	s__unclassified_c__Gammaproteobacteria	OTU8027	0	0	0	0	0	0	0	0	0	0	0	0	0	0	0	1	5	1	0	0	7
d__Bacteria	k__norank_d__Bacteria	p__Firmicutes	c__Syntrophomonadia	o__Syntrophomonadales	f__Syntrophomonadaceae	g__Syntrophomonas	s__unclassified_g__Syntrophomonas	OTU1800	0	1	1	3	1	0	0	0	0	0	0	0	0	0	0	0	0	0	0	0	6
d__Bacteria	k__norank_d__Bacteria	p__Proteobacteria	c__Gammaproteobacteria	o__Xanthomonadales	f__Xanthomonadaceae	g__Arenimonas	s__unclassified_g__Arenimonas	OTU6287	10	9	25	17	3	16	9	10	1	6	0	0	1	1	1	1	3	3	2	5	123
d__Bacteria	k__norank_d__Bacteria	p__Acidobacteriota	c__Acidobacteriae	o__Bryobacterales	f__Bryobacteraceae	g__Bryobacter	s__uncultured_prokaryote_g__Bryobacter	OTU961	2	3	1	1	2	0	0	1	0	0	0	0	0	0	0	0	1	0	0	0	11
d__Bacteria	k__norank_d__Bacteria	p__Proteobacteria	c__Alphaproteobacteria	o__Rhodospirillales	f__norank_o__Rhodospirillales	g__norank_f__norank_o__Rhodospirillales	s__gut_metagenome_g__norank	OTU9059	0	0	0	0	0	0	0	0	0	0	0	0	0	0	0	0	0	1	0	0	1
d__Bacteria	k__norank_d__Bacteria	p__Proteobacteria	c__Gammaproteobacteria	o__Burkholderiales	f__Comamonadaceae	g__Rhizobacter	s__unclassified_g__Rhizobacter	OTU258	5	6	3	9	4	0	3	2	0	5	1	2	0	2	1	3	0	1	4	0	51
d__Bacteria	k__norank_d__Bacteria	p__Proteobacteria	c__Gammaproteobacteria	o__Acidithiobacillales	f__Acidithiobacillaceae	g__Acidithiobacillus	s__Acidithiobacillus_thiooxidans_g__Acidithiobacillus	OTU8018	1	0	0	0	0	0	0	0	0	0	0	0	0	0	1	0	0	0	1	0	3
d__Bacteria	k__norank_d__Bacteria	p__Deferribacterota	c__Deferribacteres	o__Deferribacterales	f__Deferribacteraceae	g__Seleniivibrio	s__unclassified_g__Seleniivibrio	OTU8209	0	0	0	0	0	0	0	0	0	0	0	0	0	0	2	0	0	2	0	1	5
d__Bacteria	k__norank_d__Bacteria	p__Acidobacteriota	c__Vicinamibacteria	o__Subgroup_17	f__norank_o__Subgroup_17	g__norank_f__norank_o__Subgroup_17	s__unclassified_g__norank_f__norank_o__Subgroup_17	OTU1325	0	1	2	1	0	1	0	0	2	2	0	0	0	0	0	0	0	0	0	0	9
d__Bacteria	k__norank_d__Bacteria	p__Proteobacteria	c__Gammaproteobacteria	o__CCM19a	f__norank_o__CCM19a	g__norank_f__norank_o__CCM19a	s__uncultured_bacterium_g__norank_f__norank_o__CCM19a	OTU5252	16	10	6	5	4	14	5	6	5	6	0	1	0	1	0	0	2	1	0	0	82
d__Bacteria	k__norank_d__Bacteria	p__Actinobacteriota	c__Thermoleophilia	o__Solirubrobacterales	f__67-14	g__norank_f__67-14	s__uncultured_bacterium_g__norank_f__67-14	OTU2719	2	3	2	0	1	4	2	5	1	3	1	0	0	0	0	0	0	0	1	0	25
d__Bacteria	k__norank_d__Bacteria	p__Caldisericota	c__Caldisericia	o__Caldisericales	f__LF045	g__norank_f__LF045	s__uncultured_bacterium_g__norank_f__LF045	OTU2577	0	0	0	0	0	1	0	0	0	0	0	0	0	0	0	0	0	0	0	0	1
d__Bacteria	k__norank_d__Bacteria	p__Bacteroidota	c__Bacteroidia	o__Cytophagales	f__Microscillaceae	g__OLB12	s__unclassified_g__OLB12	OTU28	5	0	0	0	0	0	0	0	0	0	0	0	0	0	0	0	0	0	0	0	5
d__Bacteria	k__norank_d__Bacteria	p__Proteobacteria	c__Gammaproteobacteria	o__Burkholderiales	f__Comamonadaceae	g__unclassified_f__Comamonadaceae	s__unclassified_f__Comamonadaceae	OTU6364	0	1	0	2	2	0	1	0	3	2	0	0	0	0	0	0	0	0	0	0	11
d__Bacteria	k__norank_d__Bacteria	p__Bacteroidota	c__Bacteroidia	o__Bacteroidales	f__Barnesiellaceae	g__norank_f__Barnesiellaceae	s__uncultured_bacterium_g__norank_f__Barnesiellaceae	OTU8693	0	0	0	0	0	0	0	0	0	0	0	0	0	0	0	0	0	2	2	0	4
d__Bacteria	k__norank_d__Bacteria	p__Actinobacteriota	c__Coriobacteriia	o__unclassified_c__Coriobacteriia	f__unclassified_c__Coriobacteriia	g__unclassified_c__Coriobacteriia	s__unclassified_c__Coriobacteriia	OTU2347	0	0	0	0	0	17	0	0	0	0	0	0	0	0	0	0	0	0	0	0	17
d__Bacteria	k__norank_d__Bacteria	p__Latescibacterota	c__norank_p__Latescibacterota	o__norank_c__norank_p__Latescibacterota	f__norank_o__norank_c__norank_p__Latescibacterota	g__norank_f__norank_o__norank_c__norank_p__Latescibacterota	s__uncultured_soil_bacterium_PBS-III-30	OTU3882	0	0	1	0	0	0	0	0	0	0	0	0	0	0	0	0	0	0	0	0	1
d__Bacteria	k__norank_d__Bacteria	p__Spirochaetota	c__Spirochaetia	o__Spirochaetales	f__Spirochaetaceae	g__GWE2-31-10	s__unclassified_g__GWE2-31-10	OTU2001	0	2	0	0	1	1	0	0	0	0	0	0	0	0	0	0	0	0	0	0	4
d__Bacteria	k__norank_d__Bacteria	p__Desulfobacterota	c__Desulfobacteria	o__Desulfatiglandales	f__Desulfatiglandaceae	g__Desulfatiglans	s__unclassified_g__Desulfatiglans	OTU5103	0	0	0	0	1	0	0	0	0	1	0	0	0	0	0	0	0	0	0	0	2
d__Bacteria	k__norank_d__Bacteria	p__Patescibacteria	c__ABY1	o__Candidatus_Falkowbacteria	f__norank_o__Candidatus_Falkowbacteria	g__norank_f__norank_o__Candidatus_Falkowbacteria	s__unclassified_g__norank_f__norank_o__Candidatus_Falkowbacteria	OTU1431	1	1	0	2	3	1	3	0	1	0	0	0	0	0	0	0	0	0	0	0	12
d__Bacteria	k__norank_d__Bacteria	p__Actinobacteriota	c__Acidimicrobiia	o__IMCC26256	f__norank_o__IMCC26256	g__norank_f__norank_o__IMCC26256	s__unclassified_g__norank_f__norank_o__IMCC26256	OTU3170	0	0	1	0	0	2	0	0	0	0	0	0	0	0	0	0	0	0	0	0	3
d__Bacteria	k__norank_d__Bacteria	p__Verrucomicrobiota	c__Verrucomicrobiae	o__norank_c__Verrucomicrobiae	f__norank_o__norank_c__Verrucomicrobiae	g__norank_f__norank_o__norank	s__uncultured_Opitutae_bacterium_g__norank	OTU7190	0	0	0	0	0	0	0	0	0	0	4	0	7	7	4	0	1	4	1	3	31
d__Bacteria	k__norank_d__Bacteria	p__Proteobacteria	c__Gammaproteobacteria	o__Burkholderiales	f__Nitrosomonadaceae	g__Nitrosomonas	s__metagenome_g__Nitrosomonas	OTU6419	6	40	5	11	30	1	7	2	0	2	0	1	2	1	2	0	0	0	0	1	111
d__Bacteria	k__norank_d__Bacteria	p__Bacteroidota	c__Kryptonia	o__Kryptoniales	f__MSB-3C8	g__norank_f__MSB-3C8	s__unclassified_g__norank_f__MSB-3C8	OTU1130	0	1	1	3	0	0	0	0	0	0	0	0	0	0	0	0	0	0	0	0	5
d__Bacteria	k__norank_d__Bacteria	p__Myxococcota	c__Polyangia	o__unclassified_c__Polyangia	f__unclassified_c__Polyangia	g__unclassified_c__Polyangia	s__unclassified_c__Polyangia	OTU4142	0	0	0	0	0	0	3	0	0	0	0	0	0	0	0	0	0	0	0	0	3
d__Bacteria	k__norank_d__Bacteria	p__Acidobacteriota	c__d142	o__norank_c__d142	f__norank_o__norank_c__d142	g__norank_f__norank_o__norank_c__d142	s__uncultured_Acidobacteria_bacterium_g__norank_f__norank_o__norank_c__d142	OTU1816	0	0	0	0	1	3	2	0	0	0	0	0	0	0	0	0	0	0	0	0	6
d__Bacteria	k__norank_d__Bacteria	p__Bacteroidota	c__Bacteroidia	o__Sphingobacteriales	f__AKYH767	g__norank_f__AKYH767	s__metagenome_g__norank_f__AKYH767	OTU608	0	1	1	0	0	0	0	1	0	0	0	0	0	0	0	0	0	0	0	0	3
d__Bacteria	k__norank_d__Bacteria	p__Myxococcota	c__Polyangia	o__unclassified_c__Polyangia	f__unclassified_c__Polyangia	g__unclassified_c__Polyangia	s__unclassified_c__Polyangia	OTU1425	0	0	0	2	0	0	2	0	0	0	0	0	0	0	0	0	0	0	0	0	4
d__Bacteria	k__norank_d__Bacteria	p__Desulfobacterota	c__norank_p__Desulfobacterota	o__norank_c__norank_p__Desulfobacterota	f__norank_o__norank_c__norank_p__Desulfobacterota	g__norank_f__norank_o__norank_c__norank_p__Desulfobacterota	s__unclassified_g__norank_f__norank_o__norank_c__norank_p__Desulfobacterota	OTU104	8	0	5	2	6	23	5	7	5	1	2	0	0	0	0	0	0	0	0	0	64
d__Bacteria	k__norank_d__Bacteria	p__Chloroflexi	c__Anaerolineae	o__Anaerolineales	f__Anaerolineaceae	g__norank_f__Anaerolineaceae	s__unclassified_g__norank_f__Anaerolineaceae	OTU3367	0	0	0	2	3	4	2	1	1	0	0	0	0	0	0	0	0	0	0	0	13
d__Bacteria	k__norank_d__Bacteria	p__Myxococcota	c__Polyangia	o__Polyangiales	f__Polyangiaceae	g__Pajaroellobacter	s__unclassified_g__Pajaroellobacter	OTU2519	0	0	0	0	0	2	0	0	0	0	0	0	0	0	0	0	0	0	0	0	2
d__Bacteria	k__norank_d__Bacteria	p__Latescibacterota	c__norank_p__Latescibacterota	o__norank_c__norank_p__Latescibacterota	f__norank_o__norank_c__norank_p__Latescibacterota	g__norank_f__norank_o__norank_c__norank_p__Latescibacterota	s__unclassified_g__norank_f__norank_o__norank_c__norank_p__Latescibacterota	OTU6403	0	0	0	0	0	1	0	1	0	1	0	0	0	0	0	0	0	0	0	0	3
d__Bacteria	k__norank_d__Bacteria	p__Firmicutes	c__Clostridia	o__norank_c__Clostridia	f__Hungateiclostridiaceae	g__unclassified_f__Hungateiclostridiaceae	s__unclassified_f__Hungateiclostridiaceae	OTU5183	0	0	1	5	2	0	0	1	1	1	0	0	0	0	0	0	0	0	0	0	11
d__Bacteria	k__norank_d__Bacteria	p__Patescibacteria	c__Dojkabacteria	o__norank_c__Dojkabacteria	f__norank_o__norank_c__Dojkabacteria	g__norank_f__norank_o__norank_c__Dojkabacteria	s__unclassified_g__norank_f__norank_o__norank_c__Dojkabacteria	OTU6897	1	1	0	1	0	0	0	0	1	0	1	1	0	0	0	0	0	0	0	0	6
d__Bacteria	k__norank_d__Bacteria	p__Chloroflexi	c__OLB14	o__norank_c__OLB14	f__norank_o__norank_c__OLB14	g__norank_f__norank_o__norank_c__OLB14	s__unclassified_g__norank_f__norank_o__norank_c__OLB14	OTU4215	1	1	1	1	2	4	4	7	2	3	0	0	0	0	0	0	0	0	0	0	26
d__Bacteria	k__norank_d__Bacteria	p__Proteobacteria	c__Gammaproteobacteria	o__Steroidobacterales	f__Steroidobacteraceae	g__norank_f__Steroidobacteraceae	s__Hypsibius_dujardini_g__norank	OTU5814	6	2	1	1	3	0	0	3	0	0	0	0	0	0	0	1	0	0	1	0	18
d__Bacteria	k__norank_d__Bacteria	p__Firmicutes	c__Bacilli	o__Paenibacillales	f__Paenibacillaceae	g__Cohnella	s__unclassified_g__Cohnella	OTU5700	0	0	0	1	0	3	1	0	3	1	0	0	0	1	0	0	0	0	1	2	13
d__Bacteria	k__norank_d__Bacteria	p__Bacteroidota	c__Bacteroidia	o__Bacteroidales	f__Marinilabiliaceae	g__Cytophaga_xylanolytica_group	s__uncultured_bacterium_g__Cytophaga_xylanolytica_group	OTU1299	3	6	14	13	2	0	4	0	0	0	0	0	0	0	0	0	0	0	0	0	42
d__Bacteria	k__norank_d__Bacteria	p__Acidobacteriota	c__Holophagae	o__Holophagales	f__Holophagaceae	g__Geothrix	s__uncultured_bacterium_g__Geothrix	OTU2936	0	0	2	1	0	2	1	0	0	1	0	1	1	1	0	0	0	1	0	0	11
d__Bacteria	k__norank_d__Bacteria	p__Chloroflexi	c__Anaerolineae	o__ADurb.Bin180	f__norank_o__ADurb.Bin180	g__norank_f__norank_o__ADurb.Bin180	s__uncultured_bacterium_SJA-68	OTU5444	1	5	4	10	18	13	33	16	100	10	0	2	0	0	0	0	1	0	0	0	213
d__Bacteria	k__norank_d__Bacteria	p__Bacteroidota	c__Bacteroidia	o__Bacteroidales	f__Marinilabiliaceae	g__Mangroviflexus	s__uncultured_bacterium_g__Mangroviflexus	OTU1517	0	0	0	25	0	0	0	0	0	0	0	0	0	0	0	0	0	0	0	0	25
d__Bacteria	k__norank_d__Bacteria	p__Myxococcota	c__Polyangia	o__Nannocystales	f__Nannocystaceae	g__Nannocystis	s__unclassified_g__Nannocystis	OTU223	1	0	1	0	0	1	0	1	0	0	0	0	0	0	0	0	0	0	0	0	4
d__Bacteria	k__norank_d__Bacteria	p__Margulisbacteria	c__norank_p__Margulisbacteria	o__norank_c__norank_p__Margulisbacteria	f__norank_o__norank_c__norank_p__Margulisbacteria	g__norank_f__norank_o__norank_c__norank_p__Margulisbacteria	s__uncultured_organism_g__norank_f__norank_o__norank_c__norank_p__Margulisbacteria	OTU8320	0	0	0	0	0	0	0	1	0	0	0	0	0	0	0	0	0	0	0	0	1
d__Bacteria	k__norank_d__Bacteria	p__Bacteroidota	c__Bacteroidia	o__Bacteroidetes_VC2.1_Bac22	f__norank_o__Bacteroidetes_VC2.1_Bac22	g__norank_f__norank_o__Bacteroidetes_VC2.1_Bac22	s__uncultured_soil_bacterium_g__norank_f__norank_o__Bacteroidetes_VC2.1_Bac22	OTU708	1	13	2	6	4	0	1	0	0	0	0	0	1	1	0	0	0	0	0	0	29
d__Bacteria	k__norank_d__Bacteria	p__Firmicutes	c__Clostridia	o__Peptostreptococcales-Tissierellales	f__Acidaminobacteraceae	g__Acidaminobacter	s__unclassified_g__Acidaminobacter	OTU4674	1	0	5	4	0	1	0	20	0	1	2	0	1	4	1	0	2	0	3	2	47
d__Bacteria	k__norank_d__Bacteria	p__Patescibacteria	c__Microgenomatia	o__Candidatus_Woykebacteria	f__norank_o__Candidatus_Woykebacteria	g__norank_f__norank_o__Candidatus_Woykebacteria	s__uncultured_bacterium_g__norank_f__norank_o__Candidatus_Woykebacteria	OTU8211	0	0	0	0	0	0	0	0	0	0	0	0	0	0	0	0	1	1	0	0	2
d__Bacteria	k__norank_d__Bacteria	p__Bacteroidota	c__Bacteroidia	o__Sphingobacteriales	f__Sphingobacteriaceae	g__Pedobacter	s__unclassified_g__Pedobacter	OTU8150	0	0	0	0	0	0	0	0	0	0	0	0	0	0	0	0	0	1	0	0	1
d__Bacteria	k__norank_d__Bacteria	p__Latescibacterota	c__Latescibacteria	o__Latescibacterales	f__Latescibacteraceae	g__norank_f__Latescibacteraceae	s__uncultured_bacterium_g__norank_f__Latescibacteraceae	OTU3708	0	0	0	0	0	1	0	0	0	0	0	0	0	0	0	0	0	0	0	0	1
d__Bacteria	k__norank_d__Bacteria	p__Patescibacteria	c__Gracilibacteria	o__norank_c__Gracilibacteria	f__norank_o__norank_c__Gracilibacteria	g__norank_f__norank_o__norank_c__Gracilibacteria	s__uncultured_bacterium_g__norank_f__norank_o__norank_c__Gracilibacteria	OTU435	0	1	0	0	0	0	0	0	0	0	0	0	0	0	0	0	0	0	0	1	2
d__Bacteria	k__norank_d__Bacteria	p__Chloroflexi	c__Ktedonobacteria	o__Ktedonobacterales	f__JG30-KF-AS9	g__norank_f__JG30-KF-AS9	s__uncultured_bacterium_g__norank_f__JG30-KF-AS9	OTU5324	0	0	0	0	0	0	0	0	1	0	0	0	0	0	0	0	0	0	0	0	1
d__Bacteria	k__norank_d__Bacteria	p__Patescibacteria	c__ABY1	o__Candidatus_Falkowbacteria	f__norank_o__Candidatus_Falkowbacteria	g__norank_f__norank_o__Candidatus_Falkowbacteria	s__uncultured_bacterium_g__norank_f__norank_o__Candidatus_Falkowbacteria	OTU838	0	2	0	0	0	0	0	0	0	0	0	0	0	0	0	0	0	0	0	0	2
d__Bacteria	k__norank_d__Bacteria	p__Cyanobacteria	c__Cyanobacteriia	o__Chloroplast	f__norank_o__Chloroplast	g__norank_f__norank_o__Chloroplast	s__unclassified_g__norank_f__norank_o__Chloroplast	OTU7971	0	0	0	0	0	0	0	0	0	0	4	2	3	1	2	15	28	1	1	3	60
d__Bacteria	k__norank_d__Bacteria	p__Proteobacteria	c__Alphaproteobacteria	o__Rhodospirillales	f__norank_o__Rhodospirillales	g__norank_f__norank_o__Rhodospirillales	s__uncultured_Rhodospirillales_bacterium_g__norank_f__norank_o__Rhodospirillales	OTU387	2	0	0	0	0	0	0	0	0	0	0	0	0	0	0	0	0	0	0	0	2
d__Bacteria	k__norank_d__Bacteria	p__Firmicutes	c__Bacilli	o__Erysipelotrichales	f__Erysipelatoclostridiaceae	g__UCG-004	s__unclassified_g__UCG-004	OTU8780	0	1	1	1	0	1	0	0	0	0	0	0	0	0	0	0	0	0	1	1	6
d__Bacteria	k__norank_d__Bacteria	p__Actinobacteriota	c__Actinobacteria	o__Micromonosporales	f__Micromonosporaceae	g__Micromonospora	s__Micromonospora_coxensis	OTU8962	51	22	31	17	50	66	45	21	56	16	5	2	0	11	2	2	4	1	3	4	409
d__Bacteria	k__norank_d__Bacteria	p__Proteobacteria	c__Gammaproteobacteria	o__Burkholderiales	f__Nitrosomonadaceae	g__MND1	s__uncultured_beta_proteobacterium_g__MND1	OTU6187	4	0	1	3	4	5	0	4	0	1	0	0	0	1	1	0	0	0	0	0	24
d__Bacteria	k__norank_d__Bacteria	p__Acidobacteriota	c__Subgroup_18	o__norank_c__Subgroup_18	f__norank_o__norank_c__Subgroup_18	g__norank_f__norank_o__norank_c__Subgroup_18	s__uncultured_prokaryote_g__norank_f__norank_o__norank_c__Subgroup_18	OTU1880	0	0	0	1	3	2	4	4	4	7	0	0	0	0	0	0	0	0	0	0	25
d__Bacteria	k__norank_d__Bacteria	p__Patescibacteria	c__WWE3	o__norank_c__WWE3	f__norank_o__norank_c__WWE3	g__norank_f__norank_o__norank_c__WWE3	s__uncultured_anaerobic_bacterium_g__norank_f__norank_o__norank_c__WWE3	OTU4437	0	0	4	0	0	0	0	1	0	0	0	0	0	0	0	0	0	0	0	0	5
d__Bacteria	k__norank_d__Bacteria	p__Bacteroidota	c__Bacteroidia	o__Bacteroidales	f__Bacteroidetes_BD2-2	g__norank_f__Bacteroidetes_BD2-2	s__uncultured_Bacteroidetes_bacterium_g__norank_f__Bacteroidetes_BD2-2	OTU5620	0	0	0	0	0	0	0	0	4	0	0	0	0	0	0	0	0	0	0	0	4
d__Bacteria	k__norank_d__Bacteria	p__Proteobacteria	c__Gammaproteobacteria	o__Burkholderiales	f__Nitrosomonadaceae	g__mle1-7	s__unclassified_g__mle1-7	OTU5905	0	0	0	0	0	0	1	0	0	0	0	0	0	0	0	0	0	0	0	0	1
d__Bacteria	k__norank_d__Bacteria	p__Gemmatimonadota	c__Gemmatimonadetes	o__Gemmatimonadales	f__Gemmatimonadaceae	g__norank_f__Gemmatimonadaceae	s__denitrifying_bacterium_enrichment_culture_clone_NOB_2_F8	OTU8626	1	1	0	0	0	0	3	0	0	3	0	0	0	0	0	1	0	3	10	1	23
d__Bacteria	k__norank_d__Bacteria	p__Proteobacteria	c__Alphaproteobacteria	o__Sphingomonadales	f__Sphingomonadaceae	g__Sandaracinobacter	s__uncultured_bacterium_g__Sandaracinobacter	OTU6503	0	2	0	1	1	1	1	1	0	8	0	0	1	0	1	1	0	0	0	3	21
d__Bacteria	k__norank_d__Bacteria	p__Proteobacteria	c__Gammaproteobacteria	o__Diplorickettsiales	f__Diplorickettsiaceae	g__Aquicella	s__uncultured_bacterium_g__Aquicella	OTU3225	0	1	0	0	0	1	0	0	0	0	0	0	0	0	0	0	0	0	0	0	2
d__Bacteria	k__norank_d__Bacteria	p__Gemmatimonadota	c__BD2-11_terrestrial_group	o__norank_c__BD2-11_terrestrial_group	f__norank_o__norank_c__BD2-11_terrestrial_group	g__norank_f__norank_o__norank_c__BD2-11_terrestrial_group	s__metagenome_g__norank_f__norank_o__norank_c__BD2-11_terrestrial_group	OTU234	6	0	0	0	0	0	0	0	0	1	0	0	0	0	0	0	0	0	0	0	7
d__Bacteria	k__norank_d__Bacteria	p__Spirochaetota	c__V2072-189E03	o__norank_c__V2072-189E03	f__norank_o__norank_c__V2072-189E03	g__norank_f__norank_o__norank_c__V2072-189E03	s__uncultured_Spirochaetales_bacterium_g__norank_f__norank	OTU4429	1	1	0	0	0	0	0	0	0	0	0	0	0	0	0	0	0	0	0	0	2
d__Bacteria	k__norank_d__Bacteria	p__Spirochaetota	c__Leptospirae	o__Leptospirales	f__Leptospiraceae	g__Leptospira	s__unclassified_g__Leptospira	OTU6830	0	0	0	0	0	0	0	0	0	0	1	2	0	0	0	0	0	0	0	0	3
d__Bacteria	k__norank_d__Bacteria	p__Acidobacteriota	c__norank_p__Acidobacteriota	o__norank_c__norank_p__Acidobacteriota	f__norank_o__norank_c__norank_p__Acidobacteriota	g__norank_f__norank_o__norank_c__norank_p__Acidobacteriota	s__uncultured_bacterium_g__norank_f__norank_o__norank_c__norank_p__Acidobacteriota	OTU1621	0	4	2	1	1	0	1	0	1	0	0	0	0	0	0	0	0	0	0	0	10
d__Bacteria	k__norank_d__Bacteria	p__Patescibacteria	c__Saccharimonadia	o__Saccharimonadales	f__norank_o__Saccharimonadales	g__norank_f__norank_o__Saccharimonadales	s__unclassified_g__norank_f__norank_o__Saccharimonadales	OTU7615	0	0	0	0	0	0	0	0	0	0	0	0	1	0	0	1	0	0	1	0	3
d__Bacteria	k__norank_d__Bacteria	p__Bacteroidota	c__Bacteroidia	o__Sphingobacteriales	f__Lentimicrobiaceae	g__Lentimicrobium	s__unclassified_g__Lentimicrobium	OTU3897	0	0	0	0	0	1	0	0	0	0	0	0	0	0	0	0	0	1	0	0	2
d__Bacteria	k__norank_d__Bacteria	p__Planctomycetota	c__Phycisphaerae	o__Phycisphaerales	f__Phycisphaeraceae	g__norank_f__Phycisphaeraceae	s__uncultured_bacterium_g__norank_f__Phycisphaeraceae	OTU3629	1	0	0	0	1	0	0	0	0	0	0	0	0	0	0	0	0	0	0	0	2
d__Bacteria	k__norank_d__Bacteria	p__Acidobacteriota	c__Vicinamibacteria	o__Vicinamibacterales	f__norank_o__Vicinamibacterales	g__norank_f__norank_o__Vicinamibacterales	s__unclassified_g__norank_f__norank_o__Vicinamibacterales	OTU3855	21	0	1	0	5	126	3	1	1	1	0	0	0	0	0	0	0	0	0	0	159
d__Bacteria	k__norank_d__Bacteria	p__Acidobacteriota	c__Vicinamibacteria	o__Vicinamibacterales	f__norank_o__Vicinamibacterales	g__norank_f__norank_o__Vicinamibacterales	s__unclassified_g__norank_f__norank_o__Vicinamibacterales	OTU3854	2	1	0	0	0	15	0	1	0	0	0	0	0	0	0	0	0	0	0	0	19
d__Bacteria	k__norank_d__Bacteria	p__Desulfobacterota	c__Desulfuromonadia	o__Geobacterales	f__Geobacteraceae	g__Citrifermentans	s__uncultured_delta_proteobacterium_g__Citrifermentans	OTU3829	3	3	0	3	8	2	2	3	1	1	0	1	0	0	0	0	0	0	0	1	28
d__Bacteria	k__norank_d__Bacteria	p__Bdellovibrionota	c__Oligoflexia	o__Silvanigrellales	f__Silvanigrellaceae	g__unclassified_f__Silvanigrellaceae	s__unclassified_f__Silvanigrellaceae	OTU4231	0	0	0	0	0	0	0	1	0	0	0	0	0	0	0	0	0	0	0	0	1
d__Bacteria	k__norank_d__Bacteria	p__Patescibacteria	c__ABY1	o__Candidatus_Magasanikbacteria	f__norank_o__Candidatus_Magasanikbacteria	g__norank_f__norank_o__Candidatus_Magasanikbacteria	s__unclassified_g__norank_f__norank_o__Candidatus_Magasanikbacteria	OTU7096	0	0	1	0	0	0	0	0	0	0	0	0	1	0	0	0	0	0	2	0	4
d__Bacteria	k__norank_d__Bacteria	p__Acidobacteriota	c__Thermoanaerobaculia	o__Thermoanaerobaculales	f__Thermoanaerobaculaceae	g__TPD-58	s__uncultured_bacterium_g__TPD-58	OTU3806	0	0	0	0	0	0	1	0	0	1	0	0	0	0	0	0	0	0	0	0	2
d__Bacteria	k__norank_d__Bacteria	p__Firmicutes	c__Clostridia	o__Clostridiales	f__Clostridiaceae	g__Clostridium_sensu_stricto_6	s__Clostridium_bornimense	OTU8552	0	0	2	0	1	1	1	1	1	0	0	0	0	0	0	0	0	0	1	0	8
d__Bacteria	k__norank_d__Bacteria	p__Myxococcota	c__Myxococcia	o__Myxococcales	f__Myxococcaceae	g__P3OB-42	s__uncultured_bacterium_g__P3OB-42	OTU3754	2	0	0	0	1	0	0	0	0	0	0	0	0	0	0	0	0	0	0	0	3
d__Bacteria	k__norank_d__Bacteria	p__Bacteroidota	c__Bacteroidia	o__Chitinophagales	f__Chitinophagaceae	g__Flaviaesturariibacter	s__uncultured_bacterium_g__Flaviaesturariibacter	OTU1877	0	1	4	3	3	0	0	0	0	1	0	0	0	0	0	0	0	0	0	0	12
d__Bacteria	k__norank_d__Bacteria	p__Proteobacteria	c__Alphaproteobacteria	o__Azospirillales	f__Azospirillaceae	g__Niveispirillum	s__unclassified_g__Niveispirillum	OTU8512	0	0	0	0	0	0	0	0	0	0	0	0	2	0	0	0	3	12	8	11	36
d__Bacteria	k__norank_d__Bacteria	p__Chloroflexi	c__JG30-KF-CM66	o__norank_c__JG30-KF-CM66	f__norank_o__norank_c__JG30-KF-CM66	g__norank_f__norank_o__norank_c__JG30-KF-CM66	s__uncultured_bacterium_g__norank_f__norank_o__norank_c__JG30-KF-CM66	OTU2564	0	0	0	0	0	5	0	0	0	0	0	0	0	0	0	0	0	0	0	0	5
d__Bacteria	k__norank_d__Bacteria	p__Chloroflexi	c__Anaerolineae	o__Anaerolineales	f__Anaerolineaceae	g__GWD2-49-16	s__uncultured_bacterium_g__GWD2-49-16	OTU8826	0	1	0	0	3	0	1	0	1	0	0	0	0	0	0	0	0	0	0	0	6
d__Bacteria	k__norank_d__Bacteria	p__Chloroflexi	c__Anaerolineae	o__Anaerolineales	f__Anaerolineaceae	g__Anaerolinea	s__unclassified_g__Anaerolinea	OTU3563	0	3	1	2	10	0	3	3	6	1	0	0	0	1	0	0	0	0	0	0	30
d__Bacteria	k__norank_d__Bacteria	p__Patescibacteria	c__Parcubacteria	o__Candidatus_Kaiserbacteria	f__norank_o__Candidatus_Kaiserbacteria	g__norank_f__norank_o__Candidatus_Kaiserbacteria	s__Parcubacteria_group_bacterium_GW2011_GWD2_42_14	OTU6996	0	1	0	0	0	0	0	0	0	0	0	0	0	0	0	0	0	0	0	0	1
d__Bacteria	k__norank_d__Bacteria	p__Verrucomicrobiota	c__Lentisphaeria	o__Victivallales	f__PRD18C08	g__norank_f__PRD18C08	s__unclassified_g__norank_f__PRD18C08	OTU8116	0	0	0	0	0	0	0	0	0	0	0	0	0	0	0	0	0	1	0	0	1
d__Bacteria	k__norank_d__Bacteria	p__Bdellovibrionota	c__Bdellovibrionia	o__Bdellovibrionales	f__Bdellovibrionaceae	g__OM27_clade	s__unclassified_g__OM27_clade	OTU207	1	0	0	0	1	3	0	0	0	0	0	0	0	0	0	0	0	0	0	1	6
d__Bacteria	k__norank_d__Bacteria	p__Chloroflexi	c__Anaerolineae	o__SBR1031	f__norank_o__SBR1031	g__norank_f__norank_o__SBR1031	s__unclassified_g__norank_f__norank_o__SBR1031	OTU1705	0	0	1	0	0	0	0	0	0	0	0	0	0	0	0	0	0	0	0	0	1
d__Bacteria	k__norank_d__Bacteria	p__Proteobacteria	c__Gammaproteobacteria	o__Burkholderiales	f__SC-I-84	g__norank_f__SC-I-84	s__uncultured_bacterium_g__norank_f__SC-I-84	OTU2091	31	27	65	66	33	11	17	48	34	42	1	1	3	5	3	0	1	2	4	1	395
d__Bacteria	k__norank_d__Bacteria	p__Patescibacteria	c__WWE3	o__norank_c__WWE3	f__norank_o__norank_c__WWE3	g__norank_f__norank_o__norank_c__WWE3	s__unclassified_g__norank_f__norank_o__norank_c__WWE3	OTU6212	3	0	1	0	1	0	0	0	0	2	2	0	0	0	1	0	2	0	1	0	13
d__Bacteria	k__norank_d__Bacteria	p__Patescibacteria	c__Dojkabacteria	o__norank_c__Dojkabacteria	f__norank_o__norank_c__Dojkabacteria	g__norank_f__norank_o__norank_c__Dojkabacteria	s__uncultured_anaerobic_bacterium_g__norank_f__norank_o__norank_c__Dojkabacteria	OTU1685	0	1	1	2	0	1	1	0	0	0	1	0	1	1	1	0	0	0	0	0	10
d__Bacteria	k__norank_d__Bacteria	p__Patescibacteria	c__Parcubacteria	o__norank_c__Parcubacteria	f__norank_o__norank_c__Parcubacteria	g__norank_f__norank_o__norank_c__Parcubacteria	s__uncultured_bacterium_g__norank_f__norank_o__norank_c__Parcubacteria	OTU2032	8	3	9	5	7	0	0	1	0	0	2	0	1	1	2	2	8	0	3	5	57
d__Bacteria	k__norank_d__Bacteria	p__Nitrospinota	c__P9X2b3D02	o__norank_c__P9X2b3D02	f__norank_o__norank_c__P9X2b3D02	g__norank_f__norank_o__norank_c__P9X2b3D02	s__uncultured_prokaryote_g__norank_f__norank_o__norank_c__P9X2b3D02	OTU2063	0	2	2	1	3	1	0	0	0	1	0	0	0	0	0	0	0	0	0	0	10
d__Bacteria	k__norank_d__Bacteria	p__Sumerlaeota	c__Sumerlaeia	o__Sumerlaeales	f__Sumerlaeaceae	g__Sumerlaea	s__uncultured_soil_bacterium_g__Sumerlaea	OTU3422	0	0	1	0	1	0	1	0	0	0	0	0	0	0	0	0	0	0	0	0	3
d__Bacteria	k__norank_d__Bacteria	p__Desulfobacterota	c__Desulfobulbia	o__Desulfobulbales	f__Desulfocapsaceae	g__norank_f__Desulfocapsaceae	s__unclassified_g__norank_f__Desulfocapsaceae	OTU18	3	3	0	0	0	0	0	0	0	0	1	0	0	0	1	0	0	0	0	0	8
d__Bacteria	k__norank_d__Bacteria	p__Firmicutes	c__Clostridia	o__Lachnospirales	f__unclassified_o__Lachnospirales	g__unclassified_o__Lachnospirales	s__unclassified_o__Lachnospirales	OTU5438	0	0	0	0	0	0	0	0	1	0	0	0	0	0	0	0	0	0	0	0	1
d__Bacteria	k__norank_d__Bacteria	p__Chloroflexi	c__Anaerolineae	o__SBR1031	f__norank_o__SBR1031	g__norank_f__norank_o__SBR1031	s__unclassified_g__norank_f__norank_o__SBR1031	OTU2298	0	0	0	0	0	4	1	0	0	0	0	0	0	0	0	0	0	0	0	0	5
d__Bacteria	k__norank_d__Bacteria	p__Methylomirabilota	c__Methylomirabilia	o__Rokubacteriales	f__WX65	g__norank_f__WX65	s__uncultured_bacterium_g__norank_f__WX65	OTU291	2	0	0	2	0	3	2	1	1	0	0	0	0	0	0	0	0	0	0	0	11
d__Bacteria	k__norank_d__Bacteria	p__SAR324_cladeMarine_group_B	c__norank_p__SAR324_cladeMarine_group_B	o__norank_c__norank_p__SAR324_cladeMarine_group_B	f__norank_o__norank_c__norank_p__SAR324_cladeMarine_group_B	g__norank_f__norank_o__norank_c__norank_p__SAR324_cladeMarine_group_B	s__metagenome_g__norank_f__norank_o__norank_c__norank_p__SAR324_cladeMarine_group_B	OTU1279	0	1	0	0	0	0	0	0	0	0	0	0	0	0	0	0	0	0	0	0	1
d__Bacteria	k__norank_d__Bacteria	p__Acidobacteriota	c__Subgroup_19	o__norank_c__Subgroup_19	f__norank_o__norank_c__Subgroup_19	g__norank_f__norank_o__norank_c__Subgroup_19	s__uncultured_bacterium_g__norank_f__norank_o__norank_c__Subgroup_19	OTU6110	0	1	0	0	2	0	0	0	0	2	0	0	0	0	0	0	0	0	0	0	5
d__Bacteria	k__norank_d__Bacteria	p__Chloroflexi	c__Anaerolineae	o__SBR1031	f__norank_o__SBR1031	g__norank_f__norank_o__SBR1031	s__unclassified_g__norank_f__norank_o__SBR1031	OTU2294	0	0	0	0	0	5	0	0	0	0	0	0	0	0	0	0	0	0	0	0	5
d__Bacteria	k__norank_d__Bacteria	p__Bdellovibrionota	c__Oligoflexia	o__0319-6G20	f__norank_o__0319-6G20	g__norank_f__norank_o__0319-6G20	s__unclassified_g__norank_f__norank_o__0319-6G20	OTU5714	0	0	1	0	1	0	0	0	0	1	0	0	0	0	0	0	0	0	0	0	3
d__Bacteria	k__norank_d__Bacteria	p__Patescibacteria	c__Saccharimonadia	o__Saccharimonadales	f__norank_o__Saccharimonadales	g__norank_f__norank_o__Saccharimonadales	s__uncultured_bacterium_g__norank_f__norank_o__Saccharimonadales	OTU842	4	2	2	0	1	0	0	0	0	0	1	0	0	0	0	0	0	1	1	0	12
d__Bacteria	k__norank_d__Bacteria	p__Acidobacteriota	c__Vicinamibacteria	o__Vicinamibacterales	f__norank_o__Vicinamibacterales	g__norank_f__norank_o__Vicinamibacterales	s__unclassified_g__norank_f__norank_o__Vicinamibacterales	OTU4670	1	0	1	0	0	9	0	0	0	0	0	0	0	0	0	0	0	0	0	0	11
d__Bacteria	k__norank_d__Bacteria	p__Acidobacteriota	c__Vicinamibacteria	o__Vicinamibacterales	f__norank_o__Vicinamibacterales	g__norank_f__norank_o__Vicinamibacterales	s__unclassified_g__norank_f__norank_o__Vicinamibacterales	OTU264	6	2	1	0	6	3	2	3	1	3	0	1	0	0	0	0	0	0	0	1	29
d__Bacteria	k__norank_d__Bacteria	p__Firmicutes	c__Negativicutes	o__Veillonellales-Selenomonadales	f__Selenomonadaceae	g__unclassified_f__Selenomonadaceae	s__unclassified_f__Selenomonadaceae	OTU6595	0	0	0	0	0	0	0	0	0	0	1	0	1	0	0	0	0	0	0	0	2
d__Bacteria	k__norank_d__Bacteria	p__Methylomirabilota	c__Methylomirabilia	o__Methylomirabilales	f__Methylomirabilaceae	g__Sh765B-TzT-35	s__uncultured_bacterium_g__Sh765B-TzT-35	OTU6487	0	1	1	1	0	12	5	1	15	5	0	1	0	0	0	0	0	0	0	1	43
d__Bacteria	k__norank_d__Bacteria	p__Verrucomicrobiota	c__Verrucomicrobiae	o__Verrucomicrobiales	f__Verrucomicrobiaceae	g__unclassified_f__Verrucomicrobiaceae	s__unclassified_f__Verrucomicrobiaceae	OTU7250	0	0	0	0	0	0	0	0	0	0	0	1	3	2	0	0	0	1	0	0	7
d__Bacteria	k__norank_d__Bacteria	p__Latescibacterota	c__norank_p__Latescibacterota	o__norank_c__norank_p__Latescibacterota	f__norank_o__norank_c__norank_p__Latescibacterota	g__norank_f__norank_o__norank_c__norank_p__Latescibacterota	s__metagenome_g__norank_f__norank_o__norank_c__norank_p__Latescibacterota	OTU6180	0	0	0	0	0	0	0	0	0	2	0	0	0	0	0	0	0	0	0	0	2
d__Bacteria	k__norank_d__Bacteria	p__Cyanobacteria	c__Cyanobacteriia	o__Chloroplast	f__norank_o__Chloroplast	g__norank_f__norank_o__Chloroplast	s__unclassified_g__norank_f__norank_o__Chloroplast	OTU6899	0	0	0	0	0	0	0	0	0	0	24	15	18	19	31	25	46	5	2	2	187
d__Bacteria	k__norank_d__Bacteria	p__Proteobacteria	c__Alphaproteobacteria	o__Defluviicoccales	f__Defluviicoccaceae	g__Defluviicoccus	s__unclassified_g__Defluviicoccus	OTU4337	3	2	6	9	1	0	1	4	1	0	0	0	1	1	1	0	0	0	0	0	30
d__Bacteria	k__norank_d__Bacteria	p__Chloroflexi	c__Anaerolineae	o__RBG-13-54-9	f__norank_o__RBG-13-54-9	g__norank_f__norank_o__RBG-13-54-9	s__uncultured_bacterium_g__norank_f__norank_o__RBG-13-54-9	OTU3562	2	3	1	2	0	0	3	1	13	1	0	1	0	0	0	0	0	0	0	0	27
d__Bacteria	k__norank_d__Bacteria	p__Proteobacteria	c__Gammaproteobacteria	o__Pseudomonadales	f__Moraxellaceae	g__unclassified_f__Moraxellaceae	s__unclassified_f__Moraxellaceae	OTU6914	0	0	0	0	3	0	0	0	0	0	0	7	0	1	2	0	0	0	0	0	13
d__Bacteria	k__norank_d__Bacteria	p__Bacteroidota	c__Bacteroidia	o__Bacteroidales	f__Prevotellaceae	g__Prevotella	s__uncultured_bacterium_g__Prevotella	OTU7390	0	0	0	0	0	0	0	0	0	0	0	0	2	0	1	1	0	0	0	0	4
d__Bacteria	k__norank_d__Bacteria	p__Patescibacteria	c__Parcubacteria	o__Candidatus_Adlerbacteria	f__norank_o__Candidatus_Adlerbacteria	g__norank_f__norank_o__Candidatus_Adlerbacteria	s__uncultured_bacterium_g__norank_f__norank_o__Candidatus_Adlerbacteria	OTU8045	0	0	0	0	0	0	0	0	0	0	0	0	0	0	0	1	0	2	0	1	4
d__Bacteria	k__norank_d__Bacteria	p__Bacteroidota	c__Bacteroidia	o__Bacteroidales	f__Prevotellaceae	g__Prevotella	s__uncultured_bacterium_g__Prevotella	OTU7468	0	0	0	0	0	0	0	0	0	0	0	0	0	1	0	0	0	0	0	0	1
d__Bacteria	k__norank_d__Bacteria	p__Firmicutes	c__Bacilli	o__Paenibacillales	f__Paenibacillaceae	g__Paenibacillus	s__unclassified_g__Paenibacillus	OTU4565	0	0	0	0	0	0	0	1	0	0	0	0	0	0	0	0	0	0	0	0	1
d__Bacteria	k__norank_d__Bacteria	p__Patescibacteria	c__Dojkabacteria	o__norank_c__Dojkabacteria	f__norank_o__norank_c__Dojkabacteria	g__norank_f__norank_o__norank_c__Dojkabacteria	s__unclassified_g__norank_f__norank_o__norank_c__Dojkabacteria	OTU6170	0	0	0	0	0	0	0	0	0	1	0	0	0	0	0	0	0	0	0	0	1
d__Bacteria	k__norank_d__Bacteria	p__Patescibacteria	c__Parcubacteria	o__Candidatus_Kaiserbacteria	f__norank_o__Candidatus_Kaiserbacteria	g__norank_f__norank_o__Candidatus_Kaiserbacteria	s__metagenome_g__norank_f__norank_o__Candidatus_Kaiserbacteria	OTU2058	0	0	0	0	1	0	0	0	0	0	1	0	0	0	0	1	0	2	0	0	5
d__Bacteria	k__norank_d__Bacteria	p__Cyanobacteria	c__Cyanobacteriia	o__Chloroplast	f__norank_o__Chloroplast	g__norank_f__norank_o__Chloroplast	s__unclassified_g__norank_f__norank_o__Chloroplast	OTU7360	0	2	4	1	2	0	3	2	1	0	18	9	6	3	4	3	5	0	1	0	64
d__Bacteria	k__norank_d__Bacteria	p__Myxococcota	c__Polyangia	o__Polyangiales	f__Sandaracinaceae	g__norank_f__Sandaracinaceae	s__unclassified_g__norank_f__Sandaracinaceae	OTU1379	19	5	13	11	1	0	6	0	0	0	0	0	0	2	0	0	0	0	0	0	57
d__Bacteria	k__norank_d__Bacteria	p__Bdellovibrionota	c__Oligoflexia	o__053A03-B-DI-P58	f__norank_o__053A03-B-DI-P58	g__norank_f__norank_o__053A03-B-DI-P58	s__unclassified_g__norank_f__norank_o__053A03-B-DI-P58	OTU867	0	1	0	0	0	0	0	0	0	0	0	0	0	0	0	0	0	0	0	0	1
d__Bacteria	k__norank_d__Bacteria	p__Proteobacteria	c__Gammaproteobacteria	o__Alteromonadales	f__Shewanellaceae	g__Shewanella	s__Shewanella_sp._FDAARGOS_354	OTU8468	0	0	0	0	0	0	0	0	0	0	1	0	0	1	0	3	0	14	12	17	48
d__Bacteria	k__norank_d__Bacteria	p__Myxococcota	c__Polyangia	o__UASB-TL25	f__norank_o__UASB-TL25	g__norank_f__norank_o__UASB-TL25	s__unclassified_g__norank_f__norank_o__UASB-TL25	OTU4774	0	0	0	0	0	0	0	1	0	0	0	0	0	0	0	0	0	0	0	0	1
d__Bacteria	k__norank_d__Bacteria	p__Patescibacteria	c__ABY1	o__Candidatus_Kerfeldbacteria	f__norank_o__Candidatus_Kerfeldbacteria	g__norank_f__norank_o__Candidatus_Kerfeldbacteria	s__uncultured_bacterium_g__norank_f__norank_o__Candidatus_Kerfeldbacteria	OTU8659	0	0	1	0	0	0	1	0	0	0	0	1	0	0	0	0	0	0	1	0	4
d__Bacteria	k__norank_d__Bacteria	p__Nitrospirota	c__Thermodesulfovibrionia	o__norank_c__Thermodesulfovibrionia	f__norank_o__norank_c__Thermodesulfovibrionia	g__norank_f__norank_o__norank_c__Thermodesulfovibrionia	s__uncultured_Nitrospirae_bacterium_g__norank_f__norank_o__norank	OTU1222	3	1	1	0	1	5	3	1	0	4	0	0	0	0	0	0	0	0	0	0	19
d__Bacteria	k__norank_d__Bacteria	p__Chloroflexi	c__Anaerolineae	o__Anaerolineales	f__Anaerolineaceae	g__norank_f__Anaerolineaceae	s__metagenome_g__norank_f__Anaerolineaceae	OTU3317	2	0	1	1	6	0	2	1	0	1	0	0	0	0	0	0	0	0	0	0	14
d__Bacteria	k__norank_d__Bacteria	p__Proteobacteria	c__Alphaproteobacteria	o__norank_c__Alphaproteobacteria	f__norank_o__norank_c__Alphaproteobacteria	g__norank_f__norank_o__norank_c__Alphaproteobacteria	s__uncultured_Rhodobacteraceae_bacterium_g__norank	OTU2856	41	13	3	2	14	15	6	6	1	3	0	0	0	0	0	0	0	0	1	0	105
d__Bacteria	k__norank_d__Bacteria	p__Margulisbacteria	c__norank_p__Margulisbacteria	o__norank_c__norank_p__Margulisbacteria	f__norank_o__norank_c__norank_p__Margulisbacteria	g__norank_f__norank_o__norank_c__norank_p__Margulisbacteria	s__Candidatus_Margulisbacteria_bacterium_GWF2_38_17	OTU4754	0	0	0	0	0	0	0	0	0	2	0	0	0	0	0	0	0	0	0	0	2
d__Bacteria	k__norank_d__Bacteria	p__Bacteroidota	c__Kapabacteria	o__Kapabacteriales	f__norank_o__Kapabacteriales	g__norank_f__norank_o__Kapabacteriales	s__uncultured_bacterium_g__norank_f__norank_o__Kapabacteriales	OTU6572	0	0	0	1	0	0	0	0	0	0	1	0	0	0	0	0	1	0	0	0	3
d__Bacteria	k__norank_d__Bacteria	p__Firmicutes	c__Clostridia	o__norank_c__Clostridia	f__Hungateiclostridiaceae	g__unclassified_f__Hungateiclostridiaceae	s__unclassified_f__Hungateiclostridiaceae	OTU3584	1	0	0	0	0	0	4	0	2	0	0	0	0	0	0	0	0	0	0	0	7
d__Bacteria	k__norank_d__Bacteria	p__Chloroflexi	c__Anaerolineae	o__SBR1031	f__A4b	g__norank_f__A4b	s__uncultured_bacterium_g__norank_f__A4b	OTU4015	0	0	0	0	0	3	1	0	0	1	0	0	0	0	0	0	0	0	0	0	5
d__Bacteria	k__norank_d__Bacteria	p__Chloroflexi	c__Anaerolineae	o__ADurb.Bin180	f__norank_o__ADurb.Bin180	g__norank_f__norank_o__ADurb.Bin180	s__unclassified_g__norank_f__norank_o__ADurb.Bin180	OTU3332	0	0	0	0	0	0	1	0	16	0	0	0	0	0	0	0	0	0	0	0	17
d__Bacteria	k__norank_d__Bacteria	p__Zixibacteria	c__norank_p__Zixibacteria	o__norank_c__norank_p__Zixibacteria	f__norank_o__norank_c__norank_p__Zixibacteria	g__norank_f__norank_o__norank_c__norank_p__Zixibacteria	s__unclassified_g__norank_f__norank_o__norank_c__norank_p__Zixibacteria	OTU6323	2	3	11	2	2	1	3	9	1	10	0	0	0	0	0	0	1	0	0	0	45
d__Bacteria	k__norank_d__Bacteria	p__Zixibacteria	c__norank_p__Zixibacteria	o__norank_c__norank_p__Zixibacteria	f__norank_o__norank_c__norank_p__Zixibacteria	g__norank_f__norank_o__norank_c__norank_p__Zixibacteria	s__unclassified_g__norank_f__norank_o__norank_c__norank_p__Zixibacteria	OTU6321	0	0	0	1	2	0	0	0	1	2	0	0	0	0	0	0	0	0	0	0	6
d__Bacteria	k__norank_d__Bacteria	p__Cyanobacteria	c__Cyanobacteriia	o__Chloroplast	f__norank_o__Chloroplast	g__norank_f__norank_o__Chloroplast	s__Mychonastes_jurisii	OTU3544	0	1	2	0	0	0	0	0	0	0	0	0	2	2	3	1	0	2	0	2	15
d__Bacteria	k__norank_d__Bacteria	p__Bacteroidota	c__Bacteroidia	o__Chitinophagales	f__37-13	g__norank_f__37-13	s__uncultured_bacterium_g__norank_f__37-13	OTU1548	0	0	3	2	0	0	0	1	0	0	0	0	0	0	0	0	0	0	0	0	6
d__Bacteria	k__norank_d__Bacteria	p__Acidobacteriota	c__Subgroup_25	o__norank_c__Subgroup_25	f__norank_o__norank_c__Subgroup_25	g__norank_f__norank_o__norank_c__Subgroup_25	s__uncultured_Acidobacteria_bacterium_g__norank_f__norank_o__norank_c__Subgroup_25	OTU172	3	1	0	0	1	1	2	0	0	0	0	0	0	0	0	0	0	0	0	0	8
d__Bacteria	k__norank_d__Bacteria	p__Armatimonadota	c__Fimbriimonadia	o__Fimbriimonadales	f__Fimbriimonadaceae	g__norank_f__Fimbriimonadaceae	s__uncultured_bacterium_g__norank_f__Fimbriimonadaceae	OTU4536	2	0	0	0	1	1	1	1	0	0	0	0	0	0	0	0	1	0	0	0	7
d__Bacteria	k__norank_d__Bacteria	p__Actinobacteriota	c__Actinobacteria	o__Corynebacteriales	f__Nocardiaceae	g__Rhodococcus	s__Rhodococcus_sp._MTM3W5.2	OTU1073	0	1	1	2	2	0	1	0	0	0	0	0	0	0	0	0	0	0	0	0	7
d__Bacteria	k__norank_d__Bacteria	p__Chloroflexi	c__Anaerolineae	o__Caldilineales	f__Caldilineaceae	g__norank_f__Caldilineaceae	s__uncultured_Anaerolineaceae_bacterium_g__norank_f__Caldilineaceae	OTU3622	8	3	4	5	5	8	4	3	1	1	0	0	0	0	0	0	0	0	0	0	42
d__Bacteria	k__norank_d__Bacteria	p__Myxococcota	c__Polyangia	o__Haliangiales	f__Haliangiaceae	g__Haliangium	s__uncultured_delta_proteobacterium_g__Haliangium	OTU2893	12	4	0	0	9	4	1	2	0	1	0	0	0	0	0	0	0	0	0	0	33
d__Bacteria	k__norank_d__Bacteria	p__Proteobacteria	c__Alphaproteobacteria	o__Rhizobiales	f__Kaistiaceae	g__Kaistia	s__uncultured_bacterium_g__Kaistia	OTU2550	5	4	5	6	2	14	1	0	0	2	0	1	0	0	0	0	0	1	0	0	41
d__Bacteria	k__norank_d__Bacteria	p__Chloroflexi	c__unclassified_p__Chloroflexi	o__unclassified_p__Chloroflexi	f__unclassified_p__Chloroflexi	g__unclassified_p__Chloroflexi	s__unclassified_p__Chloroflexi	OTU4908	0	1	0	0	0	2	0	0	0	0	0	0	0	0	0	0	0	0	0	0	3
d__Bacteria	k__norank_d__Bacteria	p__Cyanobacteria	c__Cyanobacteriia	o__Chloroplast	f__norank_o__Chloroplast	g__norank_f__norank_o__Chloroplast	s__Tetraselmis_sp._CCMP_881	OTU6766	0	0	0	0	0	0	0	0	0	0	0	2	0	0	0	1	0	0	0	0	3
d__Bacteria	k__norank_d__Bacteria	p__Proteobacteria	c__Gammaproteobacteria	o__Xanthomonadales	f__Rhodanobacteraceae	g__norank_f__Rhodanobacteraceae	s__uncultured_bacterium_g__norank_f__Rhodanobacteraceae	OTU348	4	1	0	1	0	1	0	0	0	0	0	0	0	0	0	0	0	0	0	0	7
d__Bacteria	k__norank_d__Bacteria	p__Desulfobacterota	c__Desulfuromonadia	o__PB19	f__norank_o__PB19	g__norank_f__norank_o__PB19	s__unclassified_g__norank_f__norank_o__PB19	OTU1304	2	0	4	1	0	0	1	4	0	4	0	0	0	0	0	0	0	0	0	0	16
d__Bacteria	k__norank_d__Bacteria	p__Chloroflexi	c__Dehalococcoidia	o__GIF9	f__norank_o__GIF9	g__norank_f__norank_o__GIF9	s__unclassified_g__norank_f__norank_o__GIF9	OTU859	0	1	0	0	0	0	1	1	2	0	0	0	0	0	0	0	0	0	0	0	5
d__Bacteria	k__norank_d__Bacteria	p__Chloroflexi	c__Anaerolineae	o__SBR1031	f__A4b	g__norank_f__A4b	s__metagenome_g__norank_f__A4b	OTU39	3	1	6	0	1	0	0	0	0	0	0	0	0	1	0	0	0	0	0	0	12
d__Bacteria	k__norank_d__Bacteria	p__Patescibacteria	c__Saccharimonadia	o__Saccharimonadales	f__norank_o__Saccharimonadales	g__norank_f__norank_o__Saccharimonadales	s__unclassified_g__norank_f__norank_o__Saccharimonadales	OTU9070	0	0	0	0	0	0	0	0	0	0	0	0	0	0	0	0	0	0	2	2	4
d__Bacteria	k__norank_d__Bacteria	p__Bacteroidota	c__Bacteroidia	o__Sphingobacteriales	f__env.OPS_17	g__norank_f__env.OPS_17	s__uncultured_bacterium_g__norank_f__env.OPS_17	OTU6793	0	0	0	0	0	0	0	0	0	0	0	4	0	0	0	0	0	0	0	0	4
d__Bacteria	k__norank_d__Bacteria	p__Planctomycetota	c__Planctomycetes	o__Gemmatales	f__Gemmataceae	g__norank_f__Gemmataceae	s__uncultured_bacterium_g__norank_f__Gemmataceae	OTU1919	1	0	0	0	2	1	0	0	0	0	0	0	0	0	0	0	0	0	0	0	4
d__Bacteria	k__norank_d__Bacteria	p__Proteobacteria	c__Alphaproteobacteria	o__Rhizobiales	f__Hyphomicrobiaceae	g__Pedomicrobium	s__metagenome_g__Pedomicrobium	OTU2501	15	12	7	13	20	17	9	15	6	12	0	0	1	3	0	0	0	0	1	0	131
d__Bacteria	k__norank_d__Bacteria	p__Acidobacteriota	c__Vicinamibacteria	o__Vicinamibacterales	f__norank_o__Vicinamibacterales	g__norank_f__norank_o__Vicinamibacterales	s__uncultured_Acidobacteria_bacterium_g__norank_f__norank_o__Vicinamibacterales	OTU4442	14	1	0	0	0	27	4	1	0	4	0	0	0	0	0	0	0	0	0	0	51
d__Bacteria	k__norank_d__Bacteria	p__Chloroflexi	c__unclassified_p__Chloroflexi	o__unclassified_p__Chloroflexi	f__unclassified_p__Chloroflexi	g__unclassified_p__Chloroflexi	s__unclassified_p__Chloroflexi	OTU2760	1	0	0	0	0	3	0	0	0	0	0	0	0	0	0	0	0	0	0	0	4
d__Bacteria	k__norank_d__Bacteria	p__Chloroflexi	c__Anaerolineae	o__Ardenticatenales	f__norank_o__Ardenticatenales	g__norank_f__norank_o__Ardenticatenales	s__uncultured_archaeon_g__norank_f__norank_o__Ardenticatenales	OTU2758	3	0	1	2	0	22	2	0	0	0	0	0	0	0	0	0	0	0	0	0	30
d__Bacteria	k__norank_d__Bacteria	p__Chloroflexi	c__Anaerolineae	o__SBR1031	f__A4b	g__norank_f__A4b	s__uncultured_sludge_bacterium_H8	OTU4257	23	5	3	1	6	5	7	6	0	2	1	0	0	0	1	0	0	0	0	0	60
d__Bacteria	k__norank_d__Bacteria	p__Proteobacteria	c__Alphaproteobacteria	o__Rhizobiales	f__Hyphomicrobiaceae	g__unclassified_f__Hyphomicrobiaceae	s__unclassified_f__Hyphomicrobiaceae	OTU5665	12	6	7	11	41	8	24	19	22	18	1	0	0	0	0	1	1	0	1	0	172
d__Bacteria	k__norank_d__Bacteria	p__Verrucomicrobiota	c__Chlamydiae	o__Chlamydiales	f__unclassified_o__Chlamydiales	g__unclassified_o__Chlamydiales	s__unclassified_o__Chlamydiales	OTU244	1	0	1	0	0	0	0	0	0	0	0	0	0	0	0	0	0	0	0	0	2
d__Bacteria	k__norank_d__Bacteria	p__Chloroflexi	c__Anaerolineae	o__SBR1031	f__norank_o__SBR1031	g__norank_f__norank_o__SBR1031	s__uncultured_bacterium_g__norank_f__norank_o__SBR1031	OTU4117	12	52	34	57	10	5	78	19	12	11	0	0	0	0	0	0	0	0	1	0	291
d__Bacteria	k__norank_d__Bacteria	p__Acidobacteriota	c__Blastocatellia	o__DS-100	f__norank_o__DS-100	g__norank_f__norank_o__DS-100	s__uncultured_bacterium_g__norank_f__norank_o__DS-100	OTU4713	30	5	34	7	9	16	7	23	0	3	2	1	1	3	1	0	0	0	0	0	142
d__Bacteria	k__norank_d__Bacteria	p__Firmicutes	c__Clostridia	o__Clostridiales	f__Clostridiaceae	g__Clostridium_sensu_stricto_1	s__unclassified_g__Clostridium_sensu_stricto_1	OTU8520	3	3	1	5	5	3	4	3	5	3	1	6	0	1	2	2	6	0	5	4	62
d__Bacteria	k__norank_d__Bacteria	p__Acidobacteriota	c__Thermoanaerobaculia	o__Thermoanaerobaculales	f__Thermoanaerobaculaceae	g__Subgroup_10	s__uncultured_bacterium_g__Subgroup_10	OTU3180	0	0	0	0	0	4	1	0	0	0	0	0	0	0	0	0	0	0	0	0	5
d__Bacteria	k__norank_d__Bacteria	p__unclassified_k__norank_d__Bacteria	c__unclassified_k__norank_d__Bacteria	o__unclassified_k__norank_d__Bacteria	f__unclassified_k__norank_d__Bacteria	g__unclassified_k__norank_d__Bacteria	s__unclassified_k__norank_d__Bacteria	OTU3928	0	0	0	0	0	0	1	0	0	0	0	0	0	0	0	0	0	0	0	0	1
d__Bacteria	k__norank_d__Bacteria	p__Acidobacteriota	c__Subgroup_5	o__norank_c__Subgroup_5	f__norank_o__norank_c__Subgroup_5	g__norank_f__norank_o__norank_c__Subgroup_5	s__uncultured_Acidobacteria_bacterium_g__norank_f__norank_o__norank_c__Subgroup_5	OTU6224	2	0	0	0	0	3	6	0	0	3	0	0	0	0	0	1	0	0	2	0	17
d__Bacteria	k__norank_d__Bacteria	p__Spirochaetota	c__Leptospirae	o__Leptospirales	f__Leptospiraceae	g__RBG-16-49-21	s__unclassified_g__RBG-16-49-21	OTU688	0	1	0	1	0	1	0	0	0	0	0	0	0	0	0	0	0	0	0	0	3
d__Bacteria	k__norank_d__Bacteria	p__Bacteroidota	c__Bacteroidia	o__Bacteroidales	f__Dysgonomonadaceae	g__norank_f__Dysgonomonadaceae	s__unclassified_g__norank_f__Dysgonomonadaceae	OTU1066	0	2	1	1	0	0	0	0	0	0	0	0	0	2	1	0	0	1	0	0	8
d__Bacteria	k__norank_d__Bacteria	p__Proteobacteria	c__Gammaproteobacteria	o__Burkholderiales	f__unclassified_o__Burkholderiales	g__unclassified_o__Burkholderiales	s__unclassified_o__Burkholderiales	OTU4876	0	0	0	0	1	0	0	2	0	0	0	0	0	0	0	0	0	0	0	0	3
d__Bacteria	k__norank_d__Bacteria	p__Bacteroidota	c__Bacteroidia	o__Cytophagales	f__Microscillaceae	g__OLB12	s__uncultured_bacterium_g__OLB12	OTU3399	29	102	29	42	21	5	24	18	22	53	0	1	1	4	1	2	1	3	11	3	372
d__Bacteria	k__norank_d__Bacteria	p__Cyanobacteria	c__Vampirivibrionia	o__Gastranaerophilales	f__norank_o__Gastranaerophilales	g__norank_f__norank_o__Gastranaerophilales	s__uncultured_organism_g__norank_f__norank_o__Gastranaerophilales	OTU8353	0	0	0	0	0	0	0	0	0	0	0	0	0	0	0	0	0	0	2	0	2
d__Bacteria	k__norank_d__Bacteria	p__Myxococcota	c__Polyangia	o__Polyangiales	f__Sandaracinaceae	g__norank_f__Sandaracinaceae	s__uncultured_bacterium_g__norank_f__Sandaracinaceae	OTU4462	0	0	5	1	0	0	0	1	0	0	0	0	0	0	0	0	0	0	0	0	7
d__Bacteria	k__norank_d__Bacteria	p__Patescibacteria	c__Dojkabacteria	o__norank_c__Dojkabacteria	f__norank_o__norank_c__Dojkabacteria	g__norank_f__norank_o__norank_c__Dojkabacteria	s__uncultured_prokaryote_g__norank_f__norank_o__norank_c__Dojkabacteria	OTU7623	0	1	0	0	0	0	0	0	0	0	0	1	0	1	1	0	0	0	2	1	7
d__Bacteria	k__norank_d__Bacteria	p__Proteobacteria	c__Gammaproteobacteria	o__Burkholderiales	f__Comamonadaceae	g__Curvibacter	s__uncultured_bacterium_g__Curvibacter	OTU1024	0	6	17	5	1	0	0	1	4	0	3	12	19	12	16	6	8	11	17	16	154
d__Bacteria	k__norank_d__Bacteria	p__Firmicutes	c__Bacilli	o__Alicyclobacillales	f__Alicyclobacillaceae	g__Tumebacillus	s__uncultured_bacterium_g__Tumebacillus	OTU2520	0	0	0	0	0	1	0	0	0	0	0	0	0	0	0	0	0	0	0	0	1
d__Bacteria	k__norank_d__Bacteria	p__Sva0485	c__norank_p__Sva0485	o__norank_c__norank_p__Sva0485	f__norank_o__norank_c__norank_p__Sva0485	g__norank_f__norank_o__norank_c__norank_p__Sva0485	s__unclassified_g__norank_f__norank_o__norank_c__norank_p__Sva0485	OTU5619	0	0	0	0	0	0	0	0	2	0	0	0	0	0	0	0	0	0	0	0	2
d__Bacteria	k__norank_d__Bacteria	p__Spirochaetota	c__Spirochaetia	o__Spirochaetales	f__Spirochaetaceae	g__Spirochaeta	s__unclassified_g__Spirochaeta	OTU5336	0	0	0	1	1	0	2	0	1	1	0	0	0	0	0	0	0	0	0	0	6
d__Bacteria	k__norank_d__Bacteria	p__Bdellovibrionota	c__Bdellovibrionia	o__Bdellovibrionales	f__Bdellovibrionaceae	g__Bdellovibrio	s__Bdellovibrio_exovorus_JSS	OTU6950	0	0	0	0	0	0	0	0	0	0	0	0	3	0	0	0	0	0	0	1	4
d__Bacteria	k__norank_d__Bacteria	p__Acidobacteriota	c__Vicinamibacteria	o__Subgroup_17	f__norank_o__Subgroup_17	g__norank_f__norank_o__Subgroup_17	s__unclassified_g__norank_f__norank_o__Subgroup_17	OTU7566	2	0	0	0	1	6	0	0	0	0	0	0	0	0	0	1	0	0	0	0	10
d__Bacteria	k__norank_d__Bacteria	p__unclassified_k__norank_d__Bacteria	c__unclassified_k__norank_d__Bacteria	o__unclassified_k__norank_d__Bacteria	f__unclassified_k__norank_d__Bacteria	g__unclassified_k__norank_d__Bacteria	s__unclassified_k__norank_d__Bacteria	OTU4593	0	0	0	0	0	0	0	2	0	0	0	0	0	0	0	0	0	0	0	0	2
d__Bacteria	k__norank_d__Bacteria	p__Actinobacteriota	c__Thermoleophilia	o__Solirubrobacterales	f__67-14	g__norank_f__67-14	s__unclassified_g__norank_f__67-14	OTU5327	12	4	2	6	3	53	19	6	12	8	0	0	0	0	0	0	0	0	1	0	126
d__Bacteria	k__norank_d__Bacteria	p__Patescibacteria	c__Saccharimonadia	o__Saccharimonadales	f__WWH38	g__norank_f__WWH38	s__uncultured_bacterium_g__norank_f__WWH38	OTU7837	1	0	0	0	1	0	0	1	0	0	0	0	0	0	0	1	1	0	0	0	5
d__Bacteria	k__norank_d__Bacteria	p__Chloroflexi	c__Anaerolineae	o__Anaerolineales	f__Anaerolineaceae	g__norank_f__Anaerolineaceae	s__unclassified_g__norank_f__Anaerolineaceae	OTU2576	0	0	0	0	0	1	1	1	0	0	0	0	0	0	0	1	0	0	0	0	4
d__Bacteria	k__norank_d__Bacteria	p__Gemmatimonadota	c__Gemmatimonadetes	o__Gemmatimonadales	f__Gemmatimonadaceae	g__norank_f__Gemmatimonadaceae	s__unclassified_g__norank_f__Gemmatimonadaceae	OTU2386	0	2	0	0	0	3	0	0	0	0	0	0	0	0	0	0	0	0	0	0	5
d__Bacteria	k__norank_d__Bacteria	p__Verrucomicrobiota	c__Verrucomicrobiae	o__Pedosphaerales	f__Pedosphaeraceae	g__ADurb.Bin063-1	s__unclassified_g__ADurb.Bin063-1	OTU2439	2	1	0	1	1	1	0	0	0	1	1	1	2	0	0	0	0	0	0	0	11
d__Bacteria	k__norank_d__Bacteria	p__Calditrichota	c__Calditrichia	o__Calditrichales	f__Calditrichaceae	g__norank_f__Calditrichaceae	s__unclassified_g__norank_f__Calditrichaceae	OTU5826	0	1	0	0	0	0	5	0	6	3	0	0	0	0	0	0	0	0	0	0	15
d__Bacteria	k__norank_d__Bacteria	p__SAR324_cladeMarine_group_B	c__norank_p__SAR324_cladeMarine_group_B	o__norank_c__norank_p__SAR324_cladeMarine_group_B	f__norank_o__norank_c__norank_p__SAR324_cladeMarine_group_B	g__norank_f__norank_o__norank_c__norank_p__SAR324_cladeMarine_group_B	s__unclassified_g__norank_f__norank_o__norank_c__norank_p__SAR324_cladeMarine_group_B	OTU1401	0	0	0	2	1	0	0	0	0	2	0	0	0	0	0	0	0	0	0	0	5
d__Bacteria	k__norank_d__Bacteria	p__Patescibacteria	c__Gracilibacteria	o__JGI_0000069-P22	f__norank_o__JGI_0000069-P22	g__norank_f__norank_o__JGI_0000069-P22	s__uncultured_bacterium_g__norank_f__norank_o__JGI_0000069-P22	OTU4645	0	0	0	0	0	0	0	1	0	0	1	0	0	0	0	0	0	0	0	0	2
d__Bacteria	k__norank_d__Bacteria	p__Schekmanbacteria	c__norank_p__Schekmanbacteria	o__norank_c__norank_p__Schekmanbacteria	f__norank_o__norank_c__norank_p__Schekmanbacteria	g__norank_f__norank_o__norank_c__norank_p__Schekmanbacteria	s__uncultured_Syntrophobacterales_bacterium_g__norank	OTU2229	0	0	0	0	0	2	0	0	1	0	0	0	0	0	0	0	0	0	0	0	3
d__Bacteria	k__norank_d__Bacteria	p__Campilobacterota	c__Campylobacteria	o__Campylobacterales	f__Sulfurimonadaceae	g__Thiovulum	s__uncultured_bacterium_g__Thiovulum	OTU6952	0	0	0	0	0	0	0	0	0	0	0	0	1	1	0	0	0	1	0	0	3
d__Bacteria	k__norank_d__Bacteria	p__Planctomycetota	c__Planctomycetes	o__Gemmatales	f__Gemmataceae	g__norank_f__Gemmataceae	s__uncultured_bacterium_g__norank_f__Gemmataceae	OTU25	4	0	0	0	1	2	0	0	0	1	0	0	0	0	0	0	0	0	0	0	8
d__Bacteria	k__norank_d__Bacteria	p__Chloroflexi	c__JG30-KF-CM66	o__norank_c__JG30-KF-CM66	f__norank_o__norank_c__JG30-KF-CM66	g__norank_f__norank_o__norank_c__JG30-KF-CM66	s__unclassified_g__norank_f__norank_o__norank_c__JG30-KF-CM66	OTU1392	55	5	59	36	6	67	28	38	4	4	0	0	0	0	0	0	0	0	0	1	303
d__Bacteria	k__norank_d__Bacteria	p__Myxococcota	c__bacteriap25	o__norank_c__bacteriap25	f__norank_o__norank_c__bacteriap25	g__norank_f__norank_o__norank_c__bacteriap25	s__uncultured_delta_proteobacterium_g__norank_f__norank_o__norank_c__bacteriap25	OTU2426	0	0	0	0	0	3	0	0	0	0	0	0	0	0	0	0	0	0	0	0	3
d__Bacteria	k__norank_d__Bacteria	p__Proteobacteria	c__Alphaproteobacteria	o__Rickettsiales	f__SM2D12	g__norank_f__SM2D12	s__unclassified_g__norank_f__SM2D12	OTU4478	0	0	0	0	0	0	0	2	0	0	0	0	0	0	0	0	0	0	0	0	2
d__Bacteria	k__norank_d__Bacteria	p__Patescibacteria	c__Saccharimonadia	o__Saccharimonadales	f__Saccharimonadaceae	g__TM7a	s__uncultured_bacterium_g__TM7a	OTU861	1	2	0	0	0	0	1	0	0	0	0	0	1	0	0	0	0	0	0	0	5
d__Bacteria	k__norank_d__Bacteria	p__Proteobacteria	c__Gammaproteobacteria	o__CHAB-XI-27	f__norank_o__CHAB-XI-27	g__norank_f__norank_o__CHAB-XI-27	s__uncultured_bacterium_g__norank_f__norank_o__CHAB-XI-27	OTU8140	0	0	0	0	0	0	0	0	0	0	0	0	0	0	0	1	0	1	0	0	2
d__Bacteria	k__norank_d__Bacteria	p__Acidobacteriota	c__Subgroup_18	o__norank_c__Subgroup_18	f__norank_o__norank_c__Subgroup_18	g__norank_f__norank_o__norank_c__Subgroup_18	s__unclassified_g__norank_f__norank_o__norank_c__Subgroup_18	OTU5277	2	1	1	1	0	3	12	6	45	11	0	0	1	1	0	0	0	0	0	0	84
d__Bacteria	k__norank_d__Bacteria	p__Verrucomicrobiota	c__Omnitrophia	o__Omnitrophales	f__Omnitrophaceae	g__Candidatus_Omnitrophus	s__unclassified_g__Candidatus_Omnitrophus	OTU815	1	1	1	1	0	0	0	0	2	0	0	0	0	0	0	0	0	0	0	0	6
d__Bacteria	k__norank_d__Bacteria	p__Acidobacteriota	c__Holophagae	o__Subgroup_7	f__norank_o__Subgroup_7	g__norank_f__norank_o__Subgroup_7	s__unclassified_g__norank_f__norank_o__Subgroup_7	OTU4236	0	1	1	0	5	0	0	2	1	1	0	0	0	0	0	0	0	0	0	0	11
d__Bacteria	k__norank_d__Bacteria	p__unclassified_k__norank_d__Bacteria	c__unclassified_k__norank_d__Bacteria	o__unclassified_k__norank_d__Bacteria	f__unclassified_k__norank_d__Bacteria	g__unclassified_k__norank_d__Bacteria	s__unclassified_k__norank_d__Bacteria	OTU5173	0	0	0	0	0	0	0	0	2	0	0	0	0	0	0	0	0	0	0	0	2
d__Bacteria	k__norank_d__Bacteria	p__Proteobacteria	c__Gammaproteobacteria	o__unclassified_c__Gammaproteobacteria	f__unclassified_c__Gammaproteobacteria	g__unclassified_c__Gammaproteobacteria	s__unclassified_c__Gammaproteobacteria	OTU7754	0	0	0	0	0	0	0	0	0	0	0	0	0	0	0	0	2	0	0	0	2
d__Bacteria	k__norank_d__Bacteria	p__SAR324_cladeMarine_group_B	c__norank_p__SAR324_cladeMarine_group_B	o__norank_c__norank_p__SAR324_cladeMarine_group_B	f__norank_o__norank_c__norank_p__SAR324_cladeMarine_group_B	g__norank_f__norank_o__norank_c__norank_p__SAR324_cladeMarine_group_B	s__unclassified_g__norank_f__norank_o__norank_c__norank_p__SAR324_cladeMarine_group_B	OTU5524	0	0	0	0	0	0	0	2	1	0	0	0	0	0	0	0	0	0	0	0	3
d__Bacteria	k__norank_d__Bacteria	p__Acidobacteriota	c__Vicinamibacteria	o__Vicinamibacterales	f__norank_o__Vicinamibacterales	g__norank_f__norank_o__Vicinamibacterales	s__unclassified_g__norank_f__norank_o__Vicinamibacterales	OTU3460	0	0	0	0	0	26	1	0	0	0	0	0	0	0	0	0	0	0	0	0	27
d__Bacteria	k__norank_d__Bacteria	p__Myxococcota	c__Polyangia	o__Polyangiales	f__Polyangiaceae	g__Labilithrix	s__Racemicystis_crocea	OTU6289	8	0	7	2	6	2	3	7	5	6	0	0	0	1	0	0	0	0	0	0	47
d__Bacteria	k__norank_d__Bacteria	p__Verrucomicrobiota	c__Chlamydiae	o__Chlamydiales	f__Parachlamydiaceae	g__Neochlamydia	s__uncultured_bacterium_g__Neochlamydia	OTU5766	1	0	1	0	1	0	1	0	0	0	0	0	0	0	0	0	0	0	0	0	4
d__Bacteria	k__norank_d__Bacteria	p__Bacteroidota	c__Bacteroidia	o__Flavobacteriales	f__Flavobacteriaceae	g__Flavobacterium	s__Flavobacterium_sp._g__Flavobacterium	OTU1232	2	0	20	4	3	0	0	0	0	0	5	0	0	2	1	0	0	0	0	0	37
d__Bacteria	k__norank_d__Bacteria	p__Desulfobacterota	c__norank_p__Desulfobacterota	o__norank_c__norank_p__Desulfobacterota	f__norank_o__norank_c__norank_p__Desulfobacterota	g__norank_f__norank_o__norank_c__norank_p__Desulfobacterota	s__unclassified_g__norank_f__norank_o__norank_c__norank_p__Desulfobacterota	OTU1687	0	0	0	1	0	1	0	0	1	0	0	0	0	0	0	0	0	0	0	0	3
d__Bacteria	k__norank_d__Bacteria	p__Bacteroidota	c__Rhodothermia	o__Rhodothermales	f__Rhodothermaceae	g__norank_f__Rhodothermaceae	s__uncultured_Cytophaga_sp._g__norank_f__Rhodothermaceae	OTU5863	0	0	0	0	2	0	1	2	0	2	0	0	1	0	0	1	1	1	2	1	14
d__Bacteria	k__norank_d__Bacteria	p__Planctomycetota	c__OM190	o__norank_c__OM190	f__norank_o__norank_c__OM190	g__norank_f__norank_o__norank_c__OM190	s__uncultured_bacterium_g__norank_f__norank_o__norank_c__OM190	OTU469	0	1	0	1	1	0	0	0	1	0	0	0	0	0	0	0	0	0	0	0	4
d__Bacteria	k__norank_d__Bacteria	p__Actinobacteriota	c__WCHB1-81	o__norank_c__WCHB1-81	f__norank_o__norank_c__WCHB1-81	g__norank_f__norank_o__norank_c__WCHB1-81	s__uncultured_bacterium_g__norank_f__norank_o__norank_c__WCHB1-81	OTU5357	0	0	2	0	0	0	1	0	11	0	0	0	0	0	0	0	0	0	0	0	14
d__Bacteria	k__norank_d__Bacteria	p__Proteobacteria	c__Gammaproteobacteria	o__Beggiatoales	f__Beggiatoaceae	g__unclassified_f__Beggiatoaceae	s__unclassified_f__Beggiatoaceae	OTU6941	0	0	0	0	0	0	0	0	0	0	0	0	1	0	0	0	0	1	0	0	2
d__Bacteria	k__norank_d__Bacteria	p__Acidobacteriota	c__Holophagae	o__Subgroup_7	f__norank_o__Subgroup_7	g__norank_f__norank_o__Subgroup_7	s__unclassified_g__norank_f__norank_o__Subgroup_7	OTU6363	0	0	0	0	0	0	0	0	0	1	0	0	0	0	0	0	0	0	0	0	1
d__Bacteria	k__norank_d__Bacteria	p__Chloroflexi	c__Anaerolineae	o__SBR1031	f__norank_o__SBR1031	g__norank_f__norank_o__SBR1031	s__uncultured_bacterium_g__norank_f__norank_o__SBR1031	OTU407	25	3	1	0	2	2	2	3	0	0	0	0	1	0	0	0	0	0	0	0	39
d__Bacteria	k__norank_d__Bacteria	p__Bacteroidota	c__Bacteroidia	o__Sphingobacteriales	f__Sphingobacteriaceae	g__Sphingobacterium	s__Sphingobacterium_bambusae	OTU8476	0	0	0	0	0	0	0	0	0	0	0	0	0	0	1	1	2	6	0	3	13
d__Bacteria	k__norank_d__Bacteria	p__Myxococcota	c__Polyangia	o__Polyangiales	f__BIrii41	g__norank_f__BIrii41	s__uncultured_bacterium_g__norank_f__BIrii41	OTU6248	0	0	0	0	0	0	0	0	0	6	0	0	0	0	0	0	0	0	0	0	6
d__Bacteria	k__norank_d__Bacteria	p__Proteobacteria	c__Alphaproteobacteria	o__Rhodospirillales	f__Rhodospirillaceae	g__Novispirillum	s__Novispirillum_itersonii	OTU8518	0	1	0	0	0	0	0	0	0	0	2	1	1	0	0	8	9	6	14	21	63
d__Bacteria	k__norank_d__Bacteria	p__Firmicutes	c__Limnochordia	o__norank_c__Limnochordia	f__norank_o__norank_c__Limnochordia	g__Hydrogenispora	s__uncultured_bacterium_g__Hydrogenispora	OTU5448	4	3	3	0	2	5	3	2	6	4	0	0	0	0	0	0	0	0	0	0	32
d__Bacteria	k__norank_d__Bacteria	p__Verrucomicrobiota	c__Omnitrophia	o__Omnitrophales	f__Omnitrophaceae	g__Candidatus_Omnitrophus	s__unclassified_g__Candidatus_Omnitrophus	OTU9069	0	0	0	1	0	0	0	0	0	0	0	1	0	0	0	0	0	0	0	1	3
d__Bacteria	k__norank_d__Bacteria	p__Proteobacteria	c__Gammaproteobacteria	o__Enterobacterales	f__unclassified_o__Enterobacterales	g__unclassified_o__Enterobacterales	s__unclassified_o__Enterobacterales	OTU4790	0	0	0	0	0	0	0	0	0	0	0	0	0	0	0	0	0	0	1	0	1
d__Bacteria	k__norank_d__Bacteria	p__Bacteroidota	c__Bacteroidia	o__Flavobacteriales	f__Flavobacteriaceae	g__Flavobacterium	s__unclassified_g__Flavobacterium	OTU2065	0	0	0	0	2	0	0	0	0	0	0	0	0	0	0	0	0	0	0	0	2
d__Bacteria	k__norank_d__Bacteria	p__Bacteroidota	c__Bacteroidia	o__Sphingobacteriales	f__AKYH767	g__norank_f__AKYH767	s__uncultured_Bacteroidetes_bacterium_g__norank_f__AKYH767	OTU4115	1	0	0	0	0	0	5	1	0	0	0	0	0	0	0	0	0	0	0	0	7
d__Bacteria	k__norank_d__Bacteria	p__Bacteroidota	c__Bacteroidia	o__Bacteroidales	f__FTLpost3	g__norank_f__FTLpost3	s__uncultured_Bacteroidetes_bacterium_g__norank_f__FTLpost3	OTU8083	0	0	0	0	0	0	0	0	0	0	0	0	0	0	1	0	0	1	0	0	2
d__Bacteria	k__norank_d__Bacteria	p__Patescibacteria	c__Parcubacteria	o__Candidatus_Kaiserbacteria	f__norank_o__Candidatus_Kaiserbacteria	g__norank_f__norank_o__Candidatus_Kaiserbacteria	s__uncultured_bacterium_g__norank_f__norank_o__Candidatus_Kaiserbacteria	OTU323	6	0	0	0	0	0	0	0	0	0	0	0	0	0	0	0	0	2	0	0	8
d__Bacteria	k__norank_d__Bacteria	p__Bacteroidota	c__Kryptonia	o__Kryptoniales	f__BSV26	g__norank_f__BSV26	s__uncultured_Chlorobi_bacterium_g__norank_f__BSV26	OTU386	1	0	1	0	0	3	0	0	0	0	0	0	0	0	0	0	0	0	0	0	5
d__Bacteria	k__norank_d__Bacteria	p__Bacteroidota	c__Bacteroidia	o__Flavobacteriales	f__Weeksellaceae	g__Bergeyella	s__uncultured_bacterium_g__Bergeyella	OTU7445	0	0	0	0	0	0	0	0	0	0	1	3	2	4	2	0	0	0	0	1	13
d__Bacteria	k__norank_d__Bacteria	p__Desulfobacterota	c__Desulfomonilia	o__Desulfomonilales	f__Desulfomonilaceae	g__Desulfomonile	s__uncultured_bacterium_g__Desulfomonile	OTU4281	0	0	1	2	2	2	1	3	10	3	0	0	0	0	0	0	0	0	0	0	24
d__Bacteria	k__norank_d__Bacteria	p__Bacteroidota	c__Bacteroidia	o__Bacteroidales	f__Bacteroidetes_vadinHA17	g__norank_f__Bacteroidetes_vadinHA17	s__unclassified_g__norank_f__Bacteroidetes_vadinHA17	OTU1470	0	0	0	2	4	0	1	1	6	0	0	0	0	0	0	0	0	0	0	0	14
d__Bacteria	k__norank_d__Bacteria	p__Cyanobacteria	c__Cyanobacteriia	o__Chloroplast	f__norank_o__Chloroplast	g__norank_f__norank_o__Chloroplast	s__uncultured_bacterium_g__norank_f__norank_o__Chloroplast	OTU7156	0	0	1	0	0	0	0	0	0	0	1	3	3	3	2	1	0	0	0	1	15
d__Bacteria	k__norank_d__Bacteria	p__Bacteroidota	c__Bacteroidia	o__Bacteroidales	f__Bacteroidetes_vadinHA17	g__norank_f__Bacteroidetes_vadinHA17	s__unclassified_g__norank_f__Bacteroidetes_vadinHA17	OTU1476	2	11	4	16	12	1	8	2	7	1	0	0	0	0	0	0	0	0	0	0	64
d__Bacteria	k__norank_d__Bacteria	p__Acidobacteriota	c__Thermoanaerobaculia	o__Thermoanaerobaculales	f__Thermoanaerobaculaceae	g__Thermoanaerobaculum	s__unclassified_g__Thermoanaerobaculum	OTU5122	0	0	0	6	3	1	6	6	38	11	0	0	0	0	0	0	0	0	0	0	71
d__Bacteria	k__norank_d__Bacteria	p__Chloroflexi	c__Chloroflexia	o__Chloroflexales	f__Roseiflexaceae	g__unclassified_f__Roseiflexaceae	s__unclassified_f__Roseiflexaceae	OTU522	2	1	0	0	0	0	1	0	0	0	0	0	0	0	0	0	0	0	0	0	4
d__Bacteria	k__norank_d__Bacteria	p__Acidobacteriota	c__Acidobacteriae	o__Bryobacterales	f__Bryobacteraceae	g__Bryobacter	s__unclassified_g__Bryobacter	OTU2504	0	1	0	2	6	3	9	1	4	0	0	0	0	0	0	1	0	0	1	0	28
d__Bacteria	k__norank_d__Bacteria	p__Patescibacteria	c__Parcubacteria	o__Candidatus_Kaiserbacteria	f__norank_o__Candidatus_Kaiserbacteria	g__norank_f__norank_o__Candidatus_Kaiserbacteria	s__unclassified_g__norank_f__norank_o__Candidatus_Kaiserbacteria	OTU8772	0	0	0	0	0	0	0	0	0	0	0	0	0	0	0	0	1	1	0	2	4
d__Bacteria	k__norank_d__Bacteria	p__Firmicutes	c__Bacilli	o__Thermoactinomycetales	f__Thermoactinomycetaceae	g__Baia	s__uncultured_bacterium_g__Baia	OTU3193	0	0	0	0	0	2	0	0	0	0	0	0	0	0	0	0	0	1	0	1	4
d__Bacteria	k__norank_d__Bacteria	p__Acidobacteriota	c__Vicinamibacteria	o__Vicinamibacterales	f__Vicinamibacteraceae	g__norank_f__Vicinamibacteraceae	s__uncultured_Acidobacteriaceae_bacterium_g__norank_f__Vicinamibacteraceae	OTU6405	8	3	1	1	1	27	1	1	2	2	0	0	0	0	0	0	0	0	0	0	47
d__Bacteria	k__norank_d__Bacteria	p__unclassified_k__norank_d__Bacteria	c__unclassified_k__norank_d__Bacteria	o__unclassified_k__norank_d__Bacteria	f__unclassified_k__norank_d__Bacteria	g__unclassified_k__norank_d__Bacteria	s__unclassified_k__norank_d__Bacteria	OTU2782	0	0	0	0	0	4	2	0	0	0	0	0	0	0	0	0	0	0	0	0	6
d__Bacteria	k__norank_d__Bacteria	p__Firmicutes	c__Clostridia	o__Clostridiales	f__Oxobacteraceae	g__Oxobacter	s__unidentified_eubacterium_clone_BSV50	OTU2872	0	0	0	0	0	4	0	0	0	0	0	0	0	0	0	0	0	0	0	0	4
d__Bacteria	k__norank_d__Bacteria	p__unclassified_k__norank_d__Bacteria	c__unclassified_k__norank_d__Bacteria	o__unclassified_k__norank_d__Bacteria	f__unclassified_k__norank_d__Bacteria	g__unclassified_k__norank_d__Bacteria	s__unclassified_k__norank_d__Bacteria	OTU2789	2	7	1	1	0	0	6	0	2	0	0	0	0	0	0	0	0	0	0	0	19
d__Bacteria	k__norank_d__Bacteria	p__Chloroflexi	c__TK10	o__norank_c__TK10	f__norank_o__norank_c__TK10	g__norank_f__norank_o__norank_c__TK10	s__uncultured_bacterium_g__norank_f__norank_o__norank_c__TK10	OTU2955	1	0	0	0	0	2	0	0	0	0	0	0	0	0	0	0	0	0	0	0	3
d__Bacteria	k__norank_d__Bacteria	p__Bacteroidota	c__Bacteroidia	o__Bacteroidales	f__Prolixibacteraceae	g__BSV13	s__uncultured_bacterium_g__BSV13	OTU1863	1	10	0	2	3	0	1	1	0	0	1	0	2	0	0	0	0	0	0	0	21
d__Bacteria	k__norank_d__Bacteria	p__Bacteroidota	c__Bacteroidia	o__Bacteroidales	f__Paludibacteraceae	g__norank_f__Paludibacteraceae	s__uncultured_soil_bacterium_g__norank_f__Paludibacteraceae	OTU1503	0	0	0	13	0	0	0	0	0	0	0	0	0	0	0	0	0	0	0	0	13
d__Bacteria	k__norank_d__Bacteria	p__Firmicutes	c__Clostridia	o__Lachnospirales	f__Lachnospiraceae	g__Cellulosilyticum	s__unclassified_g__Cellulosilyticum	OTU3960	2	2	0	1	0	0	1	3	6	1	0	0	1	0	0	1	0	1	0	2	21
d__Bacteria	k__norank_d__Bacteria	p__Planctomycetota	c__Phycisphaerae	o__Phycisphaerales	f__Phycisphaeraceae	g__norank_f__Phycisphaeraceae	s__uncultured_bacterium_g__norank_f__Phycisphaeraceae	OTU5868	0	0	0	0	0	0	0	0	0	3	0	0	0	0	0	0	0	0	0	0	3
d__Bacteria	k__norank_d__Bacteria	p__unclassified_k__norank_d__Bacteria	c__unclassified_k__norank_d__Bacteria	o__unclassified_k__norank_d__Bacteria	f__unclassified_k__norank_d__Bacteria	g__unclassified_k__norank_d__Bacteria	s__unclassified_k__norank_d__Bacteria	OTU5782	0	0	0	0	0	0	0	0	0	2	0	0	0	0	0	1	0	0	1	1	5
d__Bacteria	k__norank_d__Bacteria	p__Bacteroidota	c__Bacteroidia	o__Chitinophagales	f__Saprospiraceae	g__norank_f__Saprospiraceae	s__uncultured_bacterium_g__norank_f__Saprospiraceae	OTU4880	3	0	38	39	45	1	0	18	60	8	0	0	0	0	0	0	0	0	1	0	213
d__Bacteria	k__norank_d__Bacteria	p__Planctomycetota	c__Phycisphaerae	o__Phycisphaerales	f__AKAU3564_sediment_group	g__norank_f__AKAU3564_sediment_group	s__uncultured_bacterium_g__norank_f__AKAU3564_sediment_group	OTU2281	0	0	0	0	0	2	0	0	0	0	0	0	0	0	0	0	0	0	0	0	2
d__Bacteria	k__norank_d__Bacteria	p__Cyanobacteria	c__Cyanobacteriia	o__Chloroplast	f__norank_o__Chloroplast	g__norank_f__norank_o__Chloroplast	s__unclassified_g__norank_f__norank_o__Chloroplast	OTU6770	0	0	0	0	0	0	0	0	0	0	0	1	0	0	0	0	0	0	0	0	1
d__Bacteria	k__norank_d__Bacteria	p__Acidobacteriota	c__Vicinamibacteria	o__Subgroup_17	f__norank_o__Subgroup_17	g__norank_f__norank_o__Subgroup_17	s__unclassified_g__norank_f__norank_o__Subgroup_17	OTU4520	9	7	16	4	8	10	8	19	1	17	1	2	1	3	0	0	0	0	0	0	106
d__Bacteria	k__norank_d__Bacteria	p__Patescibacteria	c__Dojkabacteria	o__norank_c__Dojkabacteria	f__norank_o__norank_c__Dojkabacteria	g__norank_f__norank_o__norank_c__Dojkabacteria	s__unclassified_g__norank_f__norank_o__norank_c__Dojkabacteria	OTU3883	0	1	0	0	0	0	3	0	0	0	0	0	0	0	0	0	0	0	0	0	4
d__Bacteria	k__norank_d__Bacteria	p__Zixibacteria	c__norank_p__Zixibacteria	o__norank_c__norank_p__Zixibacteria	f__norank_o__norank_c__norank_p__Zixibacteria	g__norank_f__norank_o__norank_c__norank_p__Zixibacteria	s__uncultured_bacterium_g__norank_f__norank_o__norank_c__norank_p__Zixibacteria	OTU3664	0	0	0	0	1	0	0	0	1	0	0	0	0	0	0	0	0	0	0	0	2
d__Bacteria	k__norank_d__Bacteria	p__LCP-89	c__norank_p__LCP-89	o__norank_c__norank_p__LCP-89	f__norank_o__norank_c__norank_p__LCP-89	g__norank_f__norank_o__norank_c__norank_p__LCP-89	s__uncultured_bacterium_g__norank_f__norank_o__norank_c__norank_p__LCP-89	OTU5941	0	0	0	0	0	0	2	0	1	2	0	0	0	0	0	0	0	0	0	0	5
d__Bacteria	k__norank_d__Bacteria	p__Actinobacteriota	c__Thermoleophilia	o__Solirubrobacterales	f__Solirubrobacteraceae	g__Conexibacter	s__metagenome_g__Conexibacter	OTU2711	2	0	1	1	0	2	0	1	0	1	0	0	0	0	0	0	0	0	0	0	8
d__Bacteria	k__norank_d__Bacteria	p__Proteobacteria	c__Gammaproteobacteria	o__Burkholderiales	f__Aquaspirillaceae	g__Aquaspirillum	s__Aquaspirillum_putridiconchylium	OTU6683	0	0	0	0	0	0	0	0	0	0	2	2	5	1	1	0	1	0	0	2	14
d__Bacteria	k__norank_d__Bacteria	p__Firmicutes	c__Clostridia	o__Lachnospirales	f__Lachnospiraceae	g__XBB1006	s__uncultured_bacterium_g__XBB1006	OTU7001	2	0	6	1	0	0	0	0	0	0	1	3	2	1	1	0	0	1	2	1	21
d__Bacteria	k__norank_d__Bacteria	p__Firmicutes	c__Bacilli	o__Lactobacillales	f__Lactobacillaceae	g__Lactobacillus	s__Lactobacillus_porci	OTU1262	2	1	4	0	0	0	0	0	0	0	1	0	0	0	0	0	0	0	0	0	8
d__Bacteria	k__norank_d__Bacteria	p__Chloroflexi	c__Anaerolineae	o__RBG-13-54-9	f__norank_o__RBG-13-54-9	g__norank_f__norank_o__RBG-13-54-9	s__unclassified_g__norank_f__norank_o__RBG-13-54-9	OTU3711	1	1	0	2	5	0	3	1	28	1	0	0	0	0	0	0	0	0	0	0	42
d__Bacteria	k__norank_d__Bacteria	p__Patescibacteria	c__Dojkabacteria	o__norank_c__Dojkabacteria	f__norank_o__norank_c__Dojkabacteria	g__norank_f__norank_o__norank_c__Dojkabacteria	s__uncultured_bacterium_g__norank_f__norank_o__norank_c__Dojkabacteria	OTU4591	0	0	0	0	0	0	1	1	0	0	0	0	0	0	0	0	0	0	0	0	2
d__Bacteria	k__norank_d__Bacteria	p__Verrucomicrobiota	c__Verrucomicrobiae	o__Pedosphaerales	f__Pedosphaeraceae	g__SH3-11	s__uncultured_Verrucomicrobia_bacterium_g__SH3-11	OTU7508	0	0	0	0	0	0	0	0	0	0	3	3	1	1	1	2	0	0	0	0	11
d__Bacteria	k__norank_d__Bacteria	p__Bacteroidota	c__Bacteroidia	o__Cytophagales	f__Spirosomaceae	g__Runella	s__Runella_slithyformis_DSM_19594	OTU770	5	1	5	3	1	0	0	0	0	0	0	0	0	0	0	0	0	0	0	0	15
d__Bacteria	k__norank_d__Bacteria	p__Latescibacterota	c__norank_p__Latescibacterota	o__norank_c__norank_p__Latescibacterota	f__norank_o__norank_c__norank_p__Latescibacterota	g__norank_f__norank_o__norank_c__norank_p__Latescibacterota	s__uncultured_soil_bacterium_g__norank_f__norank_o__norank_c__norank_p__Latescibacterota	OTU2565	0	0	0	0	0	4	0	0	0	0	0	0	0	0	0	0	0	0	0	0	4
d__Bacteria	k__norank_d__Bacteria	p__Proteobacteria	c__Gammaproteobacteria	o__Xanthomonadales	f__Xanthomonadaceae	g__Lysobacter	s__uncultured_bacterium_g__Lysobacter	OTU96	3	1	0	0	0	0	0	0	0	0	0	0	0	0	0	0	0	0	0	0	4
d__Bacteria	k__norank_d__Bacteria	p__Patescibacteria	c__ABY1	o__Candidatus_Magasanikbacteria	f__norank_o__Candidatus_Magasanikbacteria	g__norank_f__norank_o__Candidatus_Magasanikbacteria	s__unclassified_g__norank_f__norank_o__Candidatus_Magasanikbacteria	OTU6964	0	0	0	0	0	0	0	0	0	0	0	2	2	1	0	1	0	0	0	0	6
d__Bacteria	k__norank_d__Bacteria	p__Firmicutes	c__Bacilli	o__Erysipelotrichales	f__Erysipelatoclostridiaceae	g__unclassified_f__Erysipelatoclostridiaceae	s__unclassified_f__Erysipelatoclostridiaceae	OTU9052	0	0	1	0	0	0	0	0	0	0	0	0	0	0	2	0	0	0	0	1	4
d__Bacteria	k__norank_d__Bacteria	p__Proteobacteria	c__Gammaproteobacteria	o__Pseudomonadales	f__Moraxellaceae	g__Alkanindiges	s__unclassified_g__Alkanindiges	OTU9051	0	0	0	0	0	0	0	1	0	0	1	2	0	0	0	0	0	0	0	0	4
d__Bacteria	k__norank_d__Bacteria	p__Bacteroidota	c__Bacteroidia	o__Cytophagales	f__Cyclobacteriaceae	g__Algoriphagus	s__uncultured_Hongiella_sp.	OTU8603	0	0	0	0	0	0	0	0	0	0	22	15	27	22	31	12	17	35	82	46	309
d__Bacteria	k__norank_d__Bacteria	p__unclassified_k__norank_d__Bacteria	c__unclassified_k__norank_d__Bacteria	o__unclassified_k__norank_d__Bacteria	f__unclassified_k__norank_d__Bacteria	g__unclassified_k__norank_d__Bacteria	s__unclassified_k__norank_d__Bacteria	OTU6910	0	0	0	0	0	0	2	1	0	0	0	1	0	0	0	1	0	0	0	1	6
d__Bacteria	k__norank_d__Bacteria	p__Bacteroidota	c__Bacteroidia	o__Chitinophagales	f__Saprospiraceae	g__Haliscomenobacter	s__uncultured_bacterium_g__Haliscomenobacter	OTU1322	8	3	4	1	7	0	0	7	0	2	0	2	0	0	1	1	1	0	0	0	37
d__Bacteria	k__norank_d__Bacteria	p__Firmicutes	c__Clostridia	o__Peptostreptococcales-Tissierellales	f__Peptostreptococcaceae	g__Acetoanaerobium	s__uncultured_bacterium_g__Acetoanaerobium	OTU347	4	1	6	14	0	0	0	0	0	0	4	7	6	4	5	9	31	31	31	25	178
d__Bacteria	k__norank_d__Bacteria	p__Fibrobacterota	c__Chitinivibrionia	o__norank_c__Chitinivibrionia	f__norank_o__norank_c__Chitinivibrionia	g__norank_f__norank_o__norank_c__Chitinivibrionia	s__metagenome_g__norank_f__norank_o__norank_c__Chitinivibrionia	OTU5093	0	0	1	1	1	0	0	0	0	1	0	0	0	0	0	0	0	0	0	0	4
d__Bacteria	k__norank_d__Bacteria	p__Firmicutes	c__Negativicutes	o__Veillonellales-Selenomonadales	f__Veillonellaceae	g__Megasphaera	s__uncultured_bacterium_g__Megasphaera	OTU7121	0	0	0	0	0	0	0	0	0	0	0	1	1	1	0	0	1	1	3	0	8
d__Bacteria	k__norank_d__Bacteria	p__Bacteroidota	c__Bacteroidia	o__Bacteroidales	f__Prevotellaceae	g__Prevotella	s__unclassified_g__Prevotella	OTU8524	0	0	0	0	0	0	0	0	0	0	1	2	0	3	1	2	1	0	2	0	12
d__Bacteria	k__norank_d__Bacteria	p__Actinobacteriota	c__RBG-16-55-12	o__norank_c__RBG-16-55-12	f__norank_o__norank_c__RBG-16-55-12	g__norank_f__norank_o__norank_c__RBG-16-55-12	s__uncultured_actinomycete_g__norank	OTU5309	0	1	0	0	0	0	0	0	1	0	0	0	0	0	0	0	0	0	0	0	2
d__Bacteria	k__norank_d__Bacteria	p__Patescibacteria	c__ABY1	o__Candidatus_Kerfeldbacteria	f__norank_o__Candidatus_Kerfeldbacteria	g__norank_f__norank_o__Candidatus_Kerfeldbacteria	s__unclassified_g__norank_f__norank_o__Candidatus_Kerfeldbacteria	OTU3404	1	1	0	0	1	0	2	3	0	0	0	0	0	0	0	1	1	0	0	2	12
d__Bacteria	k__norank_d__Bacteria	p__Chloroflexi	c__Chloroflexia	o__Chloroflexales	f__Roseiflexaceae	g__norank_f__Roseiflexaceae	s__unclassified_g__norank_f__Roseiflexaceae	OTU5500	21	6	4	2	26	4	29	72	3	15	0	0	0	0	0	1	0	0	1	0	184
d__Bacteria	k__norank_d__Bacteria	p__Proteobacteria	c__Gammaproteobacteria	o__Competibacterales	f__Competibacteraceae	g__Candidatus_Competibacter	s__uncultured_bacterium_g__Candidatus_Competibacter	OTU5255	0	0	1	1	0	0	2	1	4	2	0	0	0	0	0	0	0	0	0	0	11
d__Bacteria	k__norank_d__Bacteria	p__Chloroflexi	c__Anaerolineae	o__SBR1031	f__norank_o__SBR1031	g__norank_f__norank_o__SBR1031	s__uncultured_sludge_bacterium_H5	OTU1157	4	0	11	2	0	0	2	6	0	3	0	0	0	0	0	0	0	0	0	0	28
d__Bacteria	k__norank_d__Bacteria	p__Proteobacteria	c__Gammaproteobacteria	o__Steroidobacterales	f__Steroidobacteraceae	g__norank_f__Steroidobacteraceae	s__uncultured_gamma_proteobacterium_g__norank_f__Steroidobacteraceae	OTU6066	2	2	0	1	1	6	2	1	1	1	0	0	0	0	0	0	0	0	0	0	17
d__Bacteria	k__norank_d__Bacteria	p__Patescibacteria	c__Saccharimonadia	o__Saccharimonadales	f__LWQ8	g__norank_f__LWQ8	s__uncultured_bacterium_g__norank_f__LWQ8	OTU7851	0	0	0	0	0	0	0	0	0	0	0	0	0	0	0	0	3	0	0	0	3
d__Bacteria	k__norank_d__Bacteria	p__Dependentiae	c__Babeliae	o__Babeliales	f__Vermiphilaceae	g__norank_f__Vermiphilaceae	s__uncultured_bacterium_g__norank_f__Vermiphilaceae	OTU8936	0	0	0	0	1	0	0	0	0	0	0	0	0	0	0	0	0	1	0	1	3
d__Bacteria	k__norank_d__Bacteria	p__Actinobacteriota	c__Acidimicrobiia	o__norank_c__Acidimicrobiia	f__norank_o__norank_c__Acidimicrobiia	g__norank_f__norank_o__norank_c__Acidimicrobiia	s__uncultured_Acidimicrobiia_bacterium_g__norank	OTU2342	8	2	1	0	1	10	1	2	1	1	0	0	0	0	0	0	1	0	0	0	28
d__Bacteria	k__norank_d__Bacteria	p__Fusobacteriota	c__Fusobacteriia	o__Fusobacteriales	f__Leptotrichiaceae	g__norank_f__Leptotrichiaceae	s__metagenome_g__norank_f__Leptotrichiaceae	OTU8969	0	0	0	0	0	0	0	0	0	0	0	2	9	2	6	4	1	2	4	12	42
d__Bacteria	k__norank_d__Bacteria	p__Chloroflexi	c__Anaerolineae	o__Ardenticatenales	f__norank_o__Ardenticatenales	g__norank_f__norank_o__Ardenticatenales	s__uncultured_prokaryote_g__norank_f__norank_o__Ardenticatenales	OTU916	0	0	5	1	0	0	0	0	0	0	0	0	0	1	0	0	0	0	0	0	7
d__Bacteria	k__norank_d__Bacteria	p__Firmicutes	c__Negativicutes	o__Veillonellales-Selenomonadales	f__Sporomusaceae	g__norank_f__Sporomusaceae	s__uncultured_bacterium_g__norank_f__Sporomusaceae	OTU3017	0	1	0	0	0	3	0	0	0	0	0	0	0	0	0	0	0	0	0	0	4
d__Bacteria	k__norank_d__Bacteria	p__Bdellovibrionota	c__Oligoflexia	o__0319-6G20	f__norank_o__0319-6G20	g__norank_f__norank_o__0319-6G20	s__unclassified_g__norank_f__norank_o__0319-6G20	OTU2369	0	0	0	0	0	1	0	0	0	0	0	0	0	0	0	0	0	0	0	0	1
d__Bacteria	k__norank_d__Bacteria	p__Proteobacteria	c__Alphaproteobacteria	o__Acetobacterales	f__Acetobacteraceae	g__Roseomonas	s__metagenome_g__Roseomonas	OTU3749	1	4	0	0	3	5	6	1	1	7	1	1	0	0	0	0	0	0	1	0	31
d__Bacteria	k__norank_d__Bacteria	p__Acidobacteriota	c__Subgroup_18	o__norank_c__Subgroup_18	f__norank_o__norank_c__Subgroup_18	g__norank_f__norank_o__norank_c__Subgroup_18	s__uncultured_bacterium_g__norank_f__norank_o__norank_c__Subgroup_18	OTU3112	1	0	0	2	0	8	2	0	1	0	0	0	0	0	0	0	0	0	0	0	14
d__Bacteria	k__norank_d__Bacteria	p__Chloroflexi	c__Anaerolineae	o__SBR1031	f__A4b	g__norank_f__A4b	s__uncultured_soil_bacterium_g__norank_f__A4b	OTU1168	36	20	19	2	11	10	13	12	0	13	0	0	0	0	0	1	0	0	0	0	137
d__Bacteria	k__norank_d__Bacteria	p__Patescibacteria	c__CPR2	o__norank_c__CPR2	f__norank_o__norank_c__CPR2	g__norank_f__norank_o__norank_c__CPR2	s__uncultured_bacterium_g__norank_f__norank_o__norank_c__CPR2	OTU1060	0	0	1	1	1	0	0	0	0	0	0	0	0	0	0	0	0	0	0	1	4
d__Bacteria	k__norank_d__Bacteria	p__Chloroflexi	c__Chloroflexia	o__unclassified_c__Chloroflexia	f__unclassified_c__Chloroflexia	g__unclassified_c__Chloroflexia	s__unclassified_c__Chloroflexia	OTU327	4	1	0	0	0	0	0	1	0	0	0	0	0	0	0	0	0	0	0	0	6
d__Bacteria	k__norank_d__Bacteria	p__Firmicutes	c__Clostridia	o__Clostridiales	f__Clostridiaceae	g__Clostridium_sensu_stricto_2	s__Clostridium_frigidicarnis	OTU996	5	7	3	4	3	2	4	8	3	3	2	1	0	0	0	0	0	0	0	0	45
d__Bacteria	k__norank_d__Bacteria	p__SAR324_cladeMarine_group_B	c__norank_p__SAR324_cladeMarine_group_B	o__norank_c__norank_p__SAR324_cladeMarine_group_B	f__norank_o__norank_c__norank_p__SAR324_cladeMarine_group_B	g__norank_f__norank_o__norank_c__norank_p__SAR324_cladeMarine_group_B	s__uncultured_soil_bacterium_g__norank_f__norank_o__norank_c__norank_p__SAR324_cladeMarine_group_B	OTU8860	0	0	0	0	0	0	0	0	1	0	0	0	0	0	0	0	0	0	0	1	2
d__Bacteria	k__norank_d__Bacteria	p__Latescibacterota	c__norank_p__Latescibacterota	o__norank_c__norank_p__Latescibacterota	f__norank_o__norank_c__norank_p__Latescibacterota	g__norank_f__norank_o__norank_c__norank_p__Latescibacterota	s__unclassified_g__norank_f__norank_o__norank_c__norank_p__Latescibacterota	OTU4857	1	1	1	1	7	1	8	8	14	7	0	0	0	0	0	0	0	0	0	0	49
d__Bacteria	k__norank_d__Bacteria	p__Acidobacteriota	c__Thermoanaerobaculia	o__Thermoanaerobaculales	f__Thermoanaerobaculaceae	g__Subgroup_10	s__uncultured_bacterium_g__Subgroup_10	OTU6075	1	0	0	0	1	0	0	0	0	2	0	0	0	0	0	0	0	0	0	0	4
d__Bacteria	k__norank_d__Bacteria	p__Gemmatimonadota	c__BD2-11_terrestrial_group	o__norank_c__BD2-11_terrestrial_group	f__norank_o__norank_c__BD2-11_terrestrial_group	g__norank_f__norank_o__norank_c__BD2-11_terrestrial_group	s__metagenome_g__norank_f__norank_o__norank_c__BD2-11_terrestrial_group	OTU1850	0	0	0	0	1	0	0	1	0	0	0	0	0	0	0	0	0	0	0	0	2
d__Bacteria	k__norank_d__Bacteria	p__Cyanobacteria	c__Vampirivibrionia	o__Obscuribacterales	f__Obscuribacteraceae	g__norank_f__Obscuribacteraceae	s__uncultured_bacterium_g__norank_f__Obscuribacteraceae	OTU163	4	0	0	0	0	0	0	0	0	0	0	0	1	0	0	0	0	0	0	0	5
d__Bacteria	k__norank_d__Bacteria	p__Verrucomicrobiota	c__Verrucomicrobiae	o__norank_c__Verrucomicrobiae	f__norank_o__norank_c__Verrucomicrobiae	g__norank_f__norank_o__norank	s__unclassified_g__norank_f__norank_o__norank	OTU7464	0	0	0	0	0	0	0	0	0	0	0	0	1	0	0	0	0	1	0	0	2
d__Bacteria	k__norank_d__Bacteria	p__Chloroflexi	c__Chloroflexia	o__Chloroflexales	f__Herpetosiphonaceae	g__Herpetosiphon	s__uncultured_bacterium_g__Herpetosiphon	OTU1131	8	2	5	1	0	0	2	1	0	0	0	0	0	0	0	0	0	0	0	0	19
d__Bacteria	k__norank_d__Bacteria	p__Proteobacteria	c__Alphaproteobacteria	o__Acetobacterales	f__Acetobacteraceae	g__Roseococcus	s__uncultured_bacterium_g__Roseococcus	OTU7639	0	0	0	0	0	0	0	0	0	0	2	1	1	1	0	0	2	0	1	2	10
d__Bacteria	k__norank_d__Bacteria	p__Chloroflexi	c__Anaerolineae	o__Anaerolineales	f__Anaerolineaceae	g__Pelolinea	s__uncultured_bacterium_g__Pelolinea	OTU1219	0	6	3	1	6	0	2	0	3	0	0	0	1	0	0	0	0	0	0	0	22
d__Bacteria	k__norank_d__Bacteria	p__Chloroflexi	c__Anaerolineae	o__Anaerolineales	f__Anaerolineaceae	g__Anaerolinea	s__unclassified_g__Anaerolinea	OTU3403	0	1	0	1	2	0	1	0	0	0	0	0	0	0	0	0	0	0	0	0	5
d__Bacteria	k__norank_d__Bacteria	p__Proteobacteria	c__Gammaproteobacteria	o__Pseudomonadales	f__Pseudomonadaceae	g__Pseudomonas	s__unclassified_g__Pseudomonas	OTU7786	0	1	0	0	0	0	0	0	0	0	7	34	7	13	20	31	38	10	27	20	208
d__Bacteria	k__norank_d__Bacteria	p__Proteobacteria	c__Gammaproteobacteria	o__Pseudomonadales	f__Pseudomonadaceae	g__Pseudomonas	s__Pseudomonas_resinovorans_NBRC_106553	OTU8746	3	0	2	0	2	0	2	1	0	0	4	13	12	10	11	113	118	302	271	322	1186
d__Bacteria	k__norank_d__Bacteria	p__Proteobacteria	c__Gammaproteobacteria	o__SZB30	f__norank_o__SZB30	g__norank_f__norank_o__SZB30	s__unclassified_g__norank_f__norank_o__SZB30	OTU6525	25	20	19	45	26	9	57	39	284	72	3	1	0	1	1	1	1	1	0	0	605
d__Bacteria	k__norank_d__Bacteria	p__Fusobacteriota	c__Fusobacteriia	o__Fusobacteriales	f__Leptotrichiaceae	g__Leptotrichia	s__metagenome_g__Leptotrichia	OTU7243	0	0	0	0	0	0	0	0	0	0	0	2	1	1	0	0	0	0	0	0	4
d__Bacteria	k__norank_d__Bacteria	p__Proteobacteria	c__Gammaproteobacteria	o__Burkholderiales	f__Burkholderiaceae	g__Cupriavidus	s__unclassified_g__Cupriavidus	OTU2528	0	0	21	2	0	10	8	1	0	1	0	0	2	0	0	0	0	3	5	1	54
d__Bacteria	k__norank_d__Bacteria	p__Chloroflexi	c__KD4-96	o__norank_c__KD4-96	f__norank_o__norank_c__KD4-96	g__norank_f__norank_o__norank_c__KD4-96	s__uncultured_bacterium_g__norank_f__norank_o__norank_c__KD4-96	OTU2842	2	1	1	0	2	17	2	2	0	2	0	0	0	0	0	0	0	0	0	0	29
d__Bacteria	k__norank_d__Bacteria	p__Synergistota	c__Synergistia	o__Synergistales	f__Synergistaceae	g__unclassified_f__Synergistaceae	s__unclassified_f__Synergistaceae	OTU1656	0	1	3	1	0	0	1	0	8	1	0	0	0	0	0	0	0	0	0	0	15
d__Bacteria	k__norank_d__Bacteria	p__Zixibacteria	c__norank_p__Zixibacteria	o__norank_c__norank_p__Zixibacteria	f__norank_o__norank_c__norank_p__Zixibacteria	g__norank_f__norank_o__norank_c__norank_p__Zixibacteria	s__uncultured_bacterium_g__norank_f__norank_o__norank_c__norank_p__Zixibacteria	OTU5031	0	0	0	0	0	0	1	0	3	0	0	0	0	0	0	0	0	0	0	0	4
d__Bacteria	k__norank_d__Bacteria	p__Zixibacteria	c__norank_p__Zixibacteria	o__norank_c__norank_p__Zixibacteria	f__norank_o__norank_c__norank_p__Zixibacteria	g__norank_f__norank_o__norank_c__norank_p__Zixibacteria	s__unclassified_g__norank_f__norank_o__norank_c__norank_p__Zixibacteria	OTU5142	2	1	1	0	4	0	1	3	10	3	0	0	0	0	0	0	0	0	0	0	25
d__Bacteria	k__norank_d__Bacteria	p__Patescibacteria	c__Saccharimonadia	o__Saccharimonadales	f__norank_o__Saccharimonadales	g__norank_f__norank_o__Saccharimonadales	s__uncultured_bacterium_g__norank_f__norank_o__Saccharimonadales	OTU1986	0	0	0	0	3	0	0	0	0	0	0	0	0	0	0	0	0	0	0	0	3
d__Bacteria	k__norank_d__Bacteria	p__Bacteroidota	c__Bacteroidia	o__Bacteroidales	f__Prolixibacteraceae	g__norank_f__Prolixibacteraceae	s__unclassified_g__norank_f__Prolixibacteraceae	OTU6536	0	1	0	0	2	0	2	0	0	6	0	0	0	0	0	0	0	0	0	0	11
d__Bacteria	k__norank_d__Bacteria	p__Methylomirabilota	c__Methylomirabilia	o__Methylomirabilales	f__Methylomirabilaceae	g__Candidatus_Methylomirabilis	s__uncultured_Firmicutes_bacterium_g__Candidatus_Methylomirabilis	OTU3167	0	0	0	0	0	12	1	0	0	0	0	0	0	0	0	0	0	0	0	0	13
d__Bacteria	k__norank_d__Bacteria	p__Bacteroidota	c__Bacteroidia	o__Chitinophagales	f__Chitinophagaceae	g__Edaphobaculum	s__uncultured_bacterium_g__Edaphobaculum	OTU7950	1	0	0	0	0	0	0	0	0	0	0	0	0	0	0	1	0	0	0	1	3
d__Bacteria	k__norank_d__Bacteria	p__Acidobacteriota	c__Blastocatellia	o__DS-100	f__norank_o__DS-100	g__norank_f__norank_o__DS-100	s__uncultured_bacterium_g__norank_f__norank_o__DS-100	OTU6299	4	0	1	0	1	1	2	1	0	0	0	4	0	2	0	0	0	0	0	0	16
d__Bacteria	k__norank_d__Bacteria	p__Firmicutes	c__Clostridia	o__Christensenellales	f__Christensenellaceae	g__norank_f__Christensenellaceae	s__uncultured_bacterium_g__norank_f__Christensenellaceae	OTU3188	1	0	0	2	0	10	0	2	2	1	0	0	0	0	0	0	0	0	0	0	18
d__Bacteria	k__norank_d__Bacteria	p__Desulfobacterota	c__Syntrophorhabdia	o__Syntrophorhabdales	f__Syntrophorhabdaceae	g__Syntrophorhabdus	s__uncultured_bacterium_g__Syntrophorhabdus	OTU5913	1	5	5	19	5	14	23	5	32	2	1	0	0	0	1	0	0	0	0	1	114
d__Bacteria	k__norank_d__Bacteria	p__Firmicutes	c__Clostridia	o__Clostridiales	f__Clostridiaceae	g__Clostridium_sensu_stricto_5	s__uncultured_bacterium_g__Clostridium_sensu_stricto_5	OTU8813	1	0	4	3	0	1	0	12	5	1	0	1	0	0	0	0	0	0	0	1	29
d__Bacteria	k__norank_d__Bacteria	p__Bdellovibrionota	c__Oligoflexia	o__0319-6G20	f__norank_o__0319-6G20	g__norank_f__norank_o__0319-6G20	s__uncultured_bacterium_g__norank_f__norank_o__0319-6G20	OTU3611	0	0	0	0	0	1	1	0	0	0	0	0	0	0	0	0	0	0	0	0	2
d__Bacteria	k__norank_d__Bacteria	p__Firmicutes	c__Bacilli	o__Staphylococcales	f__Staphylococcaceae	g__Staphylococcus	s__Staphylococcus_sciuri	OTU3998	0	0	0	0	0	0	1	0	0	0	0	0	0	0	0	0	0	0	0	1	2
d__Bacteria	k__norank_d__Bacteria	p__Chloroflexi	c__Anaerolineae	o__SBR1031	f__norank_o__SBR1031	g__norank_f__norank_o__SBR1031	s__uncultured_bacterium_g__norank_f__norank_o__SBR1031	OTU2616	6	12	2	2	0	5	2	0	0	1	0	0	0	0	0	0	0	0	0	0	30
d__Bacteria	k__norank_d__Bacteria	p__Acidobacteriota	c__Thermoanaerobaculia	o__Thermoanaerobaculales	f__Thermoanaerobaculaceae	g__Subgroup_10	s__unclassified_g__Subgroup_10	OTU3574	0	0	0	0	0	0	2	0	0	1	0	0	0	0	0	0	0	0	0	0	3
d__Bacteria	k__norank_d__Bacteria	p__Bacteroidota	c__Bacteroidia	o__Flavobacteriales	f__Crocinitomicaceae	g__Fluviicola	s__unclassified_g__Fluviicola	OTU6694	0	0	0	0	0	0	0	0	0	0	7	7	6	1	3	1	2	1	0	1	29
d__Bacteria	k__norank_d__Bacteria	p__Bacteroidota	c__Bacteroidia	o__Chitinophagales	f__Chitinophagaceae	g__Dinghuibacter	s__uncultured_bacterium_g__Dinghuibacter	OTU5095	7	4	3	8	2	3	6	10	6	5	0	0	0	0	0	0	0	0	0	0	54
d__Bacteria	k__norank_d__Bacteria	p__Chloroflexi	c__Anaerolineae	o__Anaerolineales	f__Anaerolineaceae	g__norank_f__Anaerolineaceae	s__unclassified_g__norank_f__Anaerolineaceae	OTU1129	0	2	4	0	2	0	0	0	0	0	0	0	0	0	0	0	0	0	0	0	8
d__Bacteria	k__norank_d__Bacteria	p__Firmicutes	c__Bacilli	o__Lactobacillales	f__Lactobacillaceae	g__Lactobacillus	s__Lactobacillus_fermentum	OTU9050	0	1	0	0	0	0	0	0	0	0	1	0	0	0	0	0	0	0	0	2	4
d__Bacteria	k__norank_d__Bacteria	p__Acidobacteriota	c__Blastocatellia	o__11-24	f__norank_o__11-24	g__norank_f__norank_o__11-24	s__uncultured_bacterium_g__norank_f__norank_o__11-24	OTU4122	1	0	1	0	1	1	2	0	1	0	0	0	0	0	0	0	0	0	0	0	7
d__Bacteria	k__norank_d__Bacteria	p__Zixibacteria	c__norank_p__Zixibacteria	o__norank_c__norank_p__Zixibacteria	f__norank_o__norank_c__norank_p__Zixibacteria	g__norank_f__norank_o__norank_c__norank_p__Zixibacteria	s__uncultured_bacterium_g__norank_f__norank_o__norank_c__norank_p__Zixibacteria	OTU4184	1	0	0	0	1	0	1	0	0	0	0	0	0	0	0	1	0	0	0	0	4
d__Bacteria	k__norank_d__Bacteria	p__Bacteroidota	c__Bacteroidia	o__Cytophagales	f__Cytophagaceae	g__Sporocytophaga	s__uncultured_bacterium_g__Sporocytophaga	OTU3130	0	0	0	0	0	2	0	0	1	0	0	0	0	0	0	0	0	0	0	0	3
d__Bacteria	k__norank_d__Bacteria	p__Dependentiae	c__Babeliae	o__Babeliales	f__unclassified_o__Babeliales	g__unclassified_o__Babeliales	s__unclassified_o__Babeliales	OTU93	2	0	0	0	0	0	0	0	0	0	0	0	0	0	0	0	0	0	0	0	2
d__Bacteria	k__norank_d__Bacteria	p__Bacteroidota	c__Bacteroidia	o__Sphingobacteriales	f__Sphingobacteriaceae	g__Pedobacter	s__uncultured_Sphingobacteriaceae_bacterium_g__Pedobacter	OTU7228	2	2	2	4	5	0	1	0	0	0	6	3	1	4	5	2	1	0	2	0	40
d__Bacteria	k__norank_d__Bacteria	p__Armatimonadota	c__Fimbriimonadia	o__Fimbriimonadales	f__Fimbriimonadaceae	g__norank_f__Fimbriimonadaceae	s__uncultured_bacterium_g__norank_f__Fimbriimonadaceae	OTU2057	0	0	0	1	3	0	0	1	0	0	0	0	0	0	0	0	0	0	0	0	5
d__Bacteria	k__norank_d__Bacteria	p__Firmicutes	c__Clostridia	o__Caldicoprobacterales	f__Caldicoprobacteraceae	g__Caldicoprobacter	s__anaerobic_digester_metagenome_g__Caldicoprobacter	OTU4457	0	0	0	0	0	0	0	0	1	0	0	0	0	0	0	0	0	0	0	0	1
d__Bacteria	k__norank_d__Bacteria	p__Actinobacteriota	c__Actinobacteria	o__Propionibacteriales	f__Nocardioidaceae	g__Nocardioides	s__uncultured_bacterium_g__Nocardioides	OTU1858	0	0	0	0	2	0	0	0	0	0	0	0	0	0	0	0	0	0	0	0	2
d__Bacteria	k__norank_d__Bacteria	p__Bacteroidota	c__Bacteroidia	o__Sphingobacteriales	f__env.OPS_17	g__norank_f__env.OPS_17	s__metagenome_g__norank_f__env.OPS_17	OTU3	1	0	1	0	0	0	0	0	0	0	2	0	0	0	0	0	0	0	1	0	5
d__Bacteria	k__norank_d__Bacteria	p__Chloroflexi	c__Anaerolineae	o__SBR1031	f__A4b	g__norank_f__A4b	s__uncultured_bacterium_g__norank_f__A4b	OTU960	0	0	5	0	0	0	0	1	0	0	0	0	0	0	0	0	0	0	0	0	6
d__Bacteria	k__norank_d__Bacteria	p__Desulfobacterota	c__norank_p__Desulfobacterota	o__norank_c__norank_p__Desulfobacterota	f__norank_o__norank_c__norank_p__Desulfobacterota	g__norank_f__norank_o__norank_c__norank_p__Desulfobacterota	s__unclassified_g__norank_f__norank_o__norank_c__norank_p__Desulfobacterota	OTU168	9	0	0	0	4	4	0	0	3	0	0	0	0	0	0	0	0	0	0	0	20
d__Bacteria	k__norank_d__Bacteria	p__Spirochaetota	c__Spirochaetia	o__Spirochaetales	f__Spirochaetaceae	g__norank_f__Spirochaetaceae	s__uncultured_prokaryote_g__norank_f__Spirochaetaceae	OTU3822	0	3	2	3	0	0	0	0	0	1	0	0	0	0	0	0	0	0	0	0	9
d__Bacteria	k__norank_d__Bacteria	p__Planctomycetota	c__OM190	o__norank_c__OM190	f__norank_o__norank_c__OM190	g__norank_f__norank_o__norank_c__OM190	s__uncultured_soil_bacterium_g__norank_f__norank_o__norank_c__OM190	OTU6215	0	1	0	1	0	0	0	0	0	0	0	0	0	0	0	0	0	0	0	0	2
d__Bacteria	k__norank_d__Bacteria	p__Bdellovibrionota	c__Oligoflexia	o__0319-6G20	f__norank_o__0319-6G20	g__norank_f__norank_o__0319-6G20	s__uncultured_Syntrophobacteraceae_bacterium_g__norank	OTU8107	0	0	0	0	0	0	0	0	0	0	0	0	0	0	0	2	1	2	4	1	10
d__Bacteria	k__norank_d__Bacteria	p__Verrucomicrobiota	c__Verrucomicrobiae	o__Pedosphaerales	f__Pedosphaeraceae	g__unclassified_f__Pedosphaeraceae	s__unclassified_f__Pedosphaeraceae	OTU2884	0	0	0	0	0	1	0	0	0	0	0	0	0	0	0	0	0	0	0	0	1
d__Bacteria	k__norank_d__Bacteria	p__Actinobacteriota	c__Acidimicrobiia	o__IMCC26256	f__norank_o__IMCC26256	g__norank_f__norank_o__IMCC26256	s__unclassified_g__norank_f__norank_o__IMCC26256	OTU1143	17	1	21	23	10	4	4	8	9	3	0	0	0	0	0	0	1	0	0	0	101
d__Bacteria	k__norank_d__Bacteria	p__Proteobacteria	c__Gammaproteobacteria	o__Burkholderiales	f__Burkholderiaceae	g__Polynucleobacter	s__uncultured_bacterium_g__Polynucleobacter	OTU7201	0	0	0	0	1	0	0	0	0	0	451	375	311	289	387	83	75	63	77	71	2183
d__Bacteria	k__norank_d__Bacteria	p__Planctomycetota	c__OM190	o__norank_c__OM190	f__norank_o__norank_c__OM190	g__norank_f__norank_o__norank_c__OM190	s__unclassified_g__norank_f__norank_o__norank_c__OM190	OTU1917	1	0	1	0	1	1	0	1	0	0	0	0	0	0	0	0	0	0	0	0	5
d__Bacteria	k__norank_d__Bacteria	p__Cyanobacteria	c__Cyanobacteriia	o__Cyanobacteriales	f__Phormidiaceae	g__Planktothrix_NIVA-CYA_15	s__unclassified_g__Planktothrix_NIVA-CYA_15	OTU5834	0	0	0	0	0	0	0	27	1	59	0	0	0	0	0	15	6	0	0	0	108
d__Bacteria	k__norank_d__Bacteria	p__Planctomycetota	c__Planctomycetes	o__Gemmatales	f__Gemmataceae	g__norank_f__Gemmataceae	s__uncultured_bacterium_g__norank_f__Gemmataceae	OTU396	4	0	0	0	1	0	0	0	0	1	0	0	0	0	0	0	0	0	0	0	6
d__Bacteria	k__norank_d__Bacteria	p__Cyanobacteria	c__Cyanobacteriia	o__Oxyphotobacteria_Incertae_Sedis	f__unclassified_o__Oxyphotobacteria_Incertae_Sedis	g__Pseudanabaena_NgrPSln22	s__Pseudanabaenaceae_cyanobacterium_CENA319	OTU4022	1	0	0	0	1	0	1	3	0	5	0	0	0	0	0	0	1	0	2	0	14
d__Bacteria	k__norank_d__Bacteria	p__Patescibacteria	c__Gracilibacteria	o__unclassified_c__Gracilibacteria	f__unclassified_c__Gracilibacteria	g__unclassified_c__Gracilibacteria	s__unclassified_c__Gracilibacteria	OTU5784	0	3	0	0	0	0	0	0	0	1	0	0	0	0	0	0	0	0	0	0	4
d__Bacteria	k__norank_d__Bacteria	p__Chloroflexi	c__Anaerolineae	o__SBR1031	f__A4b	g__norank_f__A4b	s__uncultured_bacterium_g__norank_f__A4b	OTU1089	6	0	1	0	0	0	0	0	0	0	0	0	0	0	0	0	0	0	0	0	7
d__Bacteria	k__norank_d__Bacteria	p__unclassified_k__norank_d__Bacteria	c__unclassified_k__norank_d__Bacteria	o__unclassified_k__norank_d__Bacteria	f__unclassified_k__norank_d__Bacteria	g__unclassified_k__norank_d__Bacteria	s__unclassified_k__norank_d__Bacteria	OTU8257	0	0	1	0	1	0	0	0	0	0	0	0	0	0	0	0	0	1	0	0	3
d__Bacteria	k__norank_d__Bacteria	p__unclassified_k__norank_d__Bacteria	c__unclassified_k__norank_d__Bacteria	o__unclassified_k__norank_d__Bacteria	f__unclassified_k__norank_d__Bacteria	g__unclassified_k__norank_d__Bacteria	s__unclassified_k__norank_d__Bacteria	OTU8255	0	0	0	0	1	0	1	0	0	1	1	0	0	0	0	0	0	0	0	0	4
d__Bacteria	k__norank_d__Bacteria	p__unclassified_k__norank_d__Bacteria	c__unclassified_k__norank_d__Bacteria	o__unclassified_k__norank_d__Bacteria	f__unclassified_k__norank_d__Bacteria	g__unclassified_k__norank_d__Bacteria	s__unclassified_k__norank_d__Bacteria	OTU8250	0	0	0	0	0	0	0	0	0	0	0	0	0	0	0	0	0	1	0	0	1
d__Bacteria	k__norank_d__Bacteria	p__Bacteroidota	c__Bacteroidia	o__Cytophagales	f__Hymenobacteraceae	g__Hymenobacter	s__unclassified_g__Hymenobacter	OTU1814	0	0	0	1	3	0	0	0	0	0	0	0	0	0	0	0	0	0	0	0	4
d__Bacteria	k__norank_d__Bacteria	p__Spirochaetota	c__Spirochaetia	o__Spirochaetales	f__Spirochaetaceae	g__Spirochaeta	s__uncultured_bacterium_g__Spirochaeta	OTU5730	0	0	0	0	0	1	0	0	0	1	0	0	0	0	0	0	0	0	0	0	2
d__Bacteria	k__norank_d__Bacteria	p__Patescibacteria	c__Gracilibacteria	o__Absconditabacteriales_SR1	f__norank_o__Absconditabacteriales_SR1	g__norank_f__norank_o__Absconditabacteriales_SR1	s__uncultured_candidate_division_SR1_bacterium	OTU4959	2	3	1	0	0	0	0	1	0	3	0	0	0	2	0	0	0	0	0	1	13
d__Bacteria	k__norank_d__Bacteria	p__Firmicutes	c__Bacilli	o__Lactobacillales	f__Lactobacillaceae	g__Lactobacillus	s__Lactobacillus_johnsonii	OTU6576	0	0	0	0	4	0	0	0	0	0	1	0	2	1	0	1	0	0	0	0	9
d__Bacteria	k__norank_d__Bacteria	p__Acidobacteriota	c__Thermoanaerobaculia	o__Thermoanaerobaculales	f__Thermoanaerobaculaceae	g__Subgroup_23	s__unclassified_g__Subgroup_23	OTU1591	0	0	0	1	0	0	2	1	1	0	0	0	0	0	0	0	0	0	0	0	5
d__Bacteria	k__norank_d__Bacteria	p__Chloroflexi	c__Anaerolineae	o__SBR1031	f__norank_o__SBR1031	g__norank_f__norank_o__SBR1031	s__uncultured_Anaerolineaceae_bacterium_g__norank_f__norank_o__SBR1031	OTU190	3	0	0	0	0	0	0	0	0	0	0	0	0	0	0	0	0	0	0	0	3
d__Bacteria	k__norank_d__Bacteria	p__Patescibacteria	c__Parcubacteria	o__Candidatus_Kaiserbacteria	f__norank_o__Candidatus_Kaiserbacteria	g__norank_f__norank_o__Candidatus_Kaiserbacteria	s__unclassified_g__norank_f__norank_o__Candidatus_Kaiserbacteria	OTU8893	0	0	0	0	0	0	0	0	0	0	0	0	0	0	0	0	0	0	0	2	2
d__Bacteria	k__norank_d__Bacteria	p__Bacteroidota	c__Bacteroidia	o__Bacteroidales	f__Prolixibacteraceae	g__Roseimarinus	s__uncultured_bacterium_g__Roseimarinus	OTU1458	0	6	0	1	0	0	1	0	0	0	0	0	0	0	0	0	0	0	0	0	8
d__Bacteria	k__norank_d__Bacteria	p__Actinobacteriota	c__Actinobacteria	o__Corynebacteriales	f__Corynebacteriaceae	g__Corynebacterium	s__Corynebacterium_xerosis	OTU701	2	2	7	3	4	0	3	0	3	3	0	0	2	2	1	0	0	0	0	0	32
d__Bacteria	k__norank_d__Bacteria	p__Patescibacteria	c__Parcubacteria	o__Candidatus_Kaiserbacteria	f__norank_o__Candidatus_Kaiserbacteria	g__norank_f__norank_o__Candidatus_Kaiserbacteria	s__unclassified_g__norank_f__norank_o__Candidatus_Kaiserbacteria	OTU8898	0	0	0	0	0	0	0	0	0	0	0	0	1	0	0	0	0	1	1	1	4
d__Bacteria	k__norank_d__Bacteria	p__Chloroflexi	c__Anaerolineae	o__Anaerolineales	f__Anaerolineaceae	g__Anaerolinea	s__uncultured_bacterium_g__Anaerolinea	OTU6439	4	12	12	9	33	2	9	4	8	7	1	1	0	0	0	0	0	0	0	0	102
d__Bacteria	k__norank_d__Bacteria	p__Myxococcota	c__Polyangia	o__Polyangiales	f__Sandaracinaceae	g__norank_f__Sandaracinaceae	s__metagenome_g__norank_f__Sandaracinaceae	OTU4765	2	5	1	1	0	7	1	0	0	0	0	0	0	0	0	0	0	0	0	0	17
d__Bacteria	k__norank_d__Bacteria	p__Bacteroidota	c__Bacteroidia	o__Bacteroidales	f__Bacteroidetes_BD2-2	g__norank_f__Bacteroidetes_BD2-2	s__uncultured_bacterium_g__norank_f__Bacteroidetes_BD2-2	OTU716	0	4	3	0	1	0	0	0	0	0	1	0	0	1	0	0	0	0	0	0	10
d__Bacteria	k__norank_d__Bacteria	p__Proteobacteria	c__Gammaproteobacteria	o__Xanthomonadales	f__Xanthomonadaceae	g__Lysobacter	s__unclassified_g__Lysobacter	OTU6434	6	1	23	2	8	0	3	10	0	1	1	1	1	0	1	0	0	0	3	6	67
d__Bacteria	k__norank_d__Bacteria	p__Patescibacteria	c__Parcubacteria	o__Candidatus_Moranbacteria	f__norank_o__Candidatus_Moranbacteria	g__norank_f__norank_o__Candidatus_Moranbacteria	s__unclassified_g__norank_f__norank_o__Candidatus_Moranbacteria	OTU1546	0	6	0	4	0	0	0	0	0	0	0	1	0	0	1	1	0	0	0	0	13
d__Bacteria	k__norank_d__Bacteria	p__Cyanobacteria	c__Cyanobacteriia	o__Chloroplast	f__norank_o__Chloroplast	g__norank_f__norank_o__Chloroplast	s__unclassified_g__norank_f__norank_o__Chloroplast	OTU7691	0	0	0	0	0	0	0	0	0	0	8	5	3	6	2	11	19	3	0	0	57
d__Bacteria	k__norank_d__Bacteria	p__Cyanobacteria	c__Cyanobacteriia	o__Chloroplast	f__norank_o__Chloroplast	g__norank_f__norank_o__Chloroplast	s__unclassified_g__norank_f__norank_o__Chloroplast	OTU7693	0	0	0	0	0	0	0	0	0	0	0	0	0	0	0	0	2	0	0	0	2
d__Bacteria	k__norank_d__Bacteria	p__Chloroflexi	c__JG30-KF-CM66	o__norank_c__JG30-KF-CM66	f__norank_o__norank_c__JG30-KF-CM66	g__norank_f__norank_o__norank_c__JG30-KF-CM66	s__uncultured_bacterium_g__norank_f__norank_o__norank_c__JG30-KF-CM66	OTU5442	0	0	0	0	0	4	1	1	10	0	0	0	0	0	0	0	0	0	0	0	16
d__Bacteria	k__norank_d__Bacteria	p__Desulfobacterota	c__Desulfovibrionia	o__Desulfovibrionales	f__Desulfovibrionaceae	g__Desulfovibrio	s__unclassified_g__Desulfovibrio	OTU8136	0	0	1	1	0	0	0	0	0	1	1	0	1	1	0	1	0	2	2	1	12
d__Bacteria	k__norank_d__Bacteria	p__Proteobacteria	c__Gammaproteobacteria	o__Diplorickettsiales	f__Diplorickettsiaceae	g__Aquicella	s__unclassified_g__Aquicella	OTU5801	0	0	0	0	0	0	0	1	0	1	0	0	0	0	0	0	0	0	0	0	2
d__Bacteria	k__norank_d__Bacteria	p__Cyanobacteria	c__Vampirivibrionia	o__Obscuribacterales	f__Obscuribacteraceae	g__norank_f__Obscuribacteraceae	s__uncultured_bacterium_g__norank_f__Obscuribacteraceae	OTU8882	0	0	0	0	0	0	0	0	0	0	0	0	0	0	0	0	0	1	0	5	6
d__Bacteria	k__norank_d__Bacteria	p__Proteobacteria	c__Gammaproteobacteria	o__Burkholderiales	f__Chitinimonadaceae	g__Chitinivorax	s__uncultured_bacterium_g__Chitinivorax	OTU6092	0	0	1	1	0	0	0	1	0	0	0	0	1	0	2	1	1	1	1	4	14
d__Bacteria	k__norank_d__Bacteria	p__Chloroflexi	c__Anaerolineae	o__SBR1031	f__A4b	g__norank_f__A4b	s__uncultured_bacterium_g__norank_f__A4b	OTU1501	7	15	1	6	2	6	22	3	5	25	0	0	0	0	0	1	0	0	0	1	94
d__Bacteria	k__norank_d__Bacteria	p__Acidobacteriota	c__Aminicenantia	o__Aminicenantales	f__norank_o__Aminicenantales	g__norank_f__norank_o__Aminicenantales	s__uncultured_bacterium_g__norank_f__norank_o__Aminicenantales	OTU3976	0	0	0	0	1	0	3	0	0	0	0	0	0	0	0	0	0	0	0	0	4
d__Bacteria	k__norank_d__Bacteria	p__Cyanobacteria	c__Cyanobacteriia	o__Cyanobacteriales	f__Microcystaceae	g__unclassified_f__Microcystaceae	s__unclassified_f__Microcystaceae	OTU6990	0	0	0	0	0	0	0	0	0	0	2	1	1	0	0	3	5	0	0	1	13
d__Bacteria	k__norank_d__Bacteria	p__Chloroflexi	c__Anaerolineae	o__SBR1031	f__norank_o__SBR1031	g__norank_f__norank_o__SBR1031	s__unclassified_g__norank_f__norank_o__SBR1031	OTU1099	0	0	1	0	0	1	0	0	0	0	0	0	0	0	0	0	0	0	0	0	2
d__Bacteria	k__norank_d__Bacteria	p__Bdellovibrionota	c__Bdellovibrionia	o__Bdellovibrionales	f__Bdellovibrionaceae	g__Bdellovibrio	s__Bdellovibrio_sp._oral_clone_CA006	OTU8596	0	0	0	0	0	0	0	0	0	0	0	0	0	0	0	0	0	0	1	0	1
d__Bacteria	k__norank_d__Bacteria	p__Bacteroidota	c__Bacteroidia	o__Chitinophagales	f__norank_o__Chitinophagales	g__norank_f__norank_o__Chitinophagales	s__unclassified_g__norank_f__norank_o__Chitinophagales	OTU8702	0	3	3	6	3	1	2	2	0	2	0	1	0	0	1	0	0	0	0	3	27
d__Bacteria	k__norank_d__Bacteria	p__Acidobacteriota	c__Aminicenantia	o__Aminicenantales	f__norank_o__Aminicenantales	g__norank_f__norank_o__Aminicenantales	s__uncultured_soil_bacterium_g__norank_f__norank_o__Aminicenantales	OTU3951	0	2	4	1	2	5	12	14	137	14	1	0	0	0	0	0	0	0	0	0	192
d__Bacteria	k__norank_d__Bacteria	p__Proteobacteria	c__Alphaproteobacteria	o__norank_c__Alphaproteobacteria	f__norank_o__norank_c__Alphaproteobacteria	g__norank_f__norank_o__norank_c__Alphaproteobacteria	s__uncultured_Oceanibaculum_sp._g__norank_f__norank	OTU6978	0	0	0	0	0	0	0	0	0	0	0	3	1	0	1	1	2	3	2	5	18
d__Bacteria	k__norank_d__Bacteria	p__Proteobacteria	c__Alphaproteobacteria	o__Rhodospirillales	f__norank_o__Rhodospirillales	g__norank_f__norank_o__Rhodospirillales	s__unclassified_g__norank_f__norank_o__Rhodospirillales	OTU8869	0	0	0	0	0	0	0	0	0	0	0	0	0	0	0	0	0	1	0	0	1
d__Bacteria	k__norank_d__Bacteria	p__Actinobacteriota	c__Actinobacteria	o__Actinomycetales	f__Actinomycetaceae	g__Actinomyces	s__unclassified_g__Actinomyces	OTU6815	2	0	2	0	0	0	0	0	1	0	0	3	0	0	0	0	0	0	0	0	8
d__Bacteria	k__norank_d__Bacteria	p__Acidobacteriota	c__Acidobacteriae	o__PAUC26f	f__norank_o__PAUC26f	g__norank_f__norank_o__PAUC26f	s__metagenome_g__norank_f__norank_o__PAUC26f	OTU3168	7	1	0	0	3	1	3	1	0	1	0	0	0	0	0	0	0	0	0	0	17
d__Bacteria	k__norank_d__Bacteria	p__Patescibacteria	c__ABY1	o__Candidatus_Falkowbacteria	f__norank_o__Candidatus_Falkowbacteria	g__norank_f__norank_o__Candidatus_Falkowbacteria	s__unclassified_g__norank_f__norank_o__Candidatus_Falkowbacteria	OTU538	0	2	0	0	0	0	0	0	0	0	0	0	0	0	0	0	0	0	0	0	2
d__Bacteria	k__norank_d__Bacteria	p__Verrucomicrobiota	c__Chlamydiae	o__Chlamydiales	f__Parachlamydiaceae	g__Neochlamydia	s__uncultured_bacterium_g__Neochlamydia	OTU3984	2	0	2	0	1	0	0	0	0	1	0	0	0	0	1	0	0	0	0	0	7
d__Bacteria	k__norank_d__Bacteria	p__Cyanobacteria	c__Cyanobacteriia	o__Chloroplast	f__norank_o__Chloroplast	g__norank_f__norank_o__Chloroplast	s__Vischeria_sp._CAUP_Q_202	OTU1561	15	26	4	63	18	0	1	8	0	20	2	1	0	0	0	1	1	0	0	3	163
d__Bacteria	k__norank_d__Bacteria	p__Chloroflexi	c__Anaerolineae	o__SBR1031	f__A4b	g__unclassified_f__A4b	s__unclassified_f__A4b	OTU1233	1	0	1	0	1	0	0	0	0	0	0	0	0	0	0	0	0	0	0	0	3
d__Bacteria	k__norank_d__Bacteria	p__Myxococcota	c__Polyangia	o__PS-B29	f__norank_o__PS-B29	g__norank_f__norank_o__PS-B29	s__unclassified_g__norank_f__norank_o__PS-B29	OTU433	0	2	0	0	0	0	2	0	2	1	0	0	1	0	0	0	0	0	0	0	8
d__Bacteria	k__norank_d__Bacteria	p__Firmicutes	c__Clostridia	o__unclassified_c__Clostridia	f__unclassified_c__Clostridia	g__unclassified_c__Clostridia	s__unclassified_c__Clostridia	OTU2026	0	1	0	0	1	0	0	0	0	0	0	0	0	0	0	0	0	0	0	0	2
d__Bacteria	k__norank_d__Bacteria	p__Dependentiae	c__Babeliae	o__Babeliales	f__unclassified_o__Babeliales	g__unclassified_o__Babeliales	s__unclassified_o__Babeliales	OTU3251	0	0	0	0	0	0	0	0	1	0	0	0	0	0	0	0	1	0	0	0	2
d__Bacteria	k__norank_d__Bacteria	p__Chloroflexi	c__Anaerolineae	o__Anaerolineales	f__Anaerolineaceae	g__norank_f__Anaerolineaceae	s__unclassified_g__norank_f__Anaerolineaceae	OTU4069	0	1	0	0	0	0	2	1	3	0	0	0	0	0	0	0	0	0	0	0	7
d__Bacteria	k__norank_d__Bacteria	p__Chloroflexi	c__Anaerolineae	o__Anaerolineales	f__Anaerolineaceae	g__norank_f__Anaerolineaceae	s__metagenome_g__norank_f__Anaerolineaceae	OTU3747	6	1	4	1	14	3	7	2	3	8	0	0	0	0	0	0	0	0	0	0	49
d__Bacteria	k__norank_d__Bacteria	p__Spirochaetota	c__Spirochaetia	o__Spirochaetales	f__Spirochaetaceae	g__Treponema	s__unclassified_g__Treponema	OTU7257	0	0	0	0	0	0	0	0	0	0	0	0	0	1	0	0	1	0	0	0	2
d__Bacteria	k__norank_d__Bacteria	p__Proteobacteria	c__Alphaproteobacteria	o__Defluviicoccales	f__Defluviicoccaceae	g__Defluviicoccus	s__metagenome_g__Defluviicoccus	OTU898	2	1	11	15	0	3	3	7	5	2	0	0	0	0	0	0	0	1	0	0	50
d__Bacteria	k__norank_d__Bacteria	p__Chloroflexi	c__Dehalococcoidia	o__GIF9	f__norank_o__GIF9	g__norank_f__norank_o__GIF9	s__unclassified_g__norank_f__norank_o__GIF9	OTU1595	0	0	0	2	0	0	0	0	0	0	0	0	0	0	0	0	0	0	0	0	2
d__Bacteria	k__norank_d__Bacteria	p__Planctomycetota	c__Phycisphaerae	o__Phycisphaerales	f__Phycisphaeraceae	g__norank_f__Phycisphaeraceae	s__unclassified_g__norank_f__Phycisphaeraceae	OTU2940	0	0	0	0	0	2	0	0	0	0	1	0	0	0	0	0	0	0	0	0	3
d__Bacteria	k__norank_d__Bacteria	p__Proteobacteria	c__Gammaproteobacteria	o__Burkholderiales	f__Rhodocyclaceae	g__Dechloromonas	s__uncultured_bacterium_g__Dechloromonas	OTU6624	8	37	25	33	8	2	9	6	1	32	16	50	57	49	34	17	20	66	71	80	621
d__Bacteria	k__norank_d__Bacteria	p__Bacteroidota	c__Bacteroidia	o__Sphingobacteriales	f__KD1-131	g__norank_f__KD1-131	s__uncultured_bacterium_g__norank_f__KD1-131	OTU8667	0	1	0	1	0	0	1	0	0	0	0	1	1	0	1	0	1	2	0	3	12
d__Bacteria	k__norank_d__Bacteria	p__Proteobacteria	c__Alphaproteobacteria	o__Acetobacterales	f__Acetobacteraceae	g__Roseomonas	s__uncultured_Roseomonas_sp._g__Roseomonas	OTU3501	39	48	25	67	32	17	91	114	118	237	6	9	1	10	1	16	21	5	19	9	885
d__Bacteria	k__norank_d__Bacteria	p__Chloroflexi	c__Anaerolineae	o__Caldilineales	f__Caldilineaceae	g__norank_f__Caldilineaceae	s__metagenome_g__norank_f__Caldilineaceae	OTU1255	5	10	21	16	2	1	5	2	0	5	0	0	0	0	0	0	0	0	0	0	67
d__Bacteria	k__norank_d__Bacteria	p__Acidobacteriota	c__Vicinamibacteria	o__Vicinamibacterales	f__Vicinamibacteraceae	g__norank_f__Vicinamibacteraceae	s__unclassified_g__norank_f__Vicinamibacteraceae	OTU4855	4	0	1	4	1	4	2	1	0	1	1	0	0	0	0	0	0	0	0	1	20
d__Bacteria	k__norank_d__Bacteria	p__Bacteroidota	c__Bacteroidia	o__Chitinophagales	f__Saprospiraceae	g__norank_f__Saprospiraceae	s__unclassified_g__norank_f__Saprospiraceae	OTU1831	0	0	0	0	1	0	1	0	0	0	0	1	0	0	0	0	0	0	0	0	3
d__Bacteria	k__norank_d__Bacteria	p__Proteobacteria	c__Gammaproteobacteria	o__Gammaproteobacteria_Incertae_Sedis	f__unclassified_o__Gammaproteobacteria_Incertae_Sedis	g__Candidatus_Berkiella	s__uncultured_bacterium_g__Candidatus_Berkiella	OTU5887	0	0	0	0	0	1	0	1	0	0	0	0	0	0	0	3	1	2	3	1	12
d__Bacteria	k__norank_d__Bacteria	p__Bacteroidota	c__Bacteroidia	o__Bacteroidales	f__Paludibacteraceae	g__Paludibacter	s__uncultured_bacterium_g__Paludibacter	OTU7129	0	0	2	0	0	0	0	0	0	0	0	2	2	2	1	1	0	0	0	1	11
d__Bacteria	k__norank_d__Bacteria	p__Planctomycetota	c__Planctomycetes	o__Isosphaerales	f__Isosphaeraceae	g__unclassified_f__Isosphaeraceae	s__unclassified_f__Isosphaeraceae	OTU1340	2	0	1	0	1	0	0	0	0	0	1	0	0	0	0	0	0	0	0	0	5
d__Bacteria	k__norank_d__Bacteria	p__Proteobacteria	c__Alphaproteobacteria	o__Rhodobacterales	f__Rhodobacteraceae	g__Defluviimonas	s__uncultured_bacterium_g__Defluviimonas	OTU910	13	10	31	26	126	7	32	33	12	22	2	6	3	5	1	0	3	1	1	0	334
d__Bacteria	k__norank_d__Bacteria	p__Latescibacterota	c__norank_p__Latescibacterota	o__norank_c__norank_p__Latescibacterota	f__norank_o__norank_c__norank_p__Latescibacterota	g__norank_f__norank_o__norank_c__norank_p__Latescibacterota	s__saltmarsh_clone_LCP-67	OTU4725	0	0	0	0	0	0	2	1	0	2	0	0	0	0	0	0	0	0	0	0	5
d__Bacteria	k__norank_d__Bacteria	p__Chloroflexi	c__JG30-KF-CM66	o__norank_c__JG30-KF-CM66	f__norank_o__norank_c__JG30-KF-CM66	g__norank_f__norank_o__norank_c__JG30-KF-CM66	s__unclassified_g__norank_f__norank_o__norank_c__JG30-KF-CM66	OTU400	21	1	0	0	0	2	0	0	0	1	0	0	0	0	0	0	0	0	0	0	25
d__Bacteria	k__norank_d__Bacteria	p__Chloroflexi	c__Anaerolineae	o__Anaerolineales	f__Anaerolineaceae	g__norank_f__Anaerolineaceae	s__unclassified_g__norank_f__Anaerolineaceae	OTU73	1	0	0	1	6	0	0	1	0	0	0	0	0	0	0	0	0	0	0	0	9
d__Bacteria	k__norank_d__Bacteria	p__unclassified_k__norank_d__Bacteria	c__unclassified_k__norank_d__Bacteria	o__unclassified_k__norank_d__Bacteria	f__unclassified_k__norank_d__Bacteria	g__unclassified_k__norank_d__Bacteria	s__unclassified_k__norank_d__Bacteria	OTU2313	1	0	0	0	0	0	0	0	0	0	0	0	0	0	0	0	0	0	0	0	1
d__Bacteria	k__norank_d__Bacteria	p__Patescibacteria	c__unclassified_p__Patescibacteria	o__unclassified_p__Patescibacteria	f__unclassified_p__Patescibacteria	g__unclassified_p__Patescibacteria	s__unclassified_p__Patescibacteria	OTU8852	0	0	0	0	0	0	0	0	0	1	0	0	0	0	0	0	0	0	0	0	1
d__Bacteria	k__norank_d__Bacteria	p__Actinobacteriota	c__Thermoleophilia	o__Solirubrobacterales	f__Solirubrobacteraceae	g__Conexibacter	s__unclassified_g__Conexibacter	OTU8014	0	0	0	0	0	0	0	0	0	0	0	0	0	0	0	0	2	0	0	0	2
d__Bacteria	k__norank_d__Bacteria	p__Spirochaetota	c__Leptospirae	o__Leptospirales	f__Leptospiraceae	g__RBG-16-49-21	s__unclassified_g__RBG-16-49-21	OTU8304	1	13	9	16	0	0	12	3	3	1	0	0	0	0	0	0	1	0	0	1	60
d__Bacteria	k__norank_d__Bacteria	p__Actinobacteriota	c__Actinobacteria	o__Micrococcales	f__Microbacteriaceae	g__Microbacterium	s__unclassified_g__Microbacterium	OTU1022	51	66	51	49	76	21	16	16	25	12	10	8	4	7	10	8	17	13	15	11	486
d__Bacteria	k__norank_d__Bacteria	p__Armatimonadota	c__Chthonomonadetes	o__Chthonomonadales	f__Chthonomonadaceae	g__Chthonomonas	s__uncultured_bacterium_g__Chthonomonas	OTU1655	0	0	0	2	0	0	0	0	0	0	0	0	0	0	0	0	0	0	0	0	2
d__Bacteria	k__norank_d__Bacteria	p__Bacteroidota	c__Bacteroidia	o__Chitinophagales	f__Chitinophagaceae	g__Aurantisolimonas	s__uncultured_bacterium_g__Aurantisolimonas	OTU6538	0	0	0	1	0	0	0	1	0	3	0	0	0	0	0	1	0	0	0	0	6
d__Bacteria	k__norank_d__Bacteria	p__Myxococcota	c__Polyangia	o__UASB-TL25	f__norank_o__UASB-TL25	g__norank_f__norank_o__UASB-TL25	s__uncultured_bacterium_g__norank_f__norank_o__UASB-TL25	OTU4241	0	0	0	0	4	1	5	2	4	3	0	0	0	0	0	0	0	0	0	0	19
d__Bacteria	k__norank_d__Bacteria	p__Bacteroidota	c__Bacteroidia	o__Cytophagales	f__Cyclobacteriaceae	g__Shivajiella	s__uncultured_Aquiflexum_sp._g__Shivajiella	OTU5459	0	0	0	0	0	0	0	0	1	0	0	0	0	0	0	1	0	0	0	0	2
d__Bacteria	k__norank_d__Bacteria	p__Firmicutes	c__Clostridia	o__Peptostreptococcales-Tissierellales	f__Fusibacteraceae	g__Fusibacter	s__uncultured_bacterium_g__Fusibacter	OTU8697	0	0	0	0	0	0	0	1	0	3	0	0	0	0	0	0	0	1	0	3	8
d__Bacteria	k__norank_d__Bacteria	p__Desulfobacterota	c__Desulfomonilia	o__Desulfomonilales	f__Desulfomonilaceae	g__Desulfomonile	s__uncultured_bacterium_g__Desulfomonile	OTU4454	1	1	1	0	4	0	1	3	2	2	1	0	0	0	0	0	0	0	0	1	17
d__Bacteria	k__norank_d__Bacteria	p__Desulfobacterota	c__Desulfomonilia	o__Desulfomonilales	f__Desulfomonilaceae	g__Desulfomonile	s__uncultured_bacterium_g__Desulfomonile	OTU4456	0	2	0	1	2	0	1	5	2	6	0	1	0	0	0	1	0	0	0	0	21
d__Bacteria	k__norank_d__Bacteria	p__Proteobacteria	c__Alphaproteobacteria	o__Elsterales	f__norank_o__Elsterales	g__norank_f__norank_o__Elsterales	s__metagenome_g__norank_f__norank_o__Elsterales	OTU975	3	1	1	1	0	1	1	0	0	0	0	0	0	0	0	0	0	0	0	0	8
d__Bacteria	k__norank_d__Bacteria	p__Acidobacteriota	c__Thermoanaerobaculia	o__Thermoanaerobaculales	f__Thermoanaerobaculaceae	g__Subgroup_23	s__unclassified_g__Subgroup_23	OTU3853	0	0	0	0	1	0	0	0	1	1	0	0	0	0	0	0	0	0	0	0	3
d__Bacteria	k__norank_d__Bacteria	p__Proteobacteria	c__Gammaproteobacteria	o__Burkholderiales	f__Chitinimonadaceae	g__Chitinivorax	s__unclassified_g__Chitinivorax	OTU6743	0	2	2	2	0	0	0	0	0	0	20	29	30	32	12	10	4	20	31	58	252
d__Bacteria	k__norank_d__Bacteria	p__Proteobacteria	c__Gammaproteobacteria	o__Oceanospirillales	f__Halomonadaceae	g__Halomonas	s__unclassified_g__Halomonas	OTU6271	3	8	21	27	6	2	8	5	1	8	14	7	17	8	5	0	0	3	1	0	144
d__Bacteria	k__norank_d__Bacteria	p__Acidobacteriota	c__Aminicenantia	o__Aminicenantales	f__norank_o__Aminicenantales	g__norank_f__norank_o__Aminicenantales	s__uncultured_bacterium_g__norank_f__norank_o__Aminicenantales	OTU5194	0	0	0	0	0	0	1	1	5	2	0	0	0	0	0	0	0	0	0	0	9
d__Bacteria	k__norank_d__Bacteria	p__Actinobacteriota	c__RBG-16-55-12	o__norank_c__RBG-16-55-12	f__norank_o__norank_c__RBG-16-55-12	g__norank_f__norank_o__norank_c__RBG-16-55-12	s__uncultured_actinomycete_g__norank	OTU3799	0	0	0	0	0	0	3	0	3	1	0	0	0	0	0	0	0	0	0	0	7
d__Bacteria	k__norank_d__Bacteria	p__Cyanobacteria	c__Cyanobacteriia	o__Chloroplast	f__norank_o__Chloroplast	g__norank_f__norank_o__Chloroplast	s__unclassified_g__norank_f__norank_o__Chloroplast	OTU6905	0	0	0	0	0	0	0	0	0	0	1	1	0	1	0	0	0	0	0	0	3
d__Bacteria	k__norank_d__Bacteria	p__Cyanobacteria	c__Cyanobacteriia	o__Chloroplast	f__norank_o__Chloroplast	g__norank_f__norank_o__Chloroplast	s__unclassified_g__norank_f__norank_o__Chloroplast	OTU6901	0	0	0	0	0	0	0	0	0	0	28	55	3	8	10	3	12	2	0	0	121
d__Bacteria	k__norank_d__Bacteria	p__Proteobacteria	c__Gammaproteobacteria	o__Legionellales	f__Legionellaceae	g__Legionella	s__unclassified_g__Legionella	OTU6739	0	0	0	0	0	0	0	0	0	0	1	0	0	1	1	0	0	0	0	0	3
d__Bacteria	k__norank_d__Bacteria	p__Chloroflexi	c__Anaerolineae	o__unclassified_c__Anaerolineae	f__unclassified_c__Anaerolineae	g__unclassified_c__Anaerolineae	s__unclassified_c__Anaerolineae	OTU4537	1	0	0	0	0	1	0	1	1	0	0	0	0	0	0	0	0	0	0	0	4
d__Bacteria	k__norank_d__Bacteria	p__Cyanobacteria	c__Cyanobacteriia	o__Chloroplast	f__norank_o__Chloroplast	g__norank_f__norank_o__Chloroplast	s__unclassified_g__norank_f__norank_o__Chloroplast	OTU6908	0	0	0	0	0	0	0	0	0	0	28	32	5	9	20	2	1	0	0	0	97
d__Bacteria	k__norank_d__Bacteria	p__Cyanobacteria	c__Cyanobacteriia	o__Chloroplast	f__norank_o__Chloroplast	g__norank_f__norank_o__Chloroplast	s__unclassified_g__norank_f__norank_o__Chloroplast	OTU6909	0	0	0	0	0	0	0	0	0	0	1	6	1	2	3	0	0	0	0	0	13
d__Bacteria	k__norank_d__Bacteria	p__Chloroflexi	c__Dehalococcoidia	o__GIF9	f__unclassified_o__GIF9	g__unclassified_o__GIF9	s__unclassified_o__GIF9	OTU4023	0	0	0	0	0	0	1	0	0	0	0	0	0	0	0	0	0	0	0	0	1
d__Bacteria	k__norank_d__Bacteria	p__Verrucomicrobiota	c__Chlamydiae	o__Chlamydiales	f__Parachlamydiaceae	g__Neochlamydia	s__uncultured_bacterium_g__Neochlamydia	OTU5748	0	0	0	0	0	0	1	0	0	1	0	0	0	0	0	0	0	0	0	0	2
d__Bacteria	k__norank_d__Bacteria	p__Proteobacteria	c__Gammaproteobacteria	o__Xanthomonadales	f__Xanthomonadaceae	g__Arenimonas	s__uncultured_bacterium_g__Arenimonas	OTU5118	8	4	0	7	0	0	1	0	1	1	3	1	0	0	0	0	0	0	0	0	26
d__Bacteria	k__norank_d__Bacteria	p__WS2	c__norank_p__WS2	o__norank_c__norank_p__WS2	f__norank_o__norank_c__norank_p__WS2	g__norank_f__norank_o__norank_c__norank_p__WS2	s__unclassified_g__norank_f__norank_o__norank_c__norank_p__WS2	OTU1076	0	0	1	1	0	1	2	1	0	1	0	0	0	0	0	0	0	0	0	0	7
d__Bacteria	k__norank_d__Bacteria	p__Acidobacteriota	c__Subgroup_25	o__norank_c__Subgroup_25	f__norank_o__norank_c__Subgroup_25	g__norank_f__norank_o__norank_c__Subgroup_25	s__uncultured_bacterium_g__norank_f__norank_o__norank_c__Subgroup_25	OTU4225	0	1	0	0	0	1	2	3	0	0	0	0	0	0	0	0	0	0	0	0	7
d__Bacteria	k__norank_d__Bacteria	p__Desulfobacterota	c__Desulfobacteria	o__Desulfobacterales	f__Desulfobacteraceae	g__norank_f__Desulfobacteraceae	s__uncultured_delta_proteobacterium_g__norank_f__Desulfobacteraceae	OTU7914	0	1	0	0	0	0	0	0	0	0	0	0	0	0	0	0	0	0	0	0	1
d__Bacteria	k__norank_d__Bacteria	p__Nitrospirota	c__Thermodesulfovibrionia	o__norank_c__Thermodesulfovibrionia	f__norank_o__norank_c__Thermodesulfovibrionia	g__norank_f__norank_o__norank_c__Thermodesulfovibrionia	s__uncultured_bacterium_g__norank_f__norank_o__norank_c__Thermodesulfovibrionia	OTU2688	1	0	0	0	0	4	0	0	0	0	0	0	0	0	0	0	0	0	0	0	5
d__Bacteria	k__norank_d__Bacteria	p__Acidobacteriota	c__Acidobacteriae	o__Subgroup_2	f__norank_o__Subgroup_2	g__norank_f__norank_o__Subgroup_2	s__unclassified_g__norank_f__norank_o__Subgroup_2	OTU2896	0	0	0	0	0	2	0	0	0	0	0	0	0	0	0	0	0	0	0	0	2
d__Bacteria	k__norank_d__Bacteria	p__Desulfobacterota	c__Desulfobacteria	o__Desulfobacterales	f__Desulfobacteraceae	g__norank_f__Desulfobacteraceae	s__uncultured_delta_proteobacterium_g__norank_f__Desulfobacteraceae	OTU7918	0	1	0	0	0	0	0	0	0	0	0	0	0	0	0	0	0	0	0	0	1
d__Bacteria	k__norank_d__Bacteria	p__Desulfobacterota	c__Desulfobaccia	o__Desulfobaccales	f__Desulfobaccaceae	g__Desulfobacca	s__unclassified_g__Desulfobacca	OTU4384	0	1	2	0	0	0	0	0	0	1	0	0	0	0	0	0	0	0	0	0	4
d__Bacteria	k__norank_d__Bacteria	p__Myxococcota	c__Polyangia	o__Polyangiales	f__BIrii41	g__norank_f__BIrii41	s__metagenome_g__norank_f__BIrii41	OTU4303	0	1	2	1	0	3	1	2	0	0	0	0	0	0	0	0	0	0	0	0	10
d__Bacteria	k__norank_d__Bacteria	p__Patescibacteria	c__Saccharimonadia	o__Saccharimonadales	f__norank_o__Saccharimonadales	g__norank_f__norank_o__Saccharimonadales	s__unclassified_g__norank_f__norank_o__Saccharimonadales	OTU1090	0	0	3	8	1	0	0	2	0	0	0	0	0	0	0	0	0	0	0	0	14
d__Bacteria	k__norank_d__Bacteria	p__unclassified_k__norank_d__Bacteria	c__unclassified_k__norank_d__Bacteria	o__unclassified_k__norank_d__Bacteria	f__unclassified_k__norank_d__Bacteria	g__unclassified_k__norank_d__Bacteria	s__unclassified_k__norank_d__Bacteria	OTU3490	0	2	0	0	0	3	2	2	0	2	0	0	0	0	0	0	0	0	0	0	11
d__Bacteria	k__norank_d__Bacteria	p__Latescibacterota	c__norank_p__Latescibacterota	o__norank_c__norank_p__Latescibacterota	f__norank_o__norank_c__norank_p__Latescibacterota	g__norank_f__norank_o__norank_c__norank_p__Latescibacterota	s__uncultured_bacterium_g__norank_f__norank_o__norank_c__norank_p__Latescibacterota	OTU5858	0	0	0	0	1	2	0	1	1	1	0	0	0	0	0	0	0	0	0	0	6
d__Bacteria	k__norank_d__Bacteria	p__Armatimonadota	c__norank_p__Armatimonadota	o__norank_c__norank_p__Armatimonadota	f__norank_o__norank_c__norank_p__Armatimonadota	g__norank_f__norank_o__norank_c__norank_p__Armatimonadota	s__uncultured_bacterium_g__norank_f__norank_o__norank_c__norank_p__Armatimonadota	OTU730	0	2	3	0	0	1	0	0	0	0	0	0	1	0	0	0	0	0	0	0	7
d__Bacteria	k__norank_d__Bacteria	p__Verrucomicrobiota	c__Verrucomicrobiae	o__Verrucomicrobiales	f__Akkermansiaceae	g__Akkermansia	s__Akkermansia_muciniphila	OTU8569	0	7	0	0	1	0	0	0	0	0	6	8	22	8	2	0	0	1	1	1	57
d__Bacteria	k__norank_d__Bacteria	p__Bacteroidota	c__Bacteroidia	o__Chitinophagales	f__Chitinophagaceae	g__Dinghuibacter	s__uncultured_bacterium_g__Dinghuibacter	OTU6155	30	58	25	70	21	17	86	81	8	178	7	4	6	4	2	9	6	1	11	3	627
d__Bacteria	k__norank_d__Bacteria	p__Actinobacteriota	c__Acidimicrobiia	o__Microtrichales	f__norank_o__Microtrichales	g__norank_f__norank_o__Microtrichales	s__uncultured_bacterium_g__norank_f__norank_o__Microtrichales	OTU4272	13	7	11	5	19	11	9	16	0	9	0	0	1	0	1	0	0	0	0	0	102
d__Bacteria	k__norank_d__Bacteria	p__Cyanobacteria	c__Cyanobacteriia	o__Oxyphotobacteria_Incertae_Sedis	f__unclassified_o__Oxyphotobacteria_Incertae_Sedis	g__Oscillatoria_SAG_1459-8	s__uncultured_bacterium_g__Oscillatoria_SAG_1459-8	OTU14	3	0	0	0	0	0	0	0	0	0	1	0	0	0	0	0	0	0	0	0	4
d__Bacteria	k__norank_d__Bacteria	p__Spirochaetota	c__Leptospirae	o__Leptospirales	f__Leptospiraceae	g__RBG-16-49-21	s__uncultured_bacterium_SJA-88	OTU980	0	4	2	4	1	0	0	1	23	1	1	0	0	0	0	0	0	0	0	0	37
d__Bacteria	k__norank_d__Bacteria	p__Proteobacteria	c__Alphaproteobacteria	o__Rickettsiales	f__SM2D12	g__norank_f__SM2D12	s__unclassified_g__norank_f__SM2D12	OTU8542	0	0	0	0	0	0	0	0	0	0	0	0	0	0	0	0	0	0	1	0	1
d__Bacteria	k__norank_d__Bacteria	p__Patescibacteria	c__Saccharimonadia	o__Saccharimonadales	f__LWQ8	g__norank_f__LWQ8	s__uncultured_bacterium_g__norank_f__LWQ8	OTU1276	0	2	5	3	0	0	0	0	0	0	1	2	1	1	2	0	0	0	0	0	17
d__Bacteria	k__norank_d__Bacteria	p__Patescibacteria	c__Dojkabacteria	o__norank_c__Dojkabacteria	f__norank_o__norank_c__Dojkabacteria	g__norank_f__norank_o__norank_c__Dojkabacteria	s__unclassified_g__norank_f__norank_o__norank_c__Dojkabacteria	OTU7621	0	0	0	0	0	0	0	0	1	0	0	0	0	0	0	0	0	0	0	0	1
d__Bacteria	k__norank_d__Bacteria	p__Proteobacteria	c__Alphaproteobacteria	o__Rickettsiales	f__norank_o__Rickettsiales	g__Candidatus_Jidaibacter	s__unclassified_g__Candidatus_Jidaibacter	OTU7516	0	0	0	0	0	0	0	0	0	0	0	0	0	0	0	0	0	1	0	0	1
d__Bacteria	k__norank_d__Bacteria	p__Firmicutes	c__Bacilli	o__RF39	f__norank_o__RF39	g__norank_f__norank_o__RF39	s__uncultured_bacterium_g__norank_f__norank_o__RF39	OTU6967	0	1	0	0	0	0	0	0	0	0	1	0	1	0	1	0	0	0	0	0	4
d__Bacteria	k__norank_d__Bacteria	p__unclassified_k__norank_d__Bacteria	c__unclassified_k__norank_d__Bacteria	o__unclassified_k__norank_d__Bacteria	f__unclassified_k__norank_d__Bacteria	g__unclassified_k__norank_d__Bacteria	s__unclassified_k__norank_d__Bacteria	OTU8061	0	0	0	0	0	0	0	0	0	0	0	0	0	0	0	0	0	1	0	0	1
d__Bacteria	k__norank_d__Bacteria	p__Proteobacteria	c__Gammaproteobacteria	o__Burkholderiales	f__Nitrosomonadaceae	g__Nitrosomonas	s__metagenome_g__Nitrosomonas	OTU1245	0	0	2	5	2	0	0	0	0	0	0	0	0	0	0	0	0	0	0	0	9
d__Bacteria	k__norank_d__Bacteria	p__Planctomycetota	c__Planctomycetes	o__Gemmatales	f__Gemmataceae	g__norank_f__Gemmataceae	s__uncultured_bacterium_g__norank_f__Gemmataceae	OTU4968	0	0	0	0	1	0	0	0	0	0	0	0	0	0	0	0	0	0	0	0	1
d__Bacteria	k__norank_d__Bacteria	p__Chloroflexi	c__Dehalococcoidia	o__GIF3	f__norank_o__GIF3	g__norank_f__norank_o__GIF3	s__unclassified_g__norank_f__norank_o__GIF3	OTU4917	0	0	0	0	1	0	1	2	4	0	0	0	0	0	0	0	0	0	0	0	8
d__Bacteria	k__norank_d__Bacteria	p__Gemmatimonadota	c__S0134_terrestrial_group	o__norank_c__S0134_terrestrial_group	f__norank_o__norank_c__S0134_terrestrial_group	g__norank_f__norank_o__norank_c__S0134_terrestrial_group	s__uncultured_bacterium_g__norank_f__norank_o__norank_c__S0134_terrestrial_group	OTU1821	0	0	0	0	1	1	0	1	0	0	0	0	0	0	0	0	0	0	0	0	3
d__Bacteria	k__norank_d__Bacteria	p__Proteobacteria	c__Gammaproteobacteria	o__unclassified_c__Gammaproteobacteria	f__unclassified_c__Gammaproteobacteria	g__unclassified_c__Gammaproteobacteria	s__unclassified_c__Gammaproteobacteria	OTU3093	0	0	0	0	0	2	0	0	0	0	0	0	0	0	0	0	0	0	0	0	2
d__Bacteria	k__norank_d__Bacteria	p__Patescibacteria	c__Parcubacteria	o__Candidatus_Campbellbacteria	f__norank_o__Candidatus_Campbellbacteria	g__norank_f__norank_o__Candidatus_Campbellbacteria	s__unclassified_g__norank_f__norank_o__Candidatus_Campbellbacteria	OTU7106	0	0	0	0	0	0	0	0	0	0	0	0	1	0	0	0	0	0	0	0	1
d__Bacteria	k__norank_d__Bacteria	p__Chloroflexi	c__Anaerolineae	o__SBR1031	f__A4b	g__norank_f__A4b	s__unclassified_g__norank_f__A4b	OTU4575	16	2	1	0	0	13	1	1	0	0	0	0	1	0	0	0	0	0	0	0	35
d__Bacteria	k__norank_d__Bacteria	p__Proteobacteria	c__Gammaproteobacteria	o__Legionellales	f__Legionellaceae	g__Legionella	s__unclassified_g__Legionella	OTU1084	0	0	3	1	1	0	0	2	0	1	0	0	0	0	0	1	1	0	3	2	15
d__Bacteria	k__norank_d__Bacteria	p__Bdellovibrionota	c__Bdellovibrionia	o__Bdellovibrionales	f__Bdellovibrionaceae	g__Bdellovibrio	s__uncultured_soil_bacterium_g__Bdellovibrio	OTU4211	1	0	0	0	0	0	2	1	0	1	0	0	0	0	0	1	1	1	0	1	9
d__Bacteria	k__norank_d__Bacteria	p__Dependentiae	c__Babeliae	o__Babeliales	f__Vermiphilaceae	g__norank_f__Vermiphilaceae	s__unclassified_g__norank_f__Vermiphilaceae	OTU850	0	2	0	0	0	0	0	0	0	0	0	0	0	0	0	0	0	0	0	0	2
d__Bacteria	k__norank_d__Bacteria	p__Acidobacteriota	c__Acidobacteriae	o__Subgroup_12	f__norank_o__Subgroup_12	g__norank_f__norank_o__Subgroup_12	s__uncultured_bacterium_g__norank_f__norank_o__Subgroup_12	OTU3133	0	0	0	0	0	3	0	0	0	0	0	0	0	0	0	0	0	0	0	0	3
d__Bacteria	k__norank_d__Bacteria	p__Firmicutes	c__Limnochordia	o__norank_c__Limnochordia	f__norank_o__norank_c__Limnochordia	g__Hydrogenispora	s__uncultured_bacterium_g__Hydrogenispora	OTU2702	0	0	0	0	0	10	0	0	0	0	0	0	0	0	0	0	0	0	0	0	10
d__Bacteria	k__norank_d__Bacteria	p__Chloroflexi	c__Anaerolineae	o__SBR1031	f__norank_o__SBR1031	g__norank_f__norank_o__SBR1031	s__unclassified_g__norank_f__norank_o__SBR1031	OTU5265	0	0	0	0	0	0	0	0	1	0	0	0	0	0	0	0	0	0	0	0	1
d__Bacteria	k__norank_d__Bacteria	p__Verrucomicrobiota	c__Verrucomicrobiae	o__Verrucomicrobiales	f__Verrucomicrobiaceae	g__Roseimicrobium	s__uncultured_Verrucomicrobia_bacterium_g__Roseimicrobium	OTU1777	5	0	9	0	3	1	0	0	0	1	0	1	0	0	0	0	0	0	0	0	20
d__Bacteria	k__norank_d__Bacteria	p__Proteobacteria	c__Gammaproteobacteria	o__Halothiobacillales	f__Halothiobacillaceae	g__Thiovirga	s__uncultured_prokaryote_g__Thiovirga	OTU7892	0	0	0	0	0	0	0	0	0	0	0	0	0	0	0	1	0	2	0	2	5
d__Bacteria	k__norank_d__Bacteria	p__Myxococcota	c__Myxococcia	o__Myxococcales	f__Myxococcaceae	g__P3OB-42	s__metagenome_g__P3OB-42	OTU529	5	10	8	3	3	3	1	3	5	7	0	3	1	2	0	0	1	0	0	0	55
d__Bacteria	k__norank_d__Bacteria	p__Bacteroidota	c__Bacteroidia	o__Cytophagales	f__Microscillaceae	g__norank_f__Microscillaceae	s__unclassified_g__norank_f__Microscillaceae	OTU4539	1	7	2	5	3	0	11	8	1	36	0	0	0	1	0	2	0	1	6	5	89
d__Bacteria	k__norank_d__Bacteria	p__Acidobacteriota	c__Vicinamibacteria	o__Vicinamibacterales	f__Vicinamibacteraceae	g__Luteitalea	s__uncultured_bacterium_g__Luteitalea	OTU4285	8	4	7	1	17	2	6	10	0	8	0	1	0	0	0	0	0	0	1	0	65
d__Bacteria	k__norank_d__Bacteria	p__Firmicutes	c__Bacilli	o__Paenibacillales	f__Paenibacillaceae	g__Paenibacillus	s__Paenibacillus_validus_g__Paenibacillus	OTU2895	0	0	0	0	0	21	0	0	0	0	0	0	0	0	0	0	0	0	0	0	21
d__Bacteria	k__norank_d__Bacteria	p__Verrucomicrobiota	c__Kiritimatiellae	o__WCHB1-41	f__norank_o__WCHB1-41	g__norank_f__norank_o__WCHB1-41	s__uncultured_Kiritimatiellaeota_bacterium_g__norank	OTU6710	0	0	0	0	0	0	0	0	0	0	1	0	0	0	0	0	0	0	1	0	2
d__Bacteria	k__norank_d__Bacteria	p__Proteobacteria	c__Gammaproteobacteria	o__Alteromonadales	f__norank_o__Alteromonadales	g__norank_f__norank_o__Alteromonadales	s__Idiomarina_sp._g__norank	OTU6886	0	0	0	0	0	0	0	0	0	0	0	1	3	1	0	0	1	1	0	1	8
d__Bacteria	k__norank_d__Bacteria	p__Chloroflexi	c__Chloroflexia	o__Chloroflexales	f__Roseiflexaceae	g__norank_f__Roseiflexaceae	s__uncultured_Chloroflexaceae_bacterium_g__norank_f__Roseiflexaceae	OTU2690	8	2	3	2	3	21	27	7	2	1	0	0	0	3	0	0	0	0	0	0	79
d__Bacteria	k__norank_d__Bacteria	p__Acidobacteriota	c__Acidobacteriae	o__norank_c__Acidobacteriae	f__norank_o__norank_c__Acidobacteriae	g__Paludibaculum	s__unclassified_g__Paludibaculum	OTU5656	1	3	5	4	8	3	18	10	15	8	4	0	1	0	0	1	0	1	3	0	85
d__Bacteria	k__norank_d__Bacteria	p__Actinobacteriota	c__Actinobacteria	o__Streptosporangiales	f__Streptosporangiaceae	g__unclassified_f__Streptosporangiaceae	s__unclassified_f__Streptosporangiaceae	OTU991	1	1	2	1	0	0	3	1	2	1	1	0	0	0	0	0	1	0	0	0	14
d__Bacteria	k__norank_d__Bacteria	p__Chloroflexi	c__Anaerolineae	o__SBR1031	f__norank_o__SBR1031	g__norank_f__norank_o__SBR1031	s__uncultured_Gemmatimonadetes_bacterium_g__norank_f__norank	OTU122	5	0	1	0	2	2	3	1	0	3	0	0	0	1	0	0	0	0	0	0	18
d__Bacteria	k__norank_d__Bacteria	p__Cyanobacteria	c__Cyanobacteriia	o__Chloroplast	f__norank_o__Chloroplast	g__norank_f__norank_o__Chloroplast	s__uncultured_Phacus	OTU216	1	0	0	1	0	0	0	0	0	0	0	2	0	1	0	0	0	0	0	0	5
d__Bacteria	k__norank_d__Bacteria	p__Spirochaetota	c__Spirochaetia	o__Spirochaetales	f__Spirochaetaceae	g__Spirochaeta	s__unclassified_g__Spirochaeta	OTU5827	0	0	0	0	0	0	1	0	0	1	0	0	0	0	0	0	0	0	0	0	2
d__Bacteria	k__norank_d__Bacteria	p__Patescibacteria	c__Gracilibacteria	o__norank_c__Gracilibacteria	f__norank_o__norank_c__Gracilibacteria	g__norank_f__norank_o__norank_c__Gracilibacteria	s__unclassified_g__norank_f__norank_o__norank_c__Gracilibacteria	OTU6397	0	0	0	0	0	0	0	2	0	0	1	0	0	0	4	0	0	0	0	1	8
d__Bacteria	k__norank_d__Bacteria	p__Proteobacteria	c__Alphaproteobacteria	o__Paracaedibacterales	f__Paracaedibacteraceae	g__norank_f__Paracaedibacteraceae	s__uncultured_Alphaproteobacteria_bacterium_g__norank_f__Paracaedibacteraceae	OTU7160	0	0	0	0	0	0	0	0	0	0	0	0	0	1	0	0	0	0	0	0	1
d__Bacteria	k__norank_d__Bacteria	p__Chloroflexi	c__Chloroflexia	o__Chloroflexales	f__Chloroflexaceae	g__Chloronema	s__unclassified_g__Chloronema	OTU2159	1	0	1	0	6	0	2	10	0	11	0	0	0	0	0	0	0	0	1	0	32
d__Bacteria	k__norank_d__Bacteria	p__Proteobacteria	c__Alphaproteobacteria	o__Rhodospirillales	f__norank_o__Rhodospirillales	g__norank_f__norank_o__Rhodospirillales	s__unclassified_g__norank_f__norank_o__Rhodospirillales	OTU1315	2	1	2	0	0	0	0	0	0	2	0	0	0	0	0	0	0	1	3	0	11
d__Bacteria	k__norank_d__Bacteria	p__Acidobacteriota	c__Acidobacteriae	o__norank_c__Acidobacteriae	f__norank_o__norank_c__Acidobacteriae	g__Paludibaculum	s__unclassified_g__Paludibaculum	OTU7501	0	1	0	1	1	1	8	2	1	1	1	2	1	0	2	2	1	1	0	1	27
d__Bacteria	k__norank_d__Bacteria	p__Modulibacteria	c__Moduliflexia	o__Moduliflexales	f__Moduliflexaceae	g__norank_f__Moduliflexaceae	s__uncultured_bacterium_g__norank_f__Moduliflexaceae	OTU5602	0	0	0	0	0	0	0	0	2	0	0	0	0	0	0	0	0	0	0	0	2
d__Bacteria	k__norank_d__Bacteria	p__Verrucomicrobiota	c__Kiritimatiellae	o__WCHB1-41	f__norank_o__WCHB1-41	g__norank_f__norank_o__WCHB1-41	s__uncultured_Verrucomicrobiales_bacterium_g__norank	OTU963	0	1	1	0	0	0	0	0	0	0	0	0	0	0	0	0	0	0	0	0	2
d__Bacteria	k__norank_d__Bacteria	p__Bacteroidota	c__Bacteroidia	o__Bacteroidales	f__Paludibacteraceae	g__Paludibacter	s__uncultured_bacterium_g__Paludibacter	OTU8710	0	0	0	0	0	0	0	0	0	0	1	2	12	1	5	0	0	2	6	4	33
d__Bacteria	k__norank_d__Bacteria	p__Bacteroidota	c__Bacteroidia	o__Flavobacteriales	f__Flavobacteriaceae	g__Flavobacterium	s__uncultured_Flavobacterium_sp._g__Flavobacterium	OTU7213	0	1	2	0	0	0	0	0	0	0	49	17	64	76	69	0	1	3	5	6	293
d__Bacteria	k__norank_d__Bacteria	p__Myxococcota	c__Polyangia	o__Haliangiales	f__Haliangiaceae	g__Haliangium	s__uncultured_bacterium_g__Haliangium	OTU4014	0	0	0	0	0	0	2	0	0	1	0	0	0	0	0	0	0	0	0	0	3
d__Bacteria	k__norank_d__Bacteria	p__Firmicutes	c__Bacilli	o__Lactobacillales	f__Enterococcaceae	g__Enterococcus	s__Enterococcus_faecium_g__Enterococcus	OTU7876	0	3	4	3	3	0	0	0	0	0	2	4	3	1	5	1	2	0	1	5	37
d__Bacteria	k__norank_d__Bacteria	p__Caldisericota	c__Caldisericia	o__Caldisericales	f__WCHB1-02	g__norank_f__WCHB1-02	s__uncultured_eubacterium_WCHB1-02	OTU6127	0	6	3	0	1	0	2	2	15	3	0	0	0	0	0	0	0	0	0	0	32
d__Bacteria	k__norank_d__Bacteria	p__Patescibacteria	c__Dojkabacteria	o__norank_c__Dojkabacteria	f__norank_o__norank_c__Dojkabacteria	g__norank_f__norank_o__norank_c__Dojkabacteria	s__uncultured_bacterium_g__norank_f__norank_o__norank_c__Dojkabacteria	OTU7820	0	0	0	0	0	0	1	0	0	0	0	0	0	0	0	0	0	0	0	0	1
d__Bacteria	k__norank_d__Bacteria	p__Chloroflexi	c__Chloroflexia	o__Chloroflexales	f__Chloroflexaceae	g__unclassified_f__Chloroflexaceae	s__unclassified_f__Chloroflexaceae	OTU2156	0	0	0	0	18	0	2	1	0	0	0	0	0	0	0	0	0	0	1	0	22
d__Bacteria	k__norank_d__Bacteria	p__Bacteroidota	c__SJA-28	o__norank_c__SJA-28	f__norank_o__norank_c__SJA-28	g__norank_f__norank_o__norank_c__SJA-28	s__metagenome_g__norank_f__norank_o__norank_c__SJA-28	OTU1037	2	2	16	6	1	0	0	2	0	0	2	0	1	0	0	0	0	0	0	0	32
d__Bacteria	k__norank_d__Bacteria	p__Spirochaetota	c__Spirochaetia	o__Spirochaetales	f__Spirochaetaceae	g__GWE2-31-10	s__unclassified_g__GWE2-31-10	OTU3506	0	0	0	0	0	0	0	0	1	1	0	0	0	0	0	0	0	0	0	0	2
d__Bacteria	k__norank_d__Bacteria	p__Proteobacteria	c__Alphaproteobacteria	o__Micavibrionales	f__Micavibrionaceae	g__norank_f__Micavibrionaceae	s__uncultured_bacterium_g__norank_f__Micavibrionaceae	OTU7309	0	0	0	0	0	0	0	0	0	0	0	0	0	0	2	0	0	0	0	0	2
d__Bacteria	k__norank_d__Bacteria	p__unclassified_k__norank_d__Bacteria	c__unclassified_k__norank_d__Bacteria	o__unclassified_k__norank_d__Bacteria	f__unclassified_k__norank_d__Bacteria	g__unclassified_k__norank_d__Bacteria	s__unclassified_k__norank_d__Bacteria	OTU3681	0	1	0	0	0	0	0	0	0	0	0	0	0	0	0	0	1	0	0	0	2
d__Bacteria	k__norank_d__Bacteria	p__Firmicutes	c__Clostridia	o__Christensenellales	f__Christensenellaceae	g__Christensenellaceae_R-7_group	s__uncultured_bacterium_g__Christensenellaceae_R-7_group	OTU3396	2	10	7	15	1	13	7	0	0	0	1	1	2	1	1	0	0	1	1	3	66
d__Bacteria	k__norank_d__Bacteria	p__Firmicutes	c__Clostridia	o__Christensenellales	f__Christensenellaceae	g__Christensenellaceae_R-7_group	s__unclassified_g__Christensenellaceae_R-7_group	OTU3097	0	0	0	0	0	27	2	0	0	0	0	0	0	0	0	0	0	0	0	0	29
d__Bacteria	k__norank_d__Bacteria	p__Verrucomicrobiota	c__Chlamydiae	o__Chlamydiales	f__Parachlamydiaceae	g__unclassified_f__Parachlamydiaceae	s__unclassified_f__Parachlamydiaceae	OTU46	2	0	0	0	0	0	0	0	0	0	0	0	0	0	0	0	0	0	0	0	2
d__Bacteria	k__norank_d__Bacteria	p__Bacteroidota	c__Rhodothermia	o__Balneolales	f__Balneolaceae	g__unclassified_f__Balneolaceae	s__unclassified_f__Balneolaceae	OTU8744	0	0	0	0	0	0	0	0	0	0	0	0	0	0	0	0	0	0	1	2	3
d__Bacteria	k__norank_d__Bacteria	p__Myxococcota	c__Polyangia	o__Polyangiales	f__Sandaracinaceae	g__norank_f__Sandaracinaceae	s__uncultured_bacterium_g__norank_f__Sandaracinaceae	OTU358	1	0	0	0	2	5	3	0	0	0	0	0	0	0	0	0	0	0	0	0	11
d__Bacteria	k__norank_d__Bacteria	p__Spirochaetota	c__Leptospirae	o__Leptospirales	f__Leptospiraceae	g__RBG-16-49-21	s__unclassified_g__RBG-16-49-21	OTU6592	0	1	0	1	1	0	1	0	0	0	0	0	0	0	0	0	0	0	0	0	4
d__Bacteria	k__norank_d__Bacteria	p__Proteobacteria	c__Alphaproteobacteria	o__norank_c__Alphaproteobacteria	f__norank_o__norank_c__Alphaproteobacteria	g__norank_f__norank_o__norank_c__Alphaproteobacteria	s__uncultured_bacterium_g__norank_f__norank_o__norank_c__Alphaproteobacteria	OTU3264	20	1	1	0	1	11	6	5	5	1	0	0	0	0	0	0	0	0	0	0	51
d__Bacteria	k__norank_d__Bacteria	p__Spirochaetota	c__Leptospirae	o__Leptospirales	f__Leptospiraceae	g__RBG-16-49-21	s__unclassified_g__RBG-16-49-21	OTU5642	1	16	18	31	0	1	23	2	7	3	0	1	0	0	1	0	1	0	0	0	105
d__Bacteria	k__norank_d__Bacteria	p__Spirochaetota	c__Leptospirae	o__Leptospirales	f__Leptospiraceae	g__RBG-16-49-21	s__unclassified_g__RBG-16-49-21	OTU5643	0	0	0	0	0	0	0	0	2	0	0	0	0	0	0	0	0	0	0	0	2
d__Bacteria	k__norank_d__Bacteria	p__Bacteroidota	c__Bacteroidia	o__Chitinophagales	f__Chitinophagaceae	g__Dinghuibacter	s__metagenome_g__Dinghuibacter	OTU8446	0	0	0	0	0	1	1	0	0	0	27	46	16	19	15	13	29	10	16	22	215
d__Bacteria	k__norank_d__Bacteria	p__unclassified_k__norank_d__Bacteria	c__unclassified_k__norank_d__Bacteria	o__unclassified_k__norank_d__Bacteria	f__unclassified_k__norank_d__Bacteria	g__unclassified_k__norank_d__Bacteria	s__unclassified_k__norank_d__Bacteria	OTU4418	0	1	0	0	0	0	1	3	2	1	0	0	0	0	0	0	0	0	0	0	8
d__Bacteria	k__norank_d__Bacteria	p__Proteobacteria	c__Gammaproteobacteria	o__Burkholderiales	f__Comamonadaceae	g__Hydrogenophaga	s__uncultured_bacterium_g__Hydrogenophaga	OTU6971	1	0	0	0	0	0	0	0	0	0	3	5	1	2	2	2	0	2	1	2	21
d__Bacteria	k__norank_d__Bacteria	p__Planctomycetota	c__Phycisphaerae	o__Phycisphaerales	f__Phycisphaeraceae	g__SM1A02	s__uncultured_bacterium_g__SM1A02	OTU3866	1	0	0	0	0	0	0	0	0	0	0	0	0	0	0	0	0	0	0	0	1
d__Bacteria	k__norank_d__Bacteria	p__Patescibacteria	c__Saccharimonadia	o__Saccharimonadales	f__unclassified_o__Saccharimonadales	g__unclassified_o__Saccharimonadales	s__unclassified_o__Saccharimonadales	OTU1601	0	1	0	0	0	0	0	0	0	0	0	0	0	0	0	0	0	0	0	0	1
d__Bacteria	k__norank_d__Bacteria	p__Zixibacteria	c__norank_p__Zixibacteria	o__norank_c__norank_p__Zixibacteria	f__norank_o__norank_c__norank_p__Zixibacteria	g__norank_f__norank_o__norank_c__norank_p__Zixibacteria	s__unclassified_g__norank_f__norank_o__norank_c__norank_p__Zixibacteria	OTU3922	0	0	2	0	1	0	4	1	2	0	0	0	0	0	0	0	0	0	0	0	10
d__Bacteria	k__norank_d__Bacteria	p__Acidobacteriota	c__Blastocatellia	o__11-24	f__norank_o__11-24	g__norank_f__norank_o__11-24	s__uncultured_bacterium_g__norank_f__norank_o__11-24	OTU673	1	2	1	0	0	0	0	1	0	0	0	0	1	0	0	0	0	0	0	0	6
d__Bacteria	k__norank_d__Bacteria	p__Acidobacteriota	c__Blastocatellia	o__Blastocatellales	f__Blastocatellaceae	g__JGI_0001001-H03	s__uncultured_Acidobacterium_sp._g__JGI_0001001-H03	OTU2857	1	1	0	0	0	1	1	1	0	4	0	0	0	1	0	1	1	0	0	0	12
d__Bacteria	k__norank_d__Bacteria	p__Proteobacteria	c__Gammaproteobacteria	o__Methylococcales	f__Methylomonadaceae	g__norank_f__Methylomonadaceae	s__unclassified_g__norank_f__Methylomonadaceae	OTU8865	0	0	0	0	0	0	0	0	0	0	0	2	0	0	0	0	0	0	1	1	4
d__Bacteria	k__norank_d__Bacteria	p__Bacteroidota	c__Bacteroidia	o__Bacteroidales	f__unclassified_o__Bacteroidales	g__unclassified_o__Bacteroidales	s__unclassified_o__Bacteroidales	OTU5065	0	0	0	1	0	0	0	1	2	0	0	0	0	0	0	0	0	0	0	0	4
d__Bacteria	k__norank_d__Bacteria	p__Desulfobacterota	c__Syntrophia	o__Syntrophales	f__Syntrophaceae	g__Syntrophus	s__unclassified_g__Syntrophus	OTU6120	0	1	1	0	0	1	0	0	0	2	0	0	0	0	0	0	0	0	0	0	5
d__Bacteria	k__norank_d__Bacteria	p__Actinobacteriota	c__Thermoleophilia	o__Gaiellales	f__norank_o__Gaiellales	g__norank_f__norank_o__Gaiellales	s__unclassified_g__norank_f__norank_o__Gaiellales	OTU2941	0	0	0	0	1	1	1	0	0	0	0	0	0	0	0	0	0	0	0	0	3
d__Bacteria	k__norank_d__Bacteria	p__Actinobacteriota	c__Actinobacteria	o__Frankiales	f__Sporichthyaceae	g__hgcI_clade	s__uncultured_actinobacterium_g__hgcI_clade	OTU7110	1	0	0	0	0	0	0	0	0	0	55	35	36	35	51	8	16	5	8	4	254
d__Bacteria	k__norank_d__Bacteria	p__Proteobacteria	c__Gammaproteobacteria	o__Competibacterales	f__Competibacteraceae	g__Candidatus_Competibacter	s__uncultured_bacterium_g__Candidatus_Competibacter	OTU5092	2	7	6	8	1	0	7	6	15	7	1	0	0	0	0	0	0	0	0	0	60
d__Bacteria	k__norank_d__Bacteria	p__SAR324_cladeMarine_group_B	c__norank_p__SAR324_cladeMarine_group_B	o__norank_c__norank_p__SAR324_cladeMarine_group_B	f__norank_o__norank_c__norank_p__SAR324_cladeMarine_group_B	g__norank_f__norank_o__norank_c__norank_p__SAR324_cladeMarine_group_B	s__unclassified_g__norank_f__norank_o__norank_c__norank_p__SAR324_cladeMarine_group_B	OTU1941	1	0	0	1	2	0	3	1	0	0	0	0	0	0	0	0	0	0	0	0	8
d__Bacteria	k__norank_d__Bacteria	p__Cyanobacteria	c__Cyanobacteriia	o__Chloroplast	f__norank_o__Chloroplast	g__norank_f__norank_o__Chloroplast	s__unclassified_g__norank_f__norank_o__Chloroplast	OTU7506	0	0	0	0	0	0	0	0	0	0	1	0	0	2	0	7	1	0	0	0	11
d__Bacteria	k__norank_d__Bacteria	p__Chloroflexi	c__Anaerolineae	o__Anaerolineales	f__Anaerolineaceae	g__norank_f__Anaerolineaceae	s__unclassified_g__norank_f__Anaerolineaceae	OTU237	7	1	0	0	1	5	1	2	0	3	0	0	0	0	0	0	0	0	0	0	20
d__Bacteria	k__norank_d__Bacteria	p__Proteobacteria	c__Gammaproteobacteria	o__CHAB-XI-27	f__norank_o__CHAB-XI-27	g__norank_f__norank_o__CHAB-XI-27	s__uncultured_bacterium_g__norank_f__norank_o__CHAB-XI-27	OTU7925	0	0	0	0	0	0	0	0	0	0	0	0	0	0	0	3	3	0	2	3	11
d__Bacteria	k__norank_d__Bacteria	p__Chloroflexi	c__Chloroflexia	o__Chloroflexales	f__Roseiflexaceae	g__Kouleothrix	s__unclassified_g__Kouleothrix	OTU3777	1	0	1	0	0	0	1	0	0	0	0	0	0	0	0	0	0	0	0	0	3
d__Bacteria	k__norank_d__Bacteria	p__Chloroflexi	c__Anaerolineae	o__Anaerolineales	f__Anaerolineaceae	g__norank_f__Anaerolineaceae	s__uncultured_Anaerolineaceae_bacterium_g__norank_f__Anaerolineaceae	OTU2443	12	0	2	1	1	14	2	0	0	1	0	0	0	0	0	0	0	0	0	0	33
d__Bacteria	k__norank_d__Bacteria	p__Chloroflexi	c__Anaerolineae	o__ADurb.Bin180	f__norank_o__ADurb.Bin180	g__norank_f__norank_o__ADurb.Bin180	s__unclassified_g__norank_f__norank_o__ADurb.Bin180	OTU1115	0	0	2	0	1	0	0	0	4	0	0	0	0	0	0	0	0	0	0	0	7
d__Bacteria	k__norank_d__Bacteria	p__Proteobacteria	c__Gammaproteobacteria	o__Xanthomonadales	f__norank_o__Xanthomonadales	g__norank_f__norank_o__Xanthomonadales	s__unclassified_g__norank_f__norank_o__Xanthomonadales	OTU50	5	0	1	1	0	0	0	6	0	0	0	1	0	0	0	1	2	1	3	0	21
d__Bacteria	k__norank_d__Bacteria	p__Bacteroidota	c__Bacteroidia	o__Flavobacteriales	f__Crocinitomicaceae	g__Fluviicola	s__uncultured_bacterium_g__Fluviicola	OTU7537	0	0	0	0	0	0	0	0	0	0	3	2	1	0	0	0	0	0	0	0	6
d__Bacteria	k__norank_d__Bacteria	p__Dependentiae	c__Babeliae	o__Babeliales	f__unclassified_o__Babeliales	g__unclassified_o__Babeliales	s__unclassified_o__Babeliales	OTU2947	0	0	0	0	0	2	0	0	0	0	0	0	0	0	0	0	0	0	0	0	2
d__Bacteria	k__norank_d__Bacteria	p__Proteobacteria	c__Gammaproteobacteria	o__Burkholderiales	f__TRA3-20	g__norank_f__TRA3-20	s__unclassified_g__norank_f__TRA3-20	OTU6263	3	3	1	1	1	0	0	2	1	2	0	1	0	0	0	0	0	0	0	0	15
d__Bacteria	k__norank_d__Bacteria	p__Actinobacteriota	c__Acidimicrobiia	o__Microtrichales	f__Microtrichaceae	g__IMCC26207	s__uncultured_bacterium_g__IMCC26207	OTU8311	0	0	0	1	0	0	1	0	0	1	8	6	1	4	0	0	0	0	1	0	23
d__Bacteria	k__norank_d__Bacteria	p__Myxococcota	c__Polyangia	o__Polyangiales	f__Phaselicystidaceae	g__Phaselicystis	s__unclassified_g__Phaselicystis	OTU3651	0	0	0	0	0	0	2	0	0	0	0	0	0	0	0	0	0	0	0	0	2
d__Bacteria	k__norank_d__Bacteria	p__Proteobacteria	c__Gammaproteobacteria	o__Burkholderiales	f__Rhodocyclaceae	g__Azospira	s__Azospira_oryzae	OTU8275	2	0	11	2	0	0	0	1	0	2	0	1	1	1	2	1	3	2	2	6	37
d__Bacteria	k__norank_d__Bacteria	p__Proteobacteria	c__Alphaproteobacteria	o__Acetobacterales	f__Acetobacteraceae	g__Craurococcus-Caldovatus	s__uncultured_bacterium_g__Craurococcus-Caldovatus	OTU1054	4	8	17	3	3	6	5	4	0	1	0	1	0	0	0	0	1	0	1	0	54
d__Bacteria	k__norank_d__Bacteria	p__Firmicutes	c__Clostridia	o__Oscillospirales	f__UCG-010	g__norank_f__UCG-010	s__uncultured_eubacterium_WCHB1-54	OTU1450	0	14	3	8	3	0	2	0	0	0	0	0	0	0	0	0	0	0	0	0	30
d__Bacteria	k__norank_d__Bacteria	p__Actinobacteriota	c__Actinobacteria	o__Micromonosporales	f__Micromonosporaceae	g__unclassified_f__Micromonosporaceae	s__unclassified_f__Micromonosporaceae	OTU1519	11	8	3	6	9	23	18	4	12	5	1	0	0	2	1	0	0	0	0	1	104
d__Bacteria	k__norank_d__Bacteria	p__Bacteroidota	c__Bacteroidia	o__Chitinophagales	f__unclassified_o__Chitinophagales	g__unclassified_o__Chitinophagales	s__unclassified_o__Chitinophagales	OTU8741	0	1	0	0	0	0	0	0	0	1	0	0	1	0	0	0	0	0	0	1	4
d__Bacteria	k__norank_d__Bacteria	p__Firmicutes	c__Clostridia	o__norank_c__Clostridia	f__Hungateiclostridiaceae	g__Ruminiclostridium	s__unclassified_g__Ruminiclostridium	OTU5376	0	7	1	0	0	1	1	0	13	1	0	0	0	0	0	0	0	0	0	0	24
d__Bacteria	k__norank_d__Bacteria	p__Bacteroidota	c__Ignavibacteria	o__Ignavibacteriales	f__unclassified_o__Ignavibacteriales	g__unclassified_o__Ignavibacteriales	s__unclassified_o__Ignavibacteriales	OTU5927	0	0	1	0	0	2	0	1	0	4	0	0	0	0	0	0	0	0	0	0	8
d__Bacteria	k__norank_d__Bacteria	p__Chloroflexi	c__SHA-26	o__norank_c__SHA-26	f__norank_o__norank_c__SHA-26	g__norank_f__norank_o__norank_c__SHA-26	s__uncultured_soil_bacterium_g__norank_f__norank_o__norank_c__SHA-26	OTU926	0	1	0	1	0	0	1	0	0	0	0	0	0	0	0	0	0	0	0	0	3
d__Bacteria	k__norank_d__Bacteria	p__Cyanobacteria	c__Cyanobacteriia	o__Chloroplast	f__norank_o__Chloroplast	g__norank_f__norank_o__Chloroplast	s__Tetrabaena_socialis	OTU7672	0	0	0	0	0	0	0	0	0	0	0	0	0	0	0	0	0	1	0	0	1
d__Bacteria	k__norank_d__Bacteria	p__Chloroflexi	c__Anaerolineae	o__ADurb.Bin180	f__norank_o__ADurb.Bin180	g__norank_f__norank_o__ADurb.Bin180	s__uncultured_bacterium_g__norank_f__norank_o__ADurb.Bin180	OTU5216	0	1	0	0	1	0	0	0	3	0	0	0	0	0	0	0	0	0	0	0	5
d__Bacteria	k__norank_d__Bacteria	p__unclassified_k__norank_d__Bacteria	c__unclassified_k__norank_d__Bacteria	o__unclassified_k__norank_d__Bacteria	f__unclassified_k__norank_d__Bacteria	g__unclassified_k__norank_d__Bacteria	s__unclassified_k__norank_d__Bacteria	OTU1397	0	0	0	1	0	0	0	1	0	0	0	0	0	0	0	0	0	0	0	0	2
d__Bacteria	k__norank_d__Bacteria	p__Thermotogota	c__Thermotogae	o__Kosmotogales	f__Kosmotogaceae	g__Mesotoga	s__uncultured_bacterium_g__Mesotoga	OTU3480	0	0	0	2	0	0	3	0	6	0	0	0	0	0	0	0	0	0	0	0	11
d__Bacteria	k__norank_d__Bacteria	p__Latescibacterota	c__norank_p__Latescibacterota	o__norank_c__norank_p__Latescibacterota	f__norank_o__norank_c__norank_p__Latescibacterota	g__norank_f__norank_o__norank_c__norank_p__Latescibacterota	s__uncultured_Fibrobacteres_bacterium_g__norank	OTU5798	0	0	0	0	0	1	0	0	0	1	0	0	0	0	0	0	0	0	0	0	2
d__Bacteria	k__norank_d__Bacteria	p__Proteobacteria	c__Gammaproteobacteria	o__Burkholderiales	f__Sutterellaceae	g__norank_f__Sutterellaceae	s__uncultured_bacterium_g__norank_f__Sutterellaceae	OTU4260	0	0	0	1	1	3	4	1	0	1	0	0	0	0	0	0	1	0	0	0	12
d__Bacteria	k__norank_d__Bacteria	p__Fusobacteriota	c__Fusobacteriia	o__Fusobacteriales	f__Fusobacteriaceae	g__Fusobacterium	s__Fusobacterium_periodonticum	OTU2074	0	0	0	0	2	0	0	0	0	0	0	0	0	0	0	0	0	0	0	0	2
d__Bacteria	k__norank_d__Bacteria	p__Chloroflexi	c__KD4-96	o__norank_c__KD4-96	f__norank_o__norank_c__KD4-96	g__norank_f__norank_o__norank_c__KD4-96	s__uncultured_Chloroflexi_bacterium_g__norank_f__norank_o__norank_c__KD4-96	OTU5474	0	2	0	0	1	0	3	3	8	3	0	0	0	0	0	0	0	0	0	0	20
d__Bacteria	k__norank_d__Bacteria	p__Fibrobacterota	c__Fibrobacteria	o__Fibrobacterales	f__Fibrobacteraceae	g__Fibrobacter	s__metagenome_g__Fibrobacter	OTU7444	0	0	0	0	0	0	0	0	0	0	0	0	0	3	0	1	0	0	0	0	4
d__Bacteria	k__norank_d__Bacteria	p__Firmicutes	c__Clostridia	o__Peptococcales	f__Peptococcaceae	g__norank_f__Peptococcaceae	s__uncultured_soil_bacterium_g__norank_f__Peptococcaceae	OTU1683	0	3	1	2	1	1	3	1	2	0	0	0	0	0	0	0	0	0	0	0	14
d__Bacteria	k__norank_d__Bacteria	p__Chloroflexi	c__Chloroflexia	o__Thermomicrobiales	f__JG30-KF-CM45	g__norank_f__JG30-KF-CM45	s__uncultured_Chloroflexi_bacterium_g__norank_f__JG30-KF-CM45	OTU5472	0	0	0	0	0	0	0	0	0	0	0	0	0	0	0	0	1	0	0	0	1
d__Bacteria	k__norank_d__Bacteria	p__Acidobacteriota	c__Vicinamibacteria	o__Vicinamibacterales	f__norank_o__Vicinamibacterales	g__norank_f__norank_o__Vicinamibacterales	s__unclassified_g__norank_f__norank_o__Vicinamibacterales	OTU3901	9	2	0	1	5	11	4	3	0	1	0	0	0	0	0	0	0	0	0	0	36
d__Bacteria	k__norank_d__Bacteria	p__Bacteroidota	c__Bacteroidia	o__unclassified_c__Bacteroidia	f__unclassified_c__Bacteroidia	g__unclassified_c__Bacteroidia	s__unclassified_c__Bacteroidia	OTU7972	0	1	0	0	0	0	0	0	0	0	0	0	0	0	0	0	0	0	0	0	1
d__Bacteria	k__norank_d__Bacteria	p__Desulfobacterota	c__Desulfovibrionia	o__Desulfovibrionales	f__Desulfomicrobiaceae	g__Desulfomicrobium	s__uncultured_bacterium_g__Desulfomicrobium	OTU9035	4	48	31	72	4	1	19	8	5	61	5	7	3	9	5	8	3	9	28	10	340
d__Bacteria	k__norank_d__Bacteria	p__Proteobacteria	c__Gammaproteobacteria	o__Burkholderiales	f__Rhodocyclaceae	g__Denitratisoma	s__uncultured_bacterium_g__Denitratisoma	OTU4941	1	0	8	11	5	0	0	3	0	0	0	0	0	0	0	0	0	1	0	0	29
d__Bacteria	k__norank_d__Bacteria	p__Proteobacteria	c__Alphaproteobacteria	o__Rhizobiales	f__unclassified_o__Rhizobiales	g__unclassified_o__Rhizobiales	s__unclassified_o__Rhizobiales	OTU7973	0	1	0	1	0	0	0	0	0	0	0	0	0	0	0	0	0	0	0	0	2
d__Bacteria	k__norank_d__Bacteria	p__Proteobacteria	c__Gammaproteobacteria	o__Pseudomonadales	f__Moraxellaceae	g__norank_f__Moraxellaceae	s__unclassified_g__norank_f__Moraxellaceae	OTU1123	1	3	1	1	0	0	0	1	0	0	0	0	0	0	0	0	0	0	0	0	7
d__Bacteria	k__norank_d__Bacteria	p__Bacteroidota	c__Bacteroidia	o__Bacteroidales	f__Paludibacteraceae	g__norank_f__Paludibacteraceae	s__uncultured_soil_bacterium_g__norank_f__Paludibacteraceae	OTU491	0	1	0	0	1	0	0	0	0	0	0	0	0	0	0	0	0	0	0	0	2
d__Bacteria	k__norank_d__Bacteria	p__Armatimonadota	c__Fimbriimonadia	o__Fimbriimonadales	f__Fimbriimonadaceae	g__norank_f__Fimbriimonadaceae	s__uncultured_bacterium_g__norank_f__Fimbriimonadaceae	OTU3343	0	0	1	0	0	0	0	1	0	0	0	0	0	0	0	0	0	0	0	0	2
d__Bacteria	k__norank_d__Bacteria	p__Chloroflexi	c__Anaerolineae	o__SJA-15	f__norank_o__SJA-15	g__norank_f__norank_o__SJA-15	s__unclassified_g__norank_f__norank_o__SJA-15	OTU8734	0	2	2	1	1	0	1	1	5	0	0	0	0	0	0	0	0	0	0	0	13
d__Bacteria	k__norank_d__Bacteria	p__Bacteroidota	c__Bacteroidia	o__Bacteroidales	f__Prevotellaceae	g__Prevotella	s__uncultured_bacterium_g__Prevotella	OTU8072	0	0	0	0	0	0	0	0	0	0	0	3	2	6	2	4	4	2	0	0	23
d__Bacteria	k__norank_d__Bacteria	p__Dependentiae	c__Babeliae	o__Babeliales	f__Babeliaceae	g__norank_f__Babeliaceae	s__unclassified_g__norank_f__Babeliaceae	OTU2925	0	0	0	1	0	2	0	0	0	0	0	0	0	0	0	0	0	0	0	0	3
d__Bacteria	k__norank_d__Bacteria	p__Desulfobacterota	c__Desulfobulbia	o__Desulfobulbales	f__Desulfocapsaceae	g__norank_f__Desulfocapsaceae	s__uncultured_bacterium_g__norank_f__Desulfocapsaceae	OTU6259	1	0	6	4	0	3	1	2	0	0	1	0	0	0	0	0	0	0	0	0	18
d__Bacteria	k__norank_d__Bacteria	p__Fusobacteriota	c__Fusobacteriia	o__Fusobacteriales	f__Fusobacteriaceae	g__Cetobacterium	s__uncultured_Fusobacteriales_bacterium_g__Cetobacterium	OTU6894	0	0	0	0	0	0	0	0	0	0	3	1	1	2	1	0	0	1	0	0	9
d__Bacteria	k__norank_d__Bacteria	p__Desulfobacterota	c__Desulfobulbia	o__Desulfobulbales	f__Desulfurivibrionaceae	g__MSBL7	s__bioreactor_metagenome_g__MSBL7	OTU5961	0	2	0	0	0	0	0	0	0	0	0	0	0	0	0	0	0	0	1	0	3
d__Bacteria	k__norank_d__Bacteria	p__Cyanobacteria	c__Cyanobacteriia	o__Cyanobacteriales	f__Chroococcidiopsaceae	g__norank_f__Chroococcidiopsaceae	s__uncultured_cyanobacterium_g__norank_f__Chroococcidiopsaceae	OTU7220	0	0	0	0	0	0	0	0	0	0	0	0	0	7	0	0	0	0	0	0	7
d__Bacteria	k__norank_d__Bacteria	p__Firmicutes	c__Clostridia	o__Oscillospirales	f__Ruminococcaceae	g__norank_f__Ruminococcaceae	s__unclassified_g__norank_f__Ruminococcaceae	OTU1041	0	0	1	0	0	0	0	0	0	0	0	0	0	0	0	0	0	0	1	0	2
d__Bacteria	k__norank_d__Bacteria	p__Desulfobacterota	c__Desulfuromonadia	o__norank_c__Desulfuromonadia	f__Geothermobacteraceae	g__Geothermobacter	s__unclassified_g__Geothermobacter	OTU3870	4	14	2	15	4	4	28	5	1	15	5	3	4	4	1	1	7	0	5	0	122
d__Bacteria	k__norank_d__Bacteria	p__Methylomirabilota	c__Methylomirabilia	o__Rokubacteriales	f__norank_o__Rokubacteriales	g__norank_f__norank_o__Rokubacteriales	s__unclassified_g__norank_f__norank_o__Rokubacteriales	OTU2381	0	0	1	0	0	2	0	0	0	0	0	0	0	0	0	0	0	0	0	0	3
d__Bacteria	k__norank_d__Bacteria	p__Myxococcota	c__Polyangia	o__Polyangiales	f__Sandaracinaceae	g__norank_f__Sandaracinaceae	s__uncultured_bacterium_g__norank_f__Sandaracinaceae	OTU2470	1	0	0	0	0	5	0	0	0	0	0	0	0	0	0	0	0	0	0	0	6
d__Bacteria	k__norank_d__Bacteria	p__Chloroflexi	c__Chloroflexia	o__Chloroflexales	f__Roseiflexaceae	g__norank_f__Roseiflexaceae	s__unclassified_g__norank_f__Roseiflexaceae	OTU7282	0	0	0	0	0	0	0	0	0	0	0	0	0	3	0	0	0	0	0	0	3
d__Bacteria	k__norank_d__Bacteria	p__Myxococcota	c__Polyangia	o__Polyangiales	f__Sandaracinaceae	g__norank_f__Sandaracinaceae	s__uncultured_bacterium_g__norank_f__Sandaracinaceae	OTU2472	9	4	1	1	0	0	0	1	0	0	0	0	0	0	0	0	0	0	0	0	16
d__Bacteria	k__norank_d__Bacteria	p__Proteobacteria	c__Alphaproteobacteria	o__Rickettsiales	f__Mitochondria	g__norank_f__Mitochondria	s__unclassified_g__norank_f__Mitochondria	OTU6871	0	0	0	0	0	0	0	0	0	0	0	1	0	0	0	0	0	0	0	0	1
d__Bacteria	k__norank_d__Bacteria	p__Gemmatimonadota	c__Gemmatimonadetes	o__Gemmatimonadales	f__Gemmatimonadaceae	g__Gemmatimonas	s__unclassified_g__Gemmatimonas	OTU1868	2	0	0	0	1	4	1	0	0	1	0	0	0	0	0	0	0	0	0	0	9
d__Bacteria	k__norank_d__Bacteria	p__Bdellovibrionota	c__Bdellovibrionia	o__Bacteriovoracales	f__Bacteriovoracaceae	g__Peredibacter	s__uncultured_bacterium_g__Peredibacter	OTU4731	3	0	0	0	0	0	0	1	0	1	1	0	0	0	0	0	0	0	2	1	9
d__Bacteria	k__norank_d__Bacteria	p__Firmicutes	c__Clostridia	o__Clostridiales	f__Clostridiaceae	g__Clostridium_sensu_stricto_12	s__uncultured_bacterium_g__Clostridium_sensu_stricto_12	OTU2611	1	0	0	0	0	2	0	1	0	0	0	0	0	0	0	0	0	0	0	0	4
d__Bacteria	k__norank_d__Bacteria	p__Patescibacteria	c__ABY1	o__Candidatus_Falkowbacteria	f__norank_o__Candidatus_Falkowbacteria	g__norank_f__norank_o__Candidatus_Falkowbacteria	s__unclassified_g__norank_f__norank_o__Candidatus_Falkowbacteria	OTU8602	0	0	0	0	1	0	0	0	0	0	0	0	0	0	0	0	0	0	0	0	1
d__Bacteria	k__norank_d__Bacteria	p__Actinobacteriota	c__Acidimicrobiia	o__IMCC26256	f__norank_o__IMCC26256	g__norank_f__norank_o__IMCC26256	s__unclassified_g__norank_f__norank_o__IMCC26256	OTU1309	20	11	6	9	4	26	14	16	2	7	0	0	0	1	0	0	0	0	0	0	116
d__Bacteria	k__norank_d__Bacteria	p__Patescibacteria	c__Parcubacteria	o__Candidatus_Liptonbacteria	f__norank_o__Candidatus_Liptonbacteria	g__norank_f__norank_o__Candidatus_Liptonbacteria	s__unclassified_g__norank_f__norank_o__Candidatus_Liptonbacteria	OTU8366	0	0	0	0	0	0	0	0	0	0	0	0	0	0	0	0	0	0	1	0	1
d__Bacteria	k__norank_d__Bacteria	p__Desulfobacterota	c__Syntrophorhabdia	o__Syntrophorhabdales	f__Syntrophorhabdaceae	g__Syntrophorhabdus	s__uncultured_bacterium_g__Syntrophorhabdus	OTU4577	0	3	2	4	4	2	7	3	34	5	0	0	0	0	0	0	0	0	0	0	64
d__Bacteria	k__norank_d__Bacteria	p__Acidobacteriota	c__Thermoanaerobaculia	o__Thermoanaerobaculales	f__Thermoanaerobaculaceae	g__Subgroup_10	s__unclassified_g__Subgroup_10	OTU2603	5	0	0	0	4	4	0	0	0	0	0	0	0	0	0	0	0	0	0	0	13
d__Bacteria	k__norank_d__Bacteria	p__Bdellovibrionota	c__Bdellovibrionia	o__Bdellovibrionales	f__Bdellovibrionaceae	g__Bdellovibrio	s__uncultured_bacterium_g__Bdellovibrio	OTU1428	0	0	1	1	0	0	0	0	0	0	0	0	0	0	0	0	0	0	0	0	2
d__Bacteria	k__norank_d__Bacteria	p__Proteobacteria	c__Gammaproteobacteria	o__Burkholderiales	f__Comamonadaceae	g__unclassified_f__Comamonadaceae	s__unclassified_f__Comamonadaceae	OTU8280	0	0	0	0	0	0	0	0	0	0	0	2	0	0	0	7	1	3	1	0	14
d__Bacteria	k__norank_d__Bacteria	p__Proteobacteria	c__Gammaproteobacteria	o__Methylococcales	f__Methylomonadaceae	g__Crenothrix	s__uncultured_Crenothrix_sp._g__Crenothrix	OTU1846	2	1	1	1	8	0	0	0	0	0	0	0	0	0	0	0	0	0	0	0	13
d__Bacteria	k__norank_d__Bacteria	p__Armatimonadota	c__DG-56	o__norank_c__DG-56	f__norank_o__norank_c__DG-56	g__norank_f__norank_o__norank_c__DG-56	s__uncultured_soil_bacterium_g__norank_f__norank_o__norank_c__DG-56	OTU1865	0	0	0	0	2	0	2	1	6	0	0	0	0	0	0	0	0	0	0	1	12
d__Bacteria	k__norank_d__Bacteria	p__Proteobacteria	c__Alphaproteobacteria	o__Rhodobacterales	f__Rhodobacteraceae	g__unclassified_f__Rhodobacteraceae	s__unclassified_f__Rhodobacteraceae	OTU1244	1	2	4	4	1	5	2	0	0	2	0	0	0	0	0	0	0	1	0	0	22
d__Bacteria	k__norank_d__Bacteria	p__Proteobacteria	c__Gammaproteobacteria	o__Diplorickettsiales	f__Diplorickettsiaceae	g__norank_f__Diplorickettsiaceae	s__unclassified_g__norank_f__Diplorickettsiaceae	OTU1786	0	0	0	0	1	0	0	0	0	0	0	0	0	0	0	0	0	0	0	0	1
d__Bacteria	k__norank_d__Bacteria	p__Gemmatimonadota	c__Gemmatimonadetes	o__Gemmatimonadales	f__Gemmatimonadaceae	g__Roseisolibacter	s__uncultured_bacterium_g__Roseisolibacter	OTU2891	1	0	0	1	0	5	0	0	0	0	0	0	0	1	0	0	0	0	0	0	8
d__Bacteria	k__norank_d__Bacteria	p__Nitrospinota	c__P9X2b3D02	o__norank_c__P9X2b3D02	f__norank_o__norank_c__P9X2b3D02	g__norank_f__norank_o__norank_c__P9X2b3D02	s__uncultured_prokaryote_g__norank_f__norank_o__norank_c__P9X2b3D02	OTU2689	16	31	23	11	28	8	21	7	3	17	1	0	0	0	0	0	0	0	0	0	166
d__Bacteria	k__norank_d__Bacteria	p__unclassified_k__norank_d__Bacteria	c__unclassified_k__norank_d__Bacteria	o__unclassified_k__norank_d__Bacteria	f__unclassified_k__norank_d__Bacteria	g__unclassified_k__norank_d__Bacteria	s__unclassified_k__norank_d__Bacteria	OTU3061	0	0	0	0	0	3	0	0	0	0	0	0	0	0	0	0	0	0	0	0	3
d__Bacteria	k__norank_d__Bacteria	p__unclassified_k__norank_d__Bacteria	c__unclassified_k__norank_d__Bacteria	o__unclassified_k__norank_d__Bacteria	f__unclassified_k__norank_d__Bacteria	g__unclassified_k__norank_d__Bacteria	s__unclassified_k__norank_d__Bacteria	OTU6013	0	2	0	0	0	0	0	0	0	1	0	0	0	0	0	0	0	0	0	0	3
d__Bacteria	k__norank_d__Bacteria	p__Desulfobacterota	c__Desulfobacteria	o__Desulfatiglandales	f__Desulfatiglandaceae	g__Desulfatiglans	s__uncultured_bacterium_g__Desulfatiglans	OTU1326	0	1	1	0	0	0	3	1	1	0	0	0	0	0	0	0	0	0	0	0	7
d__Bacteria	k__norank_d__Bacteria	p__Acidobacteriota	c__Thermoanaerobaculia	o__Thermoanaerobaculales	f__Thermoanaerobaculaceae	g__Subgroup_10	s__metagenome_g__Subgroup_10	OTU6165	2	7	3	12	4	1	7	13	0	9	0	1	0	0	0	0	0	0	0	0	59
d__Bacteria	k__norank_d__Bacteria	p__Patescibacteria	c__Dojkabacteria	o__norank_c__Dojkabacteria	f__norank_o__norank_c__Dojkabacteria	g__norank_f__norank_o__norank_c__Dojkabacteria	s__uncultured_eubacterium_WCHB1-01	OTU7469	1	4	4	6	0	0	1	0	0	0	2	0	1	2	2	0	1	0	0	0	24
d__Bacteria	k__norank_d__Bacteria	p__Latescibacterota	c__norank_p__Latescibacterota	o__norank_c__norank_p__Latescibacterota	f__norank_o__norank_c__norank_p__Latescibacterota	g__norank_f__norank_o__norank_c__norank_p__Latescibacterota	s__uncultured_planctomycete_g__norank_f__norank_o__norank_c__norank	OTU6278	0	3	1	0	0	0	1	3	0	3	0	0	0	0	0	0	0	0	0	0	11
d__Bacteria	k__norank_d__Bacteria	p__Proteobacteria	c__Gammaproteobacteria	o__Burkholderiales	f__Chitinibacteraceae	g__Chitinilyticum	s__Chitinilyticum_aquatile	OTU5947	0	0	0	0	0	0	0	0	0	0	0	0	0	0	0	0	0	2	1	1	4
d__Bacteria	k__norank_d__Bacteria	p__Chloroflexi	c__Anaerolineae	o__SBR1031	f__A4b	g__norank_f__A4b	s__unclassified_g__norank_f__A4b	OTU4145	6	1	8	0	4	2	5	3	0	0	0	0	0	0	0	0	1	0	0	0	30
d__Bacteria	k__norank_d__Bacteria	p__Bacteroidota	c__Bacteroidia	o__Chitinophagales	f__norank_o__Chitinophagales	g__norank_f__norank_o__Chitinophagales	s__unclassified_g__norank_f__norank_o__Chitinophagales	OTU8041	0	0	0	0	0	0	0	0	0	0	2	1	1	0	1	1	0	1	0	1	8
d__Bacteria	k__norank_d__Bacteria	p__Chloroflexi	c__Anaerolineae	o__RBG-13-54-9	f__norank_o__RBG-13-54-9	g__norank_f__norank_o__RBG-13-54-9	s__metagenome_g__norank_f__norank_o__RBG-13-54-9	OTU1142	16	4	15	3	1	0	0	3	0	0	1	2	2	2	1	0	0	0	0	0	50
d__Bacteria	k__norank_d__Bacteria	p__Chloroflexi	c__Anaerolineae	o__RBG-13-54-9	f__norank_o__RBG-13-54-9	g__norank_f__norank_o__RBG-13-54-9	s__metagenome_g__norank_f__norank_o__RBG-13-54-9	OTU1141	3	0	8	3	0	0	0	0	0	1	0	0	0	1	0	0	0	0	0	0	16
d__Bacteria	k__norank_d__Bacteria	p__Actinobacteriota	c__Actinobacteria	o__Frankiales	f__Sporichthyaceae	g__norank_f__Sporichthyaceae	s__uncultured_bacterium_g__norank_f__Sporichthyaceae	OTU858	11	5	4	4	2	17	4	2	1	4	0	0	0	0	0	0	1	0	0	1	56
d__Bacteria	k__norank_d__Bacteria	p__Patescibacteria	c__Saccharimonadia	o__Saccharimonadales	f__norank_o__Saccharimonadales	g__norank_f__norank_o__Saccharimonadales	s__uncultured_bacterium_g__norank_f__norank_o__Saccharimonadales	OTU1093	2	15	6	7	3	0	0	0	0	0	1	0	1	1	1	0	0	0	0	0	37
d__Bacteria	k__norank_d__Bacteria	p__Myxococcota	c__Polyangia	o__Haliangiales	f__Haliangiaceae	g__Haliangium	s__unclassified_g__Haliangium	OTU6099	60	7	65	13	24	34	10	44	7	5	0	0	0	1	0	0	1	0	0	0	271
d__Bacteria	k__norank_d__Bacteria	p__Patescibacteria	c__Saccharimonadia	o__Saccharimonadales	f__Saccharimonadaceae	g__TM7a	s__uncultured_bacterium_g__TM7a	OTU1710	4	12	9	4	0	0	3	0	1	0	4	2	1	2	0	1	1	2	2	1	49
d__Bacteria	k__norank_d__Bacteria	p__Patescibacteria	c__Saccharimonadia	o__Saccharimonadales	f__norank_o__Saccharimonadales	g__norank_f__norank_o__Saccharimonadales	s__uncultured_bacterium_g__norank_f__norank_o__Saccharimonadales	OTU1098	13	36	15	20	5	1	4	3	4	8	1	1	1	1	1	1	0	1	0	1	117
d__Bacteria	k__norank_d__Bacteria	p__Schekmanbacteria	c__norank_p__Schekmanbacteria	o__norank_c__norank_p__Schekmanbacteria	f__norank_o__norank_c__norank_p__Schekmanbacteria	g__norank_f__norank_o__norank_c__norank_p__Schekmanbacteria	s__Candidatus_Schekmanbacteria_bacterium_RIFCSPLOWO2_02_FULL_38_14	OTU2636	0	0	0	0	0	2	0	0	0	0	0	0	0	0	0	0	0	0	0	0	2
d__Bacteria	k__norank_d__Bacteria	p__Chloroflexi	c__JG30-KF-CM66	o__norank_c__JG30-KF-CM66	f__norank_o__norank_c__JG30-KF-CM66	g__norank_f__norank_o__norank_c__JG30-KF-CM66	s__unclassified_g__norank_f__norank_o__norank_c__JG30-KF-CM66	OTU2109	0	0	0	0	2	0	0	1	0	0	0	0	0	0	0	0	0	0	0	0	3
d__Bacteria	k__norank_d__Bacteria	p__Acidobacteriota	c__Vicinamibacteria	o__Subgroup_17	f__norank_o__Subgroup_17	g__norank_f__norank_o__Subgroup_17	s__unclassified_g__norank_f__norank_o__Subgroup_17	OTU4504	0	4	1	0	1	0	2	3	2	2	0	0	1	0	0	0	0	0	0	0	16
d__Bacteria	k__norank_d__Bacteria	p__Hydrogenedentes	c__Hydrogenedentia	o__Hydrogenedentiales	f__Hydrogenedensaceae	g__norank_f__Hydrogenedensaceae	s__uncultured_bacterium_g__norank_f__Hydrogenedensaceae	OTU1630	0	0	1	1	0	0	0	0	0	0	0	0	0	0	0	1	0	0	0	1	4
d__Bacteria	k__norank_d__Bacteria	p__GAL15	c__norank_p__GAL15	o__norank_c__norank_p__GAL15	f__norank_o__norank_c__norank_p__GAL15	g__norank_f__norank_o__norank_c__norank_p__GAL15	s__uncultured_bacterium_g__norank_f__norank_o__norank_c__norank_p__GAL15	OTU2614	0	0	0	0	2	12	1	0	0	1	0	0	0	0	0	0	0	0	0	0	16
d__Bacteria	k__norank_d__Bacteria	p__Chloroflexi	c__Anaerolineae	o__SJA-15	f__norank_o__SJA-15	g__norank_f__norank_o__SJA-15	s__unclassified_g__norank_f__norank_o__SJA-15	OTU3222	0	0	0	0	0	7	0	0	0	0	0	0	0	0	0	0	0	0	0	0	7
d__Bacteria	k__norank_d__Bacteria	p__Spirochaetota	c__Spirochaetia	o__Spirochaetales	f__Spirochaetaceae	g__GWE2-31-10	s__uncultured_bacterium_g__GWE2-31-10	OTU1166	0	0	1	1	0	0	0	0	0	0	0	0	0	1	0	0	0	0	0	0	3
d__Bacteria	k__norank_d__Bacteria	p__Cyanobacteria	c__Vampirivibrionia	o__Caenarcaniphilales	f__norank_o__Caenarcaniphilales	g__norank_f__norank_o__Caenarcaniphilales	s__uncultured_cyanobacterium_g__norank_f__norank_o__Caenarcaniphilales	OTU7371	0	0	0	0	0	0	0	0	0	0	1	4	0	0	1	0	0	0	0	0	6
d__Bacteria	k__norank_d__Bacteria	p__Chloroflexi	c__Anaerolineae	o__Anaerolineales	f__Anaerolineaceae	g__norank_f__Anaerolineaceae	s__unclassified_g__norank_f__Anaerolineaceae	OTU4046	7	8	10	7	1	5	15	5	26	15	1	1	0	1	0	0	0	0	0	0	102
d__Bacteria	k__norank_d__Bacteria	p__Acidobacteriota	c__Subgroup_18	o__norank_c__Subgroup_18	f__norank_o__norank_c__Subgroup_18	g__norank_f__norank_o__norank_c__Subgroup_18	s__unclassified_g__norank_f__norank_o__norank_c__Subgroup_18	OTU4032	2	4	5	2	0	13	14	7	73	9	0	0	0	0	0	0	0	0	0	0	129
d__Bacteria	k__norank_d__Bacteria	p__Firmicutes	c__Negativicutes	o__Acidaminococcales	f__Acidaminococcaceae	g__norank_f__Acidaminococcaceae	s__uncultured_bacterium_g__norank_f__Acidaminococcaceae	OTU7859	0	1	6	0	1	11	0	0	0	0	0	7	7	3	4	0	1	3	1	2	47
d__Bacteria	k__norank_d__Bacteria	p__Actinobacteriota	c__Thermoleophilia	o__Solirubrobacterales	f__67-14	g__norank_f__67-14	s__uncultured_bacterium_g__norank_f__67-14	OTU5120	4	1	2	1	1	10	1	3	1	1	1	2	0	0	0	0	0	0	0	0	28
d__Bacteria	k__norank_d__Bacteria	p__Acidobacteriota	c__Vicinamibacteria	o__Vicinamibacterales	f__norank_o__Vicinamibacterales	g__norank_f__norank_o__Vicinamibacterales	s__uncultured_bacterium_g__norank_f__norank_o__Vicinamibacterales	OTU4024	1	6	3	1	4	15	16	10	12	24	0	0	0	1	0	0	0	0	0	0	93
d__Bacteria	k__norank_d__Bacteria	p__Verrucomicrobiota	c__Verrucomicrobiae	o__Pedosphaerales	f__Pedosphaeraceae	g__ADurb.Bin063-1	s__unclassified_g__ADurb.Bin063-1	OTU969	5	7	3	2	1	1	5	0	0	0	1	2	1	0	1	0	0	0	0	0	29
d__Bacteria	k__norank_d__Bacteria	p__WPS-2	c__norank_p__WPS-2	o__norank_c__norank_p__WPS-2	f__norank_o__norank_c__norank_p__WPS-2	g__norank_f__norank_o__norank_c__norank_p__WPS-2	s__bacterium_ADurb.Bin236	OTU6288	0	0	0	0	0	0	0	0	0	1	0	0	0	0	0	0	0	0	0	0	1
d__Bacteria	k__norank_d__Bacteria	p__Chloroflexi	c__Anaerolineae	o__Caldilineales	f__Caldilineaceae	g__norank_f__Caldilineaceae	s__uncultured_bacterium_g__norank_f__Caldilineaceae	OTU342	6	0	2	1	10	0	1	1	0	0	0	0	0	0	0	0	1	1	0	0	23
d__Bacteria	k__norank_d__Bacteria	p__Spirochaetota	c__Spirochaetia	o__Spirochaetales	f__Spirochaetaceae	g__Sediminispirochaeta	s__uncultured_bacterium_g__Sediminispirochaeta	OTU1698	0	0	0	1	0	0	0	0	0	0	0	0	0	0	0	0	0	0	0	0	1
d__Bacteria	k__norank_d__Bacteria	p__Actinobacteriota	c__Actinobacteria	o__Propionibacteriales	f__Propionibacteriaceae	g__Propioniciclava	s__uncultured_bacterium_g__Propioniciclava	OTU1813	0	1	1	5	5	0	3	1	4	3	1	0	0	0	0	0	0	1	1	1	27
d__Bacteria	k__norank_d__Bacteria	p__Acidobacteriota	c__Acidobacteriae	o__Bryobacterales	f__Bryobacteraceae	g__Bryobacter	s__unclassified_g__Bryobacter	OTU530	7	4	0	0	0	2	1	4	0	1	0	0	0	0	2	0	1	0	0	0	22
d__Bacteria	k__norank_d__Bacteria	p__Proteobacteria	c__Gammaproteobacteria	o__KF-JG30-C25	f__norank_o__KF-JG30-C25	g__norank_f__norank_o__KF-JG30-C25	s__uncultured_organism_g__norank_f__norank_o__KF-JG30-C25	OTU3625	3	0	0	0	0	0	1	1	0	0	0	0	0	0	0	0	0	0	0	0	5
d__Bacteria	k__norank_d__Bacteria	p__Chloroflexi	c__Anaerolineae	o__Ardenticatenales	f__norank_o__Ardenticatenales	g__norank_f__norank_o__Ardenticatenales	s__uncultured_prokaryote_g__norank_f__norank_o__Ardenticatenales	OTU6493	6	4	5	3	3	3	4	6	6	8	0	0	0	0	0	0	0	0	0	0	48
d__Bacteria	k__norank_d__Bacteria	p__Firmicutes	c__Clostridia	o__norank_c__Clostridia	f__Hungateiclostridiaceae	g__unclassified_f__Hungateiclostridiaceae	s__unclassified_f__Hungateiclostridiaceae	OTU8721	1	1	2	0	0	0	2	0	1	4	0	0	0	0	0	0	0	0	0	1	12
d__Bacteria	k__norank_d__Bacteria	p__Chloroflexi	c__unclassified_p__Chloroflexi	o__unclassified_p__Chloroflexi	f__unclassified_p__Chloroflexi	g__unclassified_p__Chloroflexi	s__unclassified_p__Chloroflexi	OTU1810	0	0	1	0	2	1	1	0	1	1	0	0	0	0	0	0	0	0	0	0	7
d__Bacteria	k__norank_d__Bacteria	p__Firmicutes	c__Clostridia	o__Clostridia_UCG-014	f__norank_o__Clostridia_UCG-014	g__norank_f__norank_o__Clostridia_UCG-014	s__uncultured_bacterium_g__norank_f__norank_o__Clostridia_UCG-014	OTU7854	0	0	0	0	0	0	0	0	0	0	0	0	0	0	2	0	1	0	0	1	4
d__Bacteria	k__norank_d__Bacteria	p__Firmicutes	c__Negativicutes	o__Veillonellales-Selenomonadales	f__Sporomusaceae	g__norank_f__Sporomusaceae	s__uncultured_bacterium_g__norank_f__Sporomusaceae	OTU603	1	8	5	3	2	5	3	1	1	0	1	3	4	1	0	0	1	4	0	6	49
d__Bacteria	k__norank_d__Bacteria	p__Desulfobacterota	c__Desulfomonilia	o__Desulfomonilales	f__Desulfomonilaceae	g__Desulfomonile	s__uncultured_bacterium_g__Desulfomonile	OTU3830	0	0	0	0	1	1	0	0	0	1	0	0	0	0	0	0	0	0	0	0	3
d__Bacteria	k__norank_d__Bacteria	p__Proteobacteria	c__Alphaproteobacteria	o__unclassified_c__Alphaproteobacteria	f__unclassified_c__Alphaproteobacteria	g__unclassified_c__Alphaproteobacteria	s__unclassified_c__Alphaproteobacteria	OTU3179	2	1	0	0	0	3	0	0	0	1	0	0	0	0	0	0	0	0	0	0	7
d__Bacteria	k__norank_d__Bacteria	p__Acidobacteriota	c__Vicinamibacteria	o__Vicinamibacterales	f__norank_o__Vicinamibacterales	g__norank_f__norank_o__Vicinamibacterales	s__unclassified_g__norank_f__norank_o__Vicinamibacterales	OTU4666	27	2	1	0	3	39	5	4	0	0	0	0	0	0	0	0	0	0	0	0	81
d__Bacteria	k__norank_d__Bacteria	p__Desulfobacterota	c__Desulfovibrionia	o__Desulfovibrionales	f__Desulfomicrobiaceae	g__Desulfomicrobium	s__uncultured_bacterium_g__Desulfomicrobium	OTU8605	1	15	3	22	5	0	8	2	0	34	0	4	0	0	3	0	1	0	1	1	100
d__Bacteria	k__norank_d__Bacteria	p__Proteobacteria	c__Gammaproteobacteria	o__Burkholderiales	f__Rhodocyclaceae	g__unclassified_f__Rhodocyclaceae	s__unclassified_f__Rhodocyclaceae	OTU8494	0	0	0	0	0	0	0	0	0	0	0	0	0	0	0	0	0	1	1	1	3
d__Bacteria	k__norank_d__Bacteria	p__Proteobacteria	c__Alphaproteobacteria	o__Rhizobiales	f__Rhizobiales_Incertae_Sedis	g__Phreatobacter	s__uncultured_bacterium_g__Phreatobacter	OTU8019	6	6	6	8	8	0	4	6	0	2	3	1	3	5	2	25	21	7	14	3	130
d__Bacteria	k__norank_d__Bacteria	p__Patescibacteria	c__Parcubacteria	o__Candidatus_Kaiserbacteria	f__norank_o__Candidatus_Kaiserbacteria	g__norank_f__norank_o__Candidatus_Kaiserbacteria	s__uncultured_bacterium_g__norank_f__norank_o__Candidatus_Kaiserbacteria	OTU8778	0	0	0	0	0	0	0	0	0	0	0	0	0	0	0	0	0	1	0	0	1
d__Bacteria	k__norank_d__Bacteria	p__Desulfobacterota	c__Syntrophia	o__Syntrophales	f__norank_o__Syntrophales	g__norank_f__norank_o__Syntrophales	s__uncultured_delta_proteobacterium_g__norank_f__norank_o__Syntrophales	OTU5172	0	0	0	0	0	0	0	0	2	0	0	0	0	0	0	0	1	0	0	0	3
d__Bacteria	k__norank_d__Bacteria	p__Sva0485	c__norank_p__Sva0485	o__norank_c__norank_p__Sva0485	f__norank_o__norank_c__norank_p__Sva0485	g__norank_f__norank_o__norank_c__norank_p__Sva0485	s__uncultured_delta_proteobacterium_g__norank_f__norank_o__norank_c__norank_p__Sva0485	OTU4441	0	0	1	3	1	1	3	0	23	1	0	0	0	1	0	0	0	0	0	0	34
d__Bacteria	k__norank_d__Bacteria	p__Patescibacteria	c__Saccharimonadia	o__Saccharimonadales	f__LWQ8	g__norank_f__LWQ8	s__uncultured_bacterium_g__norank_f__LWQ8	OTU2113	0	0	0	0	1	0	1	0	0	0	1	0	0	0	1	1	1	0	0	0	6
d__Bacteria	k__norank_d__Bacteria	p__unclassified_k__norank_d__Bacteria	c__unclassified_k__norank_d__Bacteria	o__unclassified_k__norank_d__Bacteria	f__unclassified_k__norank_d__Bacteria	g__unclassified_k__norank_d__Bacteria	s__unclassified_k__norank_d__Bacteria	OTU5139	0	0	0	2	0	0	2	1	1	0	0	0	0	0	0	0	0	0	0	0	6
d__Bacteria	k__norank_d__Bacteria	p__Spirochaetota	c__V2072-189E03	o__norank_c__V2072-189E03	f__norank_o__norank_c__V2072-189E03	g__norank_f__norank_o__norank_c__V2072-189E03	s__metagenome_g__norank_f__norank_o__norank_c__V2072-189E03	OTU556	1	1	0	0	0	0	0	0	0	1	0	1	2	1	2	0	0	0	0	0	9
d__Bacteria	k__norank_d__Bacteria	p__Chloroflexi	c__unclassified_p__Chloroflexi	o__unclassified_p__Chloroflexi	f__unclassified_p__Chloroflexi	g__unclassified_p__Chloroflexi	s__unclassified_p__Chloroflexi	OTU3144	0	0	0	0	0	1	0	0	0	0	0	0	0	0	0	0	0	0	0	0	1
d__Bacteria	k__norank_d__Bacteria	p__Bacteroidota	c__Bacteroidia	o__Bacteroidales	f__SB-5	g__norank_f__SB-5	s__uncultured_bacterium_g__norank_f__SB-5	OTU5790	0	0	0	3	1	0	1	4	12	1	0	0	0	0	0	0	0	0	0	0	22
d__Bacteria	k__norank_d__Bacteria	p__Patescibacteria	c__WWE3	o__norank_c__WWE3	f__norank_o__norank_c__WWE3	g__norank_f__norank_o__norank_c__WWE3	s__uncultured_anaerobic_bacterium_g__norank_f__norank_o__norank_c__WWE3	OTU4475	0	1	0	0	0	0	1	0	0	0	0	0	0	0	0	0	0	0	0	0	2
d__Bacteria	k__norank_d__Bacteria	p__Chloroflexi	c__Anaerolineae	o__KZNMV-5-B42	f__norank_o__KZNMV-5-B42	g__norank_f__norank_o__KZNMV-5-B42	s__unclassified_g__norank_f__norank_o__KZNMV-5-B42	OTU5254	0	0	0	0	0	0	0	0	1	0	0	0	0	0	0	0	0	0	0	0	1
d__Bacteria	k__norank_d__Bacteria	p__Caldisericota	c__Caldisericia	o__Caldisericales	f__LF045	g__norank_f__LF045	s__metagenome_g__norank_f__LF045	OTU7583	3	2	2	2	5	3	5	0	5	4	0	0	0	0	0	0	0	0	0	0	31
d__Bacteria	k__norank_d__Bacteria	p__Chloroflexi	c__Anaerolineae	o__Anaerolineales	f__Anaerolineaceae	g__RBG-16-58-14	s__uncultured_bacterium_g__RBG-16-58-14	OTU4132	0	5	2	1	1	3	4	1	19	2	0	0	0	0	0	0	0	0	0	0	38
d__Bacteria	k__norank_d__Bacteria	p__Firmicutes	c__Bacilli	o__Erysipelotrichales	f__Erysipelotrichaceae	g__ZOR0006	s__Firmicutes_bacterium_g__ZOR0006	OTU8302	0	0	0	0	0	0	0	0	0	0	0	0	0	0	0	0	0	0	1	0	1
d__Bacteria	k__norank_d__Bacteria	p__Chloroflexi	c__OLB14	o__norank_c__OLB14	f__norank_o__norank_c__OLB14	g__norank_f__norank_o__norank_c__OLB14	s__metagenome_g__norank_f__norank_o__norank_c__OLB14	OTU4994	15	4	11	8	27	5	8	22	6	8	0	0	0	1	0	0	0	0	0	1	116
d__Bacteria	k__norank_d__Bacteria	p__Planctomycetota	c__Planctomycetes	o__Gemmatales	f__Gemmataceae	g__norank_f__Gemmataceae	s__unclassified_g__norank_f__Gemmataceae	OTU3042	6	2	0	0	1	1	0	1	0	0	0	0	0	0	0	0	0	0	0	0	11
d__Bacteria	k__norank_d__Bacteria	p__Chloroflexi	c__JG30-KF-CM66	o__norank_c__JG30-KF-CM66	f__norank_o__norank_c__JG30-KF-CM66	g__norank_f__norank_o__norank_c__JG30-KF-CM66	s__uncultured_bacterium_g__norank_f__norank_o__norank_c__JG30-KF-CM66	OTU394	12	3	1	0	0	11	8	1	1	1	0	0	0	0	1	0	0	0	1	0	40
d__Bacteria	k__norank_d__Bacteria	p__Bdellovibrionota	c__Oligoflexia	o__Silvanigrellales	f__Silvanigrellaceae	g__Silvanigrella	s__unclassified_g__Silvanigrella	OTU8231	0	0	0	0	0	0	0	0	0	0	0	0	0	0	0	0	0	1	2	0	3
d__Bacteria	k__norank_d__Bacteria	p__Actinobacteriota	c__MB-A2-108	o__norank_c__MB-A2-108	f__norank_o__norank_c__MB-A2-108	g__norank_f__norank_o__norank_c__MB-A2-108	s__unclassified_g__norank_f__norank_o__norank_c__MB-A2-108	OTU3197	0	0	0	0	1	10	3	3	0	3	0	0	0	0	0	0	0	0	0	0	20
d__Bacteria	k__norank_d__Bacteria	p__Gemmatimonadota	c__Gemmatimonadetes	o__Gemmatimonadales	f__Gemmatimonadaceae	g__Gemmatimonas	s__uncultured_soil_bacterium_g__Gemmatimonas	OTU4699	0	0	0	0	0	0	0	1	0	0	0	0	0	0	0	0	0	0	0	0	1
d__Bacteria	k__norank_d__Bacteria	p__Proteobacteria	c__Alphaproteobacteria	o__Rhizobiales	f__unclassified_o__Rhizobiales	g__unclassified_o__Rhizobiales	s__unclassified_o__Rhizobiales	OTU8677	0	0	0	1	0	0	0	4	0	0	0	0	0	0	0	0	0	0	0	2	7
d__Bacteria	k__norank_d__Bacteria	p__Actinobacteriota	c__Acidimicrobiia	o__Microtrichales	f__norank_o__Microtrichales	g__norank_f__norank_o__Microtrichales	s__uncultured_bacterium_g__norank_f__norank_o__Microtrichales	OTU1140	1	0	4	3	1	0	0	1	0	1	0	0	0	0	0	0	0	0	0	0	11
d__Bacteria	k__norank_d__Bacteria	p__Proteobacteria	c__Alphaproteobacteria	o__Acetobacterales	f__Acetobacteraceae	g__unclassified_f__Acetobacteraceae	s__unclassified_f__Acetobacteraceae	OTU252	3	0	0	0	2	1	2	2	0	2	0	0	0	0	0	0	0	0	0	0	12
d__Bacteria	k__norank_d__Bacteria	p__Chloroflexi	c__Anaerolineae	o__SBR1031	f__norank_o__SBR1031	g__norank_f__norank_o__SBR1031	s__uncultured_Caldilineaceae_bacterium_g__norank_f__norank_o__SBR1031	OTU4244	0	0	10	1	0	0	0	5	0	0	0	0	0	0	0	0	0	0	0	0	16
d__Bacteria	k__norank_d__Bacteria	p__Desulfobacterota	c__Desulfovibrionia	o__Desulfovibrionales	f__Desulfovibrionaceae	g__Desulfovibrio	s__Desulfovibrio_vulgaris_str._Miyazaki_F	OTU1209	0	0	1	0	0	0	0	0	0	0	0	0	0	0	0	0	0	1	0	1	3
d__Bacteria	k__norank_d__Bacteria	p__Spirochaetota	c__V2072-189E03	o__norank_c__V2072-189E03	f__norank_o__norank_c__V2072-189E03	g__norank_f__norank_o__norank_c__V2072-189E03	s__unclassified_g__norank_f__norank_o__norank_c__V2072-189E03	OTU7453	0	1	1	2	0	0	3	0	0	1	0	4	3	3	3	2	0	0	0	0	23
d__Bacteria	k__norank_d__Bacteria	p__Chloroflexi	c__Anaerolineae	o__SJA-15	f__norank_o__SJA-15	g__norank_f__norank_o__SJA-15	s__uncultured_bacterium_g__norank_f__norank_o__SJA-15	OTU4126	7	7	11	23	24	15	59	22	157	22	0	1	0	0	0	0	0	0	0	0	348
d__Bacteria	k__norank_d__Bacteria	p__Actinobacteriota	c__Thermoleophilia	o__Solirubrobacterales	f__Solirubrobacteraceae	g__unclassified_f__Solirubrobacteraceae	s__unclassified_f__Solirubrobacteraceae	OTU1333	0	0	1	1	0	0	0	0	0	0	0	0	0	0	0	0	0	0	0	0	2
d__Bacteria	k__norank_d__Bacteria	p__Verrucomicrobiota	c__Omnitrophia	o__Omnitrophales	f__Omnitrophaceae	g__Candidatus_Omnitrophus	s__unclassified_g__Candidatus_Omnitrophus	OTU8954	0	0	0	0	0	0	0	0	0	0	0	0	0	0	0	0	0	2	0	0	2
d__Bacteria	k__norank_d__Bacteria	p__Chloroflexi	c__Anaerolineae	o__SBR1031	f__norank_o__SBR1031	g__norank_f__norank_o__SBR1031	s__uncultured_bacterium_g__norank_f__norank_o__SBR1031	OTU3724	0	1	0	0	0	0	2	0	3	0	0	0	0	0	0	0	0	0	0	0	6
d__Bacteria	k__norank_d__Bacteria	p__Proteobacteria	c__Gammaproteobacteria	o__Burkholderiales	f__Neisseriaceae	g__norank_f__Neisseriaceae	s__uncultured_beta_proteobacterium_g__norank_f__Neisseriaceae	OTU8153	0	0	0	0	0	0	0	0	0	0	0	0	0	0	0	0	1	0	0	0	1
d__Bacteria	k__norank_d__Bacteria	p__Patescibacteria	c__Microgenomatia	o__Candidatus_Pacebacteria	f__norank_o__Candidatus_Pacebacteria	g__norank_f__norank_o__Candidatus_Pacebacteria	s__uncultured_bacterium_g__norank_f__norank_o__Candidatus_Pacebacteria	OTU734	1	5	1	1	0	0	0	0	0	0	0	0	0	0	0	1	0	0	0	0	9
d__Bacteria	k__norank_d__Bacteria	p__Bacteroidota	c__Bacteroidia	o__Bacteroidales	f__Bacteroidaceae	g__Bacteroides	s__Bacteroides_vulgatus	OTU8709	0	0	0	0	0	0	0	0	0	0	6	17	43	19	33	2	5	38	72	24	259
d__Bacteria	k__norank_d__Bacteria	p__Bacteroidota	c__Bacteroidia	o__Sphingobacteriales	f__Lentimicrobiaceae	g__Lentimicrobium	s__unclassified_g__Lentimicrobium	OTU3725	0	0	0	0	0	0	1	1	0	1	0	0	0	0	0	0	0	0	0	0	3
d__Bacteria	k__norank_d__Bacteria	p__Gemmatimonadota	c__Gemmatimonadetes	o__Gemmatimonadales	f__Gemmatimonadaceae	g__unclassified_f__Gemmatimonadaceae	s__unclassified_f__Gemmatimonadaceae	OTU85	21	4	0	1	3	20	1	8	1	5	1	0	1	0	0	0	2	0	0	0	68
d__Bacteria	k__norank_d__Bacteria	p__Planctomycetota	c__Planctomycetes	o__Gemmatales	f__Gemmataceae	g__norank_f__Gemmataceae	s__uncultured_bacterium_g__norank_f__Gemmataceae	OTU516	0	0	0	0	1	0	0	0	0	1	0	0	0	0	0	0	0	0	0	0	2
d__Bacteria	k__norank_d__Bacteria	p__Proteobacteria	c__Gammaproteobacteria	o__Coxiellales	f__Coxiellaceae	g__Coxiella	s__uncultured_Coxiellaceae_bacterium_g__Coxiella	OTU6350	0	1	1	1	0	0	0	0	0	1	0	0	0	0	0	0	1	0	0	0	5
d__Bacteria	k__norank_d__Bacteria	p__Firmicutes	c__Desulfotomaculia	o__Desulfotomaculales	f__norank_o__Desulfotomaculales	g__Pelotomaculum	s__uncultured_Pelotomaculum_sp._g__Pelotomaculum	OTU3013	0	0	0	1	0	3	1	0	0	0	0	0	0	0	0	0	1	1	0	1	8
d__Bacteria	k__norank_d__Bacteria	p__Cyanobacteria	c__Cyanobacteriia	o__Chloroplast	f__norank_o__Chloroplast	g__norank_f__norank_o__Chloroplast	s__Parachlorella_kessleri	OTU7402	0	0	0	0	0	0	0	0	0	0	0	0	1	0	1	0	0	0	0	0	2
d__Bacteria	k__norank_d__Bacteria	p__Dependentiae	c__Babeliae	o__Babeliales	f__unclassified_o__Babeliales	g__unclassified_o__Babeliales	s__unclassified_o__Babeliales	OTU5725	0	0	0	0	0	0	0	0	0	1	0	0	0	0	0	0	0	0	0	0	1
d__Bacteria	k__norank_d__Bacteria	p__Bacteroidota	c__Bacteroidia	o__Sphingobacteriales	f__NS11-12_marine_group	g__norank_f__NS11-12_marine_group	s__unclassified_g__norank_f__NS11-12_marine_group	OTU6261	1	1	0	0	0	0	0	0	0	2	0	0	0	0	0	0	0	0	0	0	4
d__Bacteria	k__norank_d__Bacteria	p__Actinobacteriota	c__Acidimicrobiia	o__Microtrichales	f__Ilumatobacteraceae	g__norank_f__Ilumatobacteraceae	s__uncultured_bacterium_g__norank_f__Ilumatobacteraceae	OTU4629	1	1	0	0	2	2	2	1	0	2	0	0	0	0	0	0	0	0	0	0	11
d__Bacteria	k__norank_d__Bacteria	p__Proteobacteria	c__Alphaproteobacteria	o__Rickettsiales	f__Fokiniaceae	g__norank_f__Fokiniaceae	s__uncultured_bacterium_g__norank_f__Fokiniaceae	OTU7191	0	0	0	0	0	0	0	0	0	0	0	0	0	4	0	0	0	0	0	0	4
d__Bacteria	k__norank_d__Bacteria	p__Chloroflexi	c__Anaerolineae	o__RBG-13-54-9	f__norank_o__RBG-13-54-9	g__norank_f__norank_o__RBG-13-54-9	s__unclassified_g__norank_f__norank_o__RBG-13-54-9	OTU4081	1	0	0	0	1	0	0	0	0	0	0	0	0	0	0	0	0	0	0	0	2
d__Bacteria	k__norank_d__Bacteria	p__Chloroflexi	c__Anaerolineae	o__RBG-13-54-9	f__norank_o__RBG-13-54-9	g__norank_f__norank_o__RBG-13-54-9	s__unclassified_g__norank_f__norank_o__RBG-13-54-9	OTU4086	1	0	0	1	0	1	3	1	8	0	0	0	0	0	0	0	0	0	0	0	15
d__Bacteria	k__norank_d__Bacteria	p__Calditrichota	c__Calditrichia	o__Calditrichales	f__Calditrichaceae	g__norank_f__Calditrichaceae	s__unclassified_g__norank_f__Calditrichaceae	OTU1739	0	0	0	1	0	0	0	0	0	0	0	0	0	0	0	0	0	0	0	0	1
d__Bacteria	k__norank_d__Bacteria	p__Chloroflexi	c__Anaerolineae	o__SJA-15	f__norank_o__SJA-15	g__norank_f__norank_o__SJA-15	s__uncultured_bacterium_g__norank_f__norank_o__SJA-15	OTU3299	1	1	1	4	28	17	15	13	39	9	0	0	0	0	0	2	0	0	0	0	130
d__Bacteria	k__norank_d__Bacteria	p__NB1-j	c__norank_p__NB1-j	o__norank_c__norank_p__NB1-j	f__norank_o__norank_c__norank_p__NB1-j	g__norank_f__norank_o__norank_c__norank_p__NB1-j	s__uncultured_bacterium_g__norank_f__norank_o__norank_c__norank_p__NB1-j	OTU6125	20	14	3	4	7	6	4	5	6	4	1	0	0	1	0	0	1	0	0	0	76
d__Bacteria	k__norank_d__Bacteria	p__Patescibacteria	c__Gracilibacteria	o__Candidatus_Peribacteria	f__norank_o__Candidatus_Peribacteria	g__norank_f__norank_o__Candidatus_Peribacteria	s__uncultured_bacterium_g__norank_f__norank_o__Candidatus_Peribacteria	OTU8507	0	0	0	0	0	0	0	0	0	0	0	0	1	0	0	0	0	0	1	0	2
d__Bacteria	k__norank_d__Bacteria	p__Proteobacteria	c__Gammaproteobacteria	o__Burkholderiales	f__unclassified_o__Burkholderiales	g__unclassified_o__Burkholderiales	s__unclassified_o__Burkholderiales	OTU2963	0	0	0	0	0	1	0	0	0	0	0	0	0	0	0	0	0	0	0	0	1
d__Bacteria	k__norank_d__Bacteria	p__Firmicutes	c__Bacilli	o__Lactobacillales	f__Streptococcaceae	g__Streptococcus	s__unclassified_g__Streptococcus	OTU7896	3	0	5	1	2	0	0	0	0	0	2	0	1	0	1	0	0	5	2	1	23
d__Bacteria	k__norank_d__Bacteria	p__Acidobacteriota	c__Acidobacteriae	o__Subgroup_2	f__norank_o__Subgroup_2	g__norank_f__norank_o__Subgroup_2	s__uncultured_bacterium_g__norank_f__norank_o__Subgroup_2	OTU2594	0	0	0	0	0	1	1	0	0	0	0	0	0	0	0	0	0	0	0	0	2
d__Bacteria	k__norank_d__Bacteria	p__Bacteroidota	c__Bacteroidia	o__Cytophagales	f__Amoebophilaceae	g__Candidatus_Amoebophilus	s__unclassified_g__Candidatus_Amoebophilus	OTU6356	0	3	0	1	0	0	0	0	0	2	0	0	0	0	0	0	0	0	0	0	6
d__Bacteria	k__norank_d__Bacteria	p__Chloroflexi	c__Anaerolineae	o__SBR1031	f__A4b	g__norank_f__A4b	s__uncultured_bacterium_g__norank_f__A4b	OTU5367	0	0	0	0	0	0	0	0	2	1	0	0	0	0	0	0	0	0	0	0	3
d__Bacteria	k__norank_d__Bacteria	p__Acidobacteriota	c__Vicinamibacteria	o__Vicinamibacterales	f__norank_o__Vicinamibacterales	g__norank_f__norank_o__Vicinamibacterales	s__uncultured_Acidobacteria_bacterium_g__norank_f__norank_o__Vicinamibacterales	OTU6671	0	0	0	0	0	1	2	0	0	0	1	0	0	0	0	0	0	0	0	0	4
d__Bacteria	k__norank_d__Bacteria	p__Bacteroidota	c__Bacteroidia	o__Bacteroidales	f__Marinilabiliaceae	g__Cytophaga_xylanolytica_group	s__unclassified_g__Cytophaga_xylanolytica_group	OTU5621	0	0	0	0	2	0	0	0	1	0	0	0	0	0	0	0	0	0	0	0	3
d__Bacteria	k__norank_d__Bacteria	p__Myxococcota	c__Polyangia	o__Nannocystales	f__Nannocystaceae	g__unclassified_f__Nannocystaceae	s__unclassified_f__Nannocystaceae	OTU4829	7	0	3	2	14	61	2	8	3	2	0	0	0	0	0	0	0	0	0	0	102
d__Bacteria	k__norank_d__Bacteria	p__Latescibacterota	c__norank_p__Latescibacterota	o__norank_c__norank_p__Latescibacterota	f__norank_o__norank_c__norank_p__Latescibacterota	g__norank_f__norank_o__norank_c__norank_p__Latescibacterota	s__unclassified_g__norank_f__norank_o__norank_c__norank_p__Latescibacterota	OTU4266	0	0	0	0	0	1	0	0	0	0	0	0	0	0	0	0	0	0	0	0	1
d__Bacteria	k__norank_d__Bacteria	p__Bacteroidota	c__Bacteroidia	o__Bacteroidales	f__Bacteroidetes_vadinHA17	g__norank_f__Bacteroidetes_vadinHA17	s__unclassified_g__norank_f__Bacteroidetes_vadinHA17	OTU1532	3	35	8	24	7	0	20	4	11	4	2	1	0	0	0	0	0	0	0	0	119
d__Bacteria	k__norank_d__Bacteria	p__Sumerlaeota	c__Sumerlaeia	o__Sumerlaeales	f__Sumerlaeaceae	g__Sumerlaea	s__uncultured_soil_bacterium_g__Sumerlaea	OTU430	0	1	2	1	0	0	0	0	0	0	0	0	0	0	0	0	0	0	0	0	4
d__Bacteria	k__norank_d__Bacteria	p__Bacteroidota	c__Bacteroidia	o__Flavobacteriales	f__Flavobacteriaceae	g__Flavobacterium	s__Flavobacterium_ummariense	OTU7847	0	0	0	0	0	0	0	0	0	0	0	0	0	0	0	1	1	1	3	5	11
d__Bacteria	k__norank_d__Bacteria	p__Firmicutes	c__Negativicutes	o__Acidaminococcales	f__Acidaminococcaceae	g__Phascolarctobacterium	s__uncultured_Firmicutes_bacterium_g__Phascolarctobacterium	OTU6868	0	0	0	0	0	0	0	0	0	0	0	0	0	0	0	0	0	2	0	0	2
d__Bacteria	k__norank_d__Bacteria	p__Proteobacteria	c__Gammaproteobacteria	o__unclassified_c__Gammaproteobacteria	f__unclassified_c__Gammaproteobacteria	g__unclassified_c__Gammaproteobacteria	s__unclassified_c__Gammaproteobacteria	OTU4299	0	0	1	1	0	2	1	2	4	0	0	0	0	0	0	0	0	0	0	0	11
d__Bacteria	k__norank_d__Bacteria	p__Bacteroidota	c__Bacteroidia	o__Chitinophagales	f__Chitinophagaceae	g__Ferruginibacter	s__unclassified_g__Ferruginibacter	OTU753	1	1	8	1	2	0	0	0	0	0	0	0	0	1	0	0	0	0	0	0	14
d__Bacteria	k__norank_d__Bacteria	p__Proteobacteria	c__Alphaproteobacteria	o__Rhizobiales	f__Rhodomicrobiaceae	g__Rhodomicrobium	s__uncultured_bacterium_g__Rhodomicrobium	OTU7221	1	0	0	0	0	0	0	1	0	0	0	0	0	1	0	0	0	0	0	0	3
d__Bacteria	k__norank_d__Bacteria	p__Firmicutes	c__Clostridia	o__norank_c__Clostridia	f__Hungateiclostridiaceae	g__Ruminiclostridium	s__metagenome_g__Ruminiclostridium	OTU5326	0	0	0	0	0	0	0	1	4	0	0	0	0	0	0	0	0	0	0	0	5
d__Bacteria	k__norank_d__Bacteria	p__Proteobacteria	c__Gammaproteobacteria	o__Burkholderiales	f__Chromobacteriaceae	g__Vogesella	s__Vogesella_lacus	OTU8405	0	0	0	0	0	0	0	0	0	0	0	0	0	0	0	0	0	0	4	2	6
d__Bacteria	k__norank_d__Bacteria	p__Spirochaetota	c__Leptospirae	o__Leptospirales	f__Leptospiraceae	g__Turneriella	s__metagenome_g__Turneriella	OTU8689	2	2	1	0	0	0	3	0	0	1	0	0	0	0	0	0	1	0	0	2	12
d__Bacteria	k__norank_d__Bacteria	p__Patescibacteria	c__Parcubacteria	o__Candidatus_Kaiserbacteria	f__norank_o__Candidatus_Kaiserbacteria	g__norank_f__norank_o__Candidatus_Kaiserbacteria	s__metagenome_g__norank_f__norank_o__Candidatus_Kaiserbacteria	OTU7138	0	1	0	0	0	0	0	0	0	0	2	0	1	2	0	1	0	0	0	0	7
d__Bacteria	k__norank_d__Bacteria	p__Bacteroidota	c__Bacteroidia	o__Chitinophagales	f__Saprospiraceae	g__Lewinella	s__uncultured_bacterium_g__Lewinella	OTU7400	0	0	0	0	0	0	0	0	0	0	2	20	10	4	2	2	5	0	0	0	45
d__Bacteria	k__norank_d__Bacteria	p__Chloroflexi	c__JG30-KF-CM66	o__norank_c__JG30-KF-CM66	f__norank_o__norank_c__JG30-KF-CM66	g__norank_f__norank_o__norank_c__JG30-KF-CM66	s__unclassified_g__norank_f__norank_o__norank_c__JG30-KF-CM66	OTU2473	0	0	0	0	0	4	1	0	0	0	0	0	0	0	0	0	0	0	0	0	5
d__Bacteria	k__norank_d__Bacteria	p__Proteobacteria	c__Gammaproteobacteria	o__Burkholderiales	f__Nitrosomonadaceae	g__norank_f__Nitrosomonadaceae	s__metagenome_g__norank_f__Nitrosomonadaceae	OTU1541	2	0	0	4	0	1	0	0	1	0	0	0	0	0	0	0	0	0	1	0	9
d__Bacteria	k__norank_d__Bacteria	p__Patescibacteria	c__Microgenomatia	o__Candidatus_Pacebacteria	f__norank_o__Candidatus_Pacebacteria	g__norank_f__norank_o__Candidatus_Pacebacteria	s__uncultured_bacterium_g__norank_f__norank_o__Candidatus_Pacebacteria	OTU995	0	0	1	1	0	0	0	0	0	0	0	0	0	0	0	1	0	0	0	0	3
d__Bacteria	k__norank_d__Bacteria	p__Chloroflexi	c__Anaerolineae	o__SBR1031	f__norank_o__SBR1031	g__norank_f__norank_o__SBR1031	s__unclassified_g__norank_f__norank_o__SBR1031	OTU2393	0	0	0	0	0	1	1	0	0	0	0	0	0	0	0	0	0	0	0	0	2
d__Bacteria	k__norank_d__Bacteria	p__Proteobacteria	c__Gammaproteobacteria	o__Burkholderiales	f__Rhodocyclaceae	g__unclassified_f__Rhodocyclaceae	s__unclassified_f__Rhodocyclaceae	OTU5811	19	21	36	34	64	14	64	67	16	87	2	2	0	0	1	6	5	3	7	8	456
d__Bacteria	k__norank_d__Bacteria	p__Cyanobacteria	c__Cyanobacteriia	o__Cyanobacteriales	f__Coleofasciculaceae	g__Microcoleus_PCC-7113	s__Microcoleus_sp._PCC_7113	OTU1829	0	0	0	0	4	0	2	0	0	0	0	0	0	0	1	0	0	0	0	0	7
d__Bacteria	k__norank_d__Bacteria	p__Acidobacteriota	c__AT-s3-28	o__norank_c__AT-s3-28	f__norank_o__norank_c__AT-s3-28	g__norank_f__norank_o__norank_c__AT-s3-28	s__unclassified_g__norank_f__norank_o__norank_c__AT-s3-28	OTU331	1	0	0	0	0	0	1	0	0	0	0	0	0	0	0	0	0	0	0	0	2
d__Bacteria	k__norank_d__Bacteria	p__Proteobacteria	c__Gammaproteobacteria	o__Burkholderiales	f__Gallionellaceae	g__Gallionella	s__uncultured_Gallionella_sp._g__Gallionella	OTU478	0	3	0	0	0	0	0	0	0	0	0	0	1	0	0	0	0	0	0	0	4
d__Bacteria	k__norank_d__Bacteria	p__GAL15	c__norank_p__GAL15	o__norank_c__norank_p__GAL15	f__norank_o__norank_c__norank_p__GAL15	g__norank_f__norank_o__norank_c__norank_p__GAL15	s__uncultured_bacterium_g__norank_f__norank_o__norank_c__norank_p__GAL15	OTU3138	0	1	0	0	0	7	0	2	0	1	0	0	0	0	0	0	0	0	0	0	11
d__Bacteria	k__norank_d__Bacteria	p__Chloroflexi	c__Chloroflexia	o__Thermomicrobiales	f__JG30-KF-CM45	g__norank_f__JG30-KF-CM45	s__uncultured_bacterium_g__norank_f__JG30-KF-CM45	OTU2468	6	6	1	1	3	8	6	3	0	1	0	0	0	0	0	0	1	0	0	2	38
d__Bacteria	k__norank_d__Bacteria	p__Myxococcota	c__Polyangia	o__Nannocystales	f__Nannocystaceae	g__Nannocystis	s__uncultured_bacterium_g__Nannocystis	OTU2817	7	2	1	1	0	1	1	0	0	0	0	0	0	0	0	0	0	0	0	0	13
d__Bacteria	k__norank_d__Bacteria	p__Bacteroidota	c__Bacteroidia	o__Bacteroidales	f__SB-5	g__norank_f__SB-5	s__uncultured_bacterium_g__norank_f__SB-5	OTU6010	2	3	5	11	17	2	18	18	63	9	0	0	0	0	0	0	0	0	0	0	148
d__Bacteria	k__norank_d__Bacteria	p__Actinobacteriota	c__Actinobacteria	o__Kineosporiales	f__Kineosporiaceae	g__unclassified_f__Kineosporiaceae	s__unclassified_f__Kineosporiaceae	OTU8294	0	0	0	0	1	0	0	2	0	0	0	0	0	0	0	1	2	0	1	0	7
d__Bacteria	k__norank_d__Bacteria	p__Chloroflexi	c__Anaerolineae	o__SBR1031	f__norank_o__SBR1031	g__norank_f__norank_o__SBR1031	s__uncultured_bacterium_g__norank_f__norank_o__SBR1031	OTU6496	3	28	1	0	0	5	5	2	0	0	0	0	0	0	0	0	0	0	0	0	44
d__Bacteria	k__norank_d__Bacteria	p__Chloroflexi	c__Anaerolineae	o__SBR1031	f__norank_o__SBR1031	g__norank_f__norank_o__SBR1031	s__uncultured_bacterium_g__norank_f__norank_o__SBR1031	OTU6497	0	0	0	0	0	0	0	0	0	1	0	0	0	0	0	0	0	0	0	0	1
d__Bacteria	k__norank_d__Bacteria	p__Chloroflexi	c__Anaerolineae	o__SBR1031	f__norank_o__SBR1031	g__norank_f__norank_o__SBR1031	s__unclassified_g__norank_f__norank_o__SBR1031	OTU4628	11	3	0	0	3	1	3	2	0	0	0	0	0	0	0	0	0	0	0	0	23
d__Bacteria	k__norank_d__Bacteria	p__Acidobacteriota	c__Thermoanaerobaculia	o__Thermoanaerobaculales	f__Thermoanaerobaculaceae	g__Thermoanaerobaculum	s__uncultured_prokaryote_g__Thermoanaerobaculum	OTU5073	0	4	3	4	0	0	10	10	5	7	0	0	0	0	0	0	0	0	0	0	43
d__Bacteria	k__norank_d__Bacteria	p__Proteobacteria	c__Gammaproteobacteria	o__Burkholderiales	f__Rhodocyclaceae	g__unclassified_f__Rhodocyclaceae	s__unclassified_f__Rhodocyclaceae	OTU8276	0	0	0	0	0	0	0	0	0	0	0	0	0	0	0	0	0	0	1	2	3
d__Bacteria	k__norank_d__Bacteria	p__unclassified_k__norank_d__Bacteria	c__unclassified_k__norank_d__Bacteria	o__unclassified_k__norank_d__Bacteria	f__unclassified_k__norank_d__Bacteria	g__unclassified_k__norank_d__Bacteria	s__unclassified_k__norank_d__Bacteria	OTU732	0	0	0	0	0	0	1	0	0	0	0	0	0	0	0	0	0	0	0	0	1
d__Bacteria	k__norank_d__Bacteria	p__Bdellovibrionota	c__Bdellovibrionia	o__Bacteriovoracales	f__Bacteriovoracaceae	g__Peredibacter	s__metagenome_g__Peredibacter	OTU1748	0	0	0	0	2	0	0	0	0	0	0	0	0	0	0	0	0	0	0	0	2
d__Bacteria	k__norank_d__Bacteria	p__Actinobacteriota	c__Thermoleophilia	o__Solirubrobacterales	f__Solirubrobacteraceae	g__Conexibacter	s__uncultured_bacterium_g__Conexibacter	OTU3208	0	0	0	0	0	4	2	0	0	0	0	0	0	0	0	0	0	0	1	0	7
d__Bacteria	k__norank_d__Bacteria	p__Myxococcota	c__Polyangia	o__Haliangiales	f__Haliangiaceae	g__Haliangium	s__uncultured_Haliangium_sp.	OTU12	6	1	0	0	5	4	3	0	2	0	0	0	0	0	0	0	0	0	0	0	21
d__Bacteria	k__norank_d__Bacteria	p__unclassified_k__norank_d__Bacteria	c__unclassified_k__norank_d__Bacteria	o__unclassified_k__norank_d__Bacteria	f__unclassified_k__norank_d__Bacteria	g__unclassified_k__norank_d__Bacteria	s__unclassified_k__norank_d__Bacteria	OTU2103	0	0	0	0	3	1	0	0	0	1	0	0	0	0	0	0	0	0	0	0	5
d__Bacteria	k__norank_d__Bacteria	p__Firmicutes	c__Limnochordia	o__norank_c__Limnochordia	f__norank_o__norank_c__Limnochordia	g__Hydrogenispora	s__uncultured_bacterium_g__Hydrogenispora	OTU3498	0	0	0	0	0	1	0	0	0	1	0	0	0	0	0	0	0	0	1	1	4
d__Bacteria	k__norank_d__Bacteria	p__Patescibacteria	c__WWE3	o__norank_c__WWE3	f__norank_o__norank_c__WWE3	g__norank_f__norank_o__norank_c__WWE3	s__unclassified_g__norank_f__norank_o__norank_c__WWE3	OTU3376	1	1	0	2	2	0	0	0	4	0	0	0	1	0	0	0	0	0	0	0	11
d__Bacteria	k__norank_d__Bacteria	p__Myxococcota	c__Myxococcia	o__Myxococcales	f__Myxococcaceae	g__norank_f__Myxococcaceae	s__unclassified_g__norank_f__Myxococcaceae	OTU4041	1	0	0	1	0	0	4	0	2	1	0	0	0	0	0	0	0	0	0	0	9
d__Bacteria	k__norank_d__Bacteria	p__Spirochaetota	c__Spirochaetia	o__Spirochaetales	f__Spirochaetaceae	g__Treponema	s__unclassified_g__Treponema	OTU84	2	46	20	10	4	2	12	0	0	2	0	3	1	13	5	1	2	0	1	3	127
d__Bacteria	k__norank_d__Bacteria	p__Myxococcota	c__Polyangia	o__Polyangiales	f__Phaselicystidaceae	g__Phaselicystis	s__unclassified_g__Phaselicystis	OTU4764	9	3	1	1	3	9	3	1	1	1	0	0	0	0	0	0	0	0	0	0	32
d__Bacteria	k__norank_d__Bacteria	p__Cloacimonadota	c__Cloacimonadia	o__Cloacimonadales	f__Cloacimonadaceae	g__norank_f__Cloacimonadaceae	s__uncultured_bacterium_g__norank_f__Cloacimonadaceae	OTU5435	0	0	0	1	0	0	1	0	1	0	0	0	0	0	0	0	0	0	1	0	4
d__Bacteria	k__norank_d__Bacteria	p__Chloroflexi	c__Anaerolineae	o__SBR1031	f__A4b	g__norank_f__A4b	s__uncultured_bacterium_g__norank_f__A4b	OTU3789	0	0	1	1	0	0	1	3	0	0	0	0	0	0	0	0	0	0	0	0	6
d__Bacteria	k__norank_d__Bacteria	p__Proteobacteria	c__Alphaproteobacteria	o__Rickettsiales	f__Mitochondria	g__norank_f__Mitochondria	s__unclassified_g__norank_f__Mitochondria	OTU7805	0	0	0	0	0	0	0	0	0	0	0	0	0	0	0	2	0	3	2	3	10
d__Bacteria	k__norank_d__Bacteria	p__Proteobacteria	c__Alphaproteobacteria	o__Micavibrionales	f__norank_o__Micavibrionales	g__norank_f__norank_o__Micavibrionales	s__unclassified_g__norank_f__norank_o__Micavibrionales	OTU8658	0	1	0	0	0	0	0	0	0	0	0	0	0	0	0	1	0	0	2	3	7
d__Bacteria	k__norank_d__Bacteria	p__Acidobacteriota	c__Vicinamibacteria	o__Vicinamibacterales	f__Vicinamibacteraceae	g__norank_f__Vicinamibacteraceae	s__uncultured_Acidobacteria_bacterium_g__norank_f__Vicinamibacteraceae	OTU1744	7	2	2	1	4	4	2	0	0	1	0	0	0	0	0	0	0	0	0	0	23
d__Bacteria	k__norank_d__Bacteria	p__Proteobacteria	c__Gammaproteobacteria	o__Methylococcales	f__Methylococcaceae	g__Methyloparacoccus	s__uncultured_bacterium_g__Methyloparacoccus	OTU4952	1	1	4	7	1	0	0	1	0	0	1	0	0	0	0	0	0	0	0	0	16
d__Bacteria	k__norank_d__Bacteria	p__Bacteroidota	c__Bacteroidia	o__Flavobacteriales	f__Weeksellaceae	g__Bergeyella	s__Chryseobacterium_sp._g__Bergeyella	OTU7408	0	0	1	0	0	0	0	0	0	0	1	0	0	0	1	0	0	1	0	0	4
d__Bacteria	k__norank_d__Bacteria	p__Sumerlaeota	c__Sumerlaeia	o__norank_c__Sumerlaeia	f__norank_o__norank_c__Sumerlaeia	g__norank_f__norank_o__norank_c__Sumerlaeia	s__uncultured_bacterium_g__norank_f__norank_o__norank_c__Sumerlaeia	OTU7664	0	0	0	0	0	0	0	1	0	2	0	0	0	0	0	0	0	0	0	0	3
d__Bacteria	k__norank_d__Bacteria	p__Proteobacteria	c__Alphaproteobacteria	o__Rhizobiales	f__Hyphomicrobiaceae	g__norank_f__Hyphomicrobiaceae	s__metagenome_g__norank_f__Hyphomicrobiaceae	OTU1330	1	1	6	1	11	3	7	7	1	2	0	0	0	0	0	0	0	1	0	0	41
d__Bacteria	k__norank_d__Bacteria	p__Chloroflexi	c__Anaerolineae	o__RBG-13-54-9	f__norank_o__RBG-13-54-9	g__norank_f__norank_o__RBG-13-54-9	s__uncultured_bacterium_g__norank_f__norank_o__RBG-13-54-9	OTU7357	0	0	0	0	0	0	0	0	0	0	5	7	0	5	7	0	0	0	0	0	24
d__Bacteria	k__norank_d__Bacteria	p__Desulfobacterota	c__Syntrophobacteria	o__Syntrophobacterales	f__Syntrophobacteraceae	g__norank_f__Syntrophobacteraceae	s__uncultured_bacterium_g__norank_f__Syntrophobacteraceae	OTU4282	0	0	0	0	2	0	0	1	0	1	0	0	0	0	0	0	0	0	0	0	4
d__Bacteria	k__norank_d__Bacteria	p__unclassified_k__norank_d__Bacteria	c__unclassified_k__norank_d__Bacteria	o__unclassified_k__norank_d__Bacteria	f__unclassified_k__norank_d__Bacteria	g__unclassified_k__norank_d__Bacteria	s__unclassified_k__norank_d__Bacteria	OTU1906	0	0	2	0	1	0	1	1	4	0	0	0	0	0	0	0	0	0	0	0	9
d__Bacteria	k__norank_d__Bacteria	p__Proteobacteria	c__Alphaproteobacteria	o__Kiloniellales	f__Kiloniellaceae	g__Tagaea	s__uncultured_bacterium_g__Tagaea	OTU3411	3	0	0	0	1	0	1	0	0	0	0	0	0	0	0	0	0	1	0	0	6
d__Bacteria	k__norank_d__Bacteria	p__Firmicutes	c__Negativicutes	o__Veillonellales-Selenomonadales	f__Sporomusaceae	g__Acetonema	s__uncultured_bacterium_g__Acetonema	OTU2708	0	0	0	0	0	0	0	0	1	0	0	0	0	0	0	0	0	0	0	0	1
d__Bacteria	k__norank_d__Bacteria	p__Desulfobacterota	c__Desulfomonilia	o__Desulfomonilales	f__Desulfomonilaceae	g__Desulfomonile	s__uncultured_bacterium_g__Desulfomonile	OTU6123	3	6	2	2	6	3	2	5	1	7	0	0	0	0	0	1	0	0	1	0	39
d__Bacteria	k__norank_d__Bacteria	p__Desulfobacterota	c__Desulfobacteria	o__Desulfobacterales	f__Desulfosarcinaceae	g__norank_f__Desulfosarcinaceae	s__unclassified_g__norank_f__Desulfosarcinaceae	OTU4517	0	2	0	1	0	0	0	1	3	0	0	0	0	0	0	0	0	0	0	0	7
d__Bacteria	k__norank_d__Bacteria	p__Acidobacteriota	c__Subgroup_25	o__norank_c__Subgroup_25	f__norank_o__norank_c__Subgroup_25	g__norank_f__norank_o__norank_c__Subgroup_25	s__uncultured_bacterium_g__norank_f__norank_o__norank_c__Subgroup_25	OTU2985	0	0	0	0	0	2	0	0	0	0	0	0	0	0	0	0	0	0	0	0	2
d__Bacteria	k__norank_d__Bacteria	p__Firmicutes	c__Bacilli	o__Paenibacillales	f__Paenibacillaceae	g__Paenibacillus	s__unclassified_g__Paenibacillus	OTU7379	0	0	1	0	3	3	2	1	2	1	1	1	0	0	0	0	0	0	1	0	16
d__Bacteria	k__norank_d__Bacteria	p__Verrucomicrobiota	c__Lentisphaeria	o__Oligosphaerales	f__Oligosphaeraceae	g__Z20	s__uncultured_bacterium_g__Z20	OTU6895	0	0	0	0	0	0	0	0	0	0	0	1	0	0	0	0	0	0	0	0	1
d__Bacteria	k__norank_d__Bacteria	p__Actinobacteriota	c__unclassified_p__Actinobacteriota	o__unclassified_p__Actinobacteriota	f__unclassified_p__Actinobacteriota	g__unclassified_p__Actinobacteriota	s__unclassified_p__Actinobacteriota	OTU167	6	0	2	0	1	1	1	2	0	1	0	0	1	0	0	0	0	0	0	0	15
d__Bacteria	k__norank_d__Bacteria	p__Cyanobacteria	c__Cyanobacteriia	o__Chloroplast	f__norank_o__Chloroplast	g__norank_f__norank_o__Chloroplast	s__unclassified_g__norank_f__norank_o__Chloroplast	OTU7524	0	0	0	0	0	0	0	0	0	0	0	0	0	0	0	3	2	0	0	0	5
d__Bacteria	k__norank_d__Bacteria	p__Cyanobacteria	c__Cyanobacteriia	o__Chloroplast	f__norank_o__Chloroplast	g__norank_f__norank_o__Chloroplast	s__unclassified_g__norank_f__norank_o__Chloroplast	OTU7523	0	0	0	0	0	0	0	0	0	0	0	1	0	0	0	0	1	0	2	2	6
d__Bacteria	k__norank_d__Bacteria	p__Cyanobacteria	c__Cyanobacteriia	o__Cyanobacteriales	f__Nostocaceae	g__Ancylothrix_8PC	s__Ancylothrix_terrestris_10PC	OTU1757	3	0	3	8	7	0	0	0	0	0	3	0	0	0	0	0	0	0	0	5	29
d__Bacteria	k__norank_d__Bacteria	p__Methylomirabilota	c__Methylomirabilia	o__Methylomirabilales	f__Methylomirabilaceae	g__Sh765B-TzT-35	s__uncultured_bacterium_g__Sh765B-TzT-35	OTU2452	0	0	0	0	0	55	2	1	0	0	0	0	0	0	0	0	0	0	0	0	58
d__Bacteria	k__norank_d__Bacteria	p__Chloroflexi	c__JG30-KF-CM66	o__norank_c__JG30-KF-CM66	f__norank_o__norank_c__JG30-KF-CM66	g__norank_f__norank_o__norank_c__JG30-KF-CM66	s__uncultured_bacterium_g__norank_f__norank_o__norank_c__JG30-KF-CM66	OTU4358	0	0	1	0	0	0	0	1	0	0	0	0	0	0	0	0	0	0	1	0	3
d__Bacteria	k__norank_d__Bacteria	p__Bacteroidota	c__SJA-28	o__norank_c__SJA-28	f__norank_o__norank_c__SJA-28	g__norank_f__norank_o__norank_c__SJA-28	s__uncultured_Chlorobi_bacterium_g__norank_f__norank_o__norank	OTU4978	3	0	1	0	2	0	3	2	1	0	0	0	0	0	0	0	0	0	0	0	12
d__Bacteria	k__norank_d__Bacteria	p__Firmicutes	c__Negativicutes	o__Veillonellales-Selenomonadales	f__Selenomonadaceae	g__Pectinatus	s__Pectinatus_brassicae	OTU8195	0	0	0	0	0	0	0	0	0	0	0	0	0	0	0	0	2	0	0	0	2
d__Bacteria	k__norank_d__Bacteria	p__Bacteroidota	c__Bacteroidia	o__unclassified_c__Bacteroidia	f__unclassified_c__Bacteroidia	g__unclassified_c__Bacteroidia	s__unclassified_c__Bacteroidia	OTU3850	0	0	0	0	0	0	9	0	0	0	0	0	0	0	0	0	0	0	0	0	9
d__Bacteria	k__norank_d__Bacteria	p__Spirochaetota	c__Spirochaetia	o__Spirochaetales	f__Spirochaetaceae	g__Spirochaeta	s__unclassified_g__Spirochaeta	OTU5371	0	0	0	0	0	0	0	0	1	0	0	0	0	0	0	0	0	0	0	0	1
d__Bacteria	k__norank_d__Bacteria	p__Spirochaetota	c__Spirochaetia	o__Spirochaetales	f__Spirochaetaceae	g__Spirochaeta	s__unclassified_g__Spirochaeta	OTU5370	0	0	0	0	0	0	0	0	3	1	0	0	0	0	0	0	0	0	0	0	4
d__Bacteria	k__norank_d__Bacteria	p__Patescibacteria	c__Saccharimonadia	o__Saccharimonadales	f__norank_o__Saccharimonadales	g__norank_f__norank_o__Saccharimonadales	s__uncultured_bacterium_g__norank_f__norank_o__Saccharimonadales	OTU3308	0	0	0	1	0	0	0	0	0	0	0	0	0	1	0	0	0	0	0	0	2
d__Bacteria	k__norank_d__Bacteria	p__Verrucomicrobiota	c__Verrucomicrobiae	o__Verrucomicrobiales	f__DEV007	g__norank_f__DEV007	s__uncultured_Verrucomicrobiales_bacterium_g__norank_f__DEV007	OTU6424	1	0	0	0	0	0	0	0	0	2	0	0	1	1	0	1	0	0	0	0	6
d__Bacteria	k__norank_d__Bacteria	p__Patescibacteria	c__Saccharimonadia	o__Saccharimonadales	f__norank_o__Saccharimonadales	g__norank_f__norank_o__Saccharimonadales	s__uncultured_bacterium_g__norank_f__norank_o__Saccharimonadales	OTU4465	0	0	0	1	0	0	0	1	0	0	0	0	0	0	0	0	0	0	0	1	3
d__Bacteria	k__norank_d__Bacteria	p__Bacteroidota	c__Bacteroidia	o__Chitinophagales	f__Chitinophagaceae	g__unclassified_f__Chitinophagaceae	s__unclassified_f__Chitinophagaceae	OTU7412	0	0	0	0	0	0	0	0	0	0	16	4	17	15	13	0	0	0	1	2	68
d__Bacteria	k__norank_d__Bacteria	p__Patescibacteria	c__Saccharimonadia	o__Saccharimonadales	f__norank_o__Saccharimonadales	g__norank_f__norank_o__Saccharimonadales	s__unclassified_g__norank_f__norank_o__Saccharimonadales	OTU7778	4	22	11	14	4	1	0	2	0	2	2	0	1	0	0	0	0	0	0	1	64
d__Bacteria	k__norank_d__Bacteria	p__Acidobacteriota	c__Thermoanaerobaculia	o__Thermoanaerobaculales	f__Thermoanaerobaculaceae	g__Thermoanaerobaculum	s__uncultured_bacterium_g__Thermoanaerobaculum	OTU3153	1	0	1	0	1	10	1	1	1	2	0	0	0	0	0	0	0	0	0	0	18
d__Bacteria	k__norank_d__Bacteria	p__Patescibacteria	c__Parcubacteria	o__Candidatus_Kaiserbacteria	f__norank_o__Candidatus_Kaiserbacteria	g__norank_f__norank_o__Candidatus_Kaiserbacteria	s__unclassified_g__norank_f__norank_o__Candidatus_Kaiserbacteria	OTU1534	0	0	0	1	0	0	0	0	0	1	0	1	0	1	0	1	1	0	2	1	9
d__Bacteria	k__norank_d__Bacteria	p__Patescibacteria	c__Berkelbacteria	o__norank_c__Berkelbacteria	f__norank_o__norank_c__Berkelbacteria	g__norank_f__norank_o__norank_c__Berkelbacteria	s__unclassified_g__norank_f__norank_o__norank_c__Berkelbacteria	OTU8416	0	0	0	0	0	0	0	0	0	0	0	0	0	0	0	0	0	2	0	0	2
d__Bacteria	k__norank_d__Bacteria	p__Firmicutes	c__Negativicutes	o__Veillonellales-Selenomonadales	f__Sporomusaceae	g__norank_f__Sporomusaceae	s__unclassified_g__norank_f__Sporomusaceae	OTU6183	0	0	0	0	0	0	0	0	0	1	0	0	0	0	0	0	1	0	0	0	2
d__Bacteria	k__norank_d__Bacteria	p__Proteobacteria	c__Alphaproteobacteria	o__Rhizobiales	f__Rhizobiaceae	g__Pseudaminobacter	s__uncultured_bacterium_g__Pseudaminobacter	OTU2739	23	15	29	27	16	58	21	15	10	11	1	0	1	5	2	2	3	0	6	3	248
d__Bacteria	k__norank_d__Bacteria	p__Patescibacteria	c__Berkelbacteria	o__norank_c__Berkelbacteria	f__norank_o__norank_c__Berkelbacteria	g__norank_f__norank_o__norank_c__Berkelbacteria	s__unclassified_g__norank_f__norank_o__norank_c__Berkelbacteria	OTU3339	0	0	0	0	0	0	2	0	3	0	0	0	0	0	0	0	1	0	0	0	6
d__Bacteria	k__norank_d__Bacteria	p__Chloroflexi	c__Anaerolineae	o__SBR1031	f__A4b	g__norank_f__A4b	s__unclassified_g__norank_f__A4b	OTU4538	12	13	28	4	3	2	11	14	0	3	0	0	1	1	0	0	0	0	0	0	92
d__Bacteria	k__norank_d__Bacteria	p__Patescibacteria	c__Gracilibacteria	o__Candidatus_Peribacteria	f__norank_o__Candidatus_Peribacteria	g__norank_f__norank_o__Candidatus_Peribacteria	s__unclassified_g__norank_f__norank_o__Candidatus_Peribacteria	OTU6273	1	0	0	0	0	0	0	0	0	1	0	0	0	0	0	0	0	0	0	1	3
d__Bacteria	k__norank_d__Bacteria	p__Desulfobacterota	c__Desulfobacteria	o__Desulfobacterales	f__Desulfococcaceae	g__Desulfococcus	s__Desulfococcus_multivorans	OTU6088	0	10	0	8	15	2	7	13	8	9	1	0	0	0	0	0	0	0	0	0	73
d__Bacteria	k__norank_d__Bacteria	p__Bacteroidota	c__Bacteroidia	o__Bacteroidales	f__Prolixibacteraceae	g__Roseimarinus	s__uncultured_bacterium_g__Roseimarinus	OTU1445	0	2	3	1	0	0	0	0	0	0	0	0	0	0	0	0	0	0	0	0	6
d__Bacteria	k__norank_d__Bacteria	p__Chloroflexi	c__Anaerolineae	o__norank_c__Anaerolineae	f__norank_o__norank_c__Anaerolineae	g__norank_f__norank_o__norank_c__Anaerolineae	s__uncultured_bacterium_g__norank_f__norank_o__norank_c__Anaerolineae	OTU5214	0	0	1	0	0	0	2	1	10	0	0	0	0	0	0	0	0	0	1	0	15
d__Bacteria	k__norank_d__Bacteria	p__Proteobacteria	c__Alphaproteobacteria	o__Reyranellales	f__Reyranellaceae	g__norank_f__Reyranellaceae	s__uncultured_Alphaproteobacteria_bacterium_g__norank_f__Reyranellaceae	OTU3772	45	14	12	14	22	57	27	51	2	27	1	0	1	1	0	0	3	2	3	2	284
d__Bacteria	k__norank_d__Bacteria	p__Chloroflexi	c__Ktedonobacteria	o__C0119	f__norank_o__C0119	g__norank_f__norank_o__C0119	s__uncultured_Thermobaculum_sp.	OTU5387	0	0	0	0	0	2	0	0	4	1	0	0	0	0	0	0	0	0	0	0	7
d__Bacteria	k__norank_d__Bacteria	p__Chloroflexi	c__Anaerolineae	o__SBR1031	f__norank_o__SBR1031	g__norank_f__norank_o__SBR1031	s__uncultured_bacterium_SJA-101	OTU3626	0	1	0	0	0	0	2	0	1	0	0	0	0	0	0	0	0	0	0	0	4
d__Bacteria	k__norank_d__Bacteria	p__Cyanobacteria	c__Cyanobacteriia	o__Chloroplast	f__norank_o__Chloroplast	g__norank_f__norank_o__Chloroplast	s__Chlorophyta_symbiont_of_Lubomirskia_sp.	OTU6921	1	3	0	0	0	0	0	0	0	1	3	15	4	1	7	0	7	1	1	5	49
d__Bacteria	k__norank_d__Bacteria	p__Firmicutes	c__Clostridia	o__Lachnospirales	f__Lachnospiraceae	g__unclassified_f__Lachnospiraceae	s__unclassified_f__Lachnospiraceae	OTU2221	2	11	9	8	3	62	11	8	7	14	1	1	1	2	1	0	1	2	4	3	151
d__Bacteria	k__norank_d__Bacteria	p__Proteobacteria	c__Alphaproteobacteria	o__Defluviicoccales	f__Defluviicoccaceae	g__Defluviicoccus	s__uncultured_bacterium_g__Defluviicoccus	OTU3807	0	0	0	0	0	0	1	0	0	0	0	0	0	0	0	0	0	0	0	0	1
d__Bacteria	k__norank_d__Bacteria	p__Proteobacteria	c__Alphaproteobacteria	o__Tistrellales	f__Geminicoccaceae	g__Candidatus_Alysiosphaera	s__uncultured_bacterium_g__Candidatus_Alysiosphaera	OTU5512	1	0	0	0	0	0	1	0	1	0	0	0	0	0	0	0	0	0	0	0	3
d__Bacteria	k__norank_d__Bacteria	p__Bacteroidota	c__Kapabacteria	o__Kapabacteriales	f__norank_o__Kapabacteriales	g__norank_f__norank_o__Kapabacteriales	s__uncultured_bacterium_g__norank_f__norank_o__Kapabacteriales	OTU3690	0	1	0	0	0	0	2	0	0	0	0	0	0	0	0	0	0	0	0	0	3
d__Bacteria	k__norank_d__Bacteria	p__Cyanobacteria	c__Vampirivibrionia	o__Vampirovibrionales	f__norank_o__Vampirovibrionales	g__norank_f__norank_o__Vampirovibrionales	s__unclassified_g__norank_f__norank_o__Vampirovibrionales	OTU3106	0	0	0	0	0	1	0	0	0	0	0	0	0	0	0	0	0	0	0	0	1
d__Bacteria	k__norank_d__Bacteria	p__Proteobacteria	c__Gammaproteobacteria	o__Alteromonadales	f__Shewanellaceae	g__Shewanella	s__Shewanella_sp._MR-7	OTU7831	0	0	0	0	0	0	0	0	0	0	0	0	0	0	0	2	2	0	0	4	8
d__Bacteria	k__norank_d__Bacteria	p__Proteobacteria	c__Alphaproteobacteria	o__Micavibrionales	f__Micavibrionaceae	g__norank_f__Micavibrionaceae	s__uncultured_bacterium_g__norank_f__Micavibrionaceae	OTU7368	0	0	1	0	0	0	0	0	0	0	0	0	0	0	0	0	0	0	0	0	1
d__Bacteria	k__norank_d__Bacteria	p__Chloroflexi	c__Anaerolineae	o__ADurb.Bin180	f__norank_o__ADurb.Bin180	g__norank_f__norank_o__ADurb.Bin180	s__uncultured_bacterium_g__norank_f__norank_o__ADurb.Bin180	OTU5001	0	2	0	4	2	1	0	2	3	1	0	0	0	0	0	0	0	0	0	0	15
d__Bacteria	k__norank_d__Bacteria	p__Firmicutes	c__Clostridia	o__Clostridiales	f__Clostridiaceae	g__Clostridium_sensu_stricto_12	s__Clostridium_magnum	OTU5517	10	3	7	30	8	9	7	5	16	3	0	0	0	0	0	0	0	0	1	0	99
d__Bacteria	k__norank_d__Bacteria	p__Proteobacteria	c__Gammaproteobacteria	o__Acidiferrobacterales	f__Acidiferrobacteraceae	g__Sulfurifustis	s__Sulfuricaulis_limicola	OTU1847	13	17	7	23	56	14	7	13	22	11	0	0	0	0	1	0	0	0	3	0	187
d__Bacteria	k__norank_d__Bacteria	p__Chloroflexi	c__Anaerolineae	o__SJA-15	f__norank_o__SJA-15	g__norank_f__norank_o__SJA-15	s__uncultured_bacterium_g__norank_f__norank_o__SJA-15	OTU4467	2	1	4	1	3	4	9	3	6	5	0	0	0	0	0	0	0	0	0	0	38
d__Bacteria	k__norank_d__Bacteria	p__Proteobacteria	c__Alphaproteobacteria	o__Tistrellales	f__Geminicoccaceae	g__Candidatus_Alysiosphaera	s__metagenome_g__Candidatus_Alysiosphaera	OTU1962	0	2	0	0	1	1	1	1	0	0	0	0	0	0	0	0	0	0	0	0	6
d__Bacteria	k__norank_d__Bacteria	p__Cyanobacteria	c__Cyanobacteriia	o__Chloroplast	f__norank_o__Chloroplast	g__norank_f__norank_o__Chloroplast	s__unclassified_g__norank_f__norank_o__Chloroplast	OTU6922	0	0	0	0	0	0	0	0	0	0	1	2	0	0	0	0	0	0	0	0	3
d__Bacteria	k__norank_d__Bacteria	p__Proteobacteria	c__Gammaproteobacteria	o__Burkholderiales	f__Nitrosomonadaceae	g__GOUTA6	s__unclassified_g__GOUTA6	OTU2289	0	0	0	0	0	0	1	1	0	0	0	0	0	0	0	0	0	0	0	0	2
d__Bacteria	k__norank_d__Bacteria	p__Chloroflexi	c__Chloroflexia	o__Thermomicrobiales	f__JG30-KF-CM45	g__norank_f__JG30-KF-CM45	s__unclassified_g__norank_f__JG30-KF-CM45	OTU4891	0	1	0	0	0	0	1	1	0	0	0	0	0	0	0	0	0	0	0	0	3
d__Bacteria	k__norank_d__Bacteria	p__Acidobacteriota	c__Thermoanaerobaculia	o__Thermoanaerobaculales	f__Thermoanaerobaculaceae	g__TPD-58	s__uncultured_bacterium_g__TPD-58	OTU4637	0	1	1	1	0	0	1	0	0	0	0	0	0	0	0	0	0	0	0	0	4
d__Bacteria	k__norank_d__Bacteria	p__Desulfobacterota	c__Syntrophobacteria	o__Syntrophobacterales	f__Syntrophobacteraceae	g__Syntrophobacter	s__uncultured_soil_bacterium_g__Syntrophobacter	OTU6247	1	13	2	11	8	2	19	12	70	12	0	0	0	0	0	0	0	0	0	0	150
d__Bacteria	k__norank_d__Bacteria	p__Cyanobacteria	c__Cyanobacteriia	o__Chloroplast	f__norank_o__Chloroplast	g__norank_f__norank_o__Chloroplast	s__Synura_petersenii	OTU7456	0	0	0	0	0	0	0	0	0	0	29	50	8	5	19	0	0	0	0	0	111
d__Bacteria	k__norank_d__Bacteria	p__Proteobacteria	c__Alphaproteobacteria	o__Sphingomonadales	f__Sphingomonadaceae	g__Sphingomonas	s__metagenome_g__Sphingomonas	OTU1787	2	1	3	5	17	0	4	4	1	1	1	0	0	0	1	1	1	0	1	0	43
d__Bacteria	k__norank_d__Bacteria	p__Firmicutes	c__Clostridia	o__Peptostreptococcales-Tissierellales	f__Anaerovoracaceae	g__norank_f__Anaerovoracaceae	s__uncultured_bacterium_g__norank_f__Anaerovoracaceae	OTU475	1	0	0	1	0	0	0	0	0	0	0	0	0	0	0	0	0	0	0	0	2
d__Bacteria	k__norank_d__Bacteria	p__Spirochaetota	c__Spirochaetia	o__Spirochaetales	f__Spirochaetaceae	g__norank_f__Spirochaetaceae	s__unclassified_g__norank_f__Spirochaetaceae	OTU3803	0	0	0	1	0	0	0	0	0	0	0	0	0	0	0	0	0	0	0	0	1
d__Bacteria	k__norank_d__Bacteria	p__Cyanobacteria	c__Cyanobacteriia	o__Chloroplast	f__norank_o__Chloroplast	g__norank_f__norank_o__Chloroplast	s__Lepocinclis_sp._Saema103108C	OTU8239	0	0	0	0	0	0	0	0	0	0	1	2	1	0	0	2	1	0	7	0	14
d__Bacteria	k__norank_d__Bacteria	p__Proteobacteria	c__Gammaproteobacteria	o__Pseudomonadales	f__Moraxellaceae	g__Psychrobacter	s__Psychrobacter_cibarius	OTU7724	0	0	0	0	0	0	0	0	0	0	0	0	0	0	0	0	0	1	0	0	1
d__Bacteria	k__norank_d__Bacteria	p__Patescibacteria	c__Berkelbacteria	o__norank_c__Berkelbacteria	f__norank_o__norank_c__Berkelbacteria	g__norank_f__norank_o__norank_c__Berkelbacteria	s__Candidatus_Berkelbacteria_bacterium_RIFOXYA2_FULL_43_10	OTU4147	0	0	0	0	1	0	1	0	0	0	0	0	0	0	0	0	0	0	0	0	2
d__Bacteria	k__norank_d__Bacteria	p__Actinobacteriota	c__MB-A2-108	o__norank_c__MB-A2-108	f__norank_o__norank_c__MB-A2-108	g__norank_f__norank_o__norank_c__MB-A2-108	s__unclassified_g__norank_f__norank_o__norank_c__MB-A2-108	OTU3818	1	1	1	1	0	4	7	1	0	2	0	1	0	4	0	0	0	0	0	0	23
d__Bacteria	k__norank_d__Bacteria	p__Proteobacteria	c__Alphaproteobacteria	o__Rickettsiales	f__SM2D12	g__norank_f__SM2D12	s__uncultured_Alphaproteobacteria_bacterium_g__norank_f__SM2D12	OTU8829	0	1	0	0	0	0	0	0	0	0	0	0	0	0	0	0	0	0	0	0	1
d__Bacteria	k__norank_d__Bacteria	p__Myxococcota	c__Polyangia	o__unclassified_c__Polyangia	f__unclassified_c__Polyangia	g__unclassified_c__Polyangia	s__unclassified_c__Polyangia	OTU5774	0	0	0	0	0	1	0	1	0	2	0	0	0	0	0	0	0	0	0	0	4
d__Bacteria	k__norank_d__Bacteria	p__Actinobacteriota	c__Actinobacteria	o__PeM15	f__norank_o__PeM15	g__norank_f__norank_o__PeM15	s__unclassified_g__norank_f__norank_o__PeM15	OTU1001	23	16	52	55	21	4	24	16	4	27	6	3	0	1	1	0	1	2	1	1	258
d__Bacteria	k__norank_d__Bacteria	p__Spirochaetota	c__Spirochaetia	o__Spirochaetales	f__Spirochaetaceae	g__Spirochaeta_2	s__uncultured_prokaryote_g__Spirochaeta_2	OTU3389	0	2	2	2	0	0	2	0	0	0	1	0	0	0	0	0	0	0	0	0	9
d__Bacteria	k__norank_d__Bacteria	p__Proteobacteria	c__Gammaproteobacteria	o__Methylococcales	f__Methylococcaceae	g__Methyloparacoccus	s__uncultured_bacterium_g__Methyloparacoccus	OTU557	0	0	1	1	0	0	0	0	0	0	0	0	0	0	0	0	0	0	0	0	2
d__Bacteria	k__norank_d__Bacteria	p__Cyanobacteria	c__Cyanobacteriia	o__Oxyphotobacteria_Incertae_Sedis	f__unclassified_o__Oxyphotobacteria_Incertae_Sedis	g__unclassified_o__Oxyphotobacteria_Incertae_Sedis	s__unclassified_o__Oxyphotobacteria_Incertae_Sedis	OTU5768	1	0	0	0	0	0	0	3	0	4	0	0	0	0	0	0	0	0	0	0	8
d__Bacteria	k__norank_d__Bacteria	p__Proteobacteria	c__Alphaproteobacteria	o__Ferrovibrionales	f__Ferrovibrionaceae	g__Ferrovibrio	s__uncultured_bacterium_g__Ferrovibrio	OTU8802	2	3	0	0	6	1	0	1	0	1	0	0	0	0	1	0	1	0	3	5	24
d__Bacteria	k__norank_d__Bacteria	p__Dependentiae	c__Babeliae	o__Babeliales	f__norank_o__Babeliales	g__norank_f__norank_o__Babeliales	s__uncultured_Candidatus_Dependentiae_bacterium_g__norank_f__norank	OTU8920	0	0	0	0	0	0	0	0	0	0	0	0	0	0	0	0	0	0	0	1	1
d__Bacteria	k__norank_d__Bacteria	p__Patescibacteria	c__Berkelbacteria	o__norank_c__Berkelbacteria	f__norank_o__norank_c__Berkelbacteria	g__norank_f__norank_o__norank_c__Berkelbacteria	s__unclassified_g__norank_f__norank_o__norank_c__Berkelbacteria	OTU2316	0	0	1	0	2	1	0	0	0	0	1	0	0	1	0	0	1	1	0	0	8
d__Bacteria	k__norank_d__Bacteria	p__Gemmatimonadota	c__Gemmatimonadetes	o__Gemmatimonadales	f__Gemmatimonadaceae	g__norank_f__Gemmatimonadaceae	s__uncultured_prokaryote_g__norank_f__Gemmatimonadaceae	OTU5854	13	15	3	5	9	1	21	22	5	25	0	0	0	0	1	1	3	1	7	6	138
d__Bacteria	k__norank_d__Bacteria	p__Chloroflexi	c__Anaerolineae	o__SBR1031	f__A4b	g__norank_f__A4b	s__unclassified_g__norank_f__A4b	OTU2385	0	0	0	0	1	8	6	1	0	0	0	0	0	0	0	0	0	0	0	0	16
d__Bacteria	k__norank_d__Bacteria	p__Gemmatimonadota	c__Longimicrobia	o__Longimicrobiales	f__Longimicrobiaceae	g__norank_f__Longimicrobiaceae	s__uncultured_bacterium_g__norank_f__Longimicrobiaceae	OTU2623	0	0	0	0	0	3	0	0	0	0	0	0	0	0	0	0	0	0	0	0	3
d__Bacteria	k__norank_d__Bacteria	p__Chloroflexi	c__Anaerolineae	o__RBG-13-54-9	f__norank_o__RBG-13-54-9	g__norank_f__norank_o__RBG-13-54-9	s__metagenome_g__norank_f__norank_o__RBG-13-54-9	OTU6268	5	9	32	6	17	4	21	15	10	17	0	0	0	1	0	0	0	0	0	0	137
d__Bacteria	k__norank_d__Bacteria	p__Actinobacteriota	c__Thermoleophilia	o__Gaiellales	f__norank_o__Gaiellales	g__norank_f__norank_o__Gaiellales	s__metagenome_g__norank_f__norank_o__Gaiellales	OTU6777	0	0	0	0	0	0	0	0	2	0	23	18	8	9	18	5	11	2	2	5	103
d__Bacteria	k__norank_d__Bacteria	p__Actinobacteriota	c__Actinobacteria	o__Micrococcales	f__Jonesiaceae	g__Jonesia	s__unclassified_g__Jonesia	OTU426	4	6	31	7	0	0	0	0	0	0	0	0	1	0	0	0	0	0	0	0	49
d__Bacteria	k__norank_d__Bacteria	p__Chloroflexi	c__Anaerolineae	o__SBR1031	f__A4b	g__norank_f__A4b	s__uncultured_bacterium_g__norank_f__A4b	OTU1124	2	4	2	0	5	2	3	4	0	7	0	0	0	2	0	0	1	0	0	0	32
d__Bacteria	k__norank_d__Bacteria	p__Patescibacteria	c__Parcubacteria	o__Candidatus_Moranbacteria	f__norank_o__Candidatus_Moranbacteria	g__norank_f__norank_o__Candidatus_Moranbacteria	s__unclassified_g__norank_f__norank_o__Candidatus_Moranbacteria	OTU2593	0	0	0	0	0	0	0	0	0	0	0	0	1	0	0	0	0	0	0	0	1
d__Bacteria	k__norank_d__Bacteria	p__unclassified_k__norank_d__Bacteria	c__unclassified_k__norank_d__Bacteria	o__unclassified_k__norank_d__Bacteria	f__unclassified_k__norank_d__Bacteria	g__unclassified_k__norank_d__Bacteria	s__unclassified_k__norank_d__Bacteria	OTU8298	0	0	0	1	3	1	0	0	3	0	0	0	0	0	0	0	0	0	0	0	8
d__Bacteria	k__norank_d__Bacteria	p__Proteobacteria	c__Alphaproteobacteria	o__Rhizobiales	f__A0839	g__norank_f__A0839	s__uncultured_bacterium_g__norank_f__A0839	OTU4416	8	4	4	6	1	2	4	11	1	1	0	0	0	0	0	0	0	0	0	0	42
d__Bacteria	k__norank_d__Bacteria	p__Patescibacteria	c__Parcubacteria	o__Candidatus_Kaiserbacteria	f__norank_o__Candidatus_Kaiserbacteria	g__norank_f__norank_o__Candidatus_Kaiserbacteria	s__unclassified_g__norank_f__norank_o__Candidatus_Kaiserbacteria	OTU8212	0	0	0	0	0	0	0	0	0	0	0	0	0	0	0	1	0	2	3	3	9
d__Bacteria	k__norank_d__Bacteria	p__Patescibacteria	c__Parcubacteria	o__Candidatus_Kaiserbacteria	f__norank_o__Candidatus_Kaiserbacteria	g__norank_f__norank_o__Candidatus_Kaiserbacteria	s__unclassified_g__norank_f__norank_o__Candidatus_Kaiserbacteria	OTU8213	0	1	0	1	5	0	1	0	0	0	1	0	0	0	1	2	0	4	1	0	17
d__Bacteria	k__norank_d__Bacteria	p__Proteobacteria	c__Alphaproteobacteria	o__norank_c__Alphaproteobacteria	f__norank_o__norank_c__Alphaproteobacteria	g__norank_f__norank_o__norank_c__Alphaproteobacteria	s__uncultured_bacterium_g__norank_f__norank_o__norank_c__Alphaproteobacteria	OTU2434	2	0	1	0	1	3	0	0	0	0	0	0	0	0	0	0	0	0	0	0	7
d__Bacteria	k__norank_d__Bacteria	p__Patescibacteria	c__Dojkabacteria	o__norank_c__Dojkabacteria	f__norank_o__norank_c__Dojkabacteria	g__norank_f__norank_o__norank_c__Dojkabacteria	s__uncultured_eubacterium_WCHB1-06	OTU1544	0	0	2	6	0	0	0	0	0	0	1	0	0	0	1	0	1	0	0	0	11
d__Bacteria	k__norank_d__Bacteria	p__Desulfobacterota	c__Syntrophia	o__Syntrophales	f__unclassified_o__Syntrophales	g__unclassified_o__Syntrophales	s__unclassified_o__Syntrophales	OTU5491	0	1	0	0	0	0	0	0	3	0	0	0	0	0	0	0	0	0	0	0	4
d__Bacteria	k__norank_d__Bacteria	p__Proteobacteria	c__Alphaproteobacteria	o__Rhizobiales	f__Xanthobacteraceae	g__Ancylobacter	s__Ancylobacter_polymorphus	OTU2695	1	1	2	0	0	16	1	0	1	1	1	0	1	1	1	4	4	2	3	2	42
d__Bacteria	k__norank_d__Bacteria	p__Bacteroidota	c__Bacteroidia	o__Chitinophagales	f__Saprospiraceae	g__norank_f__Saprospiraceae	s__unclassified_g__norank_f__Saprospiraceae	OTU720	0	4	0	0	0	0	1	1	0	0	0	0	0	0	0	0	0	0	0	0	6
d__Bacteria	k__norank_d__Bacteria	p__Bacteroidota	c__Bacteroidia	o__Flavobacteriales	f__NS9_marine_group	g__norank_f__NS9_marine_group	s__unclassified_g__norank_f__NS9_marine_group	OTU6693	0	0	0	0	0	0	0	0	0	0	1	2	3	1	0	0	0	2	0	0	9
d__Bacteria	k__norank_d__Bacteria	p__unclassified_k__norank_d__Bacteria	c__unclassified_k__norank_d__Bacteria	o__unclassified_k__norank_d__Bacteria	f__unclassified_k__norank_d__Bacteria	g__unclassified_k__norank_d__Bacteria	s__unclassified_k__norank_d__Bacteria	OTU2482	0	0	0	0	0	7	0	0	0	0	0	0	0	0	0	0	0	0	0	0	7
d__Bacteria	k__norank_d__Bacteria	p__Bdellovibrionota	c__Bdellovibrionia	o__Bdellovibrionales	f__Bdellovibrionaceae	g__Bdellovibrio	s__uncultured_bacterium_g__Bdellovibrio	OTU1408	1	0	0	1	1	3	1	0	0	0	0	0	1	0	1	0	0	0	0	0	9
d__Bacteria	k__norank_d__Bacteria	p__Latescibacterota	c__norank_p__Latescibacterota	o__norank_c__norank_p__Latescibacterota	f__norank_o__norank_c__norank_p__Latescibacterota	g__norank_f__norank_o__norank_c__norank_p__Latescibacterota	s__uncultured_soil_bacterium_PBS-III-30	OTU5629	0	0	0	0	0	2	1	1	4	0	0	0	0	0	0	0	0	0	0	0	8
d__Bacteria	k__norank_d__Bacteria	p__Acidobacteriota	c__Holophagae	o__Holophagales	f__Holophagaceae	g__unclassified_f__Holophagaceae	s__unclassified_f__Holophagaceae	OTU3446	0	1	0	0	0	0	1	2	0	2	0	0	0	0	0	0	0	0	0	1	7
d__Bacteria	k__norank_d__Bacteria	p__Actinobacteriota	c__Actinobacteria	o__Propionibacteriales	f__Propionibacteriaceae	g__Luteococcus	s__uncultured_bacterium_g__Luteococcus	OTU1609	1	0	0	2	0	0	1	0	0	0	0	0	0	0	0	0	0	0	0	0	4
d__Bacteria	k__norank_d__Bacteria	p__unclassified_k__norank_d__Bacteria	c__unclassified_k__norank_d__Bacteria	o__unclassified_k__norank_d__Bacteria	f__unclassified_k__norank_d__Bacteria	g__unclassified_k__norank_d__Bacteria	s__unclassified_k__norank_d__Bacteria	OTU4627	0	0	0	0	0	1	2	3	2	0	0	0	0	0	0	0	0	0	0	0	8
d__Bacteria	k__norank_d__Bacteria	p__Proteobacteria	c__Gammaproteobacteria	o__Methylococcales	f__Methylococcaceae	g__Methylocaldum	s__unclassified_g__Methylocaldum	OTU5648	0	0	1	0	1	0	0	0	2	0	0	0	0	0	0	0	0	0	0	0	4
d__Bacteria	k__norank_d__Bacteria	p__Fibrobacterota	c__Fibrobacteria	o__Fibrobacterales	f__B5-096	g__norank_f__B5-096	s__unclassified_g__norank_f__B5-096	OTU4714	0	1	0	0	0	0	3	0	0	0	0	0	0	0	0	0	0	0	0	0	4
d__Bacteria	k__norank_d__Bacteria	p__Chloroflexi	c__Anaerolineae	o__SBR1031	f__A4b	g__norank_f__A4b	s__unclassified_g__norank_f__A4b	OTU2406	4	4	2	0	3	1	1	2	0	3	0	0	0	0	0	0	0	0	0	0	20
d__Bacteria	k__norank_d__Bacteria	p__unclassified_k__norank_d__Bacteria	c__unclassified_k__norank_d__Bacteria	o__unclassified_k__norank_d__Bacteria	f__unclassified_k__norank_d__Bacteria	g__unclassified_k__norank_d__Bacteria	s__unclassified_k__norank_d__Bacteria	OTU3242	0	0	0	0	0	0	2	0	0	0	0	0	0	0	0	0	0	0	0	0	2
d__Bacteria	k__norank_d__Bacteria	p__Proteobacteria	c__Alphaproteobacteria	o__Sphingomonadales	f__Sphingomonadaceae	g__Novosphingobium	s__unclassified_g__Novosphingobium	OTU8768	34	29	103	68	88	21	74	189	8	28	318	227	179	365	283	1743	1757	1600	1805	1781	10700
d__Bacteria	k__norank_d__Bacteria	p__Chloroflexi	c__Anaerolineae	o__SBR1031	f__A4b	g__norank_f__A4b	s__unclassified_g__norank_f__A4b	OTU4123	0	1	0	2	6	2	0	2	0	1	0	0	0	0	0	0	0	0	0	0	14
d__Bacteria	k__norank_d__Bacteria	p__Proteobacteria	c__Gammaproteobacteria	o__Burkholderiales	f__Methylophilaceae	g__Candidatus_Methylopumilus	s__uncultured_bacterium_g__Candidatus_Methylopumilus	OTU6751	0	0	0	0	0	0	0	0	0	0	25	22	25	19	26	0	1	5	7	1	131
d__Bacteria	k__norank_d__Bacteria	p__Firmicutes	c__Bacilli	o__Izemoplasmatales	f__Izemoplasmataceae	g__norank_f__Izemoplasmataceae	s__uncultured_bacterium_g__norank_f__Izemoplasmataceae	OTU7002	0	0	0	1	0	0	0	0	0	0	0	0	2	1	0	0	0	0	0	0	4
d__Bacteria	k__norank_d__Bacteria	p__Zixibacteria	c__norank_p__Zixibacteria	o__norank_c__norank_p__Zixibacteria	f__norank_o__norank_c__norank_p__Zixibacteria	g__norank_f__norank_o__norank_c__norank_p__Zixibacteria	s__bioreactor_metagenome_g__norank_f__norank	OTU5246	0	4	1	2	3	5	1	0	4	1	0	0	0	0	0	0	0	0	0	0	21
d__Bacteria	k__norank_d__Bacteria	p__Actinobacteriota	c__Coriobacteriia	o__OPB41	f__norank_o__OPB41	g__norank_f__norank_o__OPB41	s__uncultured_Coriobacteriaceae_bacterium_g__norank_f__norank	OTU940	2	2	2	0	3	2	8	2	4	6	0	0	0	0	0	0	0	0	1	0	32
d__Bacteria	k__norank_d__Bacteria	p__Verrucomicrobiota	c__Chlamydiae	o__Chlamydiales	f__Parachlamydiaceae	g__Neochlamydia	s__uncultured_bacterium_g__Neochlamydia	OTU4799	2	0	1	0	0	0	0	0	0	0	0	0	0	0	1	0	0	0	0	0	4
d__Bacteria	k__norank_d__Bacteria	p__Bdellovibrionota	c__Bdellovibrionia	o__Bdellovibrionales	f__Bdellovibrionaceae	g__Bdellovibrio	s__unclassified_g__Bdellovibrio	OTU6675	1	1	9	2	0	0	0	1	0	0	1	0	1	1	0	0	0	0	1	1	19
d__Bacteria	k__norank_d__Bacteria	p__Acidobacteriota	c__Vicinamibacteria	o__Vicinamibacterales	f__Vicinamibacteraceae	g__norank_f__Vicinamibacteraceae	s__uncultured_Acidobacteria_bacterium_g__norank_f__Vicinamibacteraceae	OTU177	4	0	0	0	1	0	0	0	0	0	0	0	0	0	0	0	0	0	0	0	5
d__Bacteria	k__norank_d__Bacteria	p__Bacteroidota	c__Kryptonia	o__Kryptoniales	f__BSV26	g__norank_f__BSV26	s__unclassified_g__norank_f__BSV26	OTU3037	1	1	0	0	0	1	2	0	12	2	0	0	0	0	0	0	0	0	0	0	19
d__Bacteria	k__norank_d__Bacteria	p__Bacteroidota	c__Bacteroidia	o__Bacteroidales	f__Bacteroidetes_vadinHA17	g__norank_f__Bacteroidetes_vadinHA17	s__uncultured_bacterium_g__norank_f__Bacteroidetes_vadinHA17	OTU1679	0	0	0	1	2	0	1	0	3	0	0	0	0	0	0	0	0	0	1	0	8
d__Bacteria	k__norank_d__Bacteria	p__Patescibacteria	c__Kazania	o__norank_c__Kazania	f__norank_o__norank_c__Kazania	g__norank_f__norank_o__norank_c__Kazania	s__uncultured_bacterium_g__norank_f__norank_o__norank_c__Kazania	OTU7167	0	0	0	0	0	0	0	0	0	0	0	0	0	1	0	0	0	0	0	1	2
d__Bacteria	k__norank_d__Bacteria	p__SAR324_cladeMarine_group_B	c__norank_p__SAR324_cladeMarine_group_B	o__norank_c__norank_p__SAR324_cladeMarine_group_B	f__norank_o__norank_c__norank_p__SAR324_cladeMarine_group_B	g__norank_f__norank_o__norank_c__norank_p__SAR324_cladeMarine_group_B	s__Candidatus_Nitrosoarchaeum_limnia_SFB1_g__norank_f__norank_o__norank	OTU2478	0	0	0	0	0	1	0	0	0	0	0	0	0	0	0	0	0	0	0	0	1
d__Bacteria	k__norank_d__Bacteria	p__Chloroflexi	c__Chloroflexia	o__Thermomicrobiales	f__AKYG1722	g__norank_f__AKYG1722	s__unclassified_g__norank_f__AKYG1722	OTU4513	0	0	1	0	0	5	0	1	0	0	0	0	0	0	0	0	0	0	0	0	7
d__Bacteria	k__norank_d__Bacteria	p__Chloroflexi	c__Anaerolineae	o__SBR1031	f__A4b	g__norank_f__A4b	s__uncultured_bacterium_g__norank_f__A4b	OTU3441	4	4	0	0	0	1	1	3	0	0	0	0	0	0	0	0	0	0	0	0	13
d__Bacteria	k__norank_d__Bacteria	p__Chloroflexi	c__Anaerolineae	o__SBR1031	f__norank_o__SBR1031	g__norank_f__norank_o__SBR1031	s__unclassified_g__norank_f__norank_o__SBR1031	OTU363	15	7	2	0	9	9	1	2	0	3	0	0	0	0	0	0	0	0	0	0	48
d__Bacteria	k__norank_d__Bacteria	p__Proteobacteria	c__Alphaproteobacteria	o__Rickettsiales	f__Mitochondria	g__norank_f__Mitochondria	s__Alphaproteobacteria_bacterium_RIFCSPLOWO2_01_FULL_40_26	OTU7597	0	0	0	0	0	0	0	0	0	0	0	0	0	0	0	0	0	1	0	0	1
d__Bacteria	k__norank_d__Bacteria	p__Nitrospinota	c__P9X2b3D02	o__norank_c__P9X2b3D02	f__norank_o__norank_c__P9X2b3D02	g__norank_f__norank_o__norank_c__P9X2b3D02	s__unclassified_g__norank_f__norank_o__norank_c__P9X2b3D02	OTU4651	0	0	0	0	0	0	0	1	0	0	0	0	0	0	0	0	0	0	0	0	1
d__Bacteria	k__norank_d__Bacteria	p__Sva0485	c__norank_p__Sva0485	o__norank_c__norank_p__Sva0485	f__norank_o__norank_c__norank_p__Sva0485	g__norank_f__norank_o__norank_c__norank_p__Sva0485	s__unclassified_g__norank_f__norank_o__norank_c__norank_p__Sva0485	OTU2013	1	1	2	1	0	1	1	0	5	0	0	0	0	0	0	0	0	0	0	0	12
d__Bacteria	k__norank_d__Bacteria	p__Patescibacteria	c__Parcubacteria	o__Candidatus_Kaiserbacteria	f__norank_o__Candidatus_Kaiserbacteria	g__norank_f__norank_o__Candidatus_Kaiserbacteria	s__uncultured_bacterium_g__norank_f__norank_o__Candidatus_Kaiserbacteria	OTU6736	1	0	0	0	0	0	0	0	0	0	2	0	0	0	0	0	0	0	0	2	5
d__Bacteria	k__norank_d__Bacteria	p__Synergistota	c__Synergistia	o__Synergistales	f__Synergistaceae	g__Aminobacterium	s__uncultured_bacterium_g__Aminobacterium	OTU5419	0	0	0	1	0	0	0	1	2	0	0	0	0	0	0	1	0	0	0	0	5
d__Bacteria	k__norank_d__Bacteria	p__Acidobacteriota	c__Blastocatellia	o__Blastocatellales	f__Blastocatellaceae	g__JGI_0001001-H03	s__uncultured_bacterium_g__JGI_0001001-H03	OTU4608	4	1	4	1	8	0	0	0	0	0	0	0	0	2	0	0	0	0	0	0	20
d__Bacteria	k__norank_d__Bacteria	p__Verrucomicrobiota	c__Verrucomicrobiae	o__Chthoniobacterales	f__norank_o__Chthoniobacterales	g__norank_f__norank_o__Chthoniobacterales	s__uncultured_bacterium_g__norank_f__norank_o__Chthoniobacterales	OTU1026	0	1	1	0	0	0	0	0	0	0	0	0	0	0	0	0	0	0	0	0	2
d__Bacteria	k__norank_d__Bacteria	p__Bacteroidota	c__Bacteroidia	o__Bacteroidales	f__Prevotellaceae	g__Prevotella	s__Prevotella_paludivivens	OTU8930	0	0	1	0	4	0	0	0	0	0	42	30	42	175	60	23	44	45	55	91	612
d__Bacteria	k__norank_d__Bacteria	p__Desulfobacterota	c__Desulfuromonadia	o__PB19	f__norank_o__PB19	g__norank_f__norank_o__PB19	s__uncultured_deep-sea_bacterium_g__norank_f__norank_o__PB19	OTU6234	0	1	0	0	0	0	2	0	0	0	0	0	0	0	0	0	0	0	0	0	3
d__Bacteria	k__norank_d__Bacteria	p__Proteobacteria	c__Gammaproteobacteria	o__Acidiferrobacterales	f__Acidiferrobacteraceae	g__Sulfurifustis	s__uncultured_gamma_proteobacterium_g__Sulfurifustis	OTU1782	0	0	0	0	4	0	0	0	0	0	0	0	0	0	0	0	0	0	0	0	4
d__Bacteria	k__norank_d__Bacteria	p__Desulfobacterota	c__Desulfobacteria	o__Desulfatiglandales	f__Desulfatiglandaceae	g__Desulfatiglans	s__unclassified_g__Desulfatiglans	OTU5285	6	3	6	3	13	1	3	9	26	5	0	1	0	0	0	0	0	0	0	0	76
d__Bacteria	k__norank_d__Bacteria	p__Dependentiae	c__Babeliae	o__Babeliales	f__norank_o__Babeliales	g__norank_f__norank_o__Babeliales	s__uncultured_delta_proteobacterium_g__norank_f__norank	OTU3281	0	0	0	0	0	1	0	0	0	0	0	0	0	0	0	0	0	0	0	0	1
d__Bacteria	k__norank_d__Bacteria	p__Chloroflexi	c__unclassified_p__Chloroflexi	o__unclassified_p__Chloroflexi	f__unclassified_p__Chloroflexi	g__unclassified_p__Chloroflexi	s__unclassified_p__Chloroflexi	OTU2683	0	0	0	0	1	5	0	0	0	0	0	0	0	0	0	0	0	0	0	0	6
d__Bacteria	k__norank_d__Bacteria	p__Chloroflexi	c__unclassified_p__Chloroflexi	o__unclassified_p__Chloroflexi	f__unclassified_p__Chloroflexi	g__unclassified_p__Chloroflexi	s__unclassified_p__Chloroflexi	OTU2682	0	0	0	0	0	12	0	0	0	0	0	0	0	0	0	0	0	0	0	0	12
d__Bacteria	k__norank_d__Bacteria	p__Proteobacteria	c__Alphaproteobacteria	o__Micavibrionales	f__norank_o__Micavibrionales	g__norank_f__norank_o__Micavibrionales	s__uncultured_bacterium_g__norank_f__norank_o__Micavibrionales	OTU8781	1	0	0	0	0	0	0	2	0	0	0	0	0	0	0	0	3	2	2	2	12
d__Bacteria	k__norank_d__Bacteria	p__Chloroflexi	c__Anaerolineae	o__unclassified_c__Anaerolineae	f__unclassified_c__Anaerolineae	g__unclassified_c__Anaerolineae	s__unclassified_c__Anaerolineae	OTU2850	0	0	0	0	0	2	0	0	0	0	0	0	0	0	0	0	0	0	0	0	2
d__Bacteria	k__norank_d__Bacteria	p__Bacteroidota	c__Bacteroidia	o__Sphingobacteriales	f__NS11-12_marine_group	g__norank_f__NS11-12_marine_group	s__uncultured_bacterium_g__norank_f__NS11-12_marine_group	OTU7295	0	0	0	0	0	0	0	0	0	0	15	12	13	17	22	10	8	12	7	3	119
d__Bacteria	k__norank_d__Bacteria	p__Chloroflexi	c__Anaerolineae	o__Ardenticatenales	f__norank_o__Ardenticatenales	g__norank_f__norank_o__Ardenticatenales	s__unclassified_g__norank_f__norank_o__Ardenticatenales	OTU5077	4	0	2	1	1	0	5	1	1	3	0	0	0	0	0	0	0	0	0	0	18
d__Bacteria	k__norank_d__Bacteria	p__Planctomycetota	c__Phycisphaerae	o__Phycisphaerales	f__Phycisphaeraceae	g__CL500-3	s__uncultured_bacterium_g__CL500-3	OTU7082	0	0	0	0	0	0	0	0	0	0	13	11	14	5	12	1	0	0	0	0	56
d__Bacteria	k__norank_d__Bacteria	p__Bacteroidota	c__Bacteroidia	o__Bacteroidales	f__Bacteroidaceae	g__Bacteroides	s__Bacteroides_graminisolvens	OTU8260	5	0	2	0	1	0	0	0	0	1	12	29	88	27	57	18	19	68	82	67	476
d__Bacteria	k__norank_d__Bacteria	p__Gemmatimonadota	c__Gemmatimonadetes	o__Gemmatimonadales	f__Gemmatimonadaceae	g__norank_f__Gemmatimonadaceae	s__uncultured_Gemmatimonadetes_bacterium_g__norank_f__Gemmatimonadaceae	OTU709	1	7	2	0	4	4	0	0	0	1	0	0	0	0	0	0	0	0	0	0	19
d__Bacteria	k__norank_d__Bacteria	p__Patescibacteria	c__Parcubacteria	o__unclassified_c__Parcubacteria	f__unclassified_c__Parcubacteria	g__unclassified_c__Parcubacteria	s__unclassified_c__Parcubacteria	OTU7815	0	0	0	0	0	0	0	0	0	0	0	0	0	0	0	0	1	1	0	1	3
d__Bacteria	k__norank_d__Bacteria	p__Sumerlaeota	c__Sumerlaeia	o__Sumerlaeales	f__Sumerlaeaceae	g__Sumerlaea	s__uncultured_organism_g__Sumerlaea	OTU2329	0	0	0	0	0	4	0	0	0	0	0	0	0	0	0	0	0	0	0	0	4
d__Bacteria	k__norank_d__Bacteria	p__Planctomycetota	c__Planctomycetes	o__Gemmatales	f__Gemmataceae	g__norank_f__Gemmataceae	s__unclassified_g__norank_f__Gemmataceae	OTU4590	2	0	0	0	0	0	0	1	0	0	1	0	0	0	0	0	0	0	0	0	4
d__Bacteria	k__norank_d__Bacteria	p__Proteobacteria	c__Gammaproteobacteria	o__Burkholderiales	f__Burkholderiaceae	g__Limnobacter	s__unclassified_g__Limnobacter	OTU8514	0	0	0	0	3	0	0	0	0	0	0	1	0	0	0	0	1	0	6	8	19
d__Bacteria	k__norank_d__Bacteria	p__Proteobacteria	c__Gammaproteobacteria	o__Methylococcales	f__Methylomonadaceae	g__Methylomonas	s__uncultured_bacterium_g__Methylomonas	OTU7187	0	2	10	1	0	0	0	0	0	1	2	6	2	2	3	1	1	2	3	4	40
d__Bacteria	k__norank_d__Bacteria	p__Acidobacteriota	c__Thermoanaerobaculia	o__Thermoanaerobaculales	f__Thermoanaerobaculaceae	g__Subgroup_10	s__unclassified_g__Subgroup_10	OTU2839	0	0	0	0	0	3	1	0	0	0	0	0	0	0	0	0	0	0	0	0	4
d__Bacteria	k__norank_d__Bacteria	p__Bacteroidota	c__Bacteroidia	o__Bacteroidales	f__SB-5	g__norank_f__SB-5	s__uncultured_bacterium_g__norank_f__SB-5	OTU692	2	2	0	0	0	0	0	0	0	0	0	0	0	0	0	0	0	0	0	0	4
d__Bacteria	k__norank_d__Bacteria	p__Chloroflexi	c__Chloroflexia	o__Chloroflexales	f__Roseiflexaceae	g__unclassified_f__Roseiflexaceae	s__unclassified_f__Roseiflexaceae	OTU4364	0	0	0	0	2	0	4	2	0	0	0	0	0	0	0	0	0	0	0	0	8
d__Bacteria	k__norank_d__Bacteria	p__Cyanobacteria	c__Vampirivibrionia	o__Gastranaerophilales	f__norank_o__Gastranaerophilales	g__norank_f__norank_o__Gastranaerophilales	s__uncultured_bacterium_g__norank_f__norank_o__Gastranaerophilales	OTU7233	0	0	0	0	0	0	0	0	0	0	0	0	2	1	0	0	0	0	0	0	3
d__Bacteria	k__norank_d__Bacteria	p__Chloroflexi	c__OLB14	o__norank_c__OLB14	f__norank_o__norank_c__OLB14	g__norank_f__norank_o__norank_c__OLB14	s__uncultured_bacterium_g__norank_f__norank_o__norank_c__OLB14	OTU1482	15	23	35	21	17	8	18	50	2	8	0	0	1	0	0	0	0	1	0	0	199
d__Bacteria	k__norank_d__Bacteria	p__Proteobacteria	c__Alphaproteobacteria	o__Acetobacterales	f__Acetobacteraceae	g__norank_f__Acetobacteraceae	s__metagenome_g__norank_f__Acetobacteraceae	OTU4820	1	0	0	0	1	0	0	0	0	1	0	0	0	0	0	0	0	0	0	0	3
d__Bacteria	k__norank_d__Bacteria	p__Methylomirabilota	c__Methylomirabilia	o__Methylomirabilales	f__Methylomirabilaceae	g__Sh765B-TzT-35	s__uncultured_bacterium_g__Sh765B-TzT-35	OTU495	0	1	0	0	0	1	0	0	0	1	0	0	0	0	0	0	0	0	0	0	3
d__Bacteria	k__norank_d__Bacteria	p__Latescibacterota	c__norank_p__Latescibacterota	o__norank_c__norank_p__Latescibacterota	f__norank_o__norank_c__norank_p__Latescibacterota	g__norank_f__norank_o__norank_c__norank_p__Latescibacterota	s__uncultured_bacterium_g__norank_f__norank_o__norank_c__norank_p__Latescibacterota	OTU5601	0	0	0	0	3	0	1	1	10	0	0	0	0	0	0	0	0	0	0	0	15
d__Bacteria	k__norank_d__Bacteria	p__LCP-89	c__norank_p__LCP-89	o__norank_c__norank_p__LCP-89	f__norank_o__norank_c__norank_p__LCP-89	g__norank_f__norank_o__norank_c__norank_p__LCP-89	s__uncultured_bacterium_g__norank_f__norank_o__norank_c__norank_p__LCP-89	OTU3673	1	0	0	0	1	0	1	0	0	1	0	0	0	0	0	0	0	0	0	0	4
d__Bacteria	k__norank_d__Bacteria	p__Acidobacteriota	c__Acidobacteriae	o__Acidobacteriales	f__norank_o__Acidobacteriales	g__norank_f__norank_o__Acidobacteriales	s__uncultured_Acidobacteriaceae_bacterium_g__norank_f__norank	OTU3091	0	0	0	0	0	6	1	0	0	0	0	0	0	0	0	0	0	0	0	0	7
d__Bacteria	k__norank_d__Bacteria	p__Methylomirabilota	c__Methylomirabilia	o__Rokubacteriales	f__unclassified_o__Rokubacteriales	g__unclassified_o__Rokubacteriales	s__unclassified_o__Rokubacteriales	OTU2677	0	0	0	0	0	7	0	0	0	0	0	0	0	0	0	0	0	0	0	0	7
d__Bacteria	k__norank_d__Bacteria	p__Proteobacteria	c__Gammaproteobacteria	o__Burkholderiales	f__Neisseriaceae	g__norank_f__Neisseriaceae	s__unclassified_g__norank_f__Neisseriaceae	OTU7877	0	0	0	0	0	0	0	0	0	0	0	0	0	0	0	0	1	0	0	0	1
d__Bacteria	k__norank_d__Bacteria	p__Patescibacteria	c__Gracilibacteria	o__Absconditabacteriales_SR1	f__norank_o__Absconditabacteriales_SR1	g__norank_f__norank_o__Absconditabacteriales_SR1	s__unclassified_g__norank_f__norank_o__Absconditabacteriales_SR1	OTU757	0	1	0	0	0	0	0	0	0	1	1	0	0	0	0	0	1	1	0	1	6
d__Bacteria	k__norank_d__Bacteria	p__Desulfobacterota	c__norank_p__Desulfobacterota	o__norank_c__norank_p__Desulfobacterota	f__norank_o__norank_c__norank_p__Desulfobacterota	g__norank_f__norank_o__norank_c__norank_p__Desulfobacterota	s__uncultured_delta_proteobacterium_g__norank_f__norank_o__norank_c__norank_p__Desulfobacterota	OTU1887	0	0	2	0	2	11	2	0	0	1	0	0	0	0	0	0	0	0	1	0	19
d__Bacteria	k__norank_d__Bacteria	p__Patescibacteria	c__ABY1	o__Candidatus_Falkowbacteria	f__norank_o__Candidatus_Falkowbacteria	g__norank_f__norank_o__Candidatus_Falkowbacteria	s__unclassified_g__norank_f__norank_o__Candidatus_Falkowbacteria	OTU4082	0	0	2	0	0	0	1	0	0	0	0	0	0	0	0	0	1	0	0	0	4
d__Bacteria	k__norank_d__Bacteria	p__unclassified_k__norank_d__Bacteria	c__unclassified_k__norank_d__Bacteria	o__unclassified_k__norank_d__Bacteria	f__unclassified_k__norank_d__Bacteria	g__unclassified_k__norank_d__Bacteria	s__unclassified_k__norank_d__Bacteria	OTU714	0	1	0	0	0	1	1	0	2	1	0	0	0	0	0	0	0	0	0	0	6
d__Bacteria	k__norank_d__Bacteria	p__Actinobacteriota	c__Actinobacteria	o__Micrococcales	f__unclassified_o__Micrococcales	g__unclassified_o__Micrococcales	s__unclassified_o__Micrococcales	OTU1320	35	18	71	5	9	1	1	2	0	2	0	0	1	0	1	0	0	0	0	1	147
d__Bacteria	k__norank_d__Bacteria	p__WS2	c__norank_p__WS2	o__norank_c__norank_p__WS2	f__norank_o__norank_c__norank_p__WS2	g__norank_f__norank_o__norank_c__norank_p__WS2	s__uncultured_bacterium_g__norank_f__norank_o__norank_c__norank_p__WS2	OTU2231	0	0	0	0	0	2	0	0	0	0	0	0	0	0	0	0	0	0	0	0	2
d__Bacteria	k__norank_d__Bacteria	p__Verrucomicrobiota	c__Lentisphaeria	o__Victivallales	f__Victivallaceae	g__norank_f__Victivallaceae	s__uncultured_organism_g__norank_f__Victivallaceae	OTU7605	0	0	0	0	0	0	0	0	0	0	0	0	0	0	0	1	0	0	0	1	2
d__Bacteria	k__norank_d__Bacteria	p__Bacteroidota	c__Bacteroidia	o__Flavobacteriales	f__Flavobacteriaceae	g__Flavobacterium	s__unclassified_g__Flavobacterium	OTU1529	5	3	1	3	2	4	2	0	0	0	2	0	0	1	0	0	0	0	0	0	23
d__Bacteria	k__norank_d__Bacteria	p__Chloroflexi	c__Anaerolineae	o__Anaerolineales	f__Anaerolineaceae	g__Anaerolinea	s__uncultured_soil_bacterium_g__Anaerolinea	OTU591	0	1	0	3	1	0	1	1	1	0	0	0	0	0	0	1	0	0	0	0	9
d__Bacteria	k__norank_d__Bacteria	p__Myxococcota	c__Polyangia	o__mle1-27	f__norank_o__mle1-27	g__norank_f__norank_o__mle1-27	s__metagenome_g__norank_f__norank_o__mle1-27	OTU1641	0	1	1	1	0	0	1	0	0	0	0	0	0	0	0	0	0	0	0	1	5
d__Bacteria	k__norank_d__Bacteria	p__Proteobacteria	c__Alphaproteobacteria	o__Rhodobacterales	f__Rhodobacteraceae	g__Amaricoccus	s__unclassified_g__Amaricoccus	OTU1061	4	5	10	7	4	8	7	7	5	2	0	0	1	0	0	0	0	0	0	0	60
d__Bacteria	k__norank_d__Bacteria	p__Bacteroidota	c__Bacteroidia	o__Cytophagales	f__unclassified_o__Cytophagales	g__unclassified_o__Cytophagales	s__unclassified_o__Cytophagales	OTU7974	0	0	0	0	0	0	0	0	0	0	0	0	0	0	0	13	27	10	17	1	68
d__Bacteria	k__norank_d__Bacteria	p__Myxococcota	c__bacteriap25	o__norank_c__bacteriap25	f__norank_o__norank_c__bacteriap25	g__norank_f__norank_o__norank_c__bacteriap25	s__unclassified_g__norank_f__norank_o__norank_c__bacteriap25	OTU4922	1	2	0	0	0	1	3	1	0	1	0	0	0	0	0	0	0	0	0	0	9
d__Bacteria	k__norank_d__Bacteria	p__Proteobacteria	c__Alphaproteobacteria	o__Rhodobacterales	f__Rhodobacteraceae	g__Limibaculum	s__uncultured_bacterium_g__Limibaculum	OTU3779	2	1	1	0	1	0	1	1	0	1	0	0	0	0	0	0	0	0	0	1	9
d__Bacteria	k__norank_d__Bacteria	p__Desulfobacterota	c__Syntrophia	o__Syntrophales	f__norank_o__Syntrophales	g__norank_f__norank_o__Syntrophales	s__uncultured_bacterium_g__norank_f__norank_o__Syntrophales	OTU4700	0	0	0	0	0	0	1	0	4	0	0	0	0	0	0	0	0	0	0	0	5
d__Bacteria	k__norank_d__Bacteria	p__Bdellovibrionota	c__Oligoflexia	o__Oligoflexales	f__norank_o__Oligoflexales	g__Oligoflexus	s__unclassified_g__Oligoflexus	OTU8619	1	0	3	0	2	6	6	1	0	1	0	0	0	1	0	0	1	0	4	3	29
d__Bacteria	k__norank_d__Bacteria	p__Bacteroidota	c__Bacteroidia	o__Flavobacteriales	f__Crocinitomicaceae	g__Fluviicola	s__uncultured_Flexibacter_sp._g__Fluviicola	OTU6746	0	0	0	0	0	0	0	0	0	0	1	3	1	2	0	0	0	0	0	0	7
d__Bacteria	k__norank_d__Bacteria	p__Acidobacteriota	c__Vicinamibacteria	o__Vicinamibacterales	f__norank_o__Vicinamibacterales	g__norank_f__norank_o__Vicinamibacterales	s__uncultured_Acidobacteriales_bacterium_g__norank_f__norank_o__Vicinamibacterales	OTU151	5	1	0	0	0	0	0	0	0	0	0	0	0	0	0	0	0	0	0	0	6
d__Bacteria	k__norank_d__Bacteria	p__Actinobacteriota	c__MB-A2-108	o__norank_c__MB-A2-108	f__norank_o__norank_c__MB-A2-108	g__norank_f__norank_o__norank_c__MB-A2-108	s__unclassified_g__norank_f__norank_o__norank_c__MB-A2-108	OTU3175	4	1	2	0	4	40	10	5	2	1	0	0	0	0	0	1	0	0	0	1	71
d__Bacteria	k__norank_d__Bacteria	p__GAL15	c__norank_p__GAL15	o__norank_c__norank_p__GAL15	f__norank_o__norank_c__norank_p__GAL15	g__norank_f__norank_o__norank_c__norank_p__GAL15	s__uncultured_bacterium_g__norank_f__norank_o__norank_c__norank_p__GAL15	OTU2726	0	0	0	0	0	9	0	0	0	0	0	0	0	0	0	0	0	0	0	0	9
d__Bacteria	k__norank_d__Bacteria	p__Chloroflexi	c__TK10	o__norank_c__TK10	f__norank_o__norank_c__TK10	g__norank_f__norank_o__norank_c__TK10	s__unclassified_g__norank_f__norank_o__norank_c__TK10	OTU2615	1	2	2	0	1	1	2	3	0	1	0	0	0	0	0	1	1	0	0	0	15
d__Bacteria	k__norank_d__Bacteria	p__Bacteroidota	c__Bacteroidia	o__Chitinophagales	f__norank_o__Chitinophagales	g__norank_f__norank_o__Chitinophagales	s__uncultured_Cytophagales_bacterium_g__norank_f__norank	OTU7437	0	0	0	0	0	0	0	0	0	0	1	0	1	0	0	0	0	0	0	0	2
d__Bacteria	k__norank_d__Bacteria	p__Planctomycetota	c__Phycisphaerae	o__Phycisphaerales	f__AKAU3564_sediment_group	g__norank_f__AKAU3564_sediment_group	s__unclassified_g__norank_f__AKAU3564_sediment_group	OTU2998	0	0	0	0	0	2	0	0	0	0	0	0	0	0	0	0	0	0	0	0	2
d__Bacteria	k__norank_d__Bacteria	p__Bacteroidota	c__Ignavibacteria	o__Ignavibacteriales	f__SR-FBR-L83	g__norank_f__SR-FBR-L83	s__uncultured_bacterium_g__norank_f__SR-FBR-L83	OTU3189	0	2	0	0	0	2	0	0	0	1	0	0	0	0	0	0	0	1	0	0	6
d__Bacteria	k__norank_d__Bacteria	p__Bacteroidota	c__Bacteroidia	o__Bacteroidales	f__Tannerellaceae	g__Macellibacteroides	s__uncultured_bacterium_g__Macellibacteroides	OTU8639	12	24	24	38	8	7	6	1	0	3	36	42	114	65	78	38	53	175	156	129	1009
d__Bacteria	k__norank_d__Bacteria	p__Verrucomicrobiota	c__Chlamydiae	o__Chlamydiales	f__Simkaniaceae	g__unclassified_f__Simkaniaceae	s__unclassified_f__Simkaniaceae	OTU7340	0	0	0	0	0	0	0	0	0	1	0	0	0	0	1	0	0	0	0	1	3
d__Bacteria	k__norank_d__Bacteria	p__Patescibacteria	c__Saccharimonadia	o__Saccharimonadales	f__norank_o__Saccharimonadales	g__norank_f__norank_o__Saccharimonadales	s__unclassified_g__norank_f__norank_o__Saccharimonadales	OTU7014	0	0	0	0	0	0	1	0	0	0	0	0	1	0	0	1	1	0	1	0	5
d__Bacteria	k__norank_d__Bacteria	p__Desulfobacterota	c__Syntrophobacteria	o__Syntrophobacterales	f__Syntrophobacteraceae	g__Syntrophobacter	s__unclassified_g__Syntrophobacter	OTU5545	1	2	0	1	1	3	4	3	15	0	0	0	0	0	0	0	0	0	0	0	30
d__Bacteria	k__norank_d__Bacteria	p__Firmicutes	c__Clostridia	o__norank_c__Clostridia	f__Hungateiclostridiaceae	g__norank_f__Hungateiclostridiaceae	s__unclassified_g__norank_f__Hungateiclostridiaceae	OTU2099	1	22	17	31	8	9	29	6	51	14	0	0	0	2	0	0	1	0	1	2	194
d__Bacteria	k__norank_d__Bacteria	p__Actinobacteriota	c__Coriobacteriia	o__Coriobacteriales	f__Eggerthellaceae	g__norank_f__Eggerthellaceae	s__uncultured_bacterium_g__norank_f__Eggerthellaceae	OTU8720	0	0	0	0	0	0	0	0	0	0	0	0	0	0	0	0	0	0	0	2	2
d__Bacteria	k__norank_d__Bacteria	p__Myxococcota	c__Polyangia	o__Polyangiales	f__Polyangiaceae	g__Pajaroellobacter	s__metagenome_g__Pajaroellobacter	OTU6279	11	0	6	2	13	7	3	7	1	7	0	0	0	0	1	0	0	0	2	0	60
d__Bacteria	k__norank_d__Bacteria	p__Acidobacteriota	c__Vicinamibacteria	o__Vicinamibacterales	f__norank_o__Vicinamibacterales	g__norank_f__norank_o__Vicinamibacterales	s__unclassified_g__norank_f__norank_o__Vicinamibacterales	OTU4488	5	1	2	1	4	2	1	8	15	6	0	0	0	0	0	0	0	0	0	0	45
d__Bacteria	k__norank_d__Bacteria	p__Zixibacteria	c__norank_p__Zixibacteria	o__norank_c__norank_p__Zixibacteria	f__norank_o__norank_c__norank_p__Zixibacteria	g__norank_f__norank_o__norank_c__norank_p__Zixibacteria	s__uncultured_candidate_division_TA06_bacterium	OTU5275	0	0	0	0	0	0	0	0	2	1	0	0	0	0	0	0	0	0	0	0	3
d__Bacteria	k__norank_d__Bacteria	p__Actinobacteriota	c__Actinobacteria	o__Frankiales	f__Sporichthyaceae	g__hgcI_clade	s__Candidatus_Planktophila_lacus	OTU8312	0	0	0	0	0	0	0	0	0	0	18	16	15	16	23	1	0	0	5	2	96
d__Bacteria	k__norank_d__Bacteria	p__Zixibacteria	c__norank_p__Zixibacteria	o__norank_c__norank_p__Zixibacteria	f__norank_o__norank_c__norank_p__Zixibacteria	g__norank_f__norank_o__norank_c__norank_p__Zixibacteria	s__uncultured_candidate_division_TA06_bacterium	OTU5270	1	0	1	0	0	0	1	2	18	4	0	0	0	0	0	0	0	1	0	0	28
d__Bacteria	k__norank_d__Bacteria	p__Proteobacteria	c__Alphaproteobacteria	o__Rhizobiales	f__Beijerinckiaceae	g__unclassified_f__Beijerinckiaceae	s__unclassified_f__Beijerinckiaceae	OTU7418	0	0	0	0	0	0	0	0	0	0	1	1	0	0	0	0	0	1	0	0	3
d__Bacteria	k__norank_d__Bacteria	p__Acidobacteriota	c__Thermoanaerobaculia	o__Thermoanaerobaculales	f__Thermoanaerobaculaceae	g__Subgroup_10	s__uncultured_prokaryote_g__Subgroup_10	OTU5249	19	10	19	23	13	7	4	35	15	19	1	0	0	0	0	0	0	1	0	0	166
d__Bacteria	k__norank_d__Bacteria	p__Patescibacteria	c__Saccharimonadia	o__Saccharimonadales	f__unclassified_o__Saccharimonadales	g__unclassified_o__Saccharimonadales	s__unclassified_o__Saccharimonadales	OTU7882	0	0	1	0	0	0	0	0	0	0	0	0	0	0	0	0	1	0	0	0	2
d__Bacteria	k__norank_d__Bacteria	p__Cyanobacteria	c__Cyanobacteriia	o__Cyanobacteriales	f__Microcystaceae	g__Snowella_0TU37S04	s__uncultured_bacterium_g__Snowella_0TU37S04	OTU8357	0	0	0	0	0	0	0	0	0	0	0	0	0	2	0	4	0	0	0	1	7
d__Bacteria	k__norank_d__Bacteria	p__Proteobacteria	c__Alphaproteobacteria	o__Rhizobiales	f__Pleomorphomonadaceae	g__norank_f__Pleomorphomonadaceae	s__uncultured_bacterium_g__norank_f__Pleomorphomonadaceae	OTU6379	4	2	9	5	0	0	4	1	0	30	0	2	3	0	1	0	1	0	0	0	62
d__Bacteria	k__norank_d__Bacteria	p__Planctomycetota	c__OM190	o__norank_c__OM190	f__norank_o__norank_c__OM190	g__norank_f__norank_o__norank_c__OM190	s__unclassified_g__norank_f__norank_o__norank_c__OM190	OTU1778	1	1	1	0	4	0	1	0	0	0	0	0	0	0	0	0	0	0	0	0	8
d__Bacteria	k__norank_d__Bacteria	p__Bacteroidota	c__Kapabacteria	o__Kapabacteriales	f__norank_o__Kapabacteriales	g__norank_f__norank_o__Kapabacteriales	s__unclassified_g__norank_f__norank_o__Kapabacteriales	OTU1627	0	0	0	3	0	0	0	0	0	0	1	0	0	0	0	0	0	0	0	0	4
d__Bacteria	k__norank_d__Bacteria	p__Chloroflexi	c__Anaerolineae	o__Caldilineales	f__Caldilineaceae	g__unclassified_f__Caldilineaceae	s__unclassified_f__Caldilineaceae	OTU1174	0	0	12	4	0	0	0	1	0	0	0	0	0	0	0	0	0	0	0	0	17
d__Bacteria	k__norank_d__Bacteria	p__Hydrogenedentes	c__Hydrogenedentia	o__Hydrogenedentiales	f__Hydrogenedensaceae	g__norank_f__Hydrogenedensaceae	s__metagenome_g__norank_f__Hydrogenedensaceae	OTU5839	1	3	0	0	1	0	1	0	1	1	0	0	0	0	0	0	0	0	0	0	8
d__Bacteria	k__norank_d__Bacteria	p__Verrucomicrobiota	c__Kiritimatiellae	o__WCHB1-41	f__norank_o__WCHB1-41	g__norank_f__norank_o__WCHB1-41	s__uncultured_Verrucomicrobia_bacterium_g__norank_f__norank_o__WCHB1-41	OTU3616	0	1	0	1	0	0	1	0	0	0	0	0	0	0	0	0	0	0	0	0	3
d__Bacteria	k__norank_d__Bacteria	p__Chloroflexi	c__Anaerolineae	o__RBG-13-54-9	f__norank_o__RBG-13-54-9	g__norank_f__norank_o__RBG-13-54-9	s__unclassified_g__norank_f__norank_o__RBG-13-54-9	OTU3310	0	0	1	0	0	0	0	0	0	0	0	0	0	0	0	0	0	0	0	0	1
d__Bacteria	k__norank_d__Bacteria	p__Patescibacteria	c__Microgenomatia	o__norank_c__Microgenomatia	f__norank_o__norank_c__Microgenomatia	g__norank_f__norank_o__norank_c__Microgenomatia	s__candidate_division_CPR3_bacterium_RIFOXYB2_FULL_35_8	OTU5603	0	0	0	0	0	0	0	0	1	0	0	0	0	0	0	0	0	0	0	0	1
d__Bacteria	k__norank_d__Bacteria	p__Chloroflexi	c__Anaerolineae	o__Anaerolineales	f__Anaerolineaceae	g__norank_f__Anaerolineaceae	s__uncultured_Chloroflexi_bacterium_g__norank_f__Anaerolineaceae	OTU3774	6	0	0	0	5	37	1	2	0	3	0	0	0	0	0	0	0	0	0	0	54
d__Bacteria	k__norank_d__Bacteria	p__Bacteroidota	c__Bacteroidia	o__Chitinophagales	f__Chitinophagaceae	g__Filimonas	s__uncultured_Filimonas_sp.	OTU8837	0	0	0	0	0	0	0	0	0	0	0	0	0	0	0	0	0	0	0	1	1
d__Bacteria	k__norank_d__Bacteria	p__Chloroflexi	c__Anaerolineae	o__Anaerolineales	f__Anaerolineaceae	g__norank_f__Anaerolineaceae	s__unclassified_g__norank_f__Anaerolineaceae	OTU889	10	3	11	7	9	2	6	0	4	1	1	3	0	3	0	0	0	0	0	0	60
d__Bacteria	k__norank_d__Bacteria	p__Bacteroidota	c__Bacteroidia	o__Bacteroidales	f__Bacteroidetes_BD2-2	g__norank_f__Bacteroidetes_BD2-2	s__unclassified_g__norank_f__Bacteroidetes_BD2-2	OTU6388	0	6	3	2	0	0	1	0	0	1	0	0	0	0	0	0	0	0	0	0	13
d__Bacteria	k__norank_d__Bacteria	p__Verrucomicrobiota	c__Verrucomicrobiae	o__Pedosphaerales	f__Pedosphaeraceae	g__ADurb.Bin063-1	s__unclassified_g__ADurb.Bin063-1	OTU523	6	15	3	2	0	1	1	1	0	4	5	1	0	1	0	0	0	0	0	0	40
d__Bacteria	k__norank_d__Bacteria	p__Bacteroidota	c__Kryptonia	o__Kryptoniales	f__BSV26	g__norank_f__BSV26	s__uncultured_bacterium_g__norank_f__BSV26	OTU1975	1	2	0	1	19	4	3	2	2	2	0	0	0	0	0	0	0	0	0	0	36
d__Bacteria	k__norank_d__Bacteria	p__Planctomycetota	c__Phycisphaerae	o__Phycisphaerales	f__Phycisphaeraceae	g__CL500-3	s__uncultured_planctomycete_g__CL500-3	OTU6973	0	0	0	0	0	0	0	0	0	0	2	3	10	3	3	0	0	1	1	1	24
d__Bacteria	k__norank_d__Bacteria	p__Proteobacteria	c__Alphaproteobacteria	o__Rhizobiales	f__Hyphomicrobiaceae	g__Pedomicrobium	s__metagenome_g__Pedomicrobium	OTU5016	1	0	2	1	0	0	0	1	3	0	0	0	0	0	0	0	0	0	0	0	8
d__Bacteria	k__norank_d__Bacteria	p__Proteobacteria	c__Gammaproteobacteria	o__Coxiellales	f__Coxiellaceae	g__Coxiella	s__unclassified_g__Coxiella	OTU1662	0	0	1	2	0	0	0	0	0	0	0	0	0	0	1	0	0	0	0	0	4
d__Bacteria	k__norank_d__Bacteria	p__Myxococcota	c__Polyangia	o__Haliangiales	f__Haliangiaceae	g__Haliangium	s__unclassified_g__Haliangium	OTU2284	1	0	0	0	2	5	1	0	0	0	0	0	0	0	0	0	0	0	0	0	9
d__Bacteria	k__norank_d__Bacteria	p__Proteobacteria	c__Alphaproteobacteria	o__Reyranellales	f__Reyranellaceae	g__Reyranella	s__uncultured_bacterium_g__Reyranella	OTU3606	17	7	3	1	3	2	10	10	2	4	1	2	1	2	0	2	4	0	1	5	77
d__Bacteria	k__norank_d__Bacteria	p__Verrucomicrobiota	c__Omnitrophia	o__Omnitrophales	f__Omnitrophaceae	g__Candidatus_Omnitrophus	s__uncultured_bacterium_g__Candidatus_Omnitrophus	OTU799	0	0	0	0	1	0	0	0	0	0	0	0	0	0	0	0	0	0	0	0	1
d__Bacteria	k__norank_d__Bacteria	p__Gemmatimonadota	c__S0134_terrestrial_group	o__norank_c__S0134_terrestrial_group	f__norank_o__norank_c__S0134_terrestrial_group	g__norank_f__norank_o__norank_c__S0134_terrestrial_group	s__unclassified_g__norank_f__norank_o__norank_c__S0134_terrestrial_group	OTU5936	1	1	0	0	0	0	1	0	0	1	0	0	0	0	0	0	0	0	0	0	4
d__Bacteria	k__norank_d__Bacteria	p__Proteobacteria	c__Gammaproteobacteria	o__Cellvibrionales	f__Cellvibrionaceae	g__norank_f__Cellvibrionaceae	s__unclassified_g__norank_f__Cellvibrionaceae	OTU8378	0	0	0	0	0	0	0	0	0	0	0	0	0	0	0	0	0	2	1	4	7
d__Bacteria	k__norank_d__Bacteria	p__Nitrospinota	c__P9X2b3D02	o__norank_c__P9X2b3D02	f__norank_o__norank_c__P9X2b3D02	g__norank_f__norank_o__norank_c__P9X2b3D02	s__uncultured_prokaryote_g__norank_f__norank_o__norank_c__P9X2b3D02	OTU4422	1	1	1	0	3	0	0	0	0	6	0	0	0	0	0	0	0	0	0	0	12
d__Bacteria	k__norank_d__Bacteria	p__Verrucomicrobiota	c__Chlamydiae	o__Chlamydiales	f__Parachlamydiaceae	g__unclassified_f__Parachlamydiaceae	s__unclassified_f__Parachlamydiaceae	OTU5964	0	0	0	0	2	0	1	0	0	2	0	0	0	0	0	0	0	0	0	0	5
d__Bacteria	k__norank_d__Bacteria	p__Firmicutes	c__Clostridia	o__Lachnospirales	f__Lachnospiraceae	g__Lachnotalea	s__uncultured_bacterium_g__Lachnotalea	OTU2771	1	2	0	1	0	32	2	3	4	1	0	1	1	1	0	1	0	0	2	0	52
d__Bacteria	k__norank_d__Bacteria	p__Planctomycetota	c__OM190	o__norank_c__OM190	f__norank_o__norank_c__OM190	g__norank_f__norank_o__norank_c__OM190	s__uncultured_bacterium_g__norank_f__norank_o__norank_c__OM190	OTU8549	0	1	4	4	2	1	1	1	0	0	0	0	0	0	0	0	0	0	0	0	14
d__Bacteria	k__norank_d__Bacteria	p__Acidobacteriota	c__Vicinamibacteria	o__Subgroup_17	f__norank_o__Subgroup_17	g__norank_f__norank_o__Subgroup_17	s__unclassified_g__norank_f__norank_o__Subgroup_17	OTU5654	55	40	27	27	56	138	72	77	99	123	4	1	4	3	0	0	0	0	4	1	731
d__Bacteria	k__norank_d__Bacteria	p__Acidobacteriota	c__Thermoanaerobaculia	o__Thermoanaerobaculales	f__Thermoanaerobaculaceae	g__Subgroup_10	s__unclassified_g__Subgroup_10	OTU2773	1	1	0	0	0	4	0	0	0	1	0	0	0	0	0	0	0	0	0	0	7
d__Bacteria	k__norank_d__Bacteria	p__Bacteroidota	c__Bacteroidia	o__Chitinophagales	f__Chitinophagaceae	g__Niastella	s__uncultured_bacterium_g__Niastella	OTU2042	1	1	1	0	1	0	1	0	0	0	0	0	0	1	0	0	0	0	0	0	6
d__Bacteria	k__norank_d__Bacteria	p__Spirochaetota	c__MVP-15	o__norank_c__MVP-15	f__norank_o__norank_c__MVP-15	g__norank_f__norank_o__norank_c__MVP-15	s__uncultured_bacterium_g__norank_f__norank_o__norank_c__MVP-15	OTU3655	0	0	0	0	0	0	4	0	0	0	0	0	0	0	0	1	1	0	1	0	7
d__Bacteria	k__norank_d__Bacteria	p__Cyanobacteria	c__Sericytochromatia	o__norank_c__Sericytochromatia	f__norank_o__norank_c__Sericytochromatia	g__norank_f__norank_o__norank_c__Sericytochromatia	s__uncultured_bacterium_g__norank_f__norank_o__norank_c__Sericytochromatia	OTU5344	0	2	2	0	0	7	1	0	1	0	0	0	0	0	0	0	0	0	0	0	13
d__Bacteria	k__norank_d__Bacteria	p__Acidobacteriota	c__Holophagae	o__Subgroup_7	f__norank_o__Subgroup_7	g__norank_f__norank_o__Subgroup_7	s__unclassified_g__norank_f__norank_o__Subgroup_7	OTU3675	0	0	0	0	0	0	2	0	0	0	0	0	0	0	0	0	0	0	0	0	2
d__Bacteria	k__norank_d__Bacteria	p__Chloroflexi	c__Chloroflexia	o__Thermomicrobiales	f__JG30-KF-CM45	g__norank_f__JG30-KF-CM45	s__uncultured_Thermomicrobia_bacterium_g__norank_f__JG30-KF-CM45	OTU3363	0	0	0	0	0	2	2	0	1	1	0	0	0	0	0	0	0	0	0	0	6
d__Bacteria	k__norank_d__Bacteria	p__Bacteroidota	c__Bacteroidia	o__Bacteroidales	f__p-251-o5	g__norank_f__p-251-o5	s__uncultured_bacterium_g__norank_f__p-251-o5	OTU8024	0	0	0	0	0	0	0	0	0	0	0	0	1	1	1	0	0	0	0	1	4
d__Bacteria	k__norank_d__Bacteria	p__Armatimonadota	c__norank_p__Armatimonadota	o__norank_c__norank_p__Armatimonadota	f__norank_o__norank_c__norank_p__Armatimonadota	g__norank_f__norank_o__norank_c__norank_p__Armatimonadota	s__metagenome_g__norank_f__norank_o__norank_c__norank_p__Armatimonadota	OTU1910	2	0	0	0	1	0	0	0	0	0	0	0	0	0	0	0	0	0	0	0	3
d__Bacteria	k__norank_d__Bacteria	p__Bacteroidota	c__Kapabacteria	o__Kapabacteriales	f__norank_o__Kapabacteriales	g__norank_f__norank_o__Kapabacteriales	s__uncultured_soil_bacterium_g__norank_f__norank_o__Kapabacteriales	OTU7171	0	0	0	0	0	0	0	0	0	0	1	0	1	1	0	0	0	1	0	1	5
d__Bacteria	k__norank_d__Bacteria	p__Caldisericota	c__Caldisericia	o__Caldisericales	f__LF045	g__norank_f__LF045	s__uncultured_bacterium_g__norank_f__LF045	OTU4817	0	0	0	0	0	2	1	3	3	0	0	0	0	0	0	0	0	0	0	0	9
d__Bacteria	k__norank_d__Bacteria	p__Nitrospirota	c__Thermodesulfovibrionia	o__norank_c__Thermodesulfovibrionia	f__norank_o__norank_c__Thermodesulfovibrionia	g__norank_f__norank_o__norank_c__Thermodesulfovibrionia	s__uncultured_prokaryote_g__norank_f__norank_o__norank_c__Thermodesulfovibrionia	OTU988	0	6	3	3	11	2	3	8	4	7	0	0	0	0	0	0	0	0	1	0	48
d__Bacteria	k__norank_d__Bacteria	p__Patescibacteria	c__Saccharimonadia	o__Saccharimonadales	f__unclassified_o__Saccharimonadales	g__unclassified_o__Saccharimonadales	s__unclassified_o__Saccharimonadales	OTU1838	0	0	1	0	1	0	0	0	0	0	0	0	1	0	0	0	0	0	0	0	3
d__Bacteria	k__norank_d__Bacteria	p__Chloroflexi	c__Anaerolineae	o__RBG-13-54-9	f__norank_o__RBG-13-54-9	g__norank_f__norank_o__RBG-13-54-9	s__unclassified_g__norank_f__norank_o__RBG-13-54-9	OTU1254	10	6	5	1	9	19	13	6	4	7	0	0	0	0	0	0	0	0	0	0	80
d__Bacteria	k__norank_d__Bacteria	p__Desulfobacterota	c__Desulfobulbia	o__Desulfobulbales	f__Desulfobulbaceae	g__Desulfobulbus	s__uncultured_bacterium_g__Desulfobulbus	OTU57	6	2	1	1	0	2	2	1	0	1	0	0	2	0	1	1	1	0	2	1	24
d__Bacteria	k__norank_d__Bacteria	p__Planctomycetota	c__Pla3_lineage	o__norank_c__Pla3_lineage	f__norank_o__norank_c__Pla3_lineage	g__norank_f__norank_o__norank_c__Pla3_lineage	s__uncultured_soil_bacterium_PBS-II-37	OTU1987	0	0	0	0	2	0	0	0	0	0	0	0	0	0	0	0	0	0	0	0	2
d__Bacteria	k__norank_d__Bacteria	p__Bdellovibrionota	c__Oligoflexia	o__Oligoflexales	f__norank_o__Oligoflexales	g__norank_f__norank_o__Oligoflexales	s__unclassified_g__norank_f__norank_o__Oligoflexales	OTU7555	0	0	0	0	0	0	0	0	0	0	0	0	0	0	0	1	0	1	1	1	4
d__Bacteria	k__norank_d__Bacteria	p__Cyanobacteria	c__Cyanobacteriia	o__Cyanobacteriales	f__unclassified_o__Cyanobacteriales	g__unclassified_o__Cyanobacteriales	s__unclassified_o__Cyanobacteriales	OTU1347	0	0	1	0	0	0	0	0	0	0	0	0	0	0	0	0	0	0	0	0	1
d__Bacteria	k__norank_d__Bacteria	p__Methylomirabilota	c__Methylomirabilia	o__Rokubacteriales	f__norank_o__Rokubacteriales	g__norank_f__norank_o__Rokubacteriales	s__uncultured_bacterium_g__norank_f__norank_o__Rokubacteriales	OTU3898	0	0	0	0	0	4	3	0	0	0	0	0	0	0	0	0	0	0	0	0	7
d__Bacteria	k__norank_d__Bacteria	p__Actinobacteriota	c__Actinobacteria	o__Corynebacteriales	f__Dietziaceae	g__Dietzia	s__Dietzia_maris	OTU1407	6	4	11	4	0	0	2	2	0	1	3	1	0	2	0	0	0	0	0	0	36
d__Bacteria	k__norank_d__Bacteria	p__Proteobacteria	c__Gammaproteobacteria	o__Burkholderiales	f__unclassified_o__Burkholderiales	g__unclassified_o__Burkholderiales	s__unclassified_o__Burkholderiales	OTU8917	0	0	0	0	0	0	0	0	0	0	0	0	0	0	0	0	0	0	1	0	1
d__Bacteria	k__norank_d__Bacteria	p__Chloroflexi	c__Chloroflexia	o__Chloroflexales	f__Roseiflexaceae	g__norank_f__Roseiflexaceae	s__uncultured_Roseiflexus_sp._g__norank	OTU7482	0	0	0	0	0	0	0	0	0	0	2	4	4	1	2	10	7	4	1	0	35
d__Bacteria	k__norank_d__Bacteria	p__Planctomycetota	c__Phycisphaerae	o__Phycisphaerales	f__Phycisphaeraceae	g__SM1A02	s__metagenome_g__SM1A02	OTU1239	2	0	3	5	2	0	0	0	0	0	0	0	0	1	0	0	0	0	0	0	13
d__Bacteria	k__norank_d__Bacteria	p__Chloroflexi	c__Anaerolineae	o__SBR1031	f__norank_o__SBR1031	g__norank_f__norank_o__SBR1031	s__uncultured_Chlorobi_bacterium_g__norank_f__norank_o__SBR1031	OTU4385	1	2	7	7	35	19	7	14	18	4	0	0	0	0	0	0	0	0	0	0	114
d__Bacteria	k__norank_d__Bacteria	p__Proteobacteria	c__Gammaproteobacteria	o__Steroidobacterales	f__Steroidobacteraceae	g__norank_f__Steroidobacteraceae	s__unclassified_g__norank_f__Steroidobacteraceae	OTU8645	58	105	53	120	67	21	70	113	40	215	9	4	2	9	1	9	8	4	13	5	926
d__Bacteria	k__norank_d__Bacteria	p__Sva0485	c__norank_p__Sva0485	o__norank_c__norank_p__Sva0485	f__norank_o__norank_c__norank_p__Sva0485	g__norank_f__norank_o__norank_c__norank_p__Sva0485	s__uncultured_bacterium_g__norank_f__norank_o__norank_c__norank_p__Sva0485	OTU4551	0	1	0	6	6	0	10	6	41	3	0	0	0	0	0	0	0	0	0	0	73
d__Bacteria	k__norank_d__Bacteria	p__Cyanobacteria	c__Cyanobacteriia	o__Chloroplast	f__norank_o__Chloroplast	g__norank_f__norank_o__Chloroplast	s__Pectinodesmus_pectinatus	OTU7341	0	1	0	0	0	0	0	0	0	1	0	1	0	0	1	0	1	0	0	0	5
d__Bacteria	k__norank_d__Bacteria	p__Cloacimonadota	c__Cloacimonadia	o__Cloacimonadales	f__Cloacimonadaceae	g__norank_f__Cloacimonadaceae	s__uncultured_bacterium_g__norank_f__Cloacimonadaceae	OTU3994	0	0	2	1	0	0	1	0	0	0	0	0	0	0	0	0	0	0	0	0	4
d__Bacteria	k__norank_d__Bacteria	p__Planctomycetota	c__OM190	o__norank_c__OM190	f__norank_o__norank_c__OM190	g__norank_f__norank_o__norank_c__OM190	s__uncultured_bacterium_g__norank_f__norank_o__norank_c__OM190	OTU6717	2	1	1	1	1	0	0	0	0	0	1	0	0	0	0	0	0	0	0	0	7
d__Bacteria	k__norank_d__Bacteria	p__NB1-j	c__norank_p__NB1-j	o__norank_c__norank_p__NB1-j	f__norank_o__norank_c__norank_p__NB1-j	g__norank_f__norank_o__norank_c__norank_p__NB1-j	s__metagenome_g__norank_f__norank_o__norank_c__norank	OTU4654	5	0	0	0	1	2	1	0	0	0	0	0	0	0	0	0	0	0	0	0	9
d__Bacteria	k__norank_d__Bacteria	p__Proteobacteria	c__Gammaproteobacteria	o__Methylococcales	f__Methylomonadaceae	g__Methylomicrobium	s__uncultured_gamma_proteobacterium_g__Methylomicrobium	OTU453	0	1	0	1	0	1	3	1	3	3	1	0	1	0	0	1	1	0	0	0	17
d__Bacteria	k__norank_d__Bacteria	p__Bacteroidota	c__Bacteroidia	o__Sphingobacteriales	f__AKYH767	g__norank_f__AKYH767	s__uncultured_bacterium_g__norank_f__AKYH767	OTU777	7	18	3	9	3	7	4	2	1	2	0	0	0	1	0	1	0	0	2	0	60
d__Bacteria	k__norank_d__Bacteria	p__Spirochaetota	c__Spirochaetia	o__Spirochaetales	f__Spirochaetaceae	g__norank_f__Spirochaetaceae	s__unclassified_g__norank_f__Spirochaetaceae	OTU4708	0	2	0	1	0	0	0	0	0	0	0	0	0	0	0	0	0	0	0	0	3
d__Bacteria	k__norank_d__Bacteria	p__Cyanobacteria	c__Cyanobacteriia	o__Phormidesmiales	f__Nodosilineaceae	g__Nodosilinea_PCC-7104	s__uncultured_bacterium_g__Nodosilinea_PCC-7104	OTU8158	2	1	2	1	0	0	0	0	0	0	0	7	7	10	4	1	17	1	0	0	53
d__Bacteria	k__norank_d__Bacteria	p__Sumerlaeota	c__Sumerlaeia	o__norank_c__Sumerlaeia	f__norank_o__norank_c__Sumerlaeia	g__norank_f__norank_o__norank_c__Sumerlaeia	s__Omnitrophica_bacterium_OLB16	OTU5563	0	1	0	0	0	0	0	0	1	0	0	0	0	0	0	0	0	0	0	0	2
d__Bacteria	k__norank_d__Bacteria	p__Chloroflexi	c__Anaerolineae	o__Anaerolineales	f__Anaerolineaceae	g__unclassified_f__Anaerolineaceae	s__unclassified_f__Anaerolineaceae	OTU5494	1	0	0	1	1	0	0	0	1	0	0	0	0	0	0	0	0	0	0	0	4
d__Bacteria	k__norank_d__Bacteria	p__Acidobacteriota	c__Subgroup_18	o__norank_c__Subgroup_18	f__norank_o__norank_c__Subgroup_18	g__norank_f__norank_o__norank_c__Subgroup_18	s__uncultured_Acidobacteria_bacterium_g__norank_f__norank_o__norank_c__Subgroup_18	OTU4043	4	1	1	0	2	3	3	1	5	6	0	0	0	0	0	0	0	0	0	0	26
d__Bacteria	k__norank_d__Bacteria	p__Chloroflexi	c__Anaerolineae	o__Anaerolineales	f__Anaerolineaceae	g__unclassified_f__Anaerolineaceae	s__unclassified_f__Anaerolineaceae	OTU5490	1	0	0	0	0	0	0	0	1	1	0	0	0	0	0	0	0	0	0	0	3
d__Bacteria	k__norank_d__Bacteria	p__Chloroflexi	c__Anaerolineae	o__Anaerolineales	f__Anaerolineaceae	g__norank_f__Anaerolineaceae	s__uncultured_organism_g__norank_f__Anaerolineaceae	OTU1998	0	0	0	0	1	0	1	0	0	0	0	0	0	0	0	0	0	0	0	0	2
d__Bacteria	k__norank_d__Bacteria	p__Chloroflexi	c__Anaerolineae	o__norank_c__Anaerolineae	f__norank_o__norank_c__Anaerolineae	g__norank_f__norank_o__norank_c__Anaerolineae	s__uncultured_bacterium_g__norank_f__norank_o__norank_c__Anaerolineae	OTU5007	0	0	0	0	1	0	0	1	5	0	0	0	0	0	0	0	0	0	0	0	7
d__Bacteria	k__norank_d__Bacteria	p__Chloroflexi	c__Anaerolineae	o__Anaerolineales	f__Anaerolineaceae	g__norank_f__Anaerolineaceae	s__uncultured_Chloroflexi_bacterium_g__norank_f__Anaerolineaceae	OTU1227	0	1	128	30	73	0	3	11	90	9	0	0	0	0	0	0	0	0	0	0	345
d__Bacteria	k__norank_d__Bacteria	p__Patescibacteria	c__Microgenomatia	o__Candidatus_Woesebacteria	f__norank_o__Candidatus_Woesebacteria	g__norank_f__norank_o__Candidatus_Woesebacteria	s__uncultured_bacterium_g__norank_f__norank_o__Candidatus_Woesebacteria	OTU1359	0	0	1	0	0	0	0	0	0	0	0	2	0	0	0	0	0	0	0	0	3
d__Bacteria	k__norank_d__Bacteria	p__Myxococcota	c__Myxococcia	o__Myxococcales	f__Vulgatibacteraceae	g__Vulgatibacter	s__uncultured_bacterium_g__Vulgatibacter	OTU4381	0	0	0	0	0	1	2	1	0	1	0	0	0	0	0	0	0	0	0	0	5
d__Bacteria	k__norank_d__Bacteria	p__Chloroflexi	c__Anaerolineae	o__RBG-13-54-9	f__norank_o__RBG-13-54-9	g__norank_f__norank_o__RBG-13-54-9	s__unclassified_g__norank_f__norank_o__RBG-13-54-9	OTU4997	0	1	9	8	3	0	0	4	0	0	0	0	0	0	0	0	0	0	0	0	25
d__Bacteria	k__norank_d__Bacteria	p__Patescibacteria	c__Parcubacteria	o__norank_c__Parcubacteria	f__norank_o__norank_c__Parcubacteria	g__norank_f__norank_o__norank_c__Parcubacteria	s__uncultured_bacterium_g__norank_f__norank_o__norank_c__Parcubacteria	OTU7907	0	0	0	0	0	0	0	0	0	0	1	0	0	0	0	2	0	0	0	0	3
d__Bacteria	k__norank_d__Bacteria	p__Myxococcota	c__Myxococcia	o__Myxococcales	f__Anaeromyxobacteraceae	g__Anaeromyxobacter	s__uncultured_bacterium_g__Anaeromyxobacter	OTU4834	6	0	3	1	3	10	6	1	3	0	0	0	0	0	0	0	0	0	0	0	33
d__Bacteria	k__norank_d__Bacteria	p__Proteobacteria	c__Gammaproteobacteria	o__Burkholderiales	f__Comamonadaceae	g__unclassified_f__Comamonadaceae	s__unclassified_f__Comamonadaceae	OTU6474	0	4	2	2	1	1	6	5	0	22	0	0	1	0	0	2	1	0	3	2	52
d__Bacteria	k__norank_d__Bacteria	p__Proteobacteria	c__Gammaproteobacteria	o__Burkholderiales	f__Comamonadaceae	g__unclassified_f__Comamonadaceae	s__unclassified_f__Comamonadaceae	OTU6475	1	3	2	4	3	4	2	1	4	4	1	0	0	0	0	5	4	3	8	3	52
d__Bacteria	k__norank_d__Bacteria	p__Bacteroidota	c__Bacteroidia	o__Chitinophagales	f__Saprospiraceae	g__norank_f__Saprospiraceae	s__bacterium_enrichment_culture_clone_SRAO_34	OTU1663	4	0	2	2	12	0	0	0	0	0	1	0	1	1	0	0	0	0	0	0	23
d__Bacteria	k__norank_d__Bacteria	p__Acidobacteriota	c__Vicinamibacteria	o__Vicinamibacterales	f__Vicinamibacteraceae	g__norank_f__Vicinamibacteraceae	s__unclassified_g__norank_f__Vicinamibacteraceae	OTU4895	0	0	1	0	0	0	1	1	0	0	0	0	0	0	0	0	0	0	0	0	3
d__Bacteria	k__norank_d__Bacteria	p__Myxococcota	c__Myxococcia	o__Myxococcales	f__Myxococcaceae	g__P3OB-42	s__uncultured_bacterium_g__P3OB-42	OTU3845	0	0	0	0	0	0	1	0	0	0	0	0	0	0	0	0	0	0	0	0	1
d__Bacteria	k__norank_d__Bacteria	p__Proteobacteria	c__Gammaproteobacteria	o__JG36-GS-52	f__norank_o__JG36-GS-52	g__norank_f__norank_o__JG36-GS-52	s__uncultured_gamma_proteobacterium_g__norank_f__norank_o__JG36-GS-52	OTU6077	12	6	2	4	6	10	4	9	4	6	0	0	0	0	0	0	0	0	1	1	65
d__Bacteria	k__norank_d__Bacteria	p__Patescibacteria	c__Saccharimonadia	o__Saccharimonadales	f__norank_o__Saccharimonadales	g__norank_f__norank_o__Saccharimonadales	s__unclassified_g__norank_f__norank_o__Saccharimonadales	OTU6828	1	2	1	0	0	1	0	0	0	1	2	3	1	0	0	2	3	0	2	2	21
d__Bacteria	k__norank_d__Bacteria	p__Spirochaetota	c__Leptospirae	o__Leptospirales	f__Leptospiraceae	g__RBG-16-49-21	s__unclassified_g__RBG-16-49-21	OTU5325	0	3	3	0	0	0	3	2	11	0	0	1	0	0	0	0	0	0	0	0	23
d__Bacteria	k__norank_d__Bacteria	p__Proteobacteria	c__Gammaproteobacteria	o__Burkholderiales	f__Comamonadaceae	g__Rhizobacter	s__Rhizobacter_gummiphilus	OTU3394	14	20	48	66	20	0	22	1	0	0	1	1	0	11	2	0	1	1	0	0	208
d__Bacteria	k__norank_d__Bacteria	p__Actinobacteriota	c__Acidimicrobiia	o__Actinomarinales	f__norank_o__Actinomarinales	g__norank_f__norank_o__Actinomarinales	s__uncultured_Actinobacteridae_bacterium_g__norank_f__norank	OTU95	8	0	1	0	1	7	1	1	0	0	0	0	0	0	0	0	0	0	0	0	19
d__Bacteria	k__norank_d__Bacteria	p__Bacteroidota	c__Bacteroidia	o__Sphingobacteriales	f__AKYH767	g__norank_f__AKYH767	s__unclassified_g__norank_f__AKYH767	OTU1409	0	2	1	3	0	0	2	0	1	0	0	0	0	0	0	0	1	0	0	0	10
d__Bacteria	k__norank_d__Bacteria	p__Myxococcota	c__Polyangia	o__Haliangiales	f__Haliangiaceae	g__Haliangium	s__uncultured_bacterium_g__Haliangium	OTU5079	1	0	0	0	0	0	0	0	2	0	0	0	0	0	0	0	0	0	0	0	3
d__Bacteria	k__norank_d__Bacteria	p__Actinobacteriota	c__Thermoleophilia	o__Solirubrobacterales	f__67-14	g__norank_f__67-14	s__uncultured_bacterium_g__norank_f__67-14	OTU2883	5	4	9	8	3	9	1	6	4	1	0	0	0	0	0	0	0	0	0	0	50
d__Bacteria	k__norank_d__Bacteria	p__Patescibacteria	c__Saccharimonadia	o__Saccharimonadales	f__norank_o__Saccharimonadales	g__norank_f__norank_o__Saccharimonadales	s__unclassified_g__norank_f__norank_o__Saccharimonadales	OTU3202	0	0	0	0	0	1	0	0	0	0	0	0	0	0	0	0	0	0	0	0	1
d__Bacteria	k__norank_d__Bacteria	p__Proteobacteria	c__Gammaproteobacteria	o__Diplorickettsiales	f__Diplorickettsiaceae	g__Aquicella	s__unclassified_g__Aquicella	OTU8152	0	0	0	0	0	0	0	0	1	0	0	0	0	0	0	0	0	2	0	0	3
d__Bacteria	k__norank_d__Bacteria	p__Myxococcota	c__Polyangia	o__Blfdi19	f__norank_o__Blfdi19	g__norank_f__norank_o__Blfdi19	s__uncultured_bacterium_g__norank_f__norank_o__Blfdi19	OTU8369	0	0	0	0	0	0	0	0	0	0	0	0	0	1	0	0	0	0	1	0	2
d__Bacteria	k__norank_d__Bacteria	p__Patescibacteria	c__Microgenomatia	o__Candidatus_Roizmanbacteria	f__norank_o__Candidatus_Roizmanbacteria	g__norank_f__norank_o__Candidatus_Roizmanbacteria	s__unclassified_g__norank_f__norank_o__Candidatus_Roizmanbacteria	OTU4721	0	0	1	0	0	0	0	0	0	0	0	0	0	0	0	0	0	0	0	0	1
d__Bacteria	k__norank_d__Bacteria	p__Patescibacteria	c__Parcubacteria	o__norank_c__Parcubacteria	f__norank_o__norank_c__Parcubacteria	g__norank_f__norank_o__norank_c__Parcubacteria	s__uncultured_bacterium_g__norank_f__norank_o__norank_c__Parcubacteria	OTU8984	0	1	0	0	0	0	0	0	0	0	0	0	0	1	0	0	0	0	0	1	3
d__Bacteria	k__norank_d__Bacteria	p__Chloroflexi	c__Chloroflexia	o__Thermomicrobiales	f__unclassified_o__Thermomicrobiales	g__unclassified_o__Thermomicrobiales	s__unclassified_o__Thermomicrobiales	OTU143	1	0	0	0	0	0	0	1	0	0	0	0	0	0	0	0	0	0	0	0	2
d__Bacteria	k__norank_d__Bacteria	p__Firmicutes	c__Clostridia	o__Oscillospirales	f__Ruminococcaceae	g__Ruminococcus	s__uncultured_Papillibacter_sp.	OTU2706	15	1	1	0	1	6	5	4	1	1	0	1	0	0	0	1	0	0	0	0	37
d__Bacteria	k__norank_d__Bacteria	p__Firmicutes	c__Clostridia	o__Caldicoprobacterales	f__Caldicoprobacteraceae	g__Caldicoprobacter	s__uncultured_Firmicutes_bacterium_g__Caldicoprobacter	OTU3244	0	0	0	0	0	1	0	0	0	0	0	0	0	0	0	0	0	0	0	0	1
d__Bacteria	k__norank_d__Bacteria	p__Acidobacteriota	c__Vicinamibacteria	o__Subgroup_17	f__norank_o__Subgroup_17	g__norank_f__norank_o__Subgroup_17	s__unclassified_g__norank_f__norank_o__Subgroup_17	OTU3169	1	0	0	0	0	21	0	0	0	1	0	0	0	0	0	1	0	0	0	0	24
d__Bacteria	k__norank_d__Bacteria	p__Bacteroidota	c__Bacteroidia	o__Chitinophagales	f__Saprospiraceae	g__norank_f__Saprospiraceae	s__unclassified_g__norank_f__Saprospiraceae	OTU7543	0	0	0	0	0	0	0	0	0	0	1	5	0	0	0	1	0	0	0	0	7
d__Bacteria	k__norank_d__Bacteria	p__Firmicutes	c__Clostridia	o__norank_c__Clostridia	f__Hungateiclostridiaceae	g__unclassified_f__Hungateiclostridiaceae	s__unclassified_f__Hungateiclostridiaceae	OTU8526	0	1	0	1	0	0	1	1	1	0	0	0	0	0	0	0	0	0	0	0	5
d__Bacteria	k__norank_d__Bacteria	p__Actinobacteriota	c__RBG-16-55-12	o__norank_c__RBG-16-55-12	f__norank_o__norank_c__RBG-16-55-12	g__norank_f__norank_o__norank_c__RBG-16-55-12	s__uncultured_bacterium_g__norank_f__norank_o__norank_c__RBG-16-55-12	OTU3277	0	0	0	0	3	0	2	1	0	0	0	0	0	0	0	0	0	0	0	0	6
d__Bacteria	k__norank_d__Bacteria	p__Acidobacteriota	c__Thermoanaerobaculia	o__Thermoanaerobaculales	f__Thermoanaerobaculaceae	g__TPD-58	s__unclassified_g__TPD-58	OTU5409	0	0	0	0	0	0	0	0	3	0	0	0	0	0	0	0	0	0	0	0	3
d__Bacteria	k__norank_d__Bacteria	p__Chloroflexi	c__TK10	o__norank_c__TK10	f__norank_o__norank_c__TK10	g__norank_f__norank_o__norank_c__TK10	s__unclassified_g__norank_f__norank_o__norank_c__TK10	OTU1709	0	0	0	1	0	0	0	1	0	0	0	0	0	0	0	0	0	0	0	0	2
d__Bacteria	k__norank_d__Bacteria	p__Chloroflexi	c__Anaerolineae	o__SBR1031	f__norank_o__SBR1031	g__norank_f__norank_o__SBR1031	s__anaerobic_bacterium_KX	OTU4999	0	1	1	0	2	0	0	4	5	0	0	0	0	0	0	0	0	0	0	0	13
d__Bacteria	k__norank_d__Bacteria	p__Bacteroidota	c__Bacteroidia	o__Bacteroidales	f__Prolixibacteraceae	g__Roseimarinus	s__unclassified_g__Roseimarinus	OTU1518	0	0	0	2	0	0	0	0	0	0	0	0	0	0	0	0	0	0	0	0	2
d__Bacteria	k__norank_d__Bacteria	p__Acidobacteriota	c__Blastocatellia	o__11-24	f__norank_o__11-24	g__norank_f__norank_o__11-24	s__unclassified_g__norank_f__norank_o__11-24	OTU127	2	0	0	0	0	0	0	0	0	0	0	0	0	0	0	0	0	0	0	0	2
d__Bacteria	k__norank_d__Bacteria	p__Latescibacterota	c__norank_p__Latescibacterota	o__norank_c__norank_p__Latescibacterota	f__norank_o__norank_c__norank_p__Latescibacterota	g__norank_f__norank_o__norank_c__norank_p__Latescibacterota	s__unclassified_g__norank_f__norank_o__norank_c__norank_p__Latescibacterota	OTU289	2	0	0	0	0	1	0	0	0	0	0	0	0	0	0	0	0	0	0	0	3
d__Bacteria	k__norank_d__Bacteria	p__Firmicutes	c__unclassified_p__Firmicutes	o__unclassified_p__Firmicutes	f__unclassified_p__Firmicutes	g__unclassified_p__Firmicutes	s__unclassified_p__Firmicutes	OTU4984	0	0	0	2	2	0	0	2	4	0	0	0	0	0	0	0	0	0	0	0	10
d__Bacteria	k__norank_d__Bacteria	p__Bacteroidota	c__Bacteroidia	o__Bacteroidales	f__SB-5	g__norank_f__SB-5	s__unclassified_g__norank_f__SB-5	OTU3847	1	0	0	0	2	0	0	0	0	0	0	0	0	0	0	0	0	0	0	0	3
d__Bacteria	k__norank_d__Bacteria	p__Chloroflexi	c__Anaerolineae	o__SBR1031	f__norank_o__SBR1031	g__norank_f__norank_o__SBR1031	s__uncultured_bacterium_g__norank_f__norank_o__SBR1031	OTU3191	0	0	0	0	0	3	0	0	0	0	0	0	0	0	0	0	0	0	0	0	3
d__Bacteria	k__norank_d__Bacteria	p__Gemmatimonadota	c__S0134_terrestrial_group	o__norank_c__S0134_terrestrial_group	f__norank_o__norank_c__S0134_terrestrial_group	g__norank_f__norank_o__norank_c__S0134_terrestrial_group	s__uncultured_Gemmatimonadales_bacterium_g__norank	OTU3617	1	0	0	0	1	5	3	1	0	0	0	0	0	0	0	0	0	0	0	0	11
d__Bacteria	k__norank_d__Bacteria	p__RCP2-54	c__norank_p__RCP2-54	o__norank_c__norank_p__RCP2-54	f__norank_o__norank_c__norank_p__RCP2-54	g__norank_f__norank_o__norank_c__norank_p__RCP2-54	s__hydrothermal_vent_metagenome_g__norank_f__norank_o__norank_c__norank_p__RCP2-54	OTU6118	10	3	3	6	8	8	6	7	14	6	1	0	1	0	1	0	1	0	1	0	76
d__Bacteria	k__norank_d__Bacteria	p__Proteobacteria	c__Gammaproteobacteria	o__Gammaproteobacteria_Incertae_Sedis	f__unclassified_o__Gammaproteobacteria_Incertae_Sedis	g__Acidibacter	s__uncultured_proteobacterium_g__Acidibacter	OTU6467	12	2	3	5	11	12	5	5	1	14	0	1	0	1	0	0	0	0	0	0	72
d__Bacteria	k__norank_d__Bacteria	p__Chloroflexi	c__Anaerolineae	o__Caldilineales	f__Caldilineaceae	g__norank_f__Caldilineaceae	s__uncultured_bacterium_g__norank_f__Caldilineaceae	OTU1319	6	2	0	1	12	0	2	0	0	0	0	0	0	1	0	0	0	0	0	0	24
d__Bacteria	k__norank_d__Bacteria	p__Acidobacteriota	c__Acidobacteriae	o__norank_c__Acidobacteriae	f__norank_o__norank_c__Acidobacteriae	g__Paludibaculum	s__unclassified_g__Paludibaculum	OTU2641	0	0	0	1	1	16	4	4	0	0	0	0	0	0	0	0	1	0	1	0	28
d__Bacteria	k__norank_d__Bacteria	p__Chloroflexi	c__Anaerolineae	o__Anaerolineales	f__Anaerolineaceae	g__Anaerolinea	s__unclassified_g__Anaerolinea	OTU1258	17	9	10	6	8	0	5	0	1	3	0	0	0	0	0	0	0	0	0	0	59
d__Bacteria	k__norank_d__Bacteria	p__Bacteroidota	c__Bacteroidia	o__Chitinophagales	f__Saprospiraceae	g__Haliscomenobacter	s__uncultured_bacterium_g__Haliscomenobacter	OTU7431	0	0	0	0	0	0	0	0	0	0	0	3	0	0	1	1	1	0	0	0	6
d__Bacteria	k__norank_d__Bacteria	p__NKB15	c__norank_p__NKB15	o__norank_c__norank_p__NKB15	f__norank_o__norank_c__norank_p__NKB15	g__norank_f__norank_o__norank_c__norank_p__NKB15	s__uncultured_bacterium_g__norank_f__norank_o__norank_c__norank_p__NKB15	OTU5526	0	1	0	0	0	0	1	0	2	0	0	0	0	0	0	0	0	0	0	0	4
d__Bacteria	k__norank_d__Bacteria	p__Planctomycetota	c__OM190	o__norank_c__OM190	f__norank_o__norank_c__OM190	g__norank_f__norank_o__norank_c__OM190	s__unclassified_g__norank_f__norank_o__norank_c__OM190	OTU2098	3	0	0	1	1	1	0	1	0	0	0	0	0	0	0	0	0	0	0	0	7
d__Bacteria	k__norank_d__Bacteria	p__Proteobacteria	c__Gammaproteobacteria	o__Burkholderiales	f__SC-I-84	g__norank_f__SC-I-84	s__unclassified_g__norank_f__SC-I-84	OTU313	4	0	3	3	3	8	4	9	12	1	0	0	0	0	0	0	0	0	1	0	48
d__Bacteria	k__norank_d__Bacteria	p__unclassified_k__norank_d__Bacteria	c__unclassified_k__norank_d__Bacteria	o__unclassified_k__norank_d__Bacteria	f__unclassified_k__norank_d__Bacteria	g__unclassified_k__norank_d__Bacteria	s__unclassified_k__norank_d__Bacteria	OTU4753	2	0	0	0	0	0	1	0	0	0	0	0	0	0	0	0	0	0	0	0	3
d__Bacteria	k__norank_d__Bacteria	p__Verrucomicrobiota	c__Chlamydiae	o__Chlamydiales	f__Parachlamydiaceae	g__unclassified_f__Parachlamydiaceae	s__unclassified_f__Parachlamydiaceae	OTU874	0	2	0	0	0	0	0	0	0	0	0	2	0	0	0	0	0	0	0	0	4
d__Bacteria	k__norank_d__Bacteria	p__Bacteroidota	c__Kryptonia	o__Kryptoniales	f__BSV26	g__norank_f__BSV26	s__unclassified_g__norank_f__BSV26	OTU3836	0	1	2	0	5	0	5	1	12	1	0	0	0	0	0	0	0	0	0	0	27
d__Bacteria	k__norank_d__Bacteria	p__Gemmatimonadota	c__Gemmatimonadetes	o__Gemmatimonadales	f__Gemmatimonadaceae	g__norank_f__Gemmatimonadaceae	s__unclassified_g__norank_f__Gemmatimonadaceae	OTU5636	1	0	0	0	0	0	1	2	1	0	0	0	0	0	0	0	0	0	0	0	5
d__Bacteria	k__norank_d__Bacteria	p__Firmicutes	c__Clostridia	o__norank_c__Clostridia	f__Gracilibacteraceae	g__Lutispora	s__uncultured_bacterium_g__Lutispora	OTU3102	0	0	0	0	0	2	0	1	0	0	0	0	0	0	0	0	0	0	0	0	3
d__Bacteria	k__norank_d__Bacteria	p__Proteobacteria	c__Alphaproteobacteria	o__Tistrellales	f__Geminicoccaceae	g__norank_f__Geminicoccaceae	s__uncultured_bacterium_g__norank_f__Geminicoccaceae	OTU2471	1	2	2	1	0	1	5	1	0	1	0	0	1	0	0	0	0	0	0	0	15
d__Bacteria	k__norank_d__Bacteria	p__Proteobacteria	c__Alphaproteobacteria	o__Micavibrionales	f__norank_o__Micavibrionales	g__norank_f__norank_o__Micavibrionales	s__unclassified_g__norank_f__norank_o__Micavibrionales	OTU7363	0	1	0	0	0	0	0	0	0	0	0	1	0	0	3	0	0	0	2	0	7
d__Bacteria	k__norank_d__Bacteria	p__Chloroflexi	c__Anaerolineae	o__SBR1031	f__A4b	g__norank_f__A4b	s__uncultured_bacterium_g__norank_f__A4b	OTU1108	6	13	9	4	8	28	13	4	7	2	2	0	0	0	0	0	0	0	0	0	96
d__Bacteria	k__norank_d__Bacteria	p__Verrucomicrobiota	c__Chlamydiae	o__Chlamydiales	f__Parachlamydiaceae	g__Neochlamydia	s__uncultured_bacterium_g__Neochlamydia	OTU235	6	0	0	0	0	1	0	0	0	0	0	0	0	0	0	0	0	0	0	0	7
d__Bacteria	k__norank_d__Bacteria	p__Acidobacteriota	c__Vicinamibacteria	o__Vicinamibacterales	f__norank_o__Vicinamibacterales	g__norank_f__norank_o__Vicinamibacterales	s__metagenome_g__norank_f__norank_o__Vicinamibacterales	OTU1478	0	0	6	2	1	0	0	0	0	0	0	0	0	0	0	0	0	0	0	0	9
d__Bacteria	k__norank_d__Bacteria	p__SAR324_cladeMarine_group_B	c__norank_p__SAR324_cladeMarine_group_B	o__norank_c__norank_p__SAR324_cladeMarine_group_B	f__norank_o__norank_c__norank_p__SAR324_cladeMarine_group_B	g__norank_f__norank_o__norank_c__norank_p__SAR324_cladeMarine_group_B	s__uncultured_bacterium_g__norank_f__norank_o__norank_c__norank_p__SAR324_cladeMarine_group_B	OTU646	0	1	0	0	0	0	0	1	0	1	0	0	0	0	0	0	0	0	0	0	3
d__Bacteria	k__norank_d__Bacteria	p__Patescibacteria	c__Kazania	o__norank_c__Kazania	f__norank_o__norank_c__Kazania	g__norank_f__norank_o__norank_c__Kazania	s__candidate_division_Kazan_bacterium_RBG_13_50_9	OTU880	0	0	1	1	2	1	2	1	3	1	0	0	0	0	0	0	0	0	0	0	12
d__Bacteria	k__norank_d__Bacteria	p__Cyanobacteria	c__Cyanobacteriia	o__Cyanobacteriales	f__Xenococcaceae	g__Pleurocapsa_PCC-7319	s__unclassified_g__Pleurocapsa_PCC-7319	OTU2016	0	0	1	0	1	0	0	0	0	0	0	0	0	0	0	0	0	0	0	0	2
d__Bacteria	k__norank_d__Bacteria	p__Proteobacteria	c__Alphaproteobacteria	o__unclassified_c__Alphaproteobacteria	f__unclassified_c__Alphaproteobacteria	g__unclassified_c__Alphaproteobacteria	s__unclassified_c__Alphaproteobacteria	OTU2767	0	0	0	0	0	2	0	0	0	0	0	0	0	0	0	0	0	0	0	0	2
d__Bacteria	k__norank_d__Bacteria	p__Bacteroidota	c__Bacteroidia	o__Chitinophagales	f__Chitinophagaceae	g__unclassified_f__Chitinophagaceae	s__unclassified_f__Chitinophagaceae	OTU7652	0	0	0	0	0	0	0	0	0	0	0	0	0	0	0	1	0	0	0	0	1
d__Bacteria	k__norank_d__Bacteria	p__Bdellovibrionota	c__Bdellovibrionia	o__Bdellovibrionales	f__Bdellovibrionaceae	g__Bdellovibrio	s__uncultured_bacterium_g__Bdellovibrio	OTU4618	0	0	0	0	0	0	0	1	0	0	0	0	0	0	0	0	1	0	0	0	2
d__Bacteria	k__norank_d__Bacteria	p__Bacteroidota	c__Bacteroidia	o__Bacteroidales	f__Bacteroidetes_vadinHA17	g__norank_f__Bacteroidetes_vadinHA17	s__uncultured_bacterium_g__norank_f__Bacteroidetes_vadinHA17	OTU1420	0	0	1	0	0	1	0	0	0	1	0	0	0	0	0	0	0	0	0	0	3
d__Bacteria	k__norank_d__Bacteria	p__Bacteroidota	c__Ignavibacteria	o__Ignavibacteriales	f__Ignavibacteriaceae	g__Ignavibacterium	s__uncultured_bacterium_g__Ignavibacterium	OTU6056	14	22	4	8	6	8	28	14	10	18	0	1	0	0	0	0	0	0	1	0	134
d__Bacteria	k__norank_d__Bacteria	p__Bacteroidota	c__Bacteroidia	o__Cytophagales	f__Microscillaceae	g__Ohtaekwangia	s__unclassified_g__Ohtaekwangia	OTU8931	0	0	1	0	0	0	0	0	0	0	0	0	0	0	0	0	1	0	0	0	2
d__Bacteria	k__norank_d__Bacteria	p__Cyanobacteria	c__Cyanobacteriia	o__Chloroplast	f__norank_o__Chloroplast	g__norank_f__norank_o__Chloroplast	s__Euglenaria_caudata_var._minor	OTU8101	0	0	0	0	0	0	0	0	0	0	0	1	0	1	1	1	0	0	0	0	4
d__Bacteria	k__norank_d__Bacteria	p__Cyanobacteria	c__Sericytochromatia	o__norank_c__Sericytochromatia	f__norank_o__norank_c__Sericytochromatia	g__norank_f__norank_o__norank_c__Sericytochromatia	s__unclassified_g__norank_f__norank_o__norank_c__Sericytochromatia	OTU8163	0	0	0	0	0	0	1	0	0	0	0	0	0	0	0	0	0	1	0	0	2
d__Bacteria	k__norank_d__Bacteria	p__Actinobacteriota	c__Acidimicrobiia	o__Actinomarinales	f__norank_o__Actinomarinales	g__norank_f__norank_o__Actinomarinales	s__uncultured_actinobacterium_g__norank_f__norank_o__Actinomarinales	OTU5161	3	4	6	11	24	11	20	26	117	26	0	0	1	0	0	0	0	0	0	0	249
d__Bacteria	k__norank_d__Bacteria	p__Proteobacteria	c__Alphaproteobacteria	o__unclassified_c__Alphaproteobacteria	f__unclassified_c__Alphaproteobacteria	g__unclassified_c__Alphaproteobacteria	s__unclassified_c__Alphaproteobacteria	OTU4720	1	0	0	0	2	0	0	2	0	0	0	0	0	0	0	0	0	0	0	0	5
d__Bacteria	k__norank_d__Bacteria	p__Verrucomicrobiota	c__Chlamydiae	o__Chlamydiales	f__Simkaniaceae	g__norank_f__Simkaniaceae	s__unclassified_g__norank_f__Simkaniaceae	OTU2972	1	0	0	0	1	0	0	0	0	0	0	0	0	0	0	0	0	0	0	0	2
d__Bacteria	k__norank_d__Bacteria	p__Actinobacteriota	c__Thermoleophilia	o__Gaiellales	f__norank_o__Gaiellales	g__norank_f__norank_o__Gaiellales	s__uncultured_Rubrobacteraceae_bacterium_g__norank	OTU508	4	7	9	13	19	4	19	11	36	12	0	0	0	0	0	0	0	0	0	0	134
d__Bacteria	k__norank_d__Bacteria	p__Patescibacteria	c__WWE3	o__norank_c__WWE3	f__norank_o__norank_c__WWE3	g__norank_f__norank_o__norank_c__WWE3	s__unclassified_g__norank_f__norank_o__norank_c__WWE3	OTU7498	0	0	0	0	1	0	1	1	0	0	1	0	0	0	0	0	0	0	0	0	4
d__Bacteria	k__norank_d__Bacteria	p__Firmicutes	c__Clostridia	o__Lachnospirales	f__Lachnospiraceae	g__Lachnospiraceae_NK4A136_group	s__uncultured_Clostridiales_bacterium_g__Lachnospiraceae_NK4A136_group	OTU464	0	10	0	0	0	0	0	0	0	0	0	0	1	0	0	0	0	0	1	0	12
d__Bacteria	k__norank_d__Bacteria	p__Planctomycetota	c__OM190	o__norank_c__OM190	f__norank_o__norank_c__OM190	g__norank_f__norank_o__norank_c__OM190	s__uncultured_bacterium_g__norank_f__norank_o__norank_c__OM190	OTU994	2	0	1	0	0	0	0	0	0	0	0	0	0	0	0	0	0	0	0	0	3
d__Bacteria	k__norank_d__Bacteria	p__Proteobacteria	c__Alphaproteobacteria	o__norank_c__Alphaproteobacteria	f__norank_o__norank_c__Alphaproteobacteria	g__norank_f__norank_o__norank_c__Alphaproteobacteria	s__uncultured_bacterium_g__norank_f__norank_o__norank_c__Alphaproteobacteria	OTU2019	5	0	2	2	4	1	1	0	1	0	0	0	0	2	0	0	0	0	0	0	18
d__Bacteria	k__norank_d__Bacteria	p__Myxococcota	c__Polyangia	o__Haliangiales	f__Haliangiaceae	g__Haliangium	s__uncultured_Kofleriaceae_bacterium_g__Haliangium	OTU442	2	2	0	0	2	0	1	0	0	0	0	0	0	0	0	0	0	0	0	0	7
d__Bacteria	k__norank_d__Bacteria	p__Chloroflexi	c__Anaerolineae	o__SBR1031	f__A4b	g__norank_f__A4b	s__uncultured_bacterium_g__norank_f__A4b	OTU2900	0	0	0	0	0	19	0	0	1	0	0	0	0	0	0	0	0	0	0	0	20
d__Bacteria	k__norank_d__Bacteria	p__Patescibacteria	c__Parcubacteria	o__Candidatus_Moranbacteria	f__norank_o__Candidatus_Moranbacteria	g__norank_f__norank_o__Candidatus_Moranbacteria	s__uncultured_bacterium_g__norank_f__norank_o__Candidatus_Moranbacteria	OTU1394	0	0	0	2	0	0	0	0	0	0	0	0	0	0	0	0	0	0	0	0	2
d__Bacteria	k__norank_d__Bacteria	p__Firmicutes	c__Clostridia	o__Peptostreptococcales-Tissierellales	f__Fusibacteraceae	g__Fusibacter	s__uncultured_prokaryote_g__Fusibacter	OTU8832	0	0	0	0	0	0	0	0	0	0	0	0	0	0	0	0	0	0	0	1	1
d__Bacteria	k__norank_d__Bacteria	p__Bdellovibrionota	c__Bdellovibrionia	o__Bacteriovoracales	f__Bacteriovoracaceae	g__Peredibacter	s__uncultured_prokaryote_g__Peredibacter	OTU8947	0	0	0	0	0	0	0	0	0	0	0	0	0	0	0	0	1	0	2	2	5
d__Bacteria	k__norank_d__Bacteria	p__Bacteroidota	c__Bacteroidia	o__Bacteroidales	f__Prevotellaceae	g__Prevotellaceae_UCG-004	s__unclassified_g__Prevotellaceae_UCG-004	OTU7074	0	0	0	0	0	0	0	0	0	0	1	0	1	0	0	0	1	0	0	1	4
d__Bacteria	k__norank_d__Bacteria	p__Patescibacteria	c__Dojkabacteria	o__norank_c__Dojkabacteria	f__norank_o__norank_c__Dojkabacteria	g__norank_f__norank_o__norank_c__Dojkabacteria	s__unclassified_g__norank_f__norank_o__norank_c__Dojkabacteria	OTU5753	0	0	0	0	0	0	1	0	0	2	0	0	0	0	0	0	0	0	0	0	3
d__Bacteria	k__norank_d__Bacteria	p__Chloroflexi	c__Dehalococcoidia	o__GIF9	f__AB-539-J10	g__norank_f__AB-539-J10	s__uncultured_organism_g__norank_f__AB-539-J10	OTU5689	0	0	1	0	0	0	2	0	4	0	0	0	0	0	0	0	0	0	0	0	7
d__Bacteria	k__norank_d__Bacteria	p__Proteobacteria	c__Gammaproteobacteria	o__Burkholderiales	f__Burkholderiaceae	g__Limnobacter	s__unclassified_g__Limnobacter	OTU7145	0	0	0	0	0	0	0	0	0	0	0	5	1	2	2	0	0	0	1	0	11
d__Bacteria	k__norank_d__Bacteria	p__Bacteroidota	c__Bacteroidia	o__Flavobacteriales	f__Flavobacteriaceae	g__Flavobacterium	s__unclassified_g__Flavobacterium	OTU7208	0	6	1	1	1	13	3	0	0	1	28	12	20	31	26	0	2	2	2	4	153
d__Bacteria	k__norank_d__Bacteria	p__Chloroflexi	c__Anaerolineae	o__unclassified_c__Anaerolineae	f__unclassified_c__Anaerolineae	g__unclassified_c__Anaerolineae	s__unclassified_c__Anaerolineae	OTU5876	0	0	0	1	5	6	2	1	8	2	0	0	0	0	0	0	0	0	0	0	25
d__Bacteria	k__norank_d__Bacteria	p__Desulfobacterota	c__Desulfobaccia	o__Desulfobaccales	f__Desulfobaccaceae	g__Desulfobacca	s__uncultured_delta_proteobacterium_g__Desulfobacca	OTU2323	1	0	0	0	1	1	0	0	0	0	0	0	0	0	0	0	1	0	0	0	4
d__Bacteria	k__norank_d__Bacteria	p__Spirochaetota	c__MVP-15	o__norank_c__MVP-15	f__norank_o__norank_c__MVP-15	g__norank_f__norank_o__norank_c__MVP-15	s__uncultured_bacterium_g__norank_f__norank_o__norank_c__MVP-15	OTU6933	0	0	1	3	0	0	0	0	0	0	0	1	0	0	1	0	0	0	0	0	6
d__Bacteria	k__norank_d__Bacteria	p__Proteobacteria	c__Alphaproteobacteria	o__Micavibrionales	f__norank_o__Micavibrionales	g__norank_f__norank_o__Micavibrionales	s__metagenome_g__norank_f__norank_o__Micavibrionales	OTU8329	0	0	0	0	0	0	0	0	0	0	0	0	0	1	1	0	0	0	1	0	3
d__Bacteria	k__norank_d__Bacteria	p__Firmicutes	c__Clostridia	o__Lachnospirales	f__Lachnospiraceae	g__Acetitomaculum	s__uncultured_bacterium_g__Acetitomaculum	OTU498	0	1	0	1	0	0	2	0	0	0	0	0	0	0	0	0	0	1	0	0	5
d__Bacteria	k__norank_d__Bacteria	p__Chloroflexi	c__Anaerolineae	o__Anaerolineales	f__Anaerolineaceae	g__norank_f__Anaerolineaceae	s__uncultured_Anaerolineaceae_bacterium_g__norank_f__Anaerolineaceae	OTU3858	17	20	28	12	37	26	37	16	26	24	0	1	0	1	0	0	1	0	0	0	246
d__Bacteria	k__norank_d__Bacteria	p__Myxococcota	c__bacteriap25	o__norank_c__bacteriap25	f__norank_o__norank_c__bacteriap25	g__norank_f__norank_o__norank_c__bacteriap25	s__unclassified_g__norank_f__norank_o__norank_c__bacteriap25	OTU5109	0	0	0	0	0	0	0	1	6	0	0	0	0	0	0	0	0	0	0	0	7
d__Bacteria	k__norank_d__Bacteria	p__Firmicutes	c__Bacilli	o__Izemoplasmatales	f__Izemoplasmataceae	g__norank_f__Izemoplasmataceae	s__uncultured_bacterium_g__norank_f__Izemoplasmataceae	OTU833	0	5	1	1	0	1	0	0	0	0	0	1	1	0	0	0	0	2	1	1	14
d__Bacteria	k__norank_d__Bacteria	p__Proteobacteria	c__Alphaproteobacteria	o__unclassified_c__Alphaproteobacteria	f__unclassified_c__Alphaproteobacteria	g__unclassified_c__Alphaproteobacteria	s__unclassified_c__Alphaproteobacteria	OTU1267	1	0	1	1	0	0	0	0	0	0	0	0	0	0	0	0	0	0	0	0	3
d__Bacteria	k__norank_d__Bacteria	p__Proteobacteria	c__Alphaproteobacteria	o__Elsterales	f__norank_o__Elsterales	g__norank_f__norank_o__Elsterales	s__unclassified_g__norank_f__norank_o__Elsterales	OTU2587	0	0	0	0	0	2	0	0	0	0	0	0	0	0	0	0	0	0	0	0	2
d__Bacteria	k__norank_d__Bacteria	p__unclassified_k__norank_d__Bacteria	c__unclassified_k__norank_d__Bacteria	o__unclassified_k__norank_d__Bacteria	f__unclassified_k__norank_d__Bacteria	g__unclassified_k__norank_d__Bacteria	s__unclassified_k__norank_d__Bacteria	OTU5116	0	0	0	0	0	0	0	0	3	0	0	0	0	0	0	0	0	0	0	0	3
d__Bacteria	k__norank_d__Bacteria	p__Chloroflexi	c__Dehalococcoidia	o__GIF9	f__norank_o__GIF9	g__norank_f__norank_o__GIF9	s__uncultured_bacterium_g__norank_f__norank_o__GIF9	OTU3637	0	1	0	1	0	0	5	0	14	0	0	0	0	0	0	0	0	0	1	0	22
d__Bacteria	k__norank_d__Bacteria	p__Bacteroidota	c__Bacteroidia	o__Flavobacteriales	f__Flavobacteriaceae	g__Flavobacterium	s__unclassified_g__Flavobacterium	OTU7991	0	0	0	0	0	0	0	0	0	0	0	0	0	0	0	1	0	0	0	0	1
d__Bacteria	k__norank_d__Bacteria	p__Actinobacteriota	c__Actinobacteria	o__Propionibacteriales	f__Propionibacteriaceae	g__norank_f__Propionibacteriaceae	s__Gram-positive_bacterium_SOGA22	OTU1246	0	1	4	3	0	0	1	3	0	1	0	0	0	0	0	0	0	0	0	0	13
d__Bacteria	k__norank_d__Bacteria	p__Chloroflexi	c__Anaerolineae	o__SBR1031	f__A4b	g__norank_f__A4b	s__uncultured_soil_bacterium_g__norank_f__A4b	OTU1250	5	2	2	0	0	1	0	0	0	0	0	0	0	0	0	0	0	0	0	0	10
d__Bacteria	k__norank_d__Bacteria	p__Fibrobacterota	c__Chitinivibrionia	o__Chitinivibrionales	f__Chitinivibrionaceae	g__possible_genus_03	s__unclassified_g__possible_genus_03	OTU6144	0	1	0	0	0	0	1	0	0	0	0	0	0	0	1	0	0	0	0	0	3
d__Bacteria	k__norank_d__Bacteria	p__Verrucomicrobiota	c__Verrucomicrobiae	o__Chthoniobacterales	f__Xiphinematobacteraceae	g__Candidatus_Xiphinematobacter	s__uncultured_bacterium_g__Candidatus_Xiphinematobacter	OTU285	7	4	1	0	3	0	4	0	0	0	0	0	0	2	0	0	0	0	0	0	21
d__Bacteria	k__norank_d__Bacteria	p__Proteobacteria	c__Gammaproteobacteria	o__Methylococcales	f__Methylococcaceae	g__unclassified_f__Methylococcaceae	s__unclassified_f__Methylococcaceae	OTU7699	0	0	0	0	0	0	0	0	0	0	0	0	0	0	0	1	0	0	0	0	1
d__Bacteria	k__norank_d__Bacteria	p__Firmicutes	c__Clostridia	o__Thermincolales	f__Thermincolaceae	g__Thermincola	s__unclassified_g__Thermincola	OTU3561	0	0	0	0	0	0	2	0	0	0	0	0	0	0	0	0	0	0	0	0	2
d__Bacteria	k__norank_d__Bacteria	p__Actinobacteriota	c__Acidimicrobiia	o__Microtrichales	f__norank_o__Microtrichales	g__norank_f__norank_o__Microtrichales	s__unclassified_g__norank_f__norank_o__Microtrichales	OTU3163	2	0	1	0	0	2	1	2	0	0	0	0	0	0	0	0	0	0	0	0	8
d__Bacteria	k__norank_d__Bacteria	p__Chloroflexi	c__Chloroflexia	o__Thermomicrobiales	f__JG30-KF-CM45	g__norank_f__JG30-KF-CM45	s__metagenome_g__norank_f__JG30-KF-CM45	OTU4212	12	5	11	2	4	17	9	14	3	5	1	0	0	0	0	0	0	0	0	0	83
d__Bacteria	k__norank_d__Bacteria	p__Chloroflexi	c__unclassified_p__Chloroflexi	o__unclassified_p__Chloroflexi	f__unclassified_p__Chloroflexi	g__unclassified_p__Chloroflexi	s__unclassified_p__Chloroflexi	OTU2663	0	0	0	0	0	5	1	0	0	1	0	0	0	0	0	0	0	0	0	0	7
d__Bacteria	k__norank_d__Bacteria	p__Patescibacteria	c__Saccharimonadia	o__Saccharimonadales	f__norank_o__Saccharimonadales	g__norank_f__norank_o__Saccharimonadales	s__uncultured_bacterium_g__norank_f__norank_o__Saccharimonadales	OTU3982	0	0	0	0	0	2	3	5	0	2	0	0	0	0	0	7	12	5	7	10	53
d__Bacteria	k__norank_d__Bacteria	p__Bacteroidota	c__Bacteroidia	o__Chitinophagales	f__Saprospiraceae	g__Phaeodactylibacter	s__uncultured_bacterium_g__Phaeodactylibacter	OTU2199	2	0	0	0	2	1	0	3	0	0	0	0	0	0	0	0	0	0	0	0	8
d__Bacteria	k__norank_d__Bacteria	p__Chloroflexi	c__SHA-26	o__norank_c__SHA-26	f__norank_o__norank_c__SHA-26	g__norank_f__norank_o__norank_c__SHA-26	s__unclassified_g__norank_f__norank_o__norank_c__SHA-26	OTU1169	0	0	1	0	2	1	0	0	0	0	0	0	0	0	0	0	0	0	0	0	4
d__Bacteria	k__norank_d__Bacteria	p__Bacteroidota	c__Bacteroidia	o__Bacteroidales	f__Prevotellaceae	g__Alloprevotella	s__gut_metagenome_g__Alloprevotella	OTU2014	0	0	0	0	0	0	0	0	0	0	0	0	0	1	0	0	0	0	0	0	1
d__Bacteria	k__norank_d__Bacteria	p__Myxococcota	c__Polyangia	o__Polyangiales	f__Sandaracinaceae	g__Sandaracinus	s__Sandaracinus_amylolyticus	OTU5878	4	1	0	2	12	7	0	5	0	2	0	0	0	0	0	0	0	0	0	0	33
d__Bacteria	k__norank_d__Bacteria	p__unclassified_k__norank_d__Bacteria	c__unclassified_k__norank_d__Bacteria	o__unclassified_k__norank_d__Bacteria	f__unclassified_k__norank_d__Bacteria	g__unclassified_k__norank_d__Bacteria	s__unclassified_k__norank_d__Bacteria	OTU1586	0	0	1	1	0	0	1	0	0	0	0	0	0	0	0	0	0	0	0	0	3
d__Bacteria	k__norank_d__Bacteria	p__Proteobacteria	c__Gammaproteobacteria	o__Burkholderiales	f__Chitinimonadaceae	g__Chitinimonas	s__uncultured_bacterium_g__Chitinimonas	OTU8946	0	0	0	0	0	0	0	0	0	0	0	0	0	0	0	0	0	0	1	1	2
d__Bacteria	k__norank_d__Bacteria	p__Proteobacteria	c__Gammaproteobacteria	o__Xanthomonadales	f__Rhodanobacteraceae	g__Ahniella	s__unclassified_g__Ahniella	OTU392	1	3	0	2	0	0	1	4	0	3	0	0	0	0	0	0	0	0	1	2	17
d__Bacteria	k__norank_d__Bacteria	p__Chloroflexi	c__Anaerolineae	o__Anaerolineales	f__Anaerolineaceae	g__unclassified_f__Anaerolineaceae	s__unclassified_f__Anaerolineaceae	OTU3385	0	0	0	0	1	0	1	0	2	0	0	0	0	0	0	0	0	0	0	0	4
d__Bacteria	k__norank_d__Bacteria	p__Proteobacteria	c__Gammaproteobacteria	o__1013-28-CG33	f__norank_o__1013-28-CG33	g__norank_f__norank_o__1013-28-CG33	s__uncultured_bacterium_g__norank_f__norank_o__1013-28-CG33	OTU5413	1	1	1	1	4	1	1	8	9	9	1	0	0	0	0	0	0	0	0	0	37
d__Bacteria	k__norank_d__Bacteria	p__Planctomycetota	c__Phycisphaerae	o__Phycisphaerales	f__Phycisphaeraceae	g__CL500-3	s__uncultured_bacterium_g__CL500-3	OTU7060	0	0	0	0	0	0	0	0	0	0	5	6	11	12	12	0	0	0	5	7	58
d__Bacteria	k__norank_d__Bacteria	p__Verrucomicrobiota	c__Chlamydiae	o__Chlamydiales	f__Parachlamydiaceae	g__Candidatus_Protochlamydia	s__metagenome_g__Candidatus_Protochlamydia	OTU8402	0	0	0	0	0	0	0	0	0	0	0	0	0	0	0	0	0	0	1	0	1
d__Bacteria	k__norank_d__Bacteria	p__Proteobacteria	c__Gammaproteobacteria	o__Competibacterales	f__Competibacteraceae	g__Candidatus_Competibacter	s__unclassified_g__Candidatus_Competibacter	OTU5127	8	15	20	22	2	4	6	10	31	20	0	1	0	0	0	0	0	0	0	0	139
d__Bacteria	k__norank_d__Bacteria	p__Actinobacteriota	c__Thermoleophilia	o__Solirubrobacterales	f__67-14	g__norank_f__67-14	s__uncultured_bacterium_g__norank_f__67-14	OTU5355	1	0	1	0	0	0	0	0	0	0	0	0	0	0	0	0	0	0	0	0	2
d__Bacteria	k__norank_d__Bacteria	p__Patescibacteria	c__Saccharimonadia	o__Saccharimonadales	f__norank_o__Saccharimonadales	g__norank_f__norank_o__Saccharimonadales	s__uncultured_bacterium_g__norank_f__norank_o__Saccharimonadales	OTU2586	1	0	0	0	0	8	0	0	0	0	1	0	0	0	0	1	0	2	0	0	13
d__Bacteria	k__norank_d__Bacteria	p__Chloroflexi	c__Anaerolineae	o__SBR1031	f__norank_o__SBR1031	g__norank_f__norank_o__SBR1031	s__unclassified_g__norank_f__norank_o__SBR1031	OTU5856	0	0	0	0	0	0	0	0	0	1	0	0	0	0	0	0	0	0	0	0	1
d__Bacteria	k__norank_d__Bacteria	p__Deinococcota	c__Deinococci	o__Deinococcales	f__Deinococcaceae	g__Deinococcus	s__unclassified_g__Deinococcus	OTU6046	1	0	1	0	0	0	2	0	0	1	0	0	0	0	1	1	0	0	0	0	7
d__Bacteria	k__norank_d__Bacteria	p__Desulfobacterota	c__Desulfuromonadia	o__PB19	f__norank_o__PB19	g__norank_f__norank_o__PB19	s__uncultured_bacterium_g__norank_f__norank_o__PB19	OTU2184	1	0	0	0	1	1	0	0	0	2	0	0	0	0	0	0	0	0	0	0	5
d__Bacteria	k__norank_d__Bacteria	p__Chloroflexi	c__Anaerolineae	o__SBR1031	f__norank_o__SBR1031	g__norank_f__norank_o__SBR1031	s__unclassified_g__norank_f__norank_o__SBR1031	OTU5850	0	0	0	0	1	0	0	0	0	1	0	0	0	0	0	0	0	0	0	0	2
d__Bacteria	k__norank_d__Bacteria	p__WPS-2	c__norank_p__WPS-2	o__norank_c__norank_p__WPS-2	f__norank_o__norank_c__norank_p__WPS-2	g__norank_f__norank_o__norank_c__norank_p__WPS-2	s__bacterium_ADurb.Bin236	OTU3861	0	0	0	0	0	0	1	1	0	1	0	0	0	0	0	0	1	0	0	0	4
d__Bacteria	k__norank_d__Bacteria	p__Hydrogenedentes	c__Hydrogenedentia	o__Hydrogenedentiales	f__Hydrogenedensaceae	g__norank_f__Hydrogenedensaceae	s__uncultured_Fusobacteria_bacterium_g__norank	OTU1032	0	1	2	0	0	0	0	0	0	0	0	0	0	0	0	0	0	0	0	0	3
d__Bacteria	k__norank_d__Bacteria	p__Chloroflexi	c__Anaerolineae	o__Ardenticatenales	f__norank_o__Ardenticatenales	g__norank_f__norank_o__Ardenticatenales	s__uncultured_bacterium_g__norank_f__norank_o__Ardenticatenales	OTU5486	6	1	2	1	2	3	8	9	8	18	0	0	0	0	0	0	0	0	0	0	58
d__Bacteria	k__norank_d__Bacteria	p__MBNT15	c__norank_p__MBNT15	o__norank_c__norank_p__MBNT15	f__norank_o__norank_c__norank_p__MBNT15	g__norank_f__norank_o__norank_c__norank_p__MBNT15	s__unclassified_g__norank_f__norank_o__norank_c__norank_p__MBNT15	OTU5087	0	0	0	0	0	0	1	0	3	0	0	0	0	0	0	0	0	0	0	0	4
d__Bacteria	k__norank_d__Bacteria	p__Actinobacteriota	c__Actinobacteria	o__Micromonosporales	f__Micromonosporaceae	g__Luedemannella	s__uncultured_bacterium_g__Luedemannella	OTU4684	31	37	5	8	38	57	37	20	17	11	0	0	0	3	0	0	1	0	3	0	268
d__Bacteria	k__norank_d__Bacteria	p__Proteobacteria	c__Gammaproteobacteria	o__Gammaproteobacteria_Incertae_Sedis	f__unclassified_o__Gammaproteobacteria_Incertae_Sedis	g__norank_f__unclassified	s__unclassified_g__norank_f__unclassified	OTU7277	0	0	0	0	0	0	0	0	0	0	0	0	0	1	1	0	0	0	0	0	2
d__Bacteria	k__norank_d__Bacteria	p__Patescibacteria	c__Gracilibacteria	o__norank_c__Gracilibacteria	f__norank_o__norank_c__Gracilibacteria	g__norank_f__norank_o__norank_c__Gracilibacteria	s__wastewater_metagenome_g__norank_f__norank_o__norank	OTU7490	0	1	0	0	0	0	0	0	0	1	0	1	0	0	0	5	6	0	1	2	17
d__Bacteria	k__norank_d__Bacteria	p__Latescibacterota	c__norank_p__Latescibacterota	o__norank_c__norank_p__Latescibacterota	f__norank_o__norank_c__norank_p__Latescibacterota	g__norank_f__norank_o__norank_c__norank_p__Latescibacterota	s__unclassified_g__norank_f__norank_o__norank_c__norank_p__Latescibacterota	OTU6302	3	1	2	0	0	1	1	2	1	1	0	0	0	0	0	0	0	0	0	0	12
d__Bacteria	k__norank_d__Bacteria	p__Proteobacteria	c__Alphaproteobacteria	o__Rickettsiales	f__Mitochondria	g__norank_f__Mitochondria	s__metagenome_g__norank_f__Mitochondria	OTU6972	0	0	0	0	0	0	0	0	0	0	1	1	1	0	0	0	0	0	0	0	3
d__Bacteria	k__norank_d__Bacteria	p__Desulfobacterota	c__Desulfobacteria	o__Desulfobacterales	f__Desulfosarcinaceae	g__norank_f__Desulfosarcinaceae	s__unclassified_g__norank_f__Desulfosarcinaceae	OTU2035	0	0	0	0	1	0	0	0	1	0	0	0	0	0	0	0	0	0	0	0	2
d__Bacteria	k__norank_d__Bacteria	p__Proteobacteria	c__Gammaproteobacteria	o__Competibacterales	f__Competibacteraceae	g__Candidatus_Competibacter	s__unclassified_g__Candidatus_Competibacter	OTU5296	4	3	4	7	1	0	4	2	19	5	0	0	0	0	0	0	0	0	0	0	49
d__Bacteria	k__norank_d__Bacteria	p__Proteobacteria	c__Alphaproteobacteria	o__Rhodobacterales	f__Rhodobacteraceae	g__Rubellimicrobium	s__unclassified_g__Rubellimicrobium	OTU8796	4	4	8	12	6	2	3	10	0	14	2	2	3	2	1	4	5	3	4	17	106
d__Bacteria	k__norank_d__Bacteria	p__Chloroflexi	c__Anaerolineae	o__SBR1031	f__norank_o__SBR1031	g__norank_f__norank_o__SBR1031	s__uncultured_bacterium_g__norank_f__norank_o__SBR1031	OTU4174	0	0	0	0	1	1	0	0	0	0	0	0	0	0	0	0	0	0	0	0	2
d__Bacteria	k__norank_d__Bacteria	p__Cyanobacteria	c__Cyanobacteriia	o__Synechococcales	f__Cyanobiaceae	g__Cyanobium_PCC-6307	s__unclassified_g__Cyanobium_PCC-6307	OTU7399	3	0	3	1	0	0	1	1	0	0	146	216	89	49	77	51	43	10	11	12	713
d__Bacteria	k__norank_d__Bacteria	p__Proteobacteria	c__Gammaproteobacteria	o__Burkholderiales	f__Methylophilaceae	g__norank_f__Methylophilaceae	s__uncultured_bacterium_g__norank_f__Methylophilaceae	OTU6559	0	0	0	0	0	0	0	0	0	0	10	13	15	10	9	5	0	23	9	14	108
d__Bacteria	k__norank_d__Bacteria	p__Fibrobacterota	c__Fibrobacteria	o__Fibrobacterales	f__Fibrobacteraceae	g__unclassified_f__Fibrobacteraceae	s__unclassified_f__Fibrobacteraceae	OTU8765	0	0	0	0	0	0	0	0	0	0	0	0	0	0	0	1	0	0	1	1	3
d__Bacteria	k__norank_d__Bacteria	p__Acidobacteriota	c__Subgroup_18	o__norank_c__Subgroup_18	f__norank_o__norank_c__Subgroup_18	g__norank_f__norank_o__norank_c__Subgroup_18	s__uncultured_bacterium_g__norank_f__norank_o__norank_c__Subgroup_18	OTU2511	0	0	0	0	0	4	1	0	0	1	0	0	0	0	0	0	0	0	0	0	6
d__Bacteria	k__norank_d__Bacteria	p__Firmicutes	c__Clostridia	o__norank_c__Clostridia	f__Hungateiclostridiaceae	g__unclassified_f__Hungateiclostridiaceae	s__unclassified_f__Hungateiclostridiaceae	OTU2902	0	2	0	0	0	1	0	0	0	0	0	0	0	0	0	0	0	0	0	0	3
d__Bacteria	k__norank_d__Bacteria	p__SAR324_cladeMarine_group_B	c__norank_p__SAR324_cladeMarine_group_B	o__norank_c__norank_p__SAR324_cladeMarine_group_B	f__norank_o__norank_c__norank_p__SAR324_cladeMarine_group_B	g__norank_f__norank_o__norank_c__norank_p__SAR324_cladeMarine_group_B	s__unclassified_g__norank_f__norank_o__norank_c__norank_p__SAR324_cladeMarine_group_B	OTU4631	0	0	1	1	0	0	0	2	0	2	0	0	0	0	0	1	1	0	0	1	9
d__Bacteria	k__norank_d__Bacteria	p__Verrucomicrobiota	c__Chlamydiae	o__Chlamydiales	f__Parachlamydiaceae	g__Neochlamydia	s__uncultured_bacterium_g__Neochlamydia	OTU6529	0	0	0	0	0	0	0	1	0	1	0	0	0	0	0	0	0	0	0	0	2
d__Bacteria	k__norank_d__Bacteria	p__Chloroflexi	c__Anaerolineae	o__RBG-13-54-9	f__norank_o__RBG-13-54-9	g__norank_f__norank_o__RBG-13-54-9	s__unclassified_g__norank_f__norank_o__RBG-13-54-9	OTU2427	0	0	0	0	0	10	0	0	0	0	0	0	0	0	0	0	0	0	0	0	10
d__Bacteria	k__norank_d__Bacteria	p__Verrucomicrobiota	c__Lentisphaeria	o__Oligosphaerales	f__Lenti-02	g__norank_f__Lenti-02	s__uncultured_Verrucomicrobia_bacterium_g__norank	OTU1715	0	4	2	8	0	0	7	0	1	0	0	0	1	0	1	0	0	0	0	0	24
d__Bacteria	k__norank_d__Bacteria	p__Chloroflexi	c__Anaerolineae	o__norank_c__Anaerolineae	f__norank_o__norank_c__Anaerolineae	g__norank_f__norank_o__norank_c__Anaerolineae	s__uncultured_bacterium_g__norank_f__norank_o__norank_c__Anaerolineae	OTU5493	0	0	0	0	0	0	0	0	3	0	0	0	0	0	0	0	0	0	0	0	3
d__Bacteria	k__norank_d__Bacteria	p__Planctomycetota	c__Planctomycetes	o__Isosphaerales	f__Isosphaeraceae	g__Tundrisphaera	s__uncultured_bacterium_g__Tundrisphaera	OTU6488	3	0	2	0	0	0	0	0	0	1	0	0	0	0	0	0	0	0	0	0	6
d__Bacteria	k__norank_d__Bacteria	p__Cyanobacteria	c__Cyanobacteriia	o__Leptolyngbyales	f__Leptolyngbyaceae	g__Alkalinema_CENA528	s__Alkalinema_pantanalense_CENA528	OTU8991	0	0	0	0	0	0	0	0	0	0	0	0	0	0	0	3	2	0	1	1	7
d__Bacteria	k__norank_d__Bacteria	p__Latescibacterota	c__Latescibacteria	o__Latescibacterales	f__Latescibacteraceae	g__norank_f__Latescibacteraceae	s__uncultured_actinobacterium_g__norank_f__Latescibacteraceae	OTU2125	2	0	1	0	1	0	0	1	16	0	0	0	0	0	0	0	0	0	0	0	21
d__Bacteria	k__norank_d__Bacteria	p__Bdellovibrionota	c__Bdellovibrionia	o__Bdellovibrionales	f__Bdellovibrionaceae	g__Bdellovibrio	s__unclassified_g__Bdellovibrio	OTU4926	1	2	0	3	2	0	0	1	0	0	1	0	0	0	0	0	0	0	0	1	11
d__Bacteria	k__norank_d__Bacteria	p__Bacteroidota	c__Bacteroidia	o__Sphingobacteriales	f__NS11-12_marine_group	g__norank_f__NS11-12_marine_group	s__uncultured_bacterium_g__norank_f__NS11-12_marine_group	OTU8060	0	0	0	0	0	0	0	0	0	0	2	0	0	0	0	0	0	3	0	0	5
d__Bacteria	k__norank_d__Bacteria	p__Proteobacteria	c__Gammaproteobacteria	o__Burkholderiales	f__Nitrosomonadaceae	g__mle1-7	s__unclassified_g__mle1-7	OTU6157	10	1	0	3	0	9	4	8	0	6	0	0	0	0	0	0	0	0	1	0	42
d__Bacteria	k__norank_d__Bacteria	p__Chloroflexi	c__Anaerolineae	o__Anaerolineales	f__Anaerolineaceae	g__Leptolinea	s__uncultured_soil_bacterium_g__Leptolinea	OTU510	0	1	1	0	0	0	1	0	0	0	0	0	0	0	0	0	0	0	0	0	3
d__Bacteria	k__norank_d__Bacteria	p__Proteobacteria	c__Alphaproteobacteria	o__Tistrellales	f__Geminicoccaceae	g__Candidatus_Alysiosphaera	s__metagenome_g__Candidatus_Alysiosphaera	OTU1013	8	3	4	4	2	0	3	2	0	2	0	0	0	0	0	1	1	0	0	0	30
d__Bacteria	k__norank_d__Bacteria	p__Myxococcota	c__Polyangia	o__Polyangiales	f__Polyangiaceae	g__Pajaroellobacter	s__unclassified_g__Pajaroellobacter	OTU218	3	0	0	0	2	3	0	0	0	0	0	0	0	0	0	0	0	0	0	0	8
d__Bacteria	k__norank_d__Bacteria	p__Actinobacteriota	c__Actinobacteria	o__Propionibacteriales	f__Nocardioidaceae	g__Nocardioides	s__unclassified_g__Nocardioides	OTU1253	39	45	96	45	33	41	19	26	2	20	2	0	0	3	1	2	8	8	6	1	397
d__Bacteria	k__norank_d__Bacteria	p__Latescibacterota	c__norank_p__Latescibacterota	o__norank_c__norank_p__Latescibacterota	f__norank_o__norank_c__norank_p__Latescibacterota	g__norank_f__norank_o__norank_c__norank_p__Latescibacterota	s__unclassified_g__norank_f__norank_o__norank_c__norank_p__Latescibacterota	OTU4659	0	0	2	1	0	0	0	2	0	0	0	0	0	0	0	0	0	0	0	0	5
d__Bacteria	k__norank_d__Bacteria	p__Methylomirabilota	c__Methylomirabilia	o__Rokubacteriales	f__norank_o__Rokubacteriales	g__norank_f__norank_o__Rokubacteriales	s__uncultured_bacterium_g__norank_f__norank_o__Rokubacteriales	OTU2474	4	0	0	0	1	7	2	1	0	0	0	0	0	0	0	0	0	0	0	0	15
d__Bacteria	k__norank_d__Bacteria	p__Actinobacteriota	c__Actinobacteria	o__Micrococcales	f__Dermatophilaceae	g__norank_f__Dermatophilaceae	s__metagenome_g__norank_f__Dermatophilaceae	OTU767	0	1	0	0	0	0	1	1	1	1	0	0	1	0	1	0	0	0	0	0	7
d__Bacteria	k__norank_d__Bacteria	p__Chloroflexi	c__Anaerolineae	o__SBR1031	f__A4b	g__norank_f__A4b	s__unclassified_g__norank_f__A4b	OTU6361	2	0	4	1	1	2	2	1	13	9	0	0	0	0	0	0	0	0	0	0	35
d__Bacteria	k__norank_d__Bacteria	p__Patescibacteria	c__Parcubacteria	o__Candidatus_Kaiserbacteria	f__norank_o__Candidatus_Kaiserbacteria	g__norank_f__norank_o__Candidatus_Kaiserbacteria	s__uncultured_bacterium_g__norank_f__norank_o__Candidatus_Kaiserbacteria	OTU6711	0	0	0	0	0	0	0	0	0	0	1	0	0	1	0	0	0	0	0	0	2
d__Bacteria	k__norank_d__Bacteria	p__Proteobacteria	c__Gammaproteobacteria	o__Cellvibrionales	f__Porticoccaceae	g__C1-B045	s__uncultured_bacterium_g__C1-B045	OTU5956	1	1	0	3	1	2	0	4	2	3	0	0	0	0	0	1	2	1	5	0	26
d__Bacteria	k__norank_d__Bacteria	p__Acidobacteriota	c__Holophagae	o__Subgroup_7	f__norank_o__Subgroup_7	g__norank_f__norank_o__Subgroup_7	s__uncultured_soil_bacterium_g__norank_f__norank_o__Subgroup_7	OTU4391	0	1	1	0	1	0	2	1	0	3	0	0	0	0	0	0	0	0	0	0	9
d__Bacteria	k__norank_d__Bacteria	p__Firmicutes	c__unclassified_p__Firmicutes	o__unclassified_p__Firmicutes	f__unclassified_p__Firmicutes	g__unclassified_p__Firmicutes	s__unclassified_p__Firmicutes	OTU6169	1	1	1	1	0	0	0	0	0	1	0	0	0	0	0	1	3	0	0	0	9
d__Bacteria	k__norank_d__Bacteria	p__Patescibacteria	c__Parcubacteria	o__Candidatus_Terrybacteria	f__norank_o__Candidatus_Terrybacteria	g__norank_f__norank_o__Candidatus_Terrybacteria	s__uncultured_bacterium_g__norank_f__norank_o__Candidatus_Terrybacteria	OTU284	2	0	0	1	0	0	0	0	0	0	0	0	0	0	0	0	0	0	0	0	3
d__Bacteria	k__norank_d__Bacteria	p__Proteobacteria	c__Gammaproteobacteria	o__Burkholderiales	f__TRA3-20	g__norank_f__TRA3-20	s__unclassified_g__norank_f__TRA3-20	OTU6227	4	1	1	1	3	2	0	0	0	0	0	0	0	0	0	0	0	0	0	0	12
d__Bacteria	k__norank_d__Bacteria	p__Desulfobacterota	c__Desulfobacteria	o__Desulfobacterales	f__Desulfosarcinaceae	g__norank_f__Desulfosarcinaceae	s__unclassified_g__norank_f__Desulfosarcinaceae	OTU5919	0	0	1	2	0	0	4	0	4	15	0	1	0	0	0	0	0	0	0	2	29
d__Bacteria	k__norank_d__Bacteria	p__Acidobacteriota	c__Thermoanaerobaculia	o__Thermoanaerobaculales	f__Thermoanaerobaculaceae	g__Subgroup_10	s__unclassified_g__Subgroup_10	OTU4522	0	0	0	0	2	1	0	1	3	0	0	0	0	0	0	0	0	0	0	0	7
d__Bacteria	k__norank_d__Bacteria	p__Chloroflexi	c__Anaerolineae	o__1-20	f__norank_o__1-20	g__norank_f__norank_o__1-20	s__metagenome_g__norank_f__norank_o__1-20	OTU599	2	1	2	0	1	0	1	0	0	0	0	0	0	0	0	0	0	0	0	0	7
d__Bacteria	k__norank_d__Bacteria	p__Acidobacteriota	c__Thermoanaerobaculia	o__Thermoanaerobaculales	f__Thermoanaerobaculaceae	g__Subgroup_10	s__unclassified_g__Subgroup_10	OTU4527	0	1	4	1	0	0	0	1	0	2	0	0	0	0	0	0	0	0	0	0	9
d__Bacteria	k__norank_d__Bacteria	p__unclassified_k__norank_d__Bacteria	c__unclassified_k__norank_d__Bacteria	o__unclassified_k__norank_d__Bacteria	f__unclassified_k__norank_d__Bacteria	g__unclassified_k__norank_d__Bacteria	s__unclassified_k__norank_d__Bacteria	OTU3509	0	0	0	0	0	0	0	1	1	0	0	0	0	0	0	0	0	0	0	0	2
d__Bacteria	k__norank_d__Bacteria	p__Cloacimonadota	c__Cloacimonadia	o__Cloacimonadales	f__PBS-18	g__norank_f__PBS-18	s__uncultured_bacterium_g__norank_f__PBS-18	OTU1184	0	0	2	0	1	1	2	0	1	0	0	0	0	0	0	0	0	0	0	0	7
d__Bacteria	k__norank_d__Bacteria	p__Cyanobacteria	c__Cyanobacteriia	o__Chloroplast	f__norank_o__Chloroplast	g__norank_f__norank_o__Chloroplast	s__unclassified_g__norank_f__norank_o__Chloroplast	OTU9021	0	0	0	0	0	0	0	0	0	0	0	1	0	0	1	1	1	0	0	0	4
d__Bacteria	k__norank_d__Bacteria	p__Chloroflexi	c__Anaerolineae	o__RBG-13-54-9	f__norank_o__RBG-13-54-9	g__norank_f__norank_o__RBG-13-54-9	s__uncultured_Chloroflexi_bacterium_g__norank_f__norank_o__RBG-13-54-9	OTU3678	0	0	0	1	2	0	3	1	0	1	0	0	0	0	0	0	0	0	0	0	8
d__Bacteria	k__norank_d__Bacteria	p__Proteobacteria	c__Gammaproteobacteria	o__Burkholderiales	f__Rhodocyclaceae	g__Niveibacterium	s__beta_proteobacterium_IMCC1729	OTU8360	0	0	0	0	0	0	0	0	0	0	0	1	1	0	1	1	0	3	0	2	9
d__Bacteria	k__norank_d__Bacteria	p__Patescibacteria	c__unclassified_p__Patescibacteria	o__unclassified_p__Patescibacteria	f__unclassified_p__Patescibacteria	g__unclassified_p__Patescibacteria	s__unclassified_p__Patescibacteria	OTU4308	1	0	1	2	1	0	0	3	0	0	0	0	0	0	0	0	0	0	0	0	8
d__Bacteria	k__norank_d__Bacteria	p__SAR324_cladeMarine_group_B	c__norank_p__SAR324_cladeMarine_group_B	o__norank_c__norank_p__SAR324_cladeMarine_group_B	f__norank_o__norank_c__norank_p__SAR324_cladeMarine_group_B	g__norank_f__norank_o__norank_c__norank_p__SAR324_cladeMarine_group_B	s__unclassified_g__norank_f__norank_o__norank_c__norank_p__SAR324_cladeMarine_group_B	OTU2027	0	0	0	0	3	1	0	0	0	0	0	0	0	0	0	1	0	0	0	0	5
d__Bacteria	k__norank_d__Bacteria	p__Chloroflexi	c__Chloroflexia	o__Thermomicrobiales	f__JG30-KF-CM45	g__norank_f__JG30-KF-CM45	s__uncultured_Chloroflexi_bacterium_g__norank_f__JG30-KF-CM45	OTU3181	3	0	0	0	0	6	4	0	1	0	0	0	0	0	0	0	0	0	0	1	15
d__Bacteria	k__norank_d__Bacteria	p__Bacteroidota	c__Kryptonia	o__Kryptoniales	f__MSB-3C8	g__norank_f__MSB-3C8	s__uncultured_bacterium_g__norank_f__MSB-3C8	OTU4967	0	1	0	0	1	0	1	0	0	0	0	0	0	0	0	0	0	0	0	0	3
d__Bacteria	k__norank_d__Bacteria	p__Firmicutes	c__Negativicutes	o__Veillonellales-Selenomonadales	f__Selenomonadaceae	g__Selenomonas	s__Selenomonas_lacticifex	OTU6664	0	0	3	0	0	0	0	0	0	0	7	11	16	3	13	2	11	13	11	30	120
d__Bacteria	k__norank_d__Bacteria	p__Proteobacteria	c__Alphaproteobacteria	o__Rhizobiales	f__Labraceae	g__Labrys	s__metagenome_g__Labrys	OTU4137	12	4	8	7	13	6	3	7	2	2	0	0	0	0	0	0	0	0	2	1	67
d__Bacteria	k__norank_d__Bacteria	p__Firmicutes	c__Clostridia	o__Clostridiales	f__Clostridiaceae	g__Clostridium_sensu_stricto_1	s__unclassified_g__Clostridium_sensu_stricto_1	OTU584	0	1	0	1	0	0	3	1	0	0	0	2	0	0	0	0	0	0	0	1	9
d__Bacteria	k__norank_d__Bacteria	p__Chloroflexi	c__Anaerolineae	o__RBG-13-54-9	f__norank_o__RBG-13-54-9	g__norank_f__norank_o__RBG-13-54-9	s__unclassified_g__norank_f__norank_o__RBG-13-54-9	OTU3331	0	0	1	0	0	0	1	1	0	0	0	0	0	1	0	0	0	0	0	0	4
d__Bacteria	k__norank_d__Bacteria	p__Proteobacteria	c__Gammaproteobacteria	o__Burkholderiales	f__Oxalobacteraceae	g__Massilia	s__unclassified_g__Massilia	OTU6162	9	5	13	8	14	1	2	1	0	2	0	0	0	1	1	1	1	7	1	2	69
d__Bacteria	k__norank_d__Bacteria	p__Proteobacteria	c__Gammaproteobacteria	o__Cellvibrionales	f__Cellvibrionaceae	g__Cellvibrio	s__unclassified_g__Cellvibrio	OTU6713	0	0	0	0	0	0	0	1	0	0	1	0	2	1	1	1	0	1	3	4	15
d__Bacteria	k__norank_d__Bacteria	p__Chloroflexi	c__Anaerolineae	o__SBR1031	f__norank_o__SBR1031	g__norank_f__norank_o__SBR1031	s__unclassified_g__norank_f__norank_o__SBR1031	OTU2115	0	0	0	0	2	0	1	0	0	1	0	0	0	0	0	0	0	0	0	0	4
d__Bacteria	k__norank_d__Bacteria	p__Patescibacteria	c__Kazania	o__norank_c__Kazania	f__norank_o__norank_c__Kazania	g__norank_f__norank_o__norank_c__Kazania	s__uncultured_bacterium_g__norank_f__norank_o__norank_c__Kazania	OTU1393	0	0	0	1	1	0	1	0	0	0	0	0	0	0	0	1	1	1	0	1	7
d__Bacteria	k__norank_d__Bacteria	p__Bacteroidota	c__Bacteroidia	o__Chitinophagales	f__Saprospiraceae	g__norank_f__Saprospiraceae	s__unclassified_g__norank_f__Saprospiraceae	OTU1269	0	0	10	9	2	0	0	1	0	0	0	0	0	0	0	0	0	0	0	0	22
d__Bacteria	k__norank_d__Bacteria	p__Proteobacteria	c__Alphaproteobacteria	o__Rhodobacterales	f__Rhodobacteraceae	g__unclassified_f__Rhodobacteraceae	s__unclassified_f__Rhodobacteraceae	OTU242	151	443	212	409	258	55	339	320	68	598	175	149	108	211	152	376	324	98	162	119	4727
d__Bacteria	k__norank_d__Bacteria	p__Patescibacteria	c__CPR2	o__norank_c__CPR2	f__norank_o__norank_c__CPR2	g__norank_f__norank_o__norank_c__CPR2	s__uncultured_Clostridium_sp._g__norank_f__norank_o__norank	OTU3297	0	0	0	0	0	0	3	0	0	0	0	0	0	0	1	0	0	0	1	0	5
d__Bacteria	k__norank_d__Bacteria	p__Proteobacteria	c__Alphaproteobacteria	o__Rhizobiales	f__Rhizobiales_Incertae_Sedis	g__Bauldia	s__metagenome_g__Bauldia	OTU5049	3	1	3	3	7	4	5	5	0	0	0	0	0	1	0	0	0	0	0	0	32
d__Bacteria	k__norank_d__Bacteria	p__Proteobacteria	c__Alphaproteobacteria	o__Paracaedibacterales	f__Paracaedibacteraceae	g__norank_f__Paracaedibacteraceae	s__unclassified_g__norank_f__Paracaedibacteraceae	OTU8871	0	0	0	0	0	0	0	0	0	0	0	0	1	0	0	0	0	0	0	1	2
d__Bacteria	k__norank_d__Bacteria	p__Proteobacteria	c__Gammaproteobacteria	o__Pseudomonadales	f__Pseudomonadaceae	g__Pseudomonas	s__unclassified_g__Pseudomonas	OTU6729	1	19	8	7	3	0	1	0	1	2	24	30	30	29	25	2	2	2	4	1	191
d__Bacteria	k__norank_d__Bacteria	p__Bacteroidota	c__Bacteroidia	o__Bacteroidales	f__norank_o__Bacteroidales	g__norank_f__norank_o__Bacteroidales	s__uncultured_bacterium_g__norank_f__norank_o__Bacteroidales	OTU8787	0	0	0	0	0	0	0	0	0	0	1	0	1	3	4	2	1	1	0	4	17
d__Bacteria	k__norank_d__Bacteria	p__Proteobacteria	c__Alphaproteobacteria	o__Reyranellales	f__Reyranellaceae	g__Reyranella	s__metagenome_g__Reyranella	OTU1928	14	5	4	3	22	6	3	2	4	5	1	1	0	0	1	4	4	1	4	1	85
d__Bacteria	k__norank_d__Bacteria	p__Actinobacteriota	c__Actinobacteria	o__Propionibacteriales	f__Nocardioidaceae	g__Nocardioides	s__unclassified_g__Nocardioides	OTU6782	0	0	0	0	0	0	0	0	0	0	0	1	0	0	0	0	0	0	1	0	2
d__Bacteria	k__norank_d__Bacteria	p__Proteobacteria	c__Gammaproteobacteria	o__Burkholderiales	f__Oxalobacteraceae	g__unclassified_f__Oxalobacteraceae	s__unclassified_f__Oxalobacteraceae	OTU8971	0	4	12	7	6	2	2	1	0	4	25	41	29	33	32	206	150	87	68	73	782
d__Bacteria	k__norank_d__Bacteria	p__Bacteroidota	c__Kryptonia	o__Kryptoniales	f__BSV26	g__norank_f__BSV26	s__uncultured_Chlorobi_bacterium_g__norank_f__BSV26	OTU7466	1	1	0	2	8	0	6	3	8	4	0	0	0	0	2	0	0	0	0	0	35
d__Bacteria	k__norank_d__Bacteria	p__Planctomycetota	c__OM190	o__norank_c__OM190	f__norank_o__norank_c__OM190	g__norank_f__norank_o__norank_c__OM190	s__uncultured_bacterium_g__norank_f__norank_o__norank_c__OM190	OTU1367	4	1	5	0	0	0	0	0	0	0	0	0	0	0	0	0	0	0	0	0	10
d__Bacteria	k__norank_d__Bacteria	p__Spirochaetota	c__Spirochaetia	o__Spirochaetales	f__Spirochaetaceae	g__Spirochaeta	s__uncultured_soil_bacterium_g__Spirochaeta	OTU5398	0	0	1	2	1	1	3	4	55	1	0	0	0	0	0	0	0	0	0	0	68
d__Bacteria	k__norank_d__Bacteria	p__Proteobacteria	c__Alphaproteobacteria	o__Rickettsiales	f__Anaplasmataceae	g__Candidatus_Xenohaliotis	s__uncultured_bacterium_g__Candidatus_Xenohaliotis	OTU6946	0	0	0	0	0	0	0	0	0	0	2	0	0	0	0	0	0	0	0	0	2
d__Bacteria	k__norank_d__Bacteria	p__Actinobacteriota	c__Thermoleophilia	o__norank_c__Thermoleophilia	f__norank_o__norank_c__Thermoleophilia	g__norank_f__norank_o__norank_c__Thermoleophilia	s__uncultured_bacterium_g__norank_f__norank_o__norank_c__Thermoleophilia	OTU5287	3	0	1	3	3	18	5	1	12	2	0	0	0	1	0	0	0	1	0	1	51
d__Bacteria	k__norank_d__Bacteria	p__Bacteroidota	c__Bacteroidia	o__Chitinophagales	f__Saprospiraceae	g__norank_f__Saprospiraceae	s__uncultured_Saprospiraceae_bacterium_g__norank	OTU1697	0	0	0	1	0	0	0	0	0	0	0	0	0	0	0	0	0	0	0	0	1
d__Bacteria	k__norank_d__Bacteria	p__Proteobacteria	c__Gammaproteobacteria	o__unclassified_c__Gammaproteobacteria	f__unclassified_c__Gammaproteobacteria	g__unclassified_c__Gammaproteobacteria	s__unclassified_c__Gammaproteobacteria	OTU658	0	2	0	0	0	0	0	0	0	0	0	0	0	0	0	0	0	0	0	0	2
d__Bacteria	k__norank_d__Bacteria	p__Acidobacteriota	c__Holophagae	o__Holophagales	f__Holophagaceae	g__norank_f__Holophagaceae	s__uncultured_Acidobacteriaceae_bacterium_g__norank_f__Holophagaceae	OTU5791	1	3	1	3	0	0	3	1	0	0	0	0	0	0	0	0	0	0	0	0	12
d__Bacteria	k__norank_d__Bacteria	p__Bacteroidota	c__Bacteroidia	o__Cytophagales	f__Hymenobacteraceae	g__Adhaeribacter	s__unclassified_g__Adhaeribacter	OTU1972	1	0	0	2	1	0	0	0	0	0	0	0	0	0	0	0	0	0	0	0	4
d__Bacteria	k__norank_d__Bacteria	p__Spirochaetota	c__Spirochaetia	o__Spirochaetales	f__Spirochaetaceae	g__norank_f__Spirochaetaceae	s__uncultured_soil_bacterium_g__norank_f__Spirochaetaceae	OTU3392	0	0	0	1	0	0	7	0	0	0	0	0	0	0	0	0	0	0	0	0	8
d__Bacteria	k__norank_d__Bacteria	p__Patescibacteria	c__WWE3	o__norank_c__WWE3	f__norank_o__norank_c__WWE3	g__norank_f__norank_o__norank_c__WWE3	s__bacterium_enrichment_culture_clone_EBa3	OTU7359	3	0	0	0	0	0	0	0	0	0	4	1	0	0	1	1	0	1	1	0	12
d__Bacteria	k__norank_d__Bacteria	p__Patescibacteria	c__CPR2	o__norank_c__CPR2	f__norank_o__norank_c__CPR2	g__norank_f__norank_o__norank_c__CPR2	s__uncultured_bacterium_g__norank_f__norank_o__norank_c__CPR2	OTU771	1	1	0	1	0	0	0	0	0	0	0	0	0	0	0	0	0	0	0	0	3
d__Bacteria	k__norank_d__Bacteria	p__Deferrisomatota	c__Defferrisomatia	o__Defferrisomatales	f__Defferrisomataceae	g__Deferrisoma	s__uncultured_delta_proteobacterium_g__Deferrisoma	OTU5806	1	1	0	0	3	3	0	1	0	3	0	0	0	0	0	0	0	0	0	0	12
d__Bacteria	k__norank_d__Bacteria	p__Cloacimonadota	c__Cloacimonadia	o__Cloacimonadales	f__unclassified_o__Cloacimonadales	g__unclassified_o__Cloacimonadales	s__unclassified_o__Cloacimonadales	OTU5123	0	0	0	0	0	0	0	0	1	0	0	0	0	0	0	0	0	0	0	0	1
d__Bacteria	k__norank_d__Bacteria	p__Bacteroidota	c__Kryptonia	o__Kryptoniales	f__BSV26	g__norank_f__BSV26	s__uncultured_Chlorobi_bacterium_g__norank_f__BSV26	OTU3970	0	0	0	0	0	0	0	0	0	0	1	0	0	0	0	0	1	0	0	1	3
d__Bacteria	k__norank_d__Bacteria	p__Actinobacteriota	c__Thermoleophilia	o__Solirubrobacterales	f__67-14	g__norank_f__67-14	s__unclassified_g__norank_f__67-14	OTU2812	7	1	6	2	4	7	13	6	4	4	0	1	0	4	0	0	0	1	0	0	60
d__Bacteria	k__norank_d__Bacteria	p__Patescibacteria	c__CPR2	o__norank_c__CPR2	f__norank_o__norank_c__CPR2	g__norank_f__norank_o__norank_c__CPR2	s__uncultured_Clostridium_sp._g__norank_f__norank_o__norank	OTU7592	0	0	1	2	1	0	4	1	0	1	0	0	1	0	0	0	0	0	0	0	11
d__Bacteria	k__norank_d__Bacteria	p__Chloroflexi	c__Anaerolineae	o__Caldilineales	f__Caldilineaceae	g__norank_f__Caldilineaceae	s__uncultured_bacterium_g__norank_f__Caldilineaceae	OTU2424	1	0	2	1	8	2	1	0	0	1	1	0	0	0	0	0	0	0	0	0	17
d__Bacteria	k__norank_d__Bacteria	p__Proteobacteria	c__Alphaproteobacteria	o__Rickettsiales	f__Mitochondria	g__norank_f__Mitochondria	s__Spirogyra_sp._CLP-2000	OTU4904	0	0	0	0	0	0	0	4	0	0	0	0	0	0	0	0	0	0	1	0	5
d__Bacteria	k__norank_d__Bacteria	p__Firmicutes	c__Clostridia	o__Oscillospirales	f__Ruminococcaceae	g__Ruminococcus	s__metagenome_g__Ruminococcus	OTU3421	1	0	1	0	0	0	1	1	1	0	0	1	0	0	0	0	0	0	0	0	6
d__Bacteria	k__norank_d__Bacteria	p__Proteobacteria	c__Alphaproteobacteria	o__Rhizobiales	f__Beijerinckiaceae	g__Roseiarcus	s__uncultured_bacterium_g__Roseiarcus	OTU626	0	1	0	0	0	0	4	0	0	1	0	0	0	0	0	0	0	0	0	0	6
d__Bacteria	k__norank_d__Bacteria	p__Acidobacteriota	c__Vicinamibacteria	o__Vicinamibacterales	f__Vicinamibacteraceae	g__Luteitalea	s__uncultured_Acidobacteria_bacterium_g__Luteitalea	OTU4702	0	0	0	0	0	1	0	1	0	0	0	0	0	0	0	0	0	0	0	0	2
d__Bacteria	k__norank_d__Bacteria	p__Actinobacteriota	c__Acidimicrobiia	o__Actinomarinales	f__norank_o__Actinomarinales	g__norank_f__norank_o__Actinomarinales	s__unclassified_g__norank_f__norank_o__Actinomarinales	OTU1908	0	0	0	2	1	0	0	0	0	0	0	0	0	0	0	0	0	0	0	0	3
d__Bacteria	k__norank_d__Bacteria	p__Patescibacteria	c__Saccharimonadia	o__Saccharimonadales	f__norank_o__Saccharimonadales	g__norank_f__norank_o__Saccharimonadales	s__unclassified_g__norank_f__norank_o__Saccharimonadales	OTU1208	59	10	48	11	10	0	4	0	0	0	4	3	1	8	1	0	0	0	0	0	159
d__Bacteria	k__norank_d__Bacteria	p__Actinobacteriota	c__Thermoleophilia	o__Solirubrobacterales	f__Solirubrobacteraceae	g__Solirubrobacter	s__unclassified_g__Solirubrobacter	OTU6081	0	2	1	1	1	3	3	2	1	1	0	0	1	0	0	0	0	0	0	1	17
d__Bacteria	k__norank_d__Bacteria	p__Chloroflexi	c__Anaerolineae	o__SBR1031	f__norank_o__SBR1031	g__norank_f__norank_o__SBR1031	s__unclassified_g__norank_f__norank_o__SBR1031	OTU1135	3	8	3	1	1	2	11	4	28	31	0	0	0	0	0	0	0	0	0	0	92
d__Bacteria	k__norank_d__Bacteria	p__Gemmatimonadota	c__Gemmatimonadetes	o__Gemmatimonadales	f__Gemmatimonadaceae	g__Gemmatimonas	s__uncultured_bacterium_g__Gemmatimonas	OTU2560	7	1	0	0	1	2	0	2	0	0	0	0	0	0	0	0	0	0	0	0	13
d__Bacteria	k__norank_d__Bacteria	p__Bacteroidota	c__Bacteroidia	o__Flavobacteriales	f__Cryomorphaceae	g__norank_f__Cryomorphaceae	s__uncultured_Cryomorphaceae_bacterium_g__norank	OTU7185	0	0	0	0	0	0	0	0	0	0	14	15	27	18	15	2	4	4	4	4	107
d__Bacteria	k__norank_d__Bacteria	p__Desulfobacterota	c__Desulfuromonadia	o__Geobacterales	f__Geobacteraceae	g__unclassified_f__Geobacteraceae	s__unclassified_f__Geobacteraceae	OTU1623	0	0	1	2	0	1	7	1	0	0	0	0	0	0	0	0	0	0	0	0	12
d__Bacteria	k__norank_d__Bacteria	p__FCPU426	c__norank_p__FCPU426	o__norank_c__norank_p__FCPU426	f__norank_o__norank_c__norank_p__FCPU426	g__norank_f__norank_o__norank_c__norank_p__FCPU426	s__uncultured_microorganism_g__norank_f__norank_o__norank	OTU2786	0	0	0	0	0	2	0	0	0	0	0	0	0	0	0	0	0	0	0	0	2
d__Bacteria	k__norank_d__Bacteria	p__Cyanobacteria	c__Vampirivibrionia	o__Gastranaerophilales	f__norank_o__Gastranaerophilales	g__norank_f__norank_o__Gastranaerophilales	s__uncultured_organism_g__norank_f__norank_o__Gastranaerophilales	OTU3758	0	3	0	4	0	0	2	0	0	0	0	0	0	0	0	0	0	0	0	1	10
d__Bacteria	k__norank_d__Bacteria	p__Bacteroidota	c__Bacteroidia	o__Bacteroidales	f__Prevotellaceae	g__Prevotella	s__unclassified_g__Prevotella	OTU1969	0	0	0	0	1	0	0	0	0	1	0	1	1	1	0	0	1	0	0	0	6
d__Bacteria	k__norank_d__Bacteria	p__Proteobacteria	c__Gammaproteobacteria	o__Burkholderiales	f__Nitrosomonadaceae	g__MND1	s__unclassified_g__MND1	OTU3082	0	0	0	0	0	6	1	0	0	0	0	0	0	0	0	0	0	0	0	0	7
d__Bacteria	k__norank_d__Bacteria	p__Actinobacteriota	c__Rubrobacteria	o__Rubrobacterales	f__Rubrobacteriaceae	g__Rubrobacter	s__uncultured_Rubrobacter_sp.	OTU7184	0	0	0	0	0	0	0	0	0	0	0	0	0	5	0	0	0	0	0	0	5
d__Bacteria	k__norank_d__Bacteria	p__Chloroflexi	c__Anaerolineae	o__C10-SB1A	f__norank_o__C10-SB1A	g__norank_f__norank_o__C10-SB1A	s__metagenome_g__norank_f__norank_o__C10-SB1A	OTU905	54	25	149	92	5	1	20	103	0	3	1	3	1	5	0	0	0	0	1	0	463
d__Bacteria	k__norank_d__Bacteria	p__Firmicutes	c__Clostridia	o__Clostridiales	f__Clostridiaceae	g__Clostridium_sensu_stricto_19	s__Clostridium_oryzae	OTU5724	0	0	0	0	0	0	1	0	0	1	0	1	0	0	0	0	0	0	0	0	3
d__Bacteria	k__norank_d__Bacteria	p__Myxococcota	c__Polyangia	o__MidBa8	f__norank_o__MidBa8	g__norank_f__norank_o__MidBa8	s__unclassified_g__norank_f__norank_o__MidBa8	OTU5565	0	0	0	0	0	0	0	0	1	0	0	0	0	0	0	0	0	0	0	0	1
d__Bacteria	k__norank_d__Bacteria	p__Planctomycetota	c__Brocadiae	o__Brocadiales	f__Brocadiaceae	g__Candidatus_Brocadia	s__uncultured_anaerobic_ammonium-oxidizing_bacterium_g__Candidatus_Brocadia	OTU3824	7	3	0	1	3	0	1	0	0	0	0	2	0	0	0	0	0	0	0	0	17
d__Bacteria	k__norank_d__Bacteria	p__Bacteroidota	c__Bacteroidia	o__Sphingobacteriales	f__Lentimicrobiaceae	g__norank_f__Lentimicrobiaceae	s__metagenome_g__norank_f__Lentimicrobiaceae	OTU6185	0	8	3	12	6	0	11	1	9	8	1	0	0	1	2	1	0	0	0	0	63
d__Bacteria	k__norank_d__Bacteria	p__SAR324_cladeMarine_group_B	c__norank_p__SAR324_cladeMarine_group_B	o__norank_c__norank_p__SAR324_cladeMarine_group_B	f__norank_o__norank_c__norank_p__SAR324_cladeMarine_group_B	g__norank_f__norank_o__norank_c__norank_p__SAR324_cladeMarine_group_B	s__uncultured_bacterium_zdt-33i5	OTU7329	0	0	1	0	0	0	0	0	0	0	0	1	0	0	4	0	0	0	2	3	11
d__Bacteria	k__norank_d__Bacteria	p__Chloroflexi	c__JG30-KF-CM66	o__norank_c__JG30-KF-CM66	f__norank_o__norank_c__JG30-KF-CM66	g__norank_f__norank_o__norank_c__JG30-KF-CM66	s__unclassified_g__norank_f__norank_o__norank_c__JG30-KF-CM66	OTU3662	0	0	0	0	0	0	1	0	0	0	0	0	0	0	0	0	0	0	0	0	1
d__Bacteria	k__norank_d__Bacteria	p__Actinobacteriota	c__Thermoleophilia	o__Solirubrobacterales	f__Solirubrobacteraceae	g__unclassified_f__Solirubrobacteraceae	s__unclassified_f__Solirubrobacteraceae	OTU3000	0	0	1	0	0	0	0	1	0	0	0	0	0	0	0	0	0	0	0	0	2
d__Bacteria	k__norank_d__Bacteria	p__Acidobacteriota	c__Aminicenantia	o__Aminicenantales	f__norank_o__Aminicenantales	g__norank_f__norank_o__Aminicenantales	s__uncultured_prokaryote_g__norank_f__norank_o__Aminicenantales	OTU3965	0	0	0	1	1	1	3	0	6	3	0	1	0	0	0	0	0	0	0	0	16
d__Bacteria	k__norank_d__Bacteria	p__Actinobacteriota	c__Thermoleophilia	o__Solirubrobacterales	f__Solirubrobacteraceae	g__norank_f__Solirubrobacteraceae	s__unclassified_g__norank_f__Solirubrobacteraceae	OTU6052	0	5	5	2	1	1	1	0	0	0	0	0	0	1	0	0	0	0	0	0	16
d__Bacteria	k__norank_d__Bacteria	p__Actinobacteriota	c__Coriobacteriia	o__Coriobacteriales	f__unclassified_o__Coriobacteriales	g__unclassified_o__Coriobacteriales	s__unclassified_o__Coriobacteriales	OTU4686	0	0	0	1	0	0	0	2	0	0	0	0	0	0	0	0	0	0	0	0	3
d__Bacteria	k__norank_d__Bacteria	p__Cyanobacteria	c__Cyanobacteriia	o__Cyanobacteriales	f__Chroococcidiopsaceae	g__Chroococcidiopsis_SAG_2023	s__uncultured_bacterium_g__Chroococcidiopsis_SAG_2023	OTU4635	1	3	1	1	0	0	1	0	0	0	0	0	0	1	0	0	0	0	0	0	8
d__Bacteria	k__norank_d__Bacteria	p__Firmicutes	c__Clostridia	o__Oscillospirales	f__Ruminococcaceae	g__Candidatus_Soleaferrea	s__uncultured_bacterium_g__Candidatus_Soleaferrea	OTU8296	0	0	0	0	0	0	0	0	0	0	0	1	0	0	0	0	0	0	1	0	2
d__Bacteria	k__norank_d__Bacteria	p__Chloroflexi	c__Chloroflexia	o__Chloroflexales	f__Roseiflexaceae	g__norank_f__Roseiflexaceae	s__unclassified_g__norank_f__Roseiflexaceae	OTU8089	7	0	1	3	20	2	5	9	0	8	0	1	0	0	0	2	2	1	0	1	62
d__Bacteria	k__norank_d__Bacteria	p__Chloroflexi	c__Anaerolineae	o__Anaerolineales	f__Anaerolineaceae	g__norank_f__Anaerolineaceae	s__unclassified_g__norank_f__Anaerolineaceae	OTU4007	0	0	0	0	0	0	1	0	0	0	0	0	0	0	0	2	0	0	0	0	3
d__Bacteria	k__norank_d__Bacteria	p__Proteobacteria	c__Alphaproteobacteria	o__Acetobacterales	f__Acetobacteraceae	g__Craurococcus-Caldovatus	s__uncultured_bacterium_g__Craurococcus-Caldovatus	OTU1354	1	0	1	0	0	0	0	0	0	0	0	0	0	0	0	0	0	0	0	0	2
d__Bacteria	k__norank_d__Bacteria	p__Chloroflexi	c__KD4-96	o__norank_c__KD4-96	f__norank_o__norank_c__KD4-96	g__norank_f__norank_o__norank_c__KD4-96	s__uncultured_bacterium_g__norank_f__norank_o__norank_c__KD4-96	OTU2428	340	133	100	44	132	307	111	182	29	176	3	2	0	9	1	1	4	4	1	4	1583
d__Bacteria	k__norank_d__Bacteria	p__Myxococcota	c__Polyangia	o__Polyangiales	f__Phaselicystidaceae	g__Phaselicystis	s__uncultured_bacterium_g__Phaselicystis	OTU1624	0	0	0	2	0	0	0	0	0	0	0	0	0	0	0	0	0	0	0	0	2
d__Bacteria	k__norank_d__Bacteria	p__Spirochaetota	c__Spirochaetia	o__Spirochaetales	f__Spirochaetaceae	g__unclassified_f__Spirochaetaceae	s__unclassified_f__Spirochaetaceae	OTU4096	0	1	1	0	0	0	2	0	1	0	0	0	0	0	0	0	0	0	0	0	5
d__Bacteria	k__norank_d__Bacteria	p__Actinobacteriota	c__Thermoleophilia	o__Gaiellales	f__norank_o__Gaiellales	g__norank_f__norank_o__Gaiellales	s__unclassified_g__norank_f__norank_o__Gaiellales	OTU4767	4	15	18	16	48	15	47	25	141	40	0	1	0	2	1	0	0	1	0	0	374
d__Bacteria	k__norank_d__Bacteria	p__Bacteroidota	c__Ignavibacteria	o__Ignavibacteriales	f__Ignavibacteriaceae	g__Ignavibacterium	s__unclassified_g__Ignavibacterium	OTU2265	1	0	0	1	0	6	0	0	0	0	0	0	0	0	0	0	0	0	0	0	8
d__Bacteria	k__norank_d__Bacteria	p__Bacteroidota	c__Bacteroidia	o__Chitinophagales	f__Chitinophagaceae	g__Aurantisolimonas	s__uncultured_bacterium_g__Aurantisolimonas	OTU2882	1	0	1	0	0	1	0	0	0	0	0	0	0	0	0	0	0	0	0	0	3
d__Bacteria	k__norank_d__Bacteria	p__unclassified_k__norank_d__Bacteria	c__unclassified_k__norank_d__Bacteria	o__unclassified_k__norank_d__Bacteria	f__unclassified_k__norank_d__Bacteria	g__unclassified_k__norank_d__Bacteria	s__unclassified_k__norank_d__Bacteria	OTU7234	0	2	7	0	0	0	8	0	9	0	0	1	0	1	0	0	0	0	0	0	28
d__Bacteria	k__norank_d__Bacteria	p__Acidobacteriota	c__Holophagae	o__Holophagales	f__Holophagaceae	g__norank_f__Holophagaceae	s__unclassified_g__norank_f__Holophagaceae	OTU5264	1	2	1	1	0	0	2	1	4	0	0	0	1	0	0	0	0	0	1	0	14
d__Bacteria	k__norank_d__Bacteria	p__Nitrospirota	c__Thermodesulfovibrionia	o__norank_c__Thermodesulfovibrionia	f__norank_o__norank_c__Thermodesulfovibrionia	g__norank_f__norank_o__norank_c__Thermodesulfovibrionia	s__unclassified_g__norank_f__norank_o__norank_c__Thermodesulfovibrionia	OTU4182	1	0	1	0	0	0	1	0	0	1	0	0	0	0	0	0	0	0	0	0	4
d__Bacteria	k__norank_d__Bacteria	p__Bacteroidota	c__Bacteroidia	o__Sphingobacteriales	f__NS11-12_marine_group	g__norank_f__NS11-12_marine_group	s__uncultured_Bacteroidetes_bacterium_g__norank_f__NS11-12_marine_group	OTU7816	2	5	0	0	2	0	0	0	0	0	5	3	2	2	4	8	18	10	9	4	74
d__Bacteria	k__norank_d__Bacteria	p__Proteobacteria	c__Alphaproteobacteria	o__Micavibrionales	f__norank_o__Micavibrionales	g__norank_f__norank_o__Micavibrionales	s__unclassified_g__norank_f__norank_o__Micavibrionales	OTU2071	0	0	0	0	1	0	0	0	0	0	1	0	0	0	0	0	0	0	1	1	4
d__Bacteria	k__norank_d__Bacteria	p__Bacteroidota	c__Bacteroidia	o__Bacteroidales	f__Bacteroidetes_vadinHA17	g__norank_f__Bacteroidetes_vadinHA17	s__uncultured_Bacteroidetes_bacterium_g__norank_f__Bacteroidetes_vadinHA17	OTU1490	19	55	76	171	84	15	161	38	95	17	0	0	0	1	1	0	1	0	3	0	737
d__Bacteria	k__norank_d__Bacteria	p__Chloroflexi	c__Anaerolineae	o__RBG-13-54-9	f__norank_o__RBG-13-54-9	g__norank_f__norank_o__RBG-13-54-9	s__uncultured_bacterium_g__norank_f__norank_o__RBG-13-54-9	OTU745	0	1	0	0	1	0	1	0	5	0	0	0	0	0	0	1	0	0	0	0	9
d__Bacteria	k__norank_d__Bacteria	p__Proteobacteria	c__Gammaproteobacteria	o__Burkholderiales	f__Oxalobacteraceae	g__norank_f__Oxalobacteraceae	s__unclassified_g__norank_f__Oxalobacteraceae	OTU7989	0	0	1	0	1	1	1	2	1	0	0	0	0	1	0	0	0	3	1	1	13
d__Bacteria	k__norank_d__Bacteria	p__Proteobacteria	c__Alphaproteobacteria	o__Reyranellales	f__Reyranellaceae	g__Reyranella	s__uncultured_bacterium_g__Reyranella	OTU8306	36	28	22	20	24	8	15	12	1	10	7	7	7	5	5	13	10	7	6	5	248
d__Bacteria	k__norank_d__Bacteria	p__Proteobacteria	c__Alphaproteobacteria	o__Rhodospirillales	f__norank_o__Rhodospirillales	g__norank_f__norank_o__Rhodospirillales	s__uncultured_soil_bacterium_g__norank_f__norank_o__Rhodospirillales	OTU8827	1	0	0	0	0	0	0	0	0	0	0	0	0	0	0	0	0	2	1	1	5
[truncated: 7,282 more rows]
