# Supplementary material for: Characteristics of planktonic and sediment bacterial communities in a heavily polluted urban river
Source: PeerJ. 2021 Feb 24;9:e10866. doi: 10.7717/peerj.10866 (PMC7912603; doi:10.7717/peerj.10866)
Supplement: Supplemental Information 5 [file peerj-09-10866-s005.xlsx]

## Sheet: water
Sample	pH	Temperature	NH4+-N	NO3--N	TN	TP	TOC
		(℃)	(mg/kg)	(mg/kg)	(g/kg)	(g/kg)	(g/kg)
SFe1	7.68	14.27	1.31	3.15	9.13	0.86	42.04
	7.92	14.63	1.47	3.77	9.63	0.82	42.87
	7.82	14.6	1.33	3.47	9.9	0.81	43.64
SFe2	7.85	14.13	1.83	4.28	10.96	0.92	50.89
	7.69	13.75	1.83	4.44	10.99	0.94	49.44
	7.78	13.82	1.92	3.89	10.23	0.93	50.56
SFe3	7.77	13.69	1.74	1.91	7.53	0.66	44.88
	7.83	13.87	1.74	1.82	6.76	0.63	45.76
	7.8	13.85	1.68	2.21	6.95	0.67	44.75
SFe4	7.82	14.19	1.13	3.02	7.89	0.6	48.9
	7.63	14.38	0.91	2.7	8.4	0.61	47.97
	7.77	14.33	1.05	2.68	7.92	0.64	48.69
SFe5	7.96	14.01	1.43	2.1	4.32	0.55	40.52
	7.46	14.33	1.58	2.55	4.83	0.57	40.96
	8.01	13.97	1.34	2.01	4.14	0.46	41.25
SAu1	7.34	26.62	1.79	1.94	6.6	0.5	57.07
	7.62	26.64	1.82	2.14	6.81	0.48	55.23
	7.75	27.15	1.96	2.01	5.85	0.49	56.75
SAu2	7.82	26.34	2.32	2.86	7.91	0.24	53.17
	7.73	26.37	2.07	3.15	7.92	0.25	55.47
	7.91	26.18	1.94	3.2	8.56	0.23	53.75
SAu3	7.36	26.89	1.8	2.13	4.99	0.42	46.52
	7.44	27.29	1.79	2.23	4.41	0.38	44.85
	7.28	27.12	1.72	2.72	4.85	0.34	45.4
SAu4	7.55	26.46	1.11	4.07	4.75	0.45	34.89
	7.8	26.48	1.06	3.81	5.28	0.35	34.8
	7.72	25.95	1.01	3.76	5.21	0.53	35.62
SAu5	7.84	26.11	1.25	2.16	7.09	0.54	35.83
	7.95	26.51	1.05	2.23	6.39	0.53	34.43
	7.97	26.28	1.15	1.94	6.99	0.43	33.82

## Sheet: sediment
Sample	pH	Temperature	NH4+-N	NO3--N	TN	TP	TOC
		(℃)	(mg/kg)	(mg/kg)	(g/kg)	(g/kg)	(g/kg)
SFe1	7.33	14.37	19.36	86.54	0.67	0.63	23.02
	7.42	14.71	19.47	87.66	0.71	0.64	23.96
	7.36	14.72	18.83	87.43	0.69	0.65	24.08
SFe2	7.21	14.5	18.68	82.44	0.6	0.68	35.16
	7.24	14.6	18.3	83.55	0.58	0.75	36.23
	7.18	14.4	18.4	84.24	0.58	0.67	35.19
SFe3	7.14	13.69	15.76	62.1	0.39	0.51	15.92
	6.99	13.61	15.91	61.96	0.38	0.49	16.7
	7.11	13.81	15.35	61.25	0.4	0.5	16.38
SFe4	7.27	14.48	17.7	65.6	0.57	0.86	27.88
	7.18	14.61	17.04	65.95	0.59	0.82	27.21
	7.13	14.41	17.28	65.31	0.67	0.94	27.05
SFe5	7.56	14.35	19.22	67.47	0.58	0.74	24.2
	7.42	14.52	19.24	66.14	0.61	0.6	24.78
	7.64	14.34	18.9	66.95	0.55	0.7	24.52
SAu1	7.34	26.07	18.95	68.53	0.67	0.29	10.52
	7.36	25.68	18.61	68.91	0.71	0.3	12.11
	7.38	25.95	19	67.73	0.68	0.28	11.47
SAu2	7.31	25.92	16.53	80.82	0.65	0.37	14.88
	7.24	25.75	16.39	79.85	0.66	0.39	14.93
	7.31	26.33	15.95	81.28	0.54	0.38	13.71
SAu3	7.25	25.84	14.44	53.4	0.35	0.24	9.49
	6.99	25.84	14.95	53.64	0.34	0.21	8.73
	7.1	26.02	14.53	54.45	0.36	0.2	8.76
SAu4	7.26	25.87	13.68	44.55	0.34	0.48	20.62
	7.3	25.57	13.3	44.83	0.33	0.42	19.46
	7.43	25.96	13.46	45.52	0.35	0.5	21
SAu5	7.35	25.8	13.69	46.59	0.36	0.34	11.42
	7.26	25.6	14.24	45.36	0.38	0.31	11.74
	7.23	25.7	13.98	45.83	0.34	0.31	11.76
